# Supplementary material
Source: publisher figshare collection journal article supplement (https://acs.figshare.com/ndownloader/files/38946407)

# Synthesis of Trifluoromethyl Substituted Allenols via Catalytic Trifluoromethylbenzoxylation of 1,3-Enynes

## Supporting Information

Songrong Li,<sup>a†</sup> Wenwen Yang,<sup>a†</sup> Junjie Shi,<sup>a</sup> Tingting Dan,<sup>a</sup> Yujie Han,<sup>a</sup> Zhi-Chao Cao,<sup>\*b</sup> and  
Mingyu Yang,<sup>\*a</sup>

[a] *Key Laboratory of Applied Surface and Colloid Chemistry of MOE, School of Chemistry and Chemical Engineering, Shaanxi Normal University, Xi'an, 710119, China*

Email: [yangmy05@snnu.edu.cn](mailto:yangmy05@snnu.edu.cn)

[b] *Anhui Agricultural University, Hefei, Anhui, China 230036*

E-mail: [zc\\_cao@ahau.edu.cn](mailto:zc_cao@ahau.edu.cn)

### Table of Contents

|                                                                     |          |
|---------------------------------------------------------------------|----------|
| <b>Instrumentation and Chemicals</b>                                | S1–S2    |
| <b>Preparation of Togni's Reagent and 1,3 - Enynes</b>              | S3–S5    |
| <b>Characterization Data for 1,3 - Enynes</b>                       | S5–S13   |
| <b>General Procedure for 1, 4-functionalization of 1,3 - Enynes</b> | S14      |
| <b>Characterization Data for Products</b>                           | S14–S28  |
| <b>Late-stage functionalization of allene compounds</b>             | S28–S35  |
| <b>NOESY Experiments</b>                                            | S36      |
| <b>Characterization Data for 1,3-dienes</b>                         | S37–S45  |
| <b>Mechanism Study</b>                                              | S45–S52  |
| <b>References</b>                                                   | S52–S53  |
| <b>NMR Spectra</b>                                                  | S54–S155 |

## Instrumentation and Chemicals

NMR spectra were recorded on Bruker 400 M and 600 M, JEOL 400 M spectrometers, operating at 400 and 600 MHz for  $^1\text{H}$  NMR, 100 and 150 MHz for  $^{13}\text{C}$  NMR spectrophotometer, 376 MHz for  $^{19}\text{F}$  NMR using  $\text{CDCl}_3$  and TMS as the internal standard. Chemical shift values for  $^1\text{H}$  and  $^{13}\text{C}$  are referenced to residual solvent peaks ( $\text{CHCl}_3$  in  $\text{CDCl}_3$ : 7.26 ppm for  $^1\text{H}$ , 77.00 ppm for  $^{13}\text{C}$ ; Chemical shifts are reported in  $\delta$  ppm. All coupling constants ( $J$  values) were reported in Hertz (Hz). Data for  $^1\text{H}$  NMR spectra are reported as follows: chemical shift (ppm, referenced to TMS; s = singlet, d = doublet, t = triplet, q = quartet, dd = doublet of doublets, dt = doublet of triplets, m = multiplet), coupling constant (Hz) and integration. Column chromatography was performed on silica gel 200-300 mesh. High-resolution mass spectra (HRMS) were recorded on electron-spray ionization (ESI) technique or Atmospheric Pressure Chemical Ionization (APCI) technique. Ultra-high resolution mass spectrometry detected by Fourier transform ion cyclotron resonance mass spectrometer (FT-ICR-MS).

## Experimental Section

All reactions were carried out under nitrogen atmosphere. Materials were obtained from commercial suppliers or prepared according to standard note procedures unless otherwise noted.  $\text{CuI}$  was purchased from Energy Chemical Reagent Co., Ltd.,  $\text{Pd}(\text{PPh}_3)_4$  was purchased from, DCE was freshly distilled over  $\text{CaH}_2$  under  $\text{N}_2$ . Energy Chemical Reagent Co., Ltd. EDC·HCl was the abbreviations of 1-(3-dimethylaminopropyl) -3-ethylcarbodiimide hydrochloride, it was purchased from Energy Chemical Reagent Co., Ltd.; HOBt was the abbreviations of 1-Hydroxybenzotriazole, it was purchased from Energy Chemical Reagent Co., Ltd..

## General Procedure A: Preparation of 1,3 – Enynes<sup>[2]</sup>

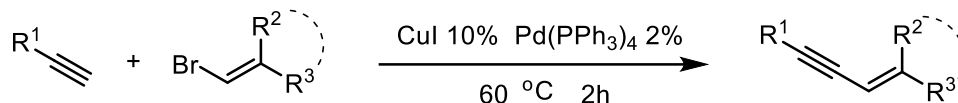

Alkenyl bromide (1.1 equiv, 15 mmol) was added to a solution of Pd(PPh<sub>3</sub>)<sub>4</sub> (231 mg, 0.20 mmol) and CuI (189 mg, 1.0 mmol) in piperidine (20 mL). The solution was stirred for 5 min, then Terminal alkyne (1.0 equiv, 10 mmol) was added, and the mixture was stirred at 60 °C for 2 h. The mixture was cooled to room temperature, and saturated aqueous NH<sub>4</sub>Cl solution (50 mL) was added. The mixture was extracted with petroleum ether (3 × 20 mL) and the combined organic phases washed with brine (20 mL), dried (Na<sub>2</sub>SO<sub>4</sub>), filtered, and concentrated in vacuo. The mixture was purified by column chromatography (100% petroleum ether) to give 1,3-enynes as a Colourless oil.

### Preparation of 1y:

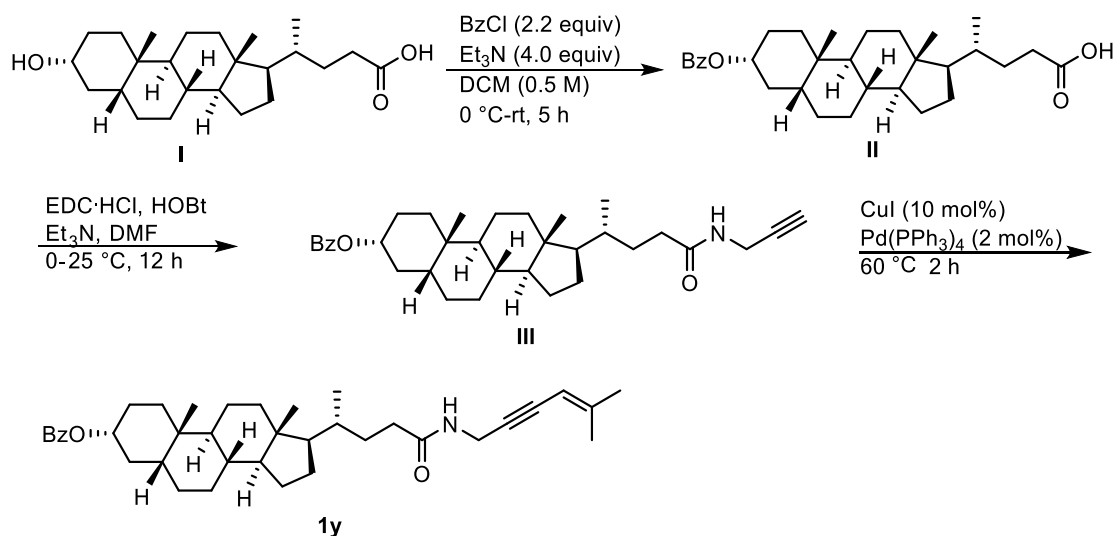

Triethylamine was added (2.04 g, 20 mmol) to a solution of lithocholic acid (1.88 g, 5.0 mmol) in DMF (14.0 mL). And then, benzyl bromide (1.3 mL, 11 mmol) was slowly added to the reaction mixture. The resulting solution was stirring room temperature for 5 hours. The reaction was quenched by water and extracted with ethyl acetate (3 × 50 mL). Combining the organic phase and dried with magnesium sulfate and evaporated the solvent under vacuum to give residue. The residue was purified by chromatography on silica gel (ethyl acetate/hexane 1:9 to 1:1) to obtain the product **II**. EDC·HCl (1.5

equiv.) and HOBt (0.5 equiv.) were added to a solution of **II** (1 equiv.) and propargyl amine (1.1 equiv.) in dry DMF (5 mL) under argon at 0 °C. After the addition, the reaction mixture was allowed to warm up to 25 °C and was stirred for 12 h. The reaction was quenched by adding crushed ice and extracted three times with ethyl acetate. The combined extracts were washed with water and brine, dried over anhydrous sodium sulfate, filtered and concentrated in vacuo. The resulting crude product was purified by column chromatography to give pure alkyne compounds **III**. Compound **1z** was followed the same procedure as preparation of 1,3 - enynes.

1,3 - Enynes, **1a**,<sup>[2]</sup> **1b**,<sup>[2]</sup> **1c**,<sup>[2]</sup> **1d**,<sup>[2]</sup> **1e**,<sup>[3]</sup> **1f**,<sup>[3]</sup> **1g**,<sup>[7]</sup> **1h**,<sup>[3]</sup> **1i**,<sup>[5]</sup> **1j**,<sup>[5]</sup> **1k**,<sup>[5]</sup> **1l**,<sup>[4]</sup> **1n**,<sup>[7]</sup> **1o**,<sup>[4]</sup> **1r**,<sup>[4]</sup> **1t**,<sup>[4]</sup> **1u**,<sup>[4]</sup> **1v**,<sup>[3]</sup> **1w**<sup>[3]</sup> can be found in literatures.

#### General Procedure B: Preparation of bromide<sup>[8]</sup>

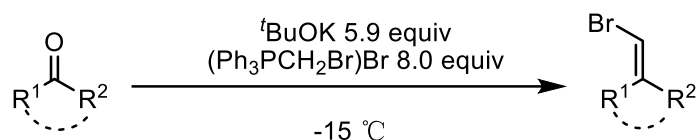

A suspension of (Ph<sub>3</sub>PCH<sub>2</sub>Br)Br (28.0 g, 64.2 mmol, 8.0 equiv) in dry toluene (200 mL) was sonicated for 30 min at rt and then stirred at –15 °C for 15 min. Then KO<sup>t</sup>Bu (7.10 g, 63.2 mmol, 5.9 equiv) was added. The yellow mixture was stirred at –15 °C for 3 h. Then a 0 °C cooled solution of ketone (10.07 mmol, 1.0 equiv) in dry toluene (100 mL) was added dropwise via cannula. The reaction mixture was stirred at –10 °C for 1 h and then without cooling bath for 1.5 h. The reaction was quenched by a few drops of saturated NH<sub>4</sub>Cl. The mixture was filtered through a short pad of silica gel washing with hexanes. Concentration gave a residue which was purified by flash chromatography (hexanes) to afford bromide.

#### General Procedure C: Preparation of Togni's Reagent<sup>[9]</sup> (2)



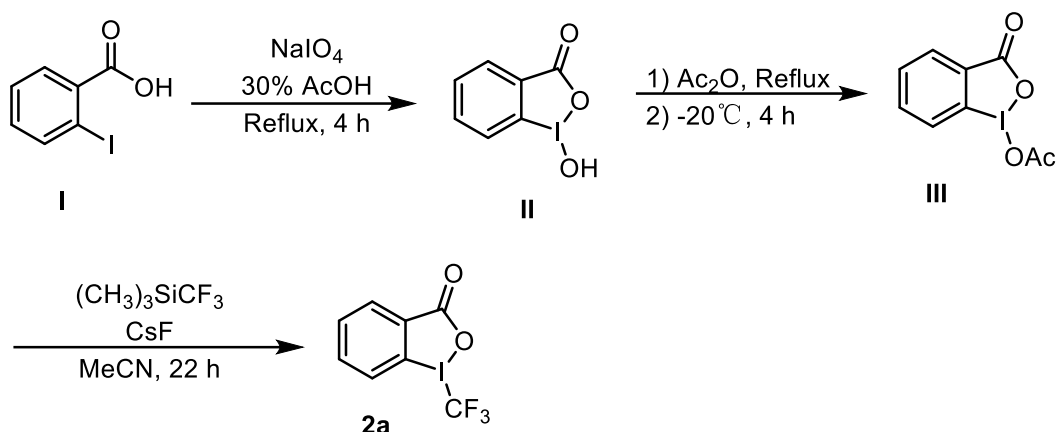

$\text{NaIO}_4$  (7.24 g, 33.8 mmol) and 2-iodobenzene (**I**) (8 g, 32.2 mmol) were added to 50 mL of 30% (v/v)  $\text{AcOH}$  and refluxed for 4 hours with vigorous stirring. The reaction mixture was then diluted with 180 mL of cold water, cooled to room temperature, and the crude was collected via suction filtration. The crude white solid was washed with cold water (10 mL  $\times$  3) and acetone (10 mL  $\times$  3), and air dried in the dark overnight to afford compound **II**.

Compound **II** (6.00 g, 21.1 mmol) was refluxed in  $\text{Ac}_2\text{O}$  until the solution became clear. The reaction mixture was then cooled slowly to  $-20^\circ\text{C}$  for 4 hours using a dry ice/ethylene glycol: ethanol (9:1) bath. The solution was decanted, and the white solid (**III**) was dried under vacuum with stirring for 24 hours.

Compound **III** was dissolved in 50 mL of dry  $\text{MeCN}$  (under Ar). To the mixture, trimethyl (trifluoromethyl) silane (4.5 mL, 30.4 mmol) and cesium fluoride (0.05 g, 0.33 mmol) were added under argon. The reaction mixture was then stirred vigorously at room temperature for 22 hours. The solvent was removed using a rotovap, and the mixture was purified by column chromatography ( $\text{CH}_2\text{Cl}_2$ :  $\text{MeOH}$  = 15:1) to afford the final product **2** as a pure white solid (4.5 g, 67% isolated yield from **II**).

## Characterization Data for 1,3 – Enynes

### 2-methylnon-2-en-4-yne (1a)

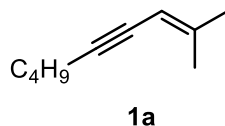

Colourless oil.  $^1\text{H NMR}$  (600 MHz,  $\text{CDCl}_3$ )  $\delta$ = 5.24 (s, 1H), 2.33 (t,  $J$  = 6.6 Hz, 2H), 1.87 (s, 3H), 1.77 (s, 3H), 1.53 (dd,  $J$  = 15, 7.2 Hz, 2H), 1.44 (dd,  $J$  = 15, 7.2 Hz, 2H), 0.92 (t,  $J$  = 7.2 Hz, 3H).  $^{13}\text{C NMR}$  (150 MHz,  $\text{CDCl}_3$ )  $\delta$ = 146.56, 105.46, 92.12, 78.38, 31.14, 24.58, 21.96, 20.70, 19.18, 13.60.

### 2-methyldec-2-en-4-yne (1b)

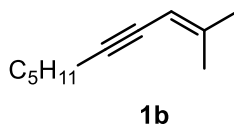

Colourless oil.  $^1\text{H NMR}$  (600 MHz,  $\text{CDCl}_3$ )  $\delta$ = 5.24 (s, 1H), 2.33 (t,  $J$  = 6.6 Hz, 2H), 1.87 (s, 3H), 1.77 (s, 3H), 1.53 (dd,  $J$  = 15, 7.2 Hz, 2H), 1.39 (dd,  $J$  = 8.4, 7.2 Hz, 2H), 1.33 (dd,  $J$  = 15, 7.2 Hz, 2H), 0.90 (t,  $J$  = 7.2 Hz, 3H).  $^{13}\text{C NMR}$  (150 MHz,  $\text{CDCl}_3$ )  $\delta$ = 146.55, 105.46, 92.18, 78.37, 31.08, 28.74, 24.57, 22.21, 20.68, 19.46, 13.96.

### 2-methylundec-2-en-4-yne (1c)

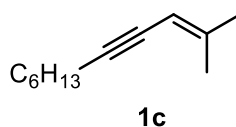

Colourless oil.  $^1\text{H NMR}$  (600 MHz,  $\text{CDCl}_3$ )  $\delta$ = 5.24 (s, 1H), 2.33 (t,  $J$  = 6.4 Hz, 2H), 1.87 (s, 3H), 1.77 (s, 3H), 1.53 (dd,  $J$  = 15.3, 5.1 Hz, 2H), 1.38–1.43 (m, 2H), 1.27–1.32 (m, 4H), 0.89 (t,  $J$  = 7.2 Hz, 3H).  $^{13}\text{C NMR}$  (150 MHz,  $\text{CDCl}_3$ )  $\delta$ = 146.57, 105.46, 92.19, 78.39, 31.37, 29.02, 28.57, 24.58, 22.56, 20.69, 19.50, 14.03.

### 2,7-dimethyloct-2-en-4-yne (1d)

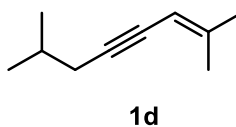

Colourless oil.  $^1\text{H NMR}$  (600 MHz,  $\text{CDCl}_3$ )  $\delta$  = 5.25 (s, 1H), 2.21–2.29 (d,  $J$  = 6.4 Hz, 2H), 1.88 (s, 3H), 1.80–1.85 (m, 1H), 1.78 (s, 3H), 0.97–1.00 (d,  $J$  = 6.6 Hz, 6H).  $^{13}\text{C NMR}$  (150 MHz,  $\text{CDCl}_3$ )  $\delta$  = 146.56, 105.48, 91.01, 79.25, 28.71, 28.29, 28.03, 24.57, 21.99, 20.72.

**(5-methylhex-4-en-2-yn-1-yl)cyclopentane(1e)**

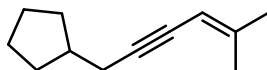

**1e**

Colourless oil.  $^1\text{H NMR}$  (600 MHz,  $\text{CDCl}_3$ )  $\delta$  = 5.24 (s, 1H), 2.70–2.79 (m, 1H), 1.92 (m, 3H), 1.86 (s, 3H), 1.77 (s, 3H), 1.73 (m, 3H), 1.58–1.66 (m, 3H), 1.55 (m, 1H).  $^{13}\text{C NMR}$  (150 MHz,  $\text{CDCl}_3$ )  $\delta$  = 146.51, 105.50, 96.45, 82.22, 76.83, 64.74, 34.16, 33.60, 31.00, 30.53, 24.98, 24.61, 20.71.

**(5-methylhex-4-en-2-yn-1-yl)cyclohexane(1f)**

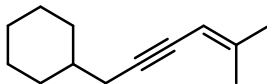

**1f**

Colourless oil.  $^1\text{H NMR}$  (600 MHz,  $\text{CDCl}_3$ )  $\delta$  = 5.24 (s, 1H), 2.22 (d,  $J$  = 6.6 Hz, 2H), 1.87 (s, 3H), 1.82 (d,  $J$  = 11.7 Hz, 2H), 1.77 (s, 3H), 1.69–1.75 (m, 2H), 1.62–1.68 (m, 1H), 1.43–1.52 (m, 1H), 1.21–1.29 (m, 2H), 1.10–1.19 (m, 1H), 1.01 (ddd,  $J$  = 24.6, 12.6, 3.3 Hz, 2H).  $^{13}\text{C NMR}$  (150 MHz,  $\text{CDCl}_3$ )  $\delta$  = 146.61, 105.76, 91.16, 79.45, 37.85, 32.93, 27.56, 26.51, 26.38, 24.75, 20.94.

**(6-methylhept-5-en-3-yn-1-yl)benzene(1g)**

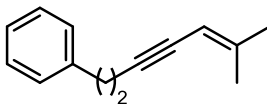

**1g**

Colourless oil.  $^1\text{H NMR}$  (600 MHz,  $\text{CDCl}_3$ )  $\delta$  = 7.27 (t,  $J$  = 7.5 Hz, 2H), 7.22 (d,  $J$  = 7.5 Hz, 2H), 7.19 (t,  $J$  = 7.5 Hz, 1H), 5.22 (s, 1H), 2.85 (t,  $J$  = 7.5 Hz, 2H), 2.62 (d,  $J$  =

7.5 Hz, 2H), 1.82 (s, 3H), 1.76 (s, 3H).  $^{13}\text{C}$  NMR (150 MHz,  $\text{CDCl}_3$ )  $\delta$ = 146.98, 140.81, 128.41, 128.27, 126.13, 105.27, 91.12, 79.07, 35.44, 24.57, 21.67, 20.67.

**(4-methylpent-3-en-1-yn-1-yl)cyclopropane(1h)**

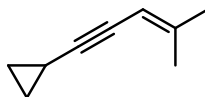

**1h**

Colourless oil.  $^1\text{H}$  NMR (600 MHz,  $\text{CDCl}_3$ )  $\delta$ = 5.19 (s, 1H), 1.85 (s, 3H), 1.76 (s, 3H), 1.33–1.43 (m, 1H), 0.79 (dd,  $J$  = 8.1 Hz, 2.4 Hz, 2H), 0.68 (dd,  $J$  = 4.8, 2.4 Hz, 2H).  $^{13}\text{C}$  NMR (150 MHz,  $\text{CDCl}_3$ )  $\delta$ = 147.00, 105.28, 95.15, 73.65, 24.58, 20.72, 8.57, 0.23.

**8-chloro-2-methyloct-2-en-4-yne(1i)**

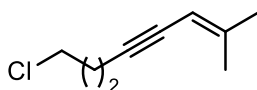

**1i**

Colourless oil.  $^1\text{H}$  NMR (600 MHz,  $\text{CDCl}_3$ )  $\delta$ = 5.23 (s, 1H), 3.68 (t,  $J$  = 6.3 Hz, 2H), 2.53 (t,  $J$  = 6.6 Hz, 2H), 1.99 (p,  $J$  = 6.6 Hz, 2H), 1.87 (s, 3H), 1.78 (s, 3H).  $^{13}\text{C}$  NMR (150 MHz,  $\text{CDCl}_3$ )  $\delta$ = 147.35, 105.14, 89.74, 79.42, 43.76, 31.72, 24.60, 20.78, 16.96.

**2-(5-methylhex-4-en-2-yn-1-yl)isoindoline-1,3-dione(1j)**

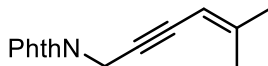

**1j**

White gam.  $^1\text{H}$  NMR (600 MHz,  $\text{CDCl}_3$ )  $\delta$ = 7.88 (dd,  $J$  = 5.4, 3.0 Hz, 2H), 7.73 (dd,  $J$  = 5.4, 3.0 Hz, 2H), 5.20 (s, 1H), 4.60 (s, 2H), 1.86 (s, 3H), 1.77 (s, 3H).  $^{13}\text{C}$  NMR (150 MHz,  $\text{CDCl}_3$ )  $\delta$ = 167.16, 150.03, 134.05, 132.18, 123.46, 104.40, 84.36, 81.19, 28.03, 24.73, 21.04.

**4-methyl-N-(5-methylhex-4-en-2-yn-1-yl)benzenesulfonamide(1k)**

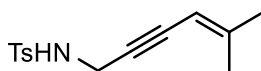

**1k**

Yellow oil.  $^1\text{H}$  NMR (600 MHz,  $\text{CDCl}_3$ )  $\delta$ = 7.78 (d,  $J$  = 7.8 Hz, 2H), 7.30 (d,  $J$  = 7.8 Hz, 2H), 5.03 (s, 1H), 4.59 (s, 1H), 3.98 (d,  $J$  = 5.1 Hz, 2H), 2.42 (s, 3H), 1.75 (s, 3H),

1.71 (s, 3H). **<sup>13</sup>C NMR** (150 MHz, CDCl<sub>3</sub>)  $\delta$  = 149.89, 143.85, 136.90, 129.86, 127.59, 104.30, 85.07, 83.04, 34.18, 24.93, 21.73, 21.09.

**tert-butyl (5-methylhex-4-en-2-yn-1-yl)carbamate(1l)**

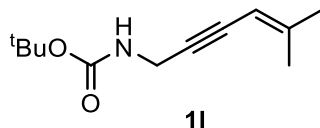

Yellow oil. **<sup>1</sup>H NMR** (600 MHz, CDCl<sub>3</sub>)  $\delta$  = 5.23 (s, 1H), 4.74 (s, 1H), 4.06 (s, 2H), 1.87 (s, 3H), 1.79 (s, 3H), 1.45 (s, 9H). **<sup>13</sup>C NMR** (150 MHz, CDCl<sub>3</sub>)  $\delta$  = 155.30, 149.00, 104.59, 87.10, 81.17, 79.77, 31.35, 28.35, 24.70, 20.91.

**N-(5-methylhex-4-en-2-yn-1-yl)benzamide (1m)**

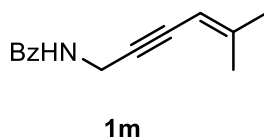

Yellow oil. **<sup>1</sup>H NMR** (600 MHz, CDCl<sub>3</sub>)  $\delta$  = 7.79 (d,  $J$  = 7.2 Hz, 2H), 7.50 (t,  $J$  = 7.5 Hz, 1H), 7.43 (t,  $J$  = 7.5 Hz, 2H), 6.35 (s, 1H), 5.26 (s, 1H), 4.40 (d,  $J$  = 3.0 Hz, 2H), 1.89 (s, 3H), 1.80 (s, 3H). **<sup>13</sup>C NMR** (150 MHz, CDCl<sub>3</sub>)  $\delta$  = 166.96, 149.55, 134.00, 131.61, 128.55, 126.96, 104.42, 86.34, 81.80, 30.82, 24.73, 21.00. **IR** (KBr, cm<sup>-1</sup>): 3418, 1641, 1400, 1111, 617. **HRMS-ESI**( $m/z$ ): [M+Na]<sup>+</sup> calcd. for C<sub>14</sub>H<sub>15</sub>NNaO, 236.1046; found, 236.1044.

**6-methylhept-5-en-3-yn-1-ol(1n)**

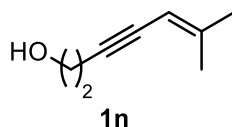

Colourless oil. **<sup>1</sup>H NMR** (600 MHz, CDCl<sub>3</sub>)  $\delta$  = 5.24 (s, 1H), 3.74 (q,  $J$  = 6.3 Hz, 2H), 2.62 (t,  $J$  = 5.4 Hz, 2H), 1.88 (s, 3H), 1.79 (s, 3H). **<sup>13</sup>C NMR** (151 MHz, CDCl<sub>3</sub>)  $\delta$  = 147.93, 104.96, 87.90, 80.52, 61.36, 24.67, 23.95, 20.88.

**8-methylnon-7-en-5-yn-1-ol(1o)**

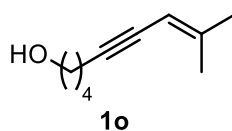

Colourless oil. **<sup>1</sup>H NMR** (600 MHz, CDCl<sub>3</sub>)  $\delta$ = 5.23 (s, 1H), 3.69 (t,  $J$  = 6.3 Hz, 2H), 2.39 (t,  $J$  = 6.1 Hz, 2H), 1.87 (s, 3H), 1.78 (s, 3H), 1.68–1.74 (m, 2H), 1.60–1.67 (m, 2H). **<sup>13</sup>C NMR** (150 MHz, CDCl<sub>3</sub>)  $\delta$ = 146.87, 105.33, 91.57, 78.83, 62.52, 31.92, 25.28, 24.59, 20.75, 19.29.

**tert-butyldimethyl((6-methylhept-5-en-3-yn-1-yl) oxy)silane (1p)**

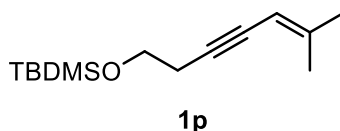

Colourless oil. **<sup>1</sup>H NMR** (600 MHz, CDCl<sub>3</sub>)  $\delta$ = 5.22 (s, 1H), 3.74 (t,  $J$  = 7.2 Hz, 2H), 2.55 (s, 2H), 1.86 (s, 3H), 1.77 (s, 3H), 0.90 (s, 9H), 0.07 (s, 6H). **<sup>13</sup>C NMR** (150 MHz, CDCl<sub>3</sub>)  $\delta$ = 147.17, 105.24, 88.63, 79.49, 62.27, 25.90, 24.60, 23.94, 20.78, 18.33, -5.28. **IR** (KBr, cm<sup>-1</sup>): 3417, 1619, 1400, 1109, 615. **HRMS-APCI**(m/z): [M+H]<sup>+</sup> calcd. for C<sub>14</sub>H<sub>27</sub>NOSi, 239.1826; found, 239.1826.

**triisopropyl((6-methylhept-5-en-3-yn-1-yl)oxy)silane (1q)**

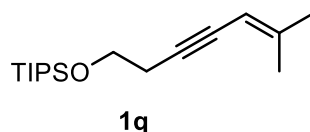

Colourless oil. **<sup>1</sup>H NMR** (600 MHz, CDCl<sub>3</sub>)  $\delta$ = 5.22 (s, 1H), 3.82 (t,  $J$  = 7.2 Hz, 2H), 2.58 (t,  $J$  = 7.2 Hz, 2H), 1.86 (s, 3H), 1.77 (s, 3H), 1.07 (s, 21H). **<sup>13</sup>C NMR** (150 MHz, CDCl<sub>3</sub>)  $\delta$ = 147.13, 105.25, 88.63, 79.45, 62.52, 24.59, 24.01, 20.76, 17.95, 11.98. **IR** (KBr, cm<sup>-1</sup>): 3417, 2944, 2868, 1721, 1627, 1464, 1386, 1251, 1111, 884, 683. **HRMS-ESI**(m/z): [M+Na]<sup>+</sup> calcd. for C<sub>17</sub>H<sub>32</sub>NNaOSi, 303.2115; found, 303.2118.

**2-((6-methylhept-5-en-3-yn-1-yl) oxy)tetrahydro-2H-pyran(1r)**

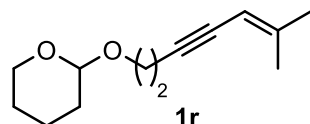

Colourless oil. **<sup>1</sup>H NMR** (600 MHz, CDCl<sub>3</sub>)  $\delta$ = 5.22 (s, 1H), 4.66 (t,  $J$  = 3.6 Hz, 1H), 3.89 (s, 1H), 3.82–3.86 (m, 1H), 3.56–3.60 (m, 1H), 3.52 (s, 1H), 2.62–2.66 (m, 2H), 1.87 (s, 3H), 1.77 (s, 3H), 1.69–1.74 (m, 1H), 1.57–1.62 (m, 2H), 1.49–1.54 (m, 2H).

**$^{13}\text{C}$  NMR** (150 MHz,  $\text{CDCl}_3$ )  $\delta$ = 147.21, 105.25, 98.74, 88.51, 79.36, 66.09, 62.14, 30.58, 25.44, 24.57, 20.99, 20.72, 19.38.

**6-methylhept-5-en-3-yn-1-yl pivalate (1s)**

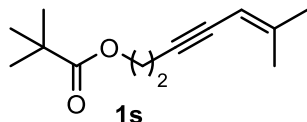

Colourless oil.  **$^1\text{H}$  NMR** (600 MHz,  $\text{CDCl}_3$ )  $\delta$ = 5.22 (s, 1H), 4.17 (t,  $J$  = 6.9 Hz, 2H), 2.66 (td,  $J$  = 6.6, 1.5 Hz, 2H), 1.86 (s, 3H), 1.78 (s, 3H), 1.21 (s, 9H).  **$^{13}\text{C}$  NMR** (150 MHz,  $\text{CDCl}_3$ )  $\delta$ = 178.32, 147.71, 105.01, 87.20, 79.74, 62.51, 38.70, 27.12, 24.60, 20.75, 19.97. **HRMS-ESI**( $m/z$ ):  $[\text{M}+\text{Na}]^+$  calcd. for  $\text{C}_{13}\text{H}_{20}\text{NaO}_2$ , 231.1356; found, 231.1361.

**6-methylhept-5-en-3-yn-1-yl 4-methylbenzenesulfonate(1t)**

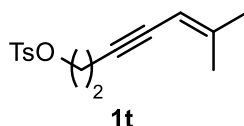

Colourless oil.  **$^1\text{H}$  NMR** (600 MHz,  $\text{CDCl}_3$ )  $\delta$ = 7.80 (d,  $J$  = 8.1 Hz, 2H), 7.34 (d,  $J$  = 8.1 Hz, 2H), 5.15 (s, 1H), 4.11 (t,  $J$  = 7.2 Hz, 2H), 2.70 (t,  $J$  = 6.3 Hz, 2H), 2.45 (s, 3H), 1.82 (s, 3H), 1.77 (s, 3H).  **$^{13}\text{C}$  NMR** (150 MHz,  $\text{CDCl}_3$ )  $\delta$ = 148.46, 144.84, 133.00, 129.84, 127.94, 104.68, 85.26, 80.68, 68.01, 24.65, 21.62, 20.83, 20.46.

**6-methylhept-5-en-3-yn-1-yl benzoate(1u)**

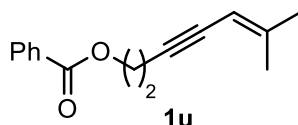

Colourless oil.  **$^1\text{H}$  NMR** (600 MHz,  $\text{CDCl}_3$ )  $\delta$ = 8.06 (d,  $J$  = 7.2 Hz, 2H), 7.56 (t,  $J$  = 7.2 Hz, 1H), 7.44 (t,  $J$  = 7.2 Hz, 2H), 5.23 (s, 1H), 4.44 (t,  $J$  = 6.6 Hz, 2H), 2.82 (t,  $J$  = 6.6, 2H), 1.85 (s, 3H), 1.78 (s, 3H).  **$^{13}\text{C}$  NMR** (150 MHz,  $\text{CDCl}_3$ )  $\delta$ = 166.35, 147.96, 132.97, 130.09, 129.65, 128.31, 104.98, 87.07, 80.02, 63.17, 24.62, 20.77, 20.13.

**hept-2-yn-1-ylidenecyclohexane (1v)**

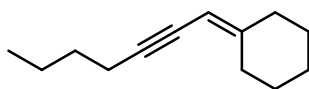

**1v**

Colourless oil. **<sup>1</sup>H NMR** (600 MHz, CDCl<sub>3</sub>)  $\delta$ = 5.18 (s, 1H), 2.35–2.41 (m, 2H), 2.32 (td,  $J$  = 7.2, 2.1 Hz, 2H), 2.13 (t,  $J$  = 6.0, 2H), 1.54–1.60 (m, 4H), 1.48–1.54 (m, 4H), 1.42 (dt,  $J$  = 14.1, 7.2 Hz, 2H), 0.92 (t,  $J$  = 7.2, 3H). **<sup>13</sup>C NMR** (150 MHz, CDCl<sub>3</sub>)  $\delta$ = 153.87, 101.80, 91.87, 77.82, 35.73, 31.25, 31.09, 28.17, 27.40, 26.33, 21.95, 19.19, 13.57.

**(3-methyldec-3-en-5-yn-1-yl)benzene (E,Z mixture 3:2)**

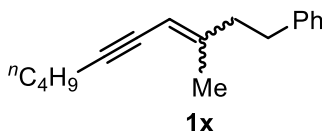

**1x**

Yellow oil. **<sup>1</sup>H NMR** (600 MHz, CDCl<sub>3</sub>)  $\delta$ = 7.25–7.29 (m, 2H $\times$ 3/5, 2H $\times$ 2/5), 7.21–7.24 (m, 1H $\times$ 3/5, 1H $\times$ 2/5), 7.16–7.19 (m, 2H $\times$ 3/5, 2H $\times$ 2/5), 5.27–5.29 (m, 1H $\times$ 3/5, 1H $\times$ 2/5), 2.71–2.76 (m, 2H $\times$ 3/5, 2H $\times$ 2/5), 2.57–2.59 (m, 1H $\times$ 3/5, 1H $\times$ 2/5), 2.31–2.37 (m, 3H $\times$ 3/5, 3H $\times$ 2/5), 1.91 (s, 3H $\times$ 3/5), 1.77 (s, 3H $\times$ 2/5), 1.50–1.53 (m, 2H $\times$ 3/5, 2H $\times$ 2/5), 1.41–1.45 (m, 2H $\times$ 3/5, 2H $\times$ 2/5), 0.92 (t,  $J$  = 7.2 Hz, 3H $\times$ 3/5), 0.91 (t,  $J$  = 7.2 Hz, 3H $\times$ 2/5). **<sup>13</sup>C NMR** (150 MHz, CDCl<sub>3</sub>)  $\delta$ = 149.59, 149.39, 128.34 $\times$ 2, 128.26 $\times$ 2, 128.24 $\times$ 2, 125.81, 125.78, 106.20, 105.60, 92.99, 92.59, 78.24, 78.05, 40.38 $\times$ 2, 36.49 $\times$ 2, 34.30, 34.03, 31.10, 22.55, 21.98, 21.96, 19.22, 19.16, 13.60 $\times$ 2. **IR** (KBr, cm<sup>-1</sup>): 3754, 3655, 2931, 1457, 1369, 698. **HRMS-ESI**(m/z): [M+H]<sup>+</sup> calcd. for C<sub>17</sub>H<sub>23</sub>, 227.1794; found, 227.1795.

**(3R,5R,10R,13R,17R)-5,10,13-trimethyl-17-((R)-5-((5-methylhex-4-en-2-yn-1-yl)amino)-5-oxopentan-2-yl)hexadecahydro-1H-cyclopenta[a]phenanthren-3-yl benzoate (1y)**



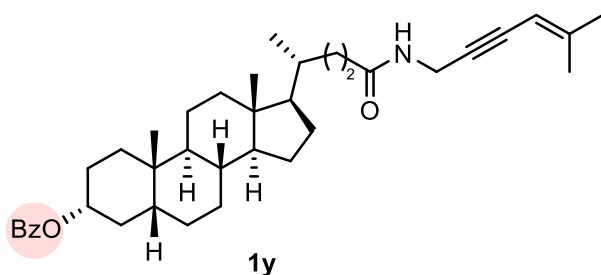

Yellow foam. **<sup>1</sup>H NMR** (600 MHz, CDCl<sub>3</sub>)  $\delta$ = 8.05 (d,  $J$  = 7.5 Hz, 2H), 7.54 (d,  $J$  = 7.5 Hz, 1H), 7.43 (t,  $J$  = 7.5 Hz, 2H), 5.70 (s, 1H), 5.23 (s, 1H), 4.97 (s, 1H), 4.19 (d,  $J$  = 3.3 Hz, 2H), 2.26 (s, 1H), 2.17 (s, 1H), 2.08 (ddd,  $J$  = 18.0, 12.3, 6.9 Hz, 1H), 1.97 (d,  $J$  = 12.3 Hz, 2H), 1.88 (s, 3H), 1.83–1.89 (m, 4H), 1.80 (s, 3H), 1.69 (s, 1H), 1.51–1.60 (m, 3H), 1.36–1.50 (m, 5H), 1.35 (s, 1H), 1.22–1.31 (m, 3H), 1.18 (d,  $J$  = 2.6 Hz, 1H), 1.03–1.17 (m, 5H), 0.96 (s, 3H), 0.92 (d,  $J$  = 6.3 Hz, 3H), 0.65 (s, 3H). **<sup>13</sup>C NMR** (150 MHz, CDCl<sub>3</sub>)  $\delta$ = 172.97, 166.09, 149.26, 132.63, 130.90, 129.47, 128.20, 104.45, 86.61, 81.40, 74.96, 56.45, 56.04, 42.72, 41.93, 40.45, 40.12, 35.78, 35.46, 35.05, 34.61, 33.37, 32.33, 31.61, 30.16, 28.21, 27.02, 26.73, 26.30, 24.70, 24.15, 23.33, 20.94, 20.84, 18.36, 12.02. **IR** (KBr, cm<sup>-1</sup>): 3459, 2937, 1715, 1450, 1275, 1114, 713, 616. **HRMS-ESI**( $m/z$ ): [M+Na]<sup>+</sup> calcd. for C<sub>38</sub>H<sub>53</sub>NNaO<sub>3</sub>, 594.3918; found, 594.3927.

## General Procedure for 1, 4-functionalization of 1,3-Enynes

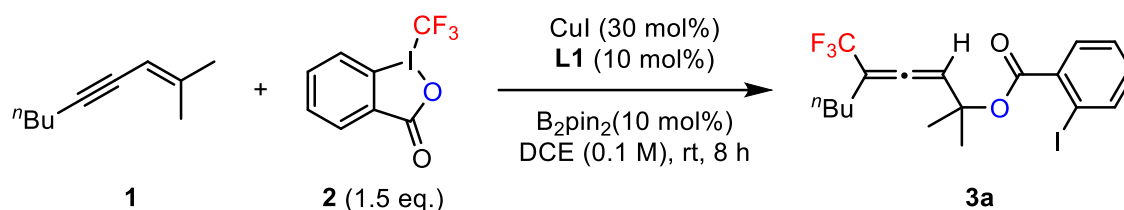

In an oven-dried 8 mL screwed-capped vial  $\text{B}_2\text{Pin}_2$  (2.5 mg, 0.01 mmol, 10 mol%), 6,6'-dibromo-2,2'-bipyridine (3.1 mg, 0.01 mmol, 10 mol%), **2** (47.4 mg, 0.15 mmol, 1.5 equiv.) were weighted. Then the vial was transferred into the glove-box, CuI (5.7 mg, 0.01 mmol, 30 mol%), **1a** (13.6 mg, 0.1 mmol, 1.0 equiv.) and anhydrous DCE (1.0 mL) were added to the vial. The vial was sealed and moved outside of the glove-box. The vial was kept at 25 °C about 8 hours. After the reaction completion monitored by TLC ( $R_f = 0.3$ , PE), the reaction was quenched by brine (2 mL), and extracted with EtOAc (5 mL  $\times$  2), the organic solvent was filtrated through a pad of short anhrdrous  $\text{Na}_2\text{SO}_4$  column. Evaporation and flash Silica gel column purification (petroleum as eluent) of the crude product provided **3a** (33.0 mg) in 73% isolated yield.

### 2-methyl-5-(trifluoromethyl)nona-3,4-dien-2-yl 2-iodobenzoate (**3a**)

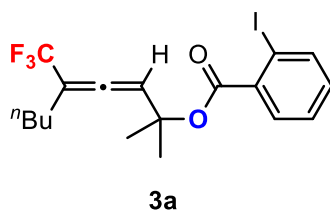

Colourless oil.  $^1\text{H NMR}$  (400 MHz,  $\text{CDCl}_3$ )  $\delta$  = 7.96 (d,  $J = 7.8$  Hz, 1H), 7.69 (dd,  $J = 7.8, 1.8$  Hz, 1H), 7.39 (t,  $J = 7.6$  Hz, 1H), 7.13 (dt,  $J = 7.8, 1.8$  Hz, 1H), 6.27–6.32 (m, 1H), 2.15–2.20 (m, 2H), 1.72 (s, 3H), 1.71 (s, 3H), 1.43–1.51 (m, 2H), 1.31–1.41 (m, 2H), 0.88 (t,  $J = 7.2$  Hz, 3H).  $^{13}\text{C NMR}$  (150 MHz,  $\text{CDCl}_3$ )  $\delta$  = 201.06 (q,  $J = 4.2$  Hz), 165.64, 141.08, 136.48, 132.28, 130.64, 127.88, 123.58 (q,  $J = 259.5$  Hz), 104.55, 102.67 (q,  $J = 33$  Hz), 93.49, 80.60, 29.46, 27.48, 26.71, 26.05, 22.20, 13.73.  $^{19}\text{F NMR}$

(376 MHz, CDCl<sub>3</sub>)  $\delta$  -64.16 (d,  $J$  = 3.3 Hz). **IR** (KBr, cm<sup>-1</sup>): 3456, 1727, 1292, 1118, 741. **HRMS-ESI**(m/z): [M+Na]<sup>+</sup> calcd. for C<sub>18</sub>H<sub>20</sub>F<sub>3</sub>INaO<sub>2</sub>, 475.0352; found, 475.0341.

**2-methyl-5-(trifluoromethyl)deca-3,4-dien-2-yl 2-iodobenzoate (3b)**

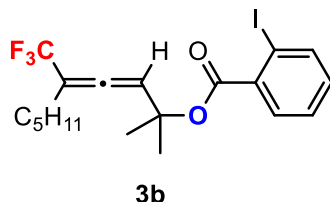

Colourless oil. **<sup>1</sup>H NMR** (600 MHz, CDCl<sub>3</sub>)  $\delta$  = 7.96 (d,  $J$  = 7.8 Hz, 1H), 7.69 (dd,  $J$  = 7.8, 1.5 Hz, 1H), 7.38 (t,  $J$  = 7.5 Hz, 1H), 7.13 (dt,  $J$  = 7.8, 1.5 Hz, 1H), 6.27–6.32 (m, 1H), 2.15–2.19 (m, 2H), 1.72 (s, 3H), 1.71 (s, 3H), 1.46–1.51 (m, 2H), 1.32–1.28 (m, 4H), 0.86 (t,  $J$  = 6.9 Hz, 3H). **<sup>13</sup>C NMR** (150 MHz, CDCl<sub>3</sub>)  $\delta$  = 201.04 (q,  $J$  = 4.2 Hz), 165.62, 141.07, 136.46, 132.28, 130.64, 127.86, 123.62 (q,  $J$  = 272 Hz), 104.53, 102.68 (q,  $J$  = 33 Hz), 93.49, 80.58, 31.25, 27.46, 27.02, 26.70, 26.30, 22.32, 13.94. **<sup>19</sup>F NMR** (376 MHz, CDCl<sub>3</sub>)  $\delta$  = -64.14 (d,  $J$  = 3.3 Hz). **IR** (KBr, cm<sup>-1</sup>): 3422, 1726, 1637, 1292, 1118, 740. **HRMS-ESI**(m/z): [M+Na]<sup>+</sup> calcd. for C<sub>19</sub>H<sub>22</sub>F<sub>3</sub>INaO<sub>2</sub>, 489.0509; found, 489.0500.

**2-methyl-5-(trifluoromethyl)undeca-3,4-dien-2-yl 2-iodobenzoate (3c)**

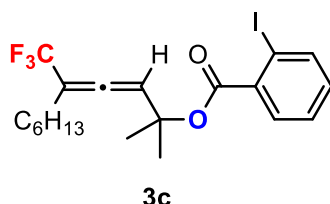

Colourless oil. **<sup>1</sup>H NMR** (600 MHz, CDCl<sub>3</sub>)  $\delta$  = 7.96 (d,  $J$  = 7.8 Hz, 1H), 7.69 (dd,  $J$  = 7.8, 1.5 Hz, 1H), 7.38 (t,  $J$  = 7.5 Hz, 1H), 7.12 (td,  $J$  = 7.8, 1.5 Hz, 1H), 6.29–6.31 (m, 1H), 2.15–2.19 (m, 2H), 1.72 (s, 3H), 1.71 (s, 3H), 1.49 (dt,  $J$  = 15.3, 7.8 Hz, 2H), 1.30–1.35 (m, 2H), 1.23–1.28 (m, 4H), 0.86 (t,  $J$  = 6.9 Hz, 3H). **<sup>13</sup>C NMR** (150 MHz, CDCl<sub>3</sub>)  $\delta$  = 201.03 (q,  $J$  = 4.2 Hz), 165.58, 141.07, 136.41, 132.28, 130.65, 127.86, 123.61 (q,  $J$  = 273.6 Hz), 104.52, 102.68 (q,  $J$  = 33.6 Hz), 93.51, 80.56, 31.49, 28.78, 27.44, 27.31, 26.70, 26.32, 22.53, 14.02. **<sup>19</sup>F NMR** (376 MHz, CDCl<sub>3</sub>)  $\delta$  = -64.14 (d,  $J$  = 3.3 Hz). **IR**

(KBr,  $\text{cm}^{-1}$ ): 3415, 2937, 1723, 1295, 1118, 743. **HRMS-ESI**( $m/z$ ):  $[\text{M}+\text{Na}]^+$  calcd. for  $\text{C}_{20}\text{H}_{24}\text{F}_3\text{INaO}_2$ , 503.0665; found, 503.0657.

**2,7-dimethyl-5-(trifluoromethyl)octa-3,4-dien-2-yl 2-iodobenzoate (3d)**

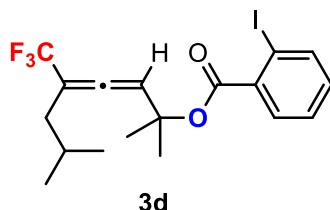

Colourless oil.  **$^1\text{H}$  NMR** (600 MHz,  $\text{CDCl}_3$ )  $\delta$  = 7.96 (d,  $J$  = 7.8 Hz, 1H), 7.68 (d,  $J$  = 7.8 Hz, 1H), 7.38 (t,  $J$  = 7.5 Hz, 1H), 7.13 (t,  $J$  = 7.8 Hz, 1H), 6.26–6.30 (m, 1H), 2.01–2.12 (m, 2H), 1.79–1.86 (m, 1H), 1.72 (s, 6H), 0.95 (s, 3H), 0.93 (s, 3H).  **$^{13}\text{C}$  NMR** (150 MHz,  $\text{CDCl}_3$ )  $\delta$  = 201.67 (q,  $J$  = 4.2 Hz), 165.67, 141.06, 136.50, 132.28, 130.60, 127.88, 123.65 (q,  $J$  = 273.6 Hz), 104.06, 101.38 (q,  $J$  = 33.6 Hz), 93.46, 80.65, 35.82, 27.53, 26.74, 26.73, 22.40, 22.38.  **$^{19}\text{F}$  NMR** (376 MHz,  $\text{CDCl}_3$ )  $\delta$  = -63.92 (d,  $J$  = 3.3 Hz). **IR** (KBr,  $\text{cm}^{-1}$ ): 3420, 1727, 1636, 1294, 1118, 742. **HRMS-ESI**( $m/z$ ):  $[\text{M}+\text{Na}]^+$  calcd. for  $\text{C}_{18}\text{H}_{20}\text{F}_3\text{INaO}_2$ , 475.0352; found, 475.0348.

**5-(cyclopentylmethyl)-6,6,6-trifluoro-2-methylhexa-3,4-dien-2-yl 2-iodobenzoate (3e)**

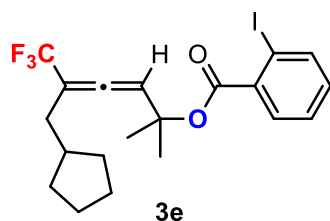

Colourless oil.  **$^1\text{H}$  NMR** (600 MHz,  $\text{CDCl}_3$ )  $\delta$  = 7.96 (d,  $J$  = 7.8 Hz, 1H), 7.68 (dd,  $J$  = 7.8, 1.5 Hz, 1H), 7.38 (t,  $J$  = 7.5 Hz, 1H), 7.13 (td,  $J$  = 7.8, 1.5 Hz, 1H), 6.30–6.36 (m, 1H), 2.53–2.58 (m, 1H), 1.87–1.98 (m, 2H), 1.71 (s, 6H), 1.66–1.71 (m, 2H), 1.56–1.61 (m, 2H), 1.43–1.49 (m, 2H), 1.27 (d,  $J$  = 18.4 Hz, 2H).  **$^{13}\text{C}$  NMR** (150 MHz,  $\text{CDCl}_3$ )  $\delta$  = 200.11 (q,  $J$  = 4.2 Hz), 165.69, 141.05, 136.53, 132.27, 130.61, 127.88, 123.80 (q,  $J$  = 271 Hz), 106.95 (q,  $J$  = 31.5 Hz), 105.15, 93.47, 80.63, 37.28, 32.52, 32.27, 27.50, 26.64, 24.88, 24.81.  **$^{19}\text{F}$  NMR** (376 MHz,  $\text{CDCl}_3$ )  $\delta$  = -62.73 (d,  $J$  = 3.3 Hz). **IR** (KBr,

cm<sup>-1</sup>): 3471, 1727, 1638, 1290, 1118, 741, 615. **HRMS-APCI**(m/z): [M+H]<sup>+</sup> calcd. for C<sub>20</sub>H<sub>23</sub>F<sub>3</sub>IO<sub>2</sub>, 479.0689; found, 479.0688.

**5-(cyclohexylmethyl)-6,6,6-trifluoro-2-methylhexa-3,4-dien-2-yl 2-iodobenzoate (3f)**

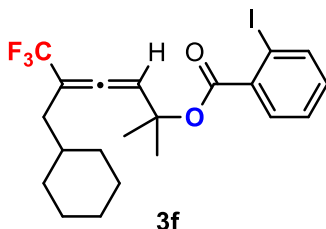

Colourless oil. **<sup>1</sup>H NMR** (600 MHz, CDCl<sub>3</sub>) δ= 7.96 (d, *J* = 7.8 Hz, 1H), 7.70 (d, *J* = 7.8 Hz, 1H), 7.39 (t, *J* = 7.5 Hz, 1H), 7.13 (t, *J* = 7.8 Hz, 1H), 6.24–6.28 (m, 1H), 2.02–2.09 (m, 2H), 1.75–1.80 (m, 2H), 1.72 (s, 6H), 1.64–1.68 (m, 2H), 1.59–1.60 (m, 1H), 1.47–1.55 (m, 1H), 1.10–1.21 (m, 3H), 0.87–0.95 (m, 2H). **<sup>13</sup>C NMR** (150 MHz, CDCl<sub>3</sub>) δ= 201.54 (q, *J* = 4.2 Hz), 165.56, 141.09, 136.39, 132.29, 130.68, 127.86, 123.65 (q, *J* = 272.2 Hz), 103.99, 100.89 (q, *J* = 33 Hz), 93.54, 80.62, 36.00, 34.28, 33.12, 33.07, 27.52, 26.71, 26.34, 26.00. **<sup>19</sup>F NMR** (376 MHz, CDCl<sub>3</sub>) δ= -64.24 (d, *J* = 3.2 Hz). **IR** (KBr, cm<sup>-1</sup>): 3417, 1722, 1627, 1293, 1116, 742, 613. **HRMS-ESI**(m/z): [M+Na]<sup>+</sup> calcd. for C<sub>21</sub>H<sub>24</sub>F<sub>3</sub>INaO<sub>2</sub>, 515.0665; found, 515.0658.

**2-methyl-7-phenyl-5-(trifluoromethyl)hepta-3,4-dien-2-yl 2-iodobenzoate (3g)**

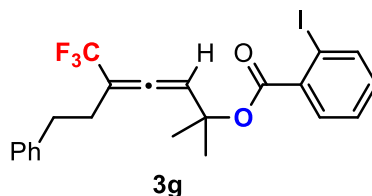

Colourless oil. **<sup>1</sup>H NMR** (600 MHz, CDCl<sub>3</sub>) δ= 7.95 (d, *J* = 7.8 Hz, 1H), 7.68 (dd, *J* = 7.8, 1.5 Hz, 1H), 7.37 (t, *J* = 7.5 Hz, 1H), 7.25–7.29 (m, 2H), 7.17–7.20 (m, 3H), 7.12 (td, *J* = 7.8, 1.5 Hz, 1H), 6.24–6.27 (m, 1H), 2.82 (t, *J* = 8.1 Hz, 2H), 2.48–2.56 (m, 2H), 1.67 (s, 6H). **<sup>13</sup>C NMR** (150 MHz, CDCl<sub>3</sub>) δ= 201.17 (q, *J* = 4.2 Hz), 165.61, 141.06, 140.53, 136.42, 132.31, 130.63, 128.43, 128.39, 127.89, 126.21, 123.51 (q, *J* = 271.5 Hz), 104.92, 101.89 (q, *J* = 33.0 Hz), 93.50, 80.44, 33.44, 27.98, 27.49, 26.52. **<sup>19</sup>F NMR** (376 MHz, CDCl<sub>3</sub>) δ= -63.98 (d, *J* = 3.2 Hz). **IR** (KBr, cm<sup>-1</sup>): 3451, 1726,

1636, 1294, 1117, 742. **HRMS-ESI**(m/z): [M+Na]<sup>+</sup> calcd. for C<sub>22</sub>H<sub>20</sub>F<sub>3</sub>INaO<sub>2</sub>, 523.0352; found, 523.0350.

**5-cyclopropyl-6,6,6-trifluoro-2-methylhexa-3,4-dien-2-yl 2-iodobenzoate (3h)**

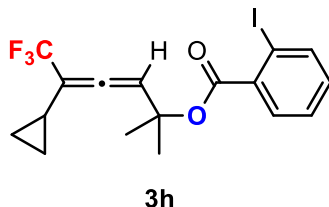

Colourless oil. **<sup>1</sup>H NMR** (600 MHz, CDCl<sub>3</sub>) δ= 7.95 (d, *J* = 7.8 Hz, 1H), 7.68 (d, *J* = 7.8 Hz, 1H), 7.39 (t, *J* = 7.5 Hz, 1H), 7.13 (t, *J* = 7.8 Hz, 1H), 6.29 (s, 1H), 1.68 (s, 6H), 1.35–1.41 (m, 1H), 0.82 (d, *J* = 8.1 Hz, 2H), 0.56–0.61 (m, 1H), 0.52–0.54 (m, 1H). **<sup>13</sup>C NMR** (150 MHz, CDCl<sub>3</sub>) δ= 199.57 (q, *J* = 4.2 Hz), 165.70, 141.02, 136.44, 132.31, 130.60, 127.90, 123.61 (q, *J* = 273 Hz), 106.11 (q, *J* = 34.5 Hz), 105.68, 93.45, 80.38, 27.61, 26.45, 7.16, 6.97, 6.53. **<sup>19</sup>F NMR** (376 MHz, CDCl<sub>3</sub>) δ= -63.87 (d, *J* = 3.3 Hz). **IR** (KBr, cm<sup>-1</sup>): 3452, 1638, 1288, 1120, 741. **HRMS-ESI**(m/z): [M+Na]<sup>+</sup> calcd. for C<sub>17</sub>H<sub>16</sub>INaO<sub>2</sub>, 459.0039; found, 459.0033.

**8-chloro-2-methyl-5-(trifluoromethyl)octa-3,4-dien-2-yl 2-iodobenzoate (3i)**

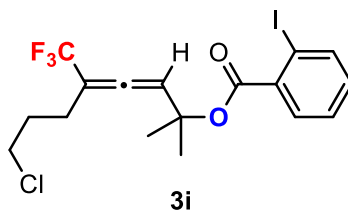

Colourless oil. **<sup>1</sup>H NMR** (600 MHz, CDCl<sub>3</sub>) δ= 7.96 (d, *J* = 7.8 Hz, 1H), 7.69 (dd, *J* = 7.8, 1.5 Hz, 1H), 7.39 (t, *J* = 7.5 Hz, 1H), 7.13 (td, *J* = 7.8, 1.5 Hz, 1H), 6.29–6.32 (m, 1H), 3.58 (dt, *J* = 6.3, 1.5 Hz, 2H), 2.36–2.39 (m, 2H), 2.00 (quint, *J* = 7.2 Hz, 2H), 1.72 (s, 6H). **<sup>13</sup>C NMR** (150 MHz, CDCl<sub>3</sub>) δ= 200.87 (q, *J* = 4.2 Hz), 165.64, 141.08, 136.34, 132.36, 130.61, 127.92, 123.36 (q, *J* = 273 Hz), 105.28, 101.49 (q, *J* = 33.6 Hz), 93.47, 80.30, 43.92, 30.10, 27.70, 26.46, 23.73. **<sup>19</sup>F NMR** (376 MHz, CDCl<sub>3</sub>) δ= -64.19 (d, *J* = 3.2 Hz). **IR** (KBr, cm<sup>-1</sup>): 3421, 2943, 1726, 1293, 1120, 743. **HRMS-ESI**(m/z): [M+Na]<sup>+</sup> calcd. for C<sub>17</sub>H<sub>17</sub>F<sub>3</sub>INaO<sub>2</sub>, 494.9806; found, 494.9804.

**5-((1,3-dioxoisindolin-2-yl) methyl)-6,6,6-trifluoro-2-methylhexa-3,4-dien-2-yl 2-iodobenzoate (3j)**

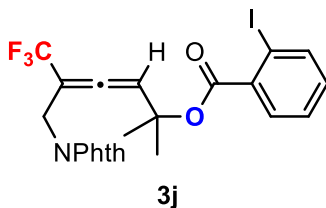

Yellow oil. **<sup>1</sup>H NMR** (600 MHz, CDCl<sub>3</sub>)  $\delta$ = 7.90 (d,  $J$  = 7.8 Hz, 1H), 7.80 (d,  $J$  = 5.4 Hz, 1H), 7.79 (d,  $J$  = 5.4 Hz, 1H), 7.64 (d,  $J$  = 5.4 Hz, 1H), 7.63 (d,  $J$  = 5.4 Hz, 1H), 7.54 (dd,  $J$  = 7.8, 1.5 Hz, 1H), 7.33 (t,  $J$  = 7.5 Hz, 1H), 7.10 (td,  $J$  = 7.8, 1.5 Hz, 1H), 6.41 (dd,  $J$  = 6.3, 3.0 Hz, 1H), 4.55 (dd,  $J$  = 15.9, 3.0 Hz, 1H), 4.45 (dd,  $J$  = 15.9, 3.0 Hz, 1H), 1.63 (s, 3H), 1.55 (s, 3H). **<sup>13</sup>C NMR** (150 MHz, CDCl<sub>3</sub>)  $\delta$ = 200.33 (q,  $J$  = 4.2 Hz), 167.20, 165.15, 141.06, 135.79, 134.08, 132.33, 131.81, 130.83, 127.77, 123.42, 122.43 (q,  $J$  = 273 Hz), 107.42, 99.03 (q,  $J$  = 34.5 Hz), 93.66, 80.07, 34.10, 27.02, 26.24. **<sup>19</sup>F NMR** (376 MHz, CDCl<sub>3</sub>)  $\delta$ = -63.13 (d,  $J$  = 3.1 Hz). **IR** (KBr, cm<sup>-1</sup>): 3416, 1722, 1391, 1292, 1123, 734. **HRMS-ESI**( $m/z$ ): [M+Na]<sup>+</sup> calcd. for C<sub>23</sub>H<sub>17</sub>F<sub>3</sub>INaO<sub>4</sub>, 578.0047; found, 578.0045.

**6,6,6-trifluoro-2-methyl-5-(((4-methylphenyl)sulfonamido)methyl)hexa-3,4-dien-2-yl 2-iodobenzoate (3k)**

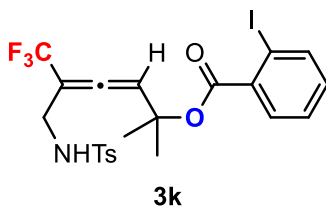

Yellow oil. **<sup>1</sup>H NMR** (600 MHz, CDCl<sub>3</sub>)  $\delta$ = 7.98 (d,  $J$  = 7.8 Hz, 1H), 7.76 (d,  $J$  = 7.5 Hz, 2H), 7.74 (dd,  $J$  = 7.8, 1.5 Hz, 1H), 7.42 (t,  $J$  = 7.5 Hz, 1H), 7.27 (d,  $J$  = 7.5 Hz, 2H), 7.16 (td,  $J$  = 7.8, 1.5 Hz, 1H), 5.86 (dd,  $J$  = 6.6, 3.3 Hz, 1H), 5.61 (dd,  $J$  = 8.1, 3.9 Hz, 1H), 3.94 (ddd,  $J$  = 10.8, 8.1, 3.3 Hz, 1H), 3.78 (dt,  $J$  = 15.8, 3.6 Hz, 1H), 2.42 (s, 3H), 1.66 (s, 3H), 1.65 (s, 3H). **<sup>13</sup>C NMR** (150 MHz, CDCl<sub>3</sub>)  $\delta$ = 200.63 (q,  $J$  = 4.2 Hz), 166.52, 143.65, 141.45, 137.52, 136.03, 132.97, 131.35, 129.89, 128.30, 127.44,

122.47 (q,  $J = 273$  Hz), 106.80, 100.35 (q,  $J = 34.5$  Hz), 93.84, 80.46, 39.54, 28.80, 25.53, 21.74.  $^{19}\text{F}$  NMR (376 MHz,  $\text{CDCl}_3$ )  $\delta = -63.42$  (d,  $J = 3.0$  Hz). IR (KBr,  $\text{cm}^{-1}$ ): 3416, 1717, 1295, 1161, 744. HRMS-ESI( $m/z$ ):  $[\text{M}+\text{Na}]^+$  calcd. for  $\text{C}_{22}\text{H}_{21}\text{F}_3\text{INaO}_4$ , 602.0080; found, 602.0079.

**5-(((tert-butoxycarbonyl)amino)methyl)-6,6,6-trifluoro-2-methylhexa-3,4-dien-2-yl-2-iodobenzoate (3l)**

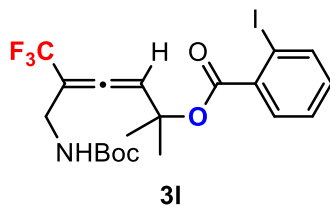

Yellow oil.  $^1\text{H}$  NMR (600 MHz,  $\text{CDCl}_3$ )  $\delta = 7.96$  (d,  $J = 7.8$  Hz, 1H), 7.71 (dd,  $J = 7.8$ , 1.5 Hz, 1H), 7.39 (t,  $J = 7.5$  Hz, 1H), 7.14 (dd,  $J = 7.8$ , 1.5 Hz, 1H), 6.30 (dd,  $J = 6.3$ , 3.0 Hz, 1H), 5.13 (brs, 1H), 4.00–4.03 (m, 1H), 3.92 (ddd,  $J = 10.5$ , 5.1, 3.3 Hz, 1H), 1.73 (s, 3H), 1.71 (s, 3H), 1.40 (s, 9H).  $^{13}\text{C}$  NMR (150 MHz,  $\text{CDCl}_3$ )  $\delta = 200.95$  (q,  $J = 3.9$  Hz), 166.05, 155.73, 141.30, 136.49, 132.64, 131.01, 128.12, 122.98 (q,  $J = 273$  Hz), 106.24, 101.53 (q,  $J = 33.0$  Hz), 93.71, 80.61, 79.92, 37.42, 28.51, 27.96, 26.48.  $^{19}\text{F}$  NMR (376 MHz,  $\text{CDCl}_3$ )  $\delta = -63.19$  (d,  $J = 2.3$  Hz). IR (KBr,  $\text{cm}^{-1}$ ): 3448, 1717, 1289, 1120, 742. HRMS-ESI( $m/z$ ):  $[\text{M}+\text{Na}]^+$  calcd. for  $\text{C}_{20}\text{H}_{23}\text{F}_3\text{INaO}_4$ , 548.0516; found, 548.0518.

**(5-(benzamidomethyl)-6,6,6-trifluoro-2-methylhexa-3,4-dien-2-yl-2-iodobenzoate (3m)**

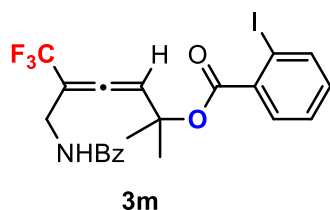

Yellow oil.  $^1\text{H}$  NMR (600 MHz,  $\text{CDCl}_3$ )  $\delta = 7.95$  (d,  $J = 7.8$  Hz, 1H), 7.84 (d,  $J = 7.8$  Hz, 2H), 7.58 (dd,  $J = 7.8$ , 1.5 Hz, 1H), 7.40 (t,  $J = 7.5$  Hz, 1H), 7.36 (t,  $J = 7.5$  Hz, 1H), 7.29 (t,  $J = 7.8$  Hz, 2H), 7.14 (td,  $J = 7.8$ , 1.5 Hz, 1H), 7.00 (brs, 1H), 6.17 (dd,  $J$



= 6.0, 3.0 Hz, 1H), 4.52 (ddd,  $J$  = 16.1, 6.9, 3.3 Hz, 1H), 4.14 (dt,  $J$  = 16.1, 7.5 Hz, 1H), 1.71 (s, 3H), 1.69 (s, 3H).  $^{13}\text{C}$  NMR (150 MHz,  $\text{CDCl}_3$ )  $\delta$  = 200.29 (q,  $J$  = 4.2 Hz), 167.35, 166.22, 141.15, 135.85, 133.87, 132.60, 131.46, 130.79, 128.38, 127.94, 127.21, 122.63 (q,  $J$  = 273.0 Hz), 106.11, 101.21 (q,  $J$  = 34.5 Hz), 93.58, 80.47, 35.87, 28.08, 26.20.  $^{19}\text{F}$  NMR (376 MHz,  $\text{CDCl}_3$ )  $\delta$  = -63.19 (d,  $J$  = 2.3 Hz). IR (KBr,  $\text{cm}^{-1}$ ): 3417, 1721, 1625, 1275, 1116, 615. HRMS-ESI( $m/z$ ):  $[\text{M}+\text{Na}]^+$  calcd. for  $\text{C}_{22}\text{H}_{19}\text{F}_3\text{INaO}_3$ , 552.0254; found, 552.0255.

**7-hydroxy-2-methyl-5-(trifluoromethyl)hepta-3,4-dien-2-yl 2-iodobenzoate (3n)**

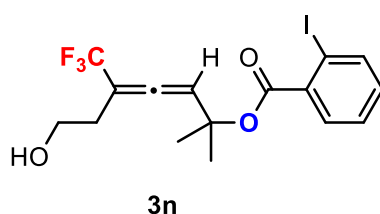

Colourless oil.  $^1\text{H}$  NMR (600 MHz,  $\text{CDCl}_3$ )  $\delta$  = 7.96 (d,  $J$  = 7.8 Hz, 1H), 7.71 (d,  $J$  = 7.2 Hz, 1H), 7.40 (t,  $J$  = 7.8 Hz, 1H), 7.15 (t,  $J$  = 7.2 Hz, 1H), 6.15–6.17 (m, 1H), 3.83–3.92 (m, 2H), 2.68 (brs, 1H), 2.41–2.54 (m, 2H), 1.74 (s, 3H), 1.68 (s, 3H).  $^{13}\text{C}$  NMR (150 MHz,  $\text{CDCl}_3$ )  $\delta$  = 200.63 (q,  $J$  = 4.2 Hz), 166.19, 141.17, 136.01, 132.60, 130.78, 127.98, 123.37 (q,  $J$  = 273.9 Hz), 105.13, 100.43 (q,  $J$  = 34.5 Hz), 93.64, 80.59, 59.66, 29.73, 28.84, 25.16.  $^{19}\text{F}$  NMR (376 MHz,  $\text{CDCl}_3$ )  $\delta$  = -64.51 (d,  $J$  = 3.2 Hz). IR (KBr,  $\text{cm}^{-1}$ ): 3420, 1638, 1293, 1118, 742. HRMS-ESI( $m/z$ ):  $[\text{M}+\text{Na}]^+$  calcd. for  $\text{C}_{16}\text{H}_{16}\text{F}_3\text{INaO}_3$ , 462.9988; found, 462.9992.

**9-hydroxy-2-methyl-5-(trifluoromethyl)nona-3,4-dien-2-yl 2-iodobenzoate (3o)**

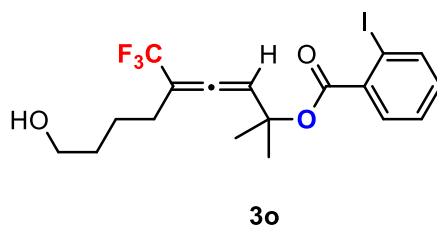

Colourless oil.  $^1\text{H}$  NMR (600 MHz,  $\text{CDCl}_3$ )  $\delta$  = 7.96 (d,  $J$  = 7.8 Hz, 1H), 7.69 (d,  $J$  = 7.5 Hz, 1H), 7.39 (t,  $J$  = 7.5 Hz, 1H), 7.13 (t,  $J$  = 7.8 Hz, 1H), 6.25 (dd,  $J$  = 6.3, 3.6 Hz, 1H), 3.60–3.66 (m, 2H), 2.18–2.19 (m, 2H), 1.71 (d,  $J$  = 8.7 Hz, 6H), 1.58–1.69 (m,

4H). **<sup>13</sup>C NMR** (150 MHz, CDCl<sub>3</sub>)  $\delta$ =200.92 (q,  $J$  = 3.6 Hz), 165.75, 141.07, 136.39, 132.34, 130.63, 127.90, 123.51 (q,  $J$  = 273.0 Hz), 104.90, 102.58 (q,  $J$  = 33.3 Hz), 93.45, 80.54, 62.43, 32.06, 27.94, 26.24, 26.07, 23.63. **<sup>19</sup>F NMR** (376 MHz, CDCl<sub>3</sub>)  $\delta$ = -63.90 (d,  $J$  = 3.3 Hz). **IR** (KBr, cm<sup>-1</sup>): 3454, 1636, 1117, 742. **HRMS-ESI**(m/z): [M+Na]<sup>+</sup> calcd. for C<sub>18</sub>H<sub>20</sub>F<sub>3</sub>INaO<sub>3</sub>, 491.0301; found, 491.0308.

**7-((boraneyl-d-t)oxy)-2-methyl-5-(trifluoromethyl)hepta-3,4-dien-2-yl-2-iodobenzoate (3p)**

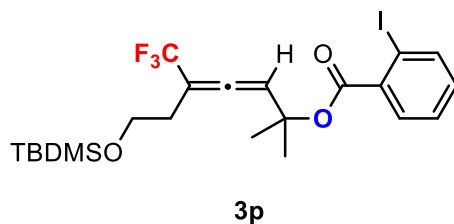

Colourless oil. **<sup>1</sup>H NMR** (600 MHz, CDCl<sub>3</sub>)  $\delta$ = 7.95 (d,  $J$  = 7.8 Hz, 1H), 7.67 (dd,  $J$  = 7.8, 1.5 Hz, 1H), 7.38 (t,  $J$  = 7.5 Hz, 1H), 7.12 (td,  $J$  = 7.8, 1.5 Hz, 1H), 6.28 (dd,  $J$  = 6.0, 3.0 Hz, 1H), 3.74 (t,  $J$  = 7.2 Hz, 2H), 2.40–2.43 (m, 2H), 1.71 (s, 6H), 0.87 (s, 9H), 0.04 (s, 3H), 0.03 (s, 3H). **<sup>13</sup>C NMR** (150 MHz, CDCl<sub>3</sub>)  $\delta$ = 201.51 (q,  $J$  = 4.2 Hz), 165.60, 141.06, 136.45, 132.29, 130.65, 127.87, 123.53 (q,  $J$  = 273.6 Hz), 104.41, 99.16 (q,  $J$  = 34.5 Hz), 93.50, 80.43, 60.97, 29.98, 27.47, 26.58, 25.85, 18.22, -5.35, -5.36. **<sup>19</sup>F NMR** (376 MHz, CDCl<sub>3</sub>)  $\delta$ = -64.11 (d,  $J$  = 3.3 Hz), -64.17 (d,  $J$  = 3.2 Hz). **IR** (KBr, cm<sup>-1</sup>): 3420, 2933, 1728, 1466, 1292, 1118, 840, 742. **HRMS-ESI**(m/z): [M+Na]<sup>+</sup> calcd. for C<sub>22</sub>H<sub>30</sub>F<sub>3</sub>INaO<sub>3</sub>Si, 577.0853; found, 577.0853.

**2-methyl-5-(trifluoromethyl)-7-((triisopropylsilyl)oxy)hepta-3,4-dien-2-yl-2-iodobenzoate (3q)**

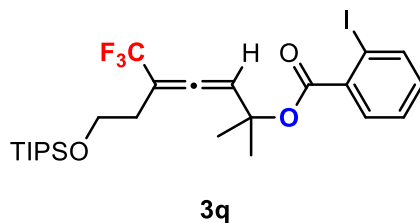

Colourless oil. **<sup>1</sup>H NMR** (600 MHz, CDCl<sub>3</sub>)  $\delta$ = 7.96 (d,  $J$  = 7.8 Hz, 1H), 7.69 (d,  $J$  = 7.5 Hz, 1H), 7.38 (t,  $J$  = 7.5 Hz, 1H), 7.13 (t,  $J$  = 7.8 Hz, 1H), 6.28 (dd,  $J$  = 6.3, 3.3 Hz,

1H), 3.81 (t,  $J = 7.2$  Hz, 2H), 2.40–2.51 (m, 2H), 1.71 (s, 6H), 1.03 (s, 18H), 0.97–1.12 (m, 3H).  $^{13}\text{C}$  NMR (150 MHz,  $\text{CDCl}_3$ )  $\delta$ = 201.45 (q,  $J = 4.2$  Hz), 165.54, 141.09, 136.37, 132.30, 130.69, 127.86, 123.45 (q,  $J = 273.6$  Hz), 104.38, 99.15 (q,  $J = 34.5$  Hz), 93.53, 80.41, 61.34, 30.03, 27.44, 26.60, 17.94, 11.93.  $^{19}\text{F}$  NMR (376 MHz,  $\text{CDCl}_3$ )  $\delta$ = -64.14 (d,  $J = 3.3$  Hz). IR (KBr,  $\text{cm}^{-1}$ ): 3416, 1623, 1115, 611. HRMS-ESI( $m/z$ ):  $[\text{M}+\text{Na}]^+$  calcd. for  $\text{C}_{25}\text{H}_{39}\text{F}_3\text{INaO}_3\text{Si}$ , 619.1323; found, 619.1325.

**2-methyl-7-((tetrahydro-2H-pyran-2-yl)oxy)-5-(trifluoromethyl)hepta-3,4-dien-2-yl 2-iodobenzoate (3r)**

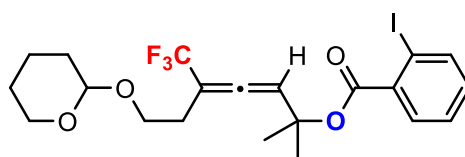

**3r**, dr = 1:1

Colourless oil, mixture of isomer (1:1).  $^1\text{H}$  NMR (600 MHz,  $\text{CDCl}_3$ )  $\delta$ = 7.95 (d,  $J = 7.5$  Hz, 1H), 7.68 (dt,  $J = 7.8, 1.8$  Hz, 1H), 7.38 (t,  $J = 7.5$  Hz, 1H), 7.12 (td,  $J = 7.8, 1.5$  Hz, 1H), 6.31–6.33 (m, 1H), 4.58 (t,  $J = 3.9$  Hz, 1H), 3.85–3.88 (m, 1H), 3.81–3.84 (m, 1H), 3.54–3.58 (m, 1H), 3.45–3.49 (m, 1H), 2.49–2.53 (m, 2H), 1.75–1.83 (m, 1H), 1.72 (s, 6H), 1.65–1.68 (m, 1H), 1.51–1.58 (m, 2H), 1.46–1.49 (m, 2H).  $^{13}\text{C}$  NMR (150 MHz,  $\text{CDCl}_3$ )  $\delta$ = 201.55 (q,  $J = 4.2$  Hz), 165.69, 141.03, 136.52, 132.27, 130.63, 127.87, 123.43 (q,  $J = 273.6$  Hz), 104.64, 99.55 (q,  $J = 15.0$  Hz), 98.93, 93.46, 80.53, 64.81, 62.36, 30.62, 27.39, 27.08, 26.58, 25.40, 19.52.  $^{19}\text{F}$  NMR (376 MHz,  $\text{CDCl}_3$ )  $\delta$ = -64.08 (d,  $J = 3.3$  Hz), -64.17 (d,  $J = 3.2$  Hz). IR (KBr,  $\text{cm}^{-1}$ ): 3418, 1725, 1626, 1293, 1119, 743. HRMS-ESI( $m/z$ ):  $[\text{M}+\text{Na}]^+$  calcd. for  $\text{C}_{21}\text{H}_{24}\text{F}_3\text{INaO}_4$ , 547.0564; found, 547.0566.

**2-methyl-7-(pivaloyloxy)-5-(trifluoromethyl)hepta-3,4-dien-2-yl-2-iodobenzoate (3s)**

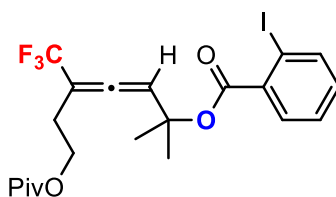

**3s**

Colourless oil.  $^1\text{H NMR}$  (600 MHz,  $\text{CDCl}_3$ )  $\delta$ = 7.95 (d,  $J$  = 7.8 Hz, 1H), 7.68 (d,  $J$  = 7.5 Hz, 1H), 7.40 (t,  $J$  = 7.5 Hz, 1H), 7.14 (t,  $J$  = 7.8 Hz, 1H), 6.33–6.36 (m, 1H), 4.17–4.26 (m, 2H), 2.52–2.56 (m, 2H), 1.72 (s, 6H), 1.18 (s, 9H).  $^{13}\text{C NMR}$  (150 MHz,  $\text{CDCl}_3$ )  $\delta$ = 201.24 (q,  $J$  = 4.2 Hz), 178.28, 165.71, 141.01, 136.33, 132.35, 130.64, 127.91, 123.19 (q,  $J$  = 273.0 Hz), 105.25, 98.95 (q,  $J$  = 34.5 Hz), 93.45, 80.22, 61.58, 38.67, 27.52, 27.11, 26.52, 25.89.  $^{19}\text{F NMR}$  (376 MHz,  $\text{CDCl}_3$ )  $\delta$ = -64.25 (d,  $J$  = 3.3 Hz). **IR** (KBr,  $\text{cm}^{-1}$ ): 3450, 1727, 1636, 1119. **HRMS-ESI**( $m/z$ ):  $[\text{M}+\text{Na}]^+$  calcd. for  $\text{C}_{21}\text{H}_{24}\text{F}_3\text{INaO}_4$ , 547.0564; found, 547.0567.

**2-methyl-7-(tosyloxy)-5-(trifluoromethyl)hepta-3,4-dien-2-yl-2-iodobenzoate (3t)**

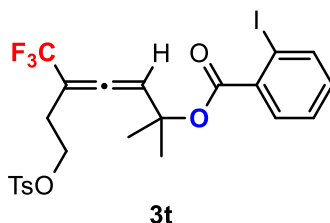

Colourless oil.  $^1\text{H NMR}$  (400 MHz,  $\text{CDCl}_3$ )  $\delta$ = 7.96 (dd,  $J$  = 7.8, 1.2 Hz, 1H), 7.77 (d,  $J$  = 8.4 Hz, 2H), 7.68 (dd,  $J$  = 7.8, 1.5 Hz, 1H), 7.40 (dd,  $J$  = 7.8, 1.2 Hz, 1H), 7.31 (d,  $J$  = 8.4 Hz, 2H), 7.14 (dt,  $J$  = 7.8, 1.5 Hz, 1H), 6.27 (dd,  $J$  = 6.3, 3.1 Hz, 1H), 4.20 (t,  $J$  = 6.6 Hz, 2H), 2.54–2.59 (m, 2H), 2.42 (s, 3H), 1.69 (s, 3H), 1.68 (s, 3H).  $^{13}\text{C NMR}$  (150 MHz,  $\text{CDCl}_3$ )  $\delta$ = 201.28 (q,  $J$  = 4.2 Hz), 165.62, 144.95, 141.05, 136.25, 132.79, 132.42, 130.69, 129.90, 127.96, 127.95, 122.97 (q,  $J$  = 273.6 Hz), 105.59, 97.67 (q,  $J$  = 35.4 Hz), 93.50, 80.12, 66.95, 27.56, 26.38, 26.31, 21.65.  $^{19}\text{F NMR}$  (376 MHz,  $\text{CDCl}_3$ )  $\delta$ = -64.23 (d,  $J$  = 3.1 Hz). **IR** (KBr,  $\text{cm}^{-1}$ ): 3452, 1637, 1119, 745. **HRMS-ESI**( $m/z$ ):  $[\text{M}+\text{Na}]^+$  calcd. for  $\text{C}_{23}\text{H}_{22}\text{F}_3\text{INaO}_5\text{S}$ , 617.0077; found, 617.0075.

**7-(benzyloxy)-2-methyl-5-(trifluoromethyl)hepta-3,4-dien-2-yl-2-iodobenzoate (3u)**

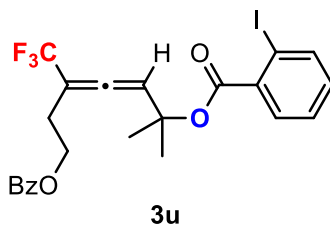

Colourless oil. **<sup>1</sup>H NMR** (600 MHz, CDCl<sub>3</sub>)  $\delta$ = 7.99–8.01 (m, 2H), 7.93 (d,  $J$  = 7.8 Hz, 1H), 7.65 (dd,  $J$  = 7.8, 1.5 Hz, 1H), 7.55 (t,  $J$  = 7.5 Hz, 1H), 7.41 (t,  $J$  = 7.8 Hz, 2H), 7.37 (t,  $J$  = 7.5, 1.2 Hz, 1H), 7.11 (dt,  $J$  = 7.8, 1.5 Hz, 1H), 6.34 (dd,  $J$  = 6.3, 3.0 Hz, 1H), 4.49 (td,  $J$  = 6.6, 2.4 Hz, 2H), 2.66–2.74 (m, 2H), 1.69 (s, 3H), 1.68 (s, 3H). **<sup>13</sup>C NMR** (150 MHz, CDCl<sub>3</sub>)  $\delta$ = 201.43 (q,  $J$  = 4.2 Hz), 166.30, 165.68, 141.02, 136.42, 133.05, 132.30, 130.63, 129.94, 129.61, 128.37, 127.89, 123.29 (q,  $J$  = 273.6 Hz), 105.36, 98.97 (q,  $J$  = 34.8 Hz), 93.45, 80.24, 62.20, 27.48, 26.48, 26.09. **<sup>19</sup>F NMR** (376 MHz, CDCl<sub>3</sub>)  $\delta$ = -64.19 (d,  $J$  = 3.1 Hz). **IR** (KBr, cm<sup>-1</sup>): 3420, 1722, 1633, 1275, 1117, 711. **HRMS-ESI**( $m/z$ ): [M+Na]<sup>+</sup> calcd. for C<sub>23</sub>H<sub>20</sub>F<sub>3</sub>INaO<sub>4</sub>, 567.0251; found, 567.0255.

**1-(3-(trifluoromethyl) hepta-1,2-dien-1-yl)cyclohexyl-2-iodobenzoate (3v)**

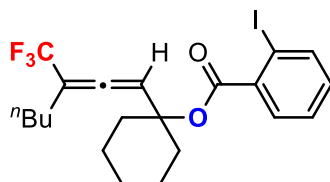

**3v**

Colourless oil. **<sup>1</sup>H NMR** (600 MHz, CDCl<sub>3</sub>)  $\delta$ = 7.97 (d,  $J$  = 7.8 Hz, 1H), 7.74 (dd,  $J$  = 7.8, 1.5 Hz, 1H), 7.39 (t,  $J$  = 7.5 Hz, 1H), 7.13 (td,  $J$  = 7.8, 1.5 Hz, 1H), 6.29–6.32 (m, 1H), 2.30–2.36 (m, 2H), 2.14–2.18 (m, 2H), 1.76–1.81 (m, 2H), 1.63–1.67 (m, 2H), 1.57–1.62 (m, 3H), 1.43–1.47 (m, 2H), 1.32–1.37 (m, 3H), 0.86 (t,  $J$  = 7.2 Hz, 3H). **<sup>13</sup>C NMR** (150 MHz, CDCl<sub>3</sub>)  $\delta$ = 201.83 (q,  $J$  = 4.2 Hz), 165.31, 141.24, 136.25, 132.31, 130.65, 127.88, 123.72 (q,  $J$  = 271.5 Hz), 103.64, 102.41 (q,  $J$  = 33.3 Hz), 93.68, 82.25, 35.83, 35.02, 29.49, 26.09, 25.15, 22.23, 22.14, 22.06, 13.72. **<sup>19</sup>F NMR** (376 MHz, CDCl<sub>3</sub>)  $\delta$ = -63.89 (d,  $J$  = 3.3 Hz). **IR** (KBr, cm<sup>-1</sup>): 3460, 2935, 1726, 1292, 1120, 741. **HRMS-ESI**( $m/z$ ): [M+Na]<sup>+</sup> calcd. for C<sub>21</sub>H<sub>24</sub>F<sub>3</sub>INaO<sub>2</sub>, 515.0665; found, 515.0666.

**tert-butyl-4-((2-iodobenzoyl)oxy)-4-(3-(trifluoromethyl)hepta-1,2-dien-1-yl)piperidine-1-carboxylate (3w)**

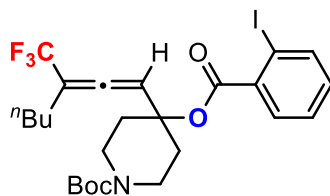

**3w**

Colourless oil. **<sup>1</sup>H NMR** (600 MHz, CDCl<sub>3</sub>)  $\delta$  = 7.98 (dd,  $J$  = 7.8, 0.6 Hz, 1H), 7.71 (dd,  $J$  = 7.8, 1.5 Hz, 1H), 7.40 (td,  $J$  = 7.8, 0.9 Hz, 1H), 7.15 (td,  $J$  = 7.8, 1.5 Hz, 1H), 6.31–6.34 (m, 1H), 3.67–3.85 (m, 2H), 3.31–3.36 (m, 2H), 2.32–2.44 (m, 2H), 2.12–2.21 (m, 2H), 1.83–1.97 (m, 2H), 1.42–1.48 (m, 2H), 1.46 (s, 9H), 1.30–1.39 (m, 2H), 0.86 (t,  $J$  = 7.2 Hz, 3H). **<sup>13</sup>C NMR** (150 MHz, CDCl<sub>3</sub>)  $\delta$  = 201.84 (q,  $J$  = 5.1 Hz), 165.26, 154.70, 141.29, 135.76, 132.58, 130.64, 127.94, 123.48 (q,  $J$  = 274.4 Hz), 103.38, 103.26 (q,  $J$  = 34.5 Hz), 103.15, 102.53, 93.60, 79.85, 35.12, 34.36, 29.41, 28.38, 26.01, 22.17, 13.66. **<sup>19</sup>F NMR** (376 MHz, CDCl<sub>3</sub>)  $\delta$  = -63.92 (d,  $J$  = 3.1 Hz). **IR** (KBr, cm<sup>-1</sup>): 3466, 1729, 1697, 1423, 1289, 1123, 741. **HRMS-ESI**( $m/z$ ): [M+Na]<sup>+</sup> calcd. for C<sub>25</sub>H<sub>31</sub>F<sub>3</sub>INaO<sub>2</sub>, 616.1142; found, 616.1134.

**3-methyl-1-phenyl-6-(trifluoromethyl)deca-4,5-dien-3-yl-2-iodobenzoate (3x)**

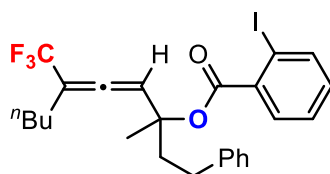

**3x**, dr = 1:1

Colourless oil. **<sup>1</sup>H NMR** (600 MHz, CDCl<sub>3</sub>) isomer  $\delta$  = 7.97 (d,  $J$  = 7.8 Hz, 1H×2), 7.68–7.70 (m, 1H×2), 7.38 (td,  $J$  = 7.5 2.4 Hz, 1H×2), 7.27 (t,  $J$  = 7.5 Hz, 2H×2), 7.20 (d,  $J$  = 8.1 Hz, 2H×2), 7.18 (t,  $J$  = 7.2 Hz, 1H×2), 7.13 (d,  $J$  = 7.5 Hz, 1H×2), 6.22–6.24 (m, 1H×2), 2.76 (t,  $J$  = 8.7 Hz, 2H×2), 2.32–2.38 (m, 2H×2), 2.17–2.21 (m, 2H×2), 1.77 (d,  $J$  = 7.8 Hz, 3H×2), 1.51 (t,  $J$  = 7.5 Hz, 1H×2), 1.46 (t,  $J$  = 7.5 Hz, 1H×2), 1.33–1.39 (m, 2H×2), 0.84–0.90 (m, 3H×2). **<sup>13</sup>C NMR** (150 MHz, CDCl<sub>3</sub>)  $\delta$  = 201.13 (q,  $J$  = 4.2 Hz), 201.07 (q,  $J$  = 4.2 Hz), 165.48, 165.35, 141.34, 141.32, 141.19, 141.14, 136.30, 136.09, 132.41, 132.37, 130.73, 130.65, 128.47 (C×2), 128.38, 128.36, 127.89 (C×2),

126.02 (C×2), 123.67 (q,  $J = 271.8$  Hz), 123.65 (q,  $J = 271.8$  Hz), 103.87, 103.85, 102.76 (q,  $J = 33.0$  Hz), 102.74 (q,  $J = 33.0$  Hz), 93.64, 93.57, 82.82, 82.72, 42.30, 41.58, 30.35, 30.32, 29.49, 29.48, 26.15, 26.13, 24.82, 24.16, 22.21, 22.17, 13.73, 13.69. **IR** (KBr,  $\text{cm}^{-1}$ ): 3422, 1727, 1631, 1290, 1121, 741. **HRMS-ESI**( $m/z$ ):  $[\text{M}+\text{Na}]^+$  calcd. for  $\text{C}_{25}\text{H}_{26}\text{F}_3\text{INaO}_2$ , 565.0822; found, 565.0816.

**5-(((4-((10S,13R,14S)-3-(benzoyloxy)-10,13-dimethylhexadecahydro-1H-cyclopenta[a]phenanthren-17-yl) pentanamido)methyl)-6,6,6-trifluoro-2-methylhexa-3,4-dien-2-yl-2-iodobenzoate (3y)**

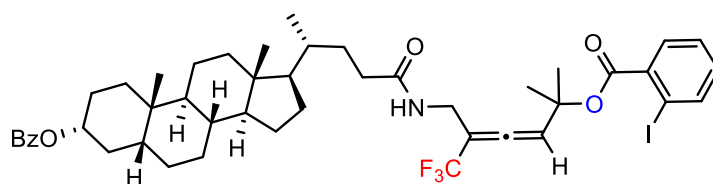

**3y**, dr = 1:1

White foam.  **$^1\text{H}$  NMR** (600 MHz,  $\text{CDCl}_3$ )  $\delta$ = 8.05 (d,  $J = 6.9$  Hz, 2H), 7.99 (d,  $J = 6.9$  Hz, 1H), 7.71 (d,  $J = 7.2$  Hz, 1H), 7.53 (d,  $J = 6.9$  Hz, 1H), 7.41–7.44 (m, 3H), 7.18 (t,  $J = 7.2$  Hz, 1H), 6.46 (s, 1H), 6.15 (s, 1H), 4.31 (d,  $J = 12$  Hz, 1H), 3.96 (d,  $J = 14.1$  Hz, 1H), 3.61–3.67 (m, 1H), 2.27–2.38 (m, 1H), 2.13–2.22 (m, 1H), 1.94–2.22 (m, 1H), 1.81–1.91 (m, 6H), 1.72 (s, 3H), 1.69 (s, 3H), 1.45–1.60 (m, 4H), 1.31–1.43 (m, 6H), 1.16–1.30 (m, 2H), 1.02–1.15 (m, 4H), 0.95 (s, 6H), 0.83 (t,  $J = 5.4$  Hz, 3H), 0.58 (d,  $J = 5.2$  Hz, 3H).  **$^{13}\text{C}$  NMR** (150 MHz,  $\text{CDCl}_3$ )  $\delta$ = 199.63 (q,  $J = 3.3$  Hz, C×2), 174.06, 174.01, 166.26 (C×2), 166.11 (C×2), 141.22 (C×2), 135.98 (C×2), 132.67 (C×2), 130.92 (C×2), 130.73 (C×2), 129.48 (C×2), 128.24 (C×2), 128.02 (C×2), 122.48 (q,  $J = 273.6$  Hz, C×2), 106.72 (C×2), 101.42 (q,  $J = 34.2$  Hz, C×2), 93.56 (C×2), 80.38 (C×2), 74.99 (C×2), 56.40, 56.37, 55.89, 55.76, 42.67, 42.66, 41.95, 40.45, 40.44, 40.07, 35.77, 35.54, 35.47, 35.37, 35.07, 34.63, 33.16, 32.99, 32.38, 31.73, 31.70, 28.90, 28.86, 28.15, 27.04, 26.78, 26.31, 25.04, 24.97, 24.15, 23.33, 20.84, 18.33, 12.01.  **$^{19}\text{F}$  NMR** (376 MHz, DMSO)  $\delta$ = -61.72 (d,  $J = 3.4$  Hz), -61.75 (d,  $J = 3.4$  Hz). **IR** (KBr,

cm<sup>-1</sup>): 3415, 2936, 1716, 1654, 1278, 1118, 712. **HRMS-ESI**(m/z): [M+Na]<sup>+</sup> calcd. for C<sub>46</sub>H<sub>57</sub>F<sub>3</sub>INaO<sub>4</sub>, 910.3126; found, 910.3143.

## Late-stage functionalization of allene compounds

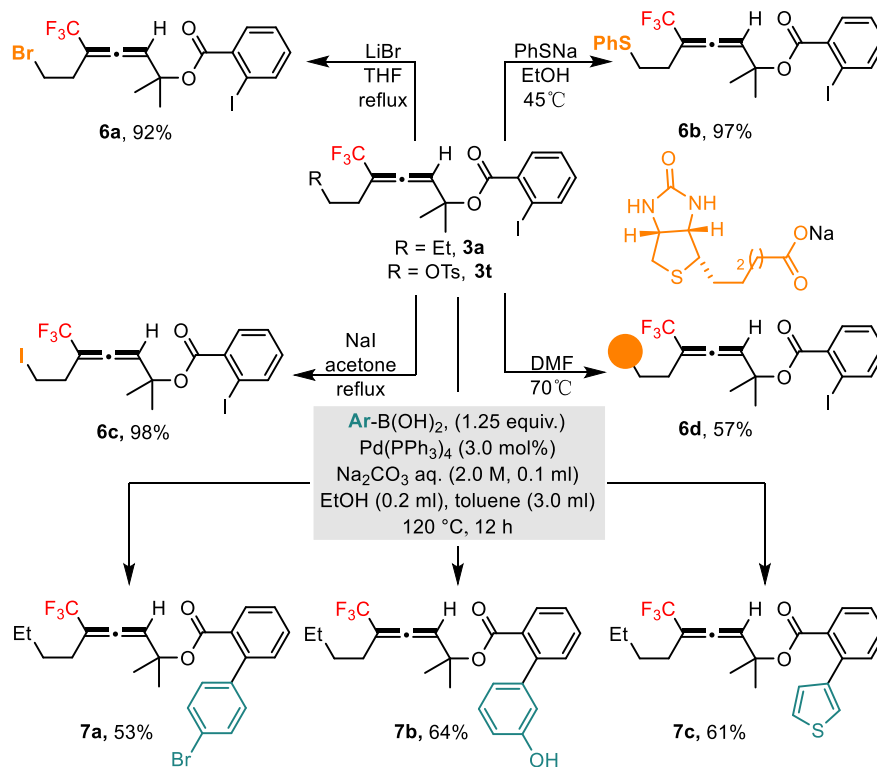

### 7-bromo-2-methyl-5-(trifluoromethyl)hepta-3,4-dien-2-yl-2-iodobenzoate (6a)

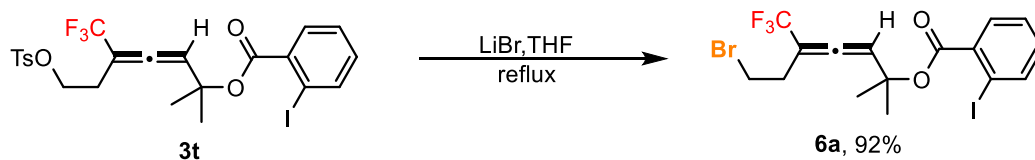

A 8 mL vial was charged with **3t** (30.4 mg, 0.05 mmol, 1 equiv.), LiBr (18.0 mg, 4 equiv.) and THF (0.5 mL). The vial was sealed with a PTFE lined cap and heated to reflux for 72 hours. Then cool to room temperature. The solvent was removed in vacuo and the residue was further purified with flash column chromatography (PE: DCM: EA = 30: 3: 1) to give the titled compound **6a** as colorless oil (23.1 mg, 92%). <sup>1</sup>H NMR (600 MHz, CDCl<sub>3</sub>) δ= 7.96 (d, *J* = 7.8 Hz, 1H), 7.69 (d, *J* = 7.8 Hz, 1H), 7.40 (t, *J* = 7.5 Hz, 1H), 7.14 (t, *J* = 7.5 Hz, 1H), 6.35–6.37 (m, 1H), 3.51 (t, *J* = 7.2 Hz, 2H), 2.69–2.85 (m, 2H), 1.74 (s, 3H), 1.73 (s, 3H). <sup>13</sup>C NMR (150 MHz, CDCl<sub>3</sub>) δ= 201.25 (q, *J*



= 4.2 Hz), 165.68, 141.07, 136.21, 132.41, 130.63, 127.92, 123.05 (q,  $J = 273.6$  Hz), 105.82, 100.16 (q,  $J = 33.6$  Hz), 93.52, 80.18, 29.94, 28.60, 27.73, 26.44.  $^{19}\text{F}$  NMR (376 MHz,  $\text{CDCl}_3$ )  $\delta = -64.27$  (d,  $J = 3.3$  Hz). IR (KBr,  $\text{cm}^{-1}$ ): 3415, 1622, 1399, 1118, 617. HRMS-ESI( $m/z$ ):  $[\text{M}+\text{Na}]^+$  calcd. for  $\text{C}_{16}\text{H}_{15}\text{BrF}_3\text{INaO}_2$ , 524.9144; found, 524.9157.

**2-methyl-7-(phenylthio)-5-(trifluoromethyl)hepta-3,4-dien-2-yl-2-iodobenzoate (6b)**

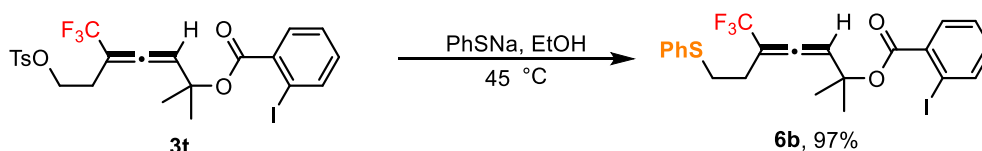

A 8 mL vial was charged with **3t** (30.4 mg, 0.05 mmol, 1 equiv.) and PhSNa (20.1 mg, 0.15 mmol, 3 equiv.) in EtOH 1mL. The reaction was stirred at 45 °C for another 16 hours. The vial was allowed to cool to room temperature. The solvent was then removed in vacuo and the residue was further purified with flash column chromatography (hexane: ethyl acetate: DCM = 10: 1: 3) to give the titled compound **6b** as colorless oil (25.8 mg, 97%).  $^1\text{H}$  NMR (600 MHz,  $\text{CDCl}_3$ )  $\delta = 7.96$  (d,  $J = 7.9$  Hz, 1H), 7.68 (d,  $J = 7.7$  Hz, 1H), 7.38 (t,  $J = 7.5$  Hz, 1H), 7.34 (d,  $J = 7.6$  Hz, 2H), 7.27 (d,  $J = 7.7$  Hz, 2H), 7.18 (t,  $J = 7.2$  Hz, 1H), 7.13 (t,  $J = 7.6$  Hz, 1H), 6.33 (d,  $J = 2.6$  Hz, 1H), 3.08 (t,  $J = 7.6$  Hz, 2H), 2.51 (dd,  $J = 14.5, 7.0$  Hz, 2H), 1.73 (s, 6H).  $^{13}\text{C}$  NMR (100 MHz,  $\text{CDCl}_3$ )  $\delta = 201.11$  (q,  $J = 3.5$  Hz), 165.63, 141.07, 138.29, 132.36, 130.85, 129.57, 129.01, 127.90, 128.30, 124.59 (q,  $J = 544.2$  Hz), 105.53, 101.08 (q,  $J = 34.6$  Hz), 99.96, 93.55, 80.30, 31.35, 29.69, 27.75, 26.44.  $^{19}\text{F}$  NMR (376 MHz,  $\text{CDCl}_3$ )  $\delta = -64.07$  (d,  $J = 3.3$  Hz). IR (KBr,  $\text{cm}^{-1}$ ): 3419, 1725, 1635, 1293, 1116, 743. HRMS-ESI( $m/z$ ):  $[\text{M}+\text{Na}]^+$  calcd. for  $\text{C}_{22}\text{H}_{20}\text{F}_3\text{INaO}_2$ , 555.0073; found, 555.0090.

**7-iodo-2-methyl-5-(trifluoromethyl)hepta-3,4-dien-2-yl-2-iodobenzoate (6c)**

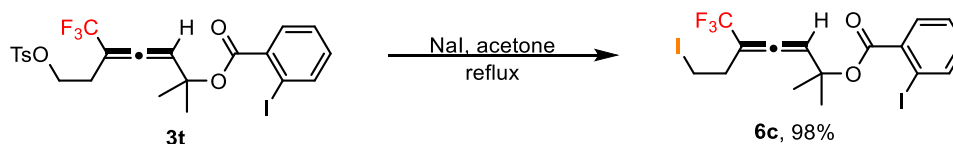

A 8 mL vial was charged with **3t** (30.4 mg, 0.05 mmol, 1equiv.), NaI (30 mg, 4 equiv.) and acetone (1 mL). The vial was sealed with a PTFE lined cap and heated to reflux for

18 hours. Then cool to room temperature. The solvent was then removed in vacuo and the residue was further purified with flash column chromatography (PE: DCM: EA = 30: 3: 1) to give the titled compound **6c** as yellowish oil (26.9 mg, 98%). **<sup>1</sup>H NMR** (400 MHz, CDCl<sub>3</sub>)  $\delta$ = 7.96 (d,  $J$  = 7.8 Hz, 1H), 7.69 (d,  $J$  = 7.8 Hz, 1H), 7.40 (t,  $J$  = 7.5 Hz, 1H), 7.14 (t,  $J$  = 7.5 Hz, 1H), 6.35 (s, 1H), 3.21–3.34 (m, 2H), 2.65–2.91 (m, 2H), 1.74 (s, 6H). **<sup>13</sup>C NMR** (100 MHz, CDCl<sub>3</sub>)  $\delta$ = 201.16 (q,  $J$  = 4.1 Hz), 165.66, 141.08, 136.23, 132.40, 130.63, 127.93, 121.11 (q,  $J$  = 445.8 Hz), 106.08, 101.94 (q,  $J$  = 34.8 Hz), 93.55, 80.13, 30.76, 29.69, 27.81, 26.47. **<sup>19</sup>F NMR** (376 MHz, CDCl<sub>3</sub>)  $\delta$ = -64.01 (s). **IR** (KBr, cm<sup>-1</sup>): 3418, 1724, 1629, 1291, 1117, 742. **HRMS-ESI**( $m/z$ ): [M+Na]<sup>+</sup> calcd. for C<sub>16</sub>H<sub>15</sub>F<sub>3</sub>I<sub>2</sub>NaO<sub>2</sub>, 572.9006; found, 572.9023.

**2-methyl-7-((5-((3aR,4R,6aS)-2-oxohexahydro-1H-thieno[3,4-d]imidazol-4-yl)pentanoyl)oxy)-5-(trifluoromethyl)hepta-3,4-dien-2-yl-2-iodobenzoate (**6d**)**

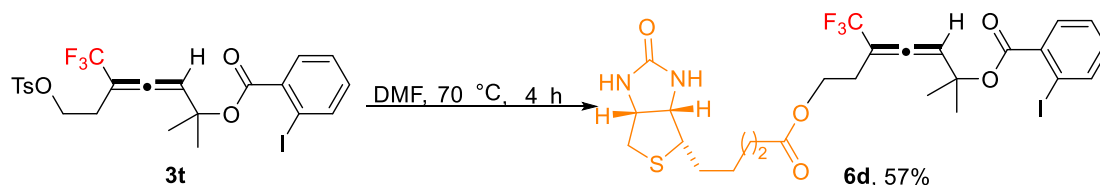

Biotin was treated with 1 M NaOH aqueous until dissolution, then solvent was then removed in vacuo to afford **4**. A 8 mL vial was charged with **3t** (15.2 mg, 0.025 mmol, 1 equiv.), **4** (13.4 mg, 2 equiv.) and DMF (0.5 mL). The vial was sealed with a PTFE lined cap and heated to 100 °C for 4 hours. The vial was allowed to cool to room temperature. The solvent was then removed in vacuo and the residue was further purified with flash column chromatography (DCM: CH<sub>3</sub>OH = 50: 1) to give the titled compound as colorless oil (17.4 mg, 57%). **<sup>1</sup>H NMR** (400 MHz, CDCl<sub>3</sub>)  $\delta$ = 7.95 (d,  $J$  = 7.9 Hz, 1H), 7.68 (d,  $J$  = 7.7 Hz, 1H), 7.40 (t,  $J$  = 7.5 Hz, 1H), 7.14 (t,  $J$  = 7.6 Hz, 1H), 6.35 (s, 1H), 5.78 (s, 1H), 5.40 (s, 1H), 4.49 (s, 1H), 4.16–4.34 (m, 3H), 3.14 (s, 1H), 2.85–2.95 (m, 1H), 2.72 (d,  $J$  = 12.8 Hz, 1H), 2.55 (s, 2H), 2.30 (t,  $J$  = 7.2 Hz, 2H), 1.72 (s, 6H), 1.66 (dd,  $J$  = 19.3, 7.5 Hz, 4H), 1.42 (d,  $J$  = 6.0 Hz, 2H). **<sup>13</sup>C NMR** (100 MHz, CDCl<sub>3</sub>)  $\delta$ = 201.27 (q,  $J$  = 4.1 Hz), 173.30, 165.73, 163.50, 140.98, 136.37, 132.37, 130.60, 127.94, 123.18 (q,  $J$  = 273.6 Hz), 105.20, 98.82 (q,  $J$  = 34.5 Hz), 93.43,

80.23, 61.91, 61.46, 60.06, 55.34, 40.52, 33.71, 28.31, 28.22, 27.54, 26.43, 25.92, 24.64. <sup>19</sup>F NMR (376 MHz, CDCl<sub>3</sub>) δ= -64.20 (d, *J* = 10.4 Hz). IR (KBr, cm<sup>-1</sup>): 3420, 1640, 1293, 1118, 744. HRMS-ESI(*m/z*): [M+Na]<sup>+</sup> calcd. for C<sub>26</sub>H<sub>30</sub>F<sub>3</sub>IN<sub>2</sub>NaO<sub>5</sub>S, 689.0764; found, 689.0756.

### Palladium-catalysed Suzuki coupling

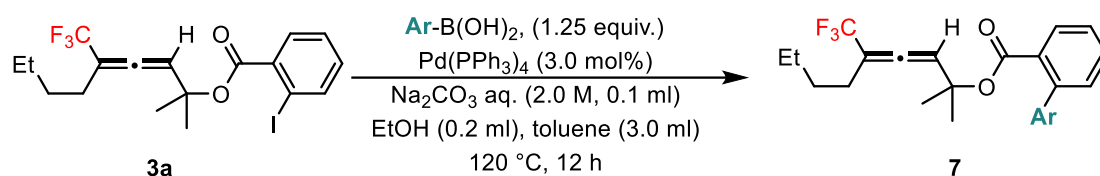

Allenes (0.1 mmol, 1.0 equiv.), Pd(PPh<sub>3</sub>)<sub>4</sub> (4.00 mg, 0.003 mmol, 3 mol%) and arylphenylboric acid (1.25 mmol, 1.25 equiv.), then 2M Na<sub>2</sub>CO<sub>3</sub> (0.1 mL) was added to toluene (1 mL), and stirred at 120 °C for 12 h under nitrogen atmosphere. The reaction was cooled to room temperature and extracted with ethyl acetate and water. The organic phase was dried and dried and purified by column chromatography.

### 2-methyl-5-(trifluoromethyl)nona-3,4-dien-2-yl-4'-bromo-[1,1'-biphenyl]-2-carboxylate (7a)

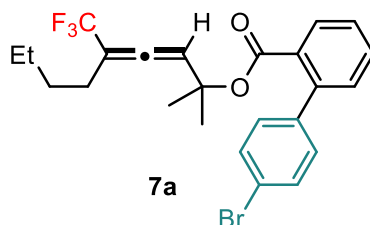

Colourless oil. <sup>1</sup>H NMR (600 MHz, CDCl<sub>3</sub>) δ= 7.82 (dd, *J* = 7.8, 0.9 Hz, 1H), 7.49–7.55 (m, 3H), 7.42 (td, *J* = 7.5, 0.9 Hz, 1H), 7.28–7.31 (m, 1H), 7.18 (d, *J* = 8.4 Hz, 2H), 6.03–6.09 (m, 1H), 2.14 (dd, *J* = 10.5, 4.8 Hz, 2H), 1.42 (dt, *J* = 15.2, 7.5 Hz, 2H), 1.38 (s, 3H), 1.33–1.37 (m, 5H), 0.89 (t, *J* = 7.2 Hz, 3H). <sup>13</sup>C NMR (150 MHz, CDCl<sub>3</sub>) δ= 200.78 (q, *J* = 4.5 Hz), 167.02, 141.14, 140.72, 131.61, 131.21, 131.07, 130.49, 130.22, 130.04, 127.53, 123.59 (q, *J* = 273.8 Hz), 121.27, 104.23, 102.35 (q, *J* = 33.4 Hz), 79.54, 29.38, 26.99, 26.20, 25.99, 22.16, 13.70. <sup>19</sup>F NMR (376 MHz, CDCl<sub>3</sub>) δ= -64.11 (s). IR (KBr, cm<sup>-1</sup>): 3416, 1719, 1289, 1118, 759. HRMS-ESI(*m/z*): [M+Na]<sup>+</sup> calcd. for C<sub>24</sub>H<sub>24</sub>BrF<sub>3</sub>NaO<sub>2</sub>, 503.0804; found, 503.0794.

**2-methyl-5-(trifluoromethyl)nona-3,4-dien-2-yl-3'-hydroxy-[1,1'-biphenyl]-2-carboxylate (7b)**

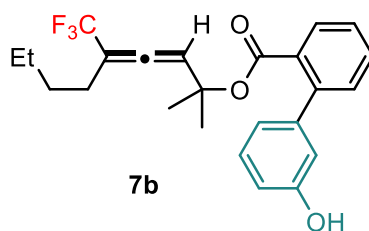

Colourless oil. **<sup>1</sup>H NMR** (600 MHz, CDCl<sub>3</sub>)  $\delta$  = 7.75 (dd,  $J$  = 7.8, 0.9 Hz, 1H), 7.48 (td,  $J$  = 7.5, 1.2 Hz, 1H), 7.39 (td,  $J$  = 7.5, 1.2 Hz, 1H), 7.32 (d,  $J$  = 7.5 Hz, 1H), 7.24 (d,  $J$  = 7.8 Hz, 1H), 6.86 (d,  $J$  = 7.5 Hz, 1H), 6.83 (dd,  $J$  = 7.8, 2.1 Hz, 1H), 6.75–6.78 (m, 1H), 5.97 (dt,  $J$  = 6.4, 3.3 Hz, 1H), 5.41 (brs, 1H), 2.10–2.14 (m, 2H), 1.70 (brs, 1H), 1.38–1.45 (m, 2H), 1.32–1.37 (m, 1H), 1.35 (s, 3H), 1.31 (s, 3H), 0.88 (t,  $J$  = 7.3 Hz, 3H). **<sup>13</sup>C NMR** (150 MHz, CDCl<sub>3</sub>)  $\delta$  = 200.71 (q,  $J$  = 4.2 Hz), 167.90, 155.42, 143.20, 141.75, 132.01, 130.97, 130.33, 129.59, 129.26, 127.27, 123.62 (q,  $J$  = 273.8 Hz), 121.07, 115.67, 114.11, 104.39, 102.29 (q,  $J$  = 33.6 Hz), 79.58, 29.40, 26.91, 26.06, 26.01, 22.15, 13.68. **<sup>19</sup>F NMR** (376 MHz, CDCl<sub>3</sub>)  $\delta$  = -64.12 (d,  $J$  = 3.2 Hz). **IR** (KBr, cm<sup>-1</sup>): 3415, 1695, 1596, 1296, 1119, 759. **HRMS-ESI**( $m/z$ ): [M+Na]<sup>+</sup> calcd. for C<sub>24</sub>H<sub>25</sub>F<sub>3</sub>NaO<sub>3</sub>, 441.1648; found, 441.1649.

**2-methyl-5-(trifluoromethyl)nona-3,4-dien-2-yl 2-(thiophen-3-yl)benzoate (7c)**

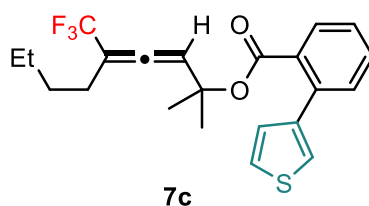

Colourless oil. **<sup>1</sup>H NMR** (400 MHz, CDCl<sub>3</sub>)  $\delta$  = 7.74 (d,  $J$  = 7.5 Hz, 1H), 7.48 (t,  $J$  = 7.5 Hz, 1H), 7.38 (t,  $J$  = 7.5 Hz, 2H), 7.33 (d,  $J$  = 2.5 Hz, 1H), 7.21 (s, 1H), 7.08 (d,  $J$  = 4.8 Hz, 1H), 6.03–6.09 (m, 1H), 2.10–2.17 (m, 2H), 1.39–1.45 (m, 5H), 1.39 (s, 3H), 1.34–1.38 (m, 2H), 0.89 (t,  $J$  = 7.2 Hz, 3H). **<sup>13</sup>C NMR** (100 MHz, CDCl<sub>3</sub>)  $\delta$  = 200.80 (q,  $J$  = 3.3 Hz), 167.59, 141.82, 136.66, 132.24, 130.98, 130.59, 129.59, 128.90, 127.31, 123.65 (q,  $J$  = 272.7 Hz), 124.90, 122.18, 104.39, 102.30 (q,  $J$  = 33.5 Hz), 79.47, 29.44,

27.07, 26.21, 26.03, 22.20, 13.74.  $^{19}\text{F}$  NMR (376 MHz,  $\text{CDCl}_3$ )  $\delta$  = -64.04 (s). IR (KBr,  $\text{cm}^{-1}$ ): 3411, 1619, 1292, 1117, 753. HRMS-ESI( $m/z$ ):  $[\text{M}+\text{Na}]^+$  calcd. for  $\text{C}_{22}\text{H}_{23}\text{F}_3\text{NaO}_2\text{S}$ , 431.1253; found, 431.1263.

### Synthesis of $\text{CF}_3$ -substituted allenol via hydrolysis of compound **3a**

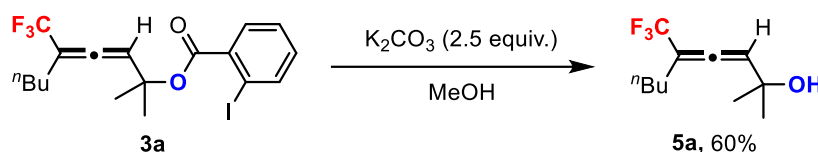

Potassium carbonate (34.6 mg, 0.25 mmol) was added to a solution of **3a** (45.2 mg, 0.1 mmol) in  $\text{CH}_3\text{OH}$  (2 mL). The solution was stirred for about 12 h at 40 °C. After **3a** complete reaction, the reaction was quenched by brine (2 mL), and extracted with EtOAc (5 mL  $\times$  2), the organic solvent was filtrated through a pad of short anhrdrous  $\text{Na}_2\text{SO}_4$  column. Evaporation and flash Silica gel column purification (petroleum: EA = 10:1 as eluent) of the crude product provided **5a** (13.2 mg) in 60% isolated yield.

### 2-methyl-5-(trifluoromethyl)nona-3,4-dien-2-ol (**5a**)

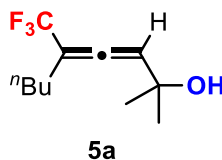

Colourless oil.  $^1\text{H}$  NMR (600 MHz,  $\text{CDCl}_3$ )  $\delta$  = 5.79–5.82 (m, 1H), 2.13–2.18 (m, 2H), 1.84 (s, 1H), 1.44 (dd,  $J$  = 15.2, 7.5 Hz, 2H), 1.38 (s, 6H), 0.92 (t,  $J$  = 7.2 Hz, 3H).  $^{13}\text{C}$  NMR (150 MHz,  $\text{CDCl}_3$ )  $\delta$  = 199.44 (q,  $J$  = 4.2 Hz), 123.69 (q,  $J$  = 271.5 Hz), 108.05, 102.21 (q,  $J$  = 33.6 Hz), 69.97, 29.72, 29.63, 29.31, 25.97, 22.14, 13.71. IR (KBr,  $\text{cm}^{-1}$ ): 3416, 1621, 1118, 617. HRMS-ESI( $m/z$ ):  $[\text{M}+\text{Na}]^+$  calcd. for  $\text{C}_{11}\text{H}_{17}\text{NaO}$ , 245.1124; found, 245.1121.

### 7-(((tert-butyldimethylsilyl)oxy)-2-methyl-5-(trifluoromethyl)hepta-3,4-dien-2-ol (**5p**)

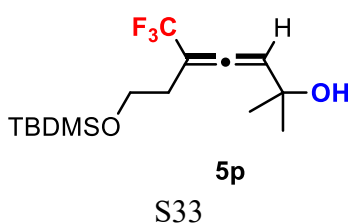

Colourless oil. **<sup>1</sup>H NMR** (400 MHz, CDCl<sub>3</sub>)  $\delta$ = 5.80–5.85 (m, 1H), 3.78 (t,  $J$  = 6.4 Hz, 2H), 2.37 (td,  $J$  = 6.4, 2.8 Hz), 1.38 (s, 6H), 0.90 (s, 9H), 0.08 (s, 6H). **<sup>13</sup>C NMR** (150 MHz, CDCl<sub>3</sub>)  $\delta$ = 199.85 (q,  $J$  = 4.2 Hz), 123.48 (q,  $J$  = 273.0 Hz), 108.43, 98.96 (q,  $J$  = 34.2 Hz), 69.66, 60.77, 30.12, 29.92, 29.54, 18.38, 15.33, -5.22, -5.33. **IR** (KBr, cm<sup>-1</sup>): 3445, 1634, 1117, 690. **HRMS-ESI**( $m/z$ ): [M+Na]<sup>+</sup> calcd. for C<sub>15</sub>H<sub>27</sub>F<sub>3</sub>KO<sub>2</sub>Si, 363.1364; found 363.1388.

**tert-butyl-4-hydroxy-4-(3-(trifluoromethyl)hepta-1,2-dien-1-yl)piperidine-1-carboxylate (5w)**

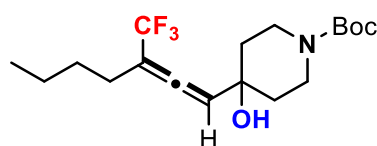

**5w**

Colourless oil. **<sup>1</sup>H NMR** (600 MHz, CDCl<sub>3</sub>)  $\delta$ = 5.75–5.78 (m, 1H), 3.76 (t,  $J$  = 6.4 Hz, 2H), 3.28 (td,  $J$  = 6.4, 2.8 Hz), 2.11–2.22 (m, 2H), 1.64–1.66 (m, 4H), 1.38 (s, 6H), 1.46 (s, 9H), 1.43 (dd,  $J$  = 15.6, 7.8 Hz, 3H), 1.38 (dd,  $J$  = 15.0, 7.2 Hz, 2H), 0.92 (t,  $J$  = 7.2 Hz, 3H). **<sup>13</sup>C NMR** (150 MHz, CDCl<sub>3</sub>)  $\delta$ = 200.03 (q,  $J$  = 3.9 Hz), 154.75, 123.52 (q,  $J$  = 273.6 Hz), 106.84, 103.08 (q,  $J$  = 30.0 Hz), 79.63, 69.28, 37.08, 29.49, 28.41, 25.94, 23.14, 13.73. **IR** (KBr, cm<sup>-1</sup>): 3451, 1638, 689. **HRMS-ESI**( $m/z$ ): [M+Na]<sup>+</sup> calcd. for C<sub>18</sub>H<sub>29</sub>F<sub>3</sub>NO<sub>3</sub>, 364.20941; found 364.20947.

**6-methyl-3-(trifluoromethyl)hepta-3,4-diene-1,6-diol (5s)**

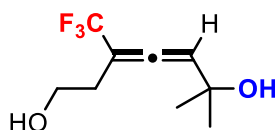

**5s**

Colourless oil. **<sup>1</sup>H NMR** (600 MHz, CDCl<sub>3</sub>)  $\delta$ = 5.81–5.84 (m, 1H), 3.80 (t,  $J$  = 5.4 Hz, 2H), 2.42 (td,  $J$  = 5.4, 2.8 Hz), 1.43 (s, 3H), 1.40 (s, 3H). **<sup>13</sup>C NMR** (150 MHz, CDCl<sub>3</sub>)  $\delta$ = 199.93 (q,  $J$  = 4.2 Hz), 123.43 (q,  $J$  = 273.3 Hz), 108.37, 98.15 (q,  $J$  = 34.2 Hz), 69.99, 59.55, 30.16, 30.13, 29.84. **IR** (KBr, cm<sup>-1</sup>): 3459, 1368, 694. **HRMS-ESI**( $m/z$ ): [M+Na]<sup>+</sup> calcd. for C<sub>9</sub>H<sub>13</sub>F<sub>3</sub>NaO<sub>2</sub>, 233.07599; found 233.07607.

**6-hydroxy-6-methyl-3-(trifluoromethyl)hepta-3,4-dien-1-yl  
methybenzenesulfonate (5t)**

**4-**

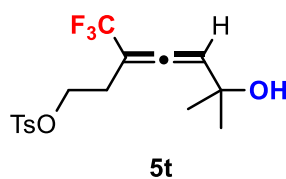

Colourless oil. **<sup>1</sup>H NMR** (600 MHz, CDCl<sub>3</sub>)  $\delta$ = 7.79 (d,  $J$  = 8.4 Hz, 2H), 7.36 (d,  $J$  = 8.1 Hz, 2H), 5.88–5.92 (m, 1H), 4.18 (ddt,  $J$  = 21.9, 10.2, 6.0 Hz, 2H), 2.51–2.56 (m, 2H), 2.46 (s, 3H), 1.40 (s, 6H). **<sup>13</sup>C NMR** (150 MHz, CDCl<sub>3</sub>)  $\delta$ = 200.09 (q,  $J$  = 3.9 Hz), 145.19, 132.63, 129.96, 127.92, 123.12 (q,  $J$  = 273.0 Hz), 109.41, 97.18 (q,  $J$  = 34.5 Hz), 69.76, 66.97, 29.78, 29.17, 26.21, 21.65. **IR** (KBr, cm<sup>-1</sup>): 3458, 2980, 2378, 1647, 661, 558. **HRMS-ESI(m/z)**: [M+Na]<sup>+</sup> calcd. for C<sub>16</sub>H<sub>19</sub>F<sub>3</sub>NaO<sub>4</sub>S, 387.08484; found 387.08442.

**NOESY Experiment:**

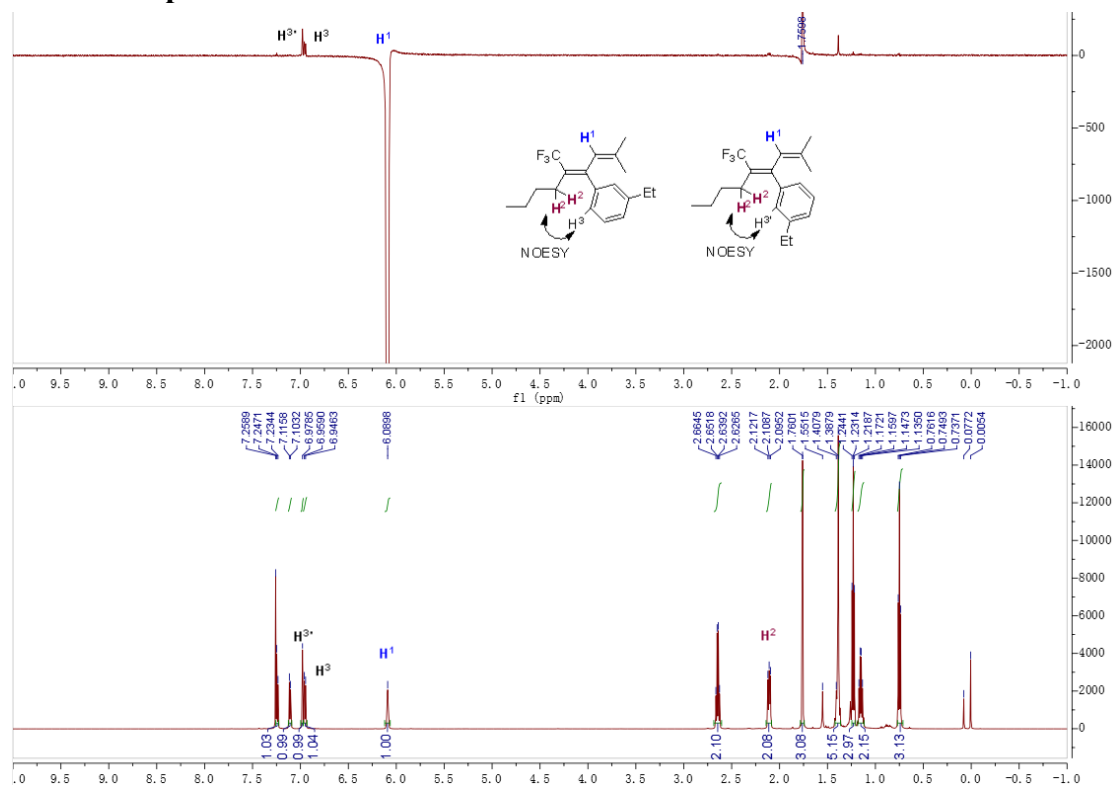

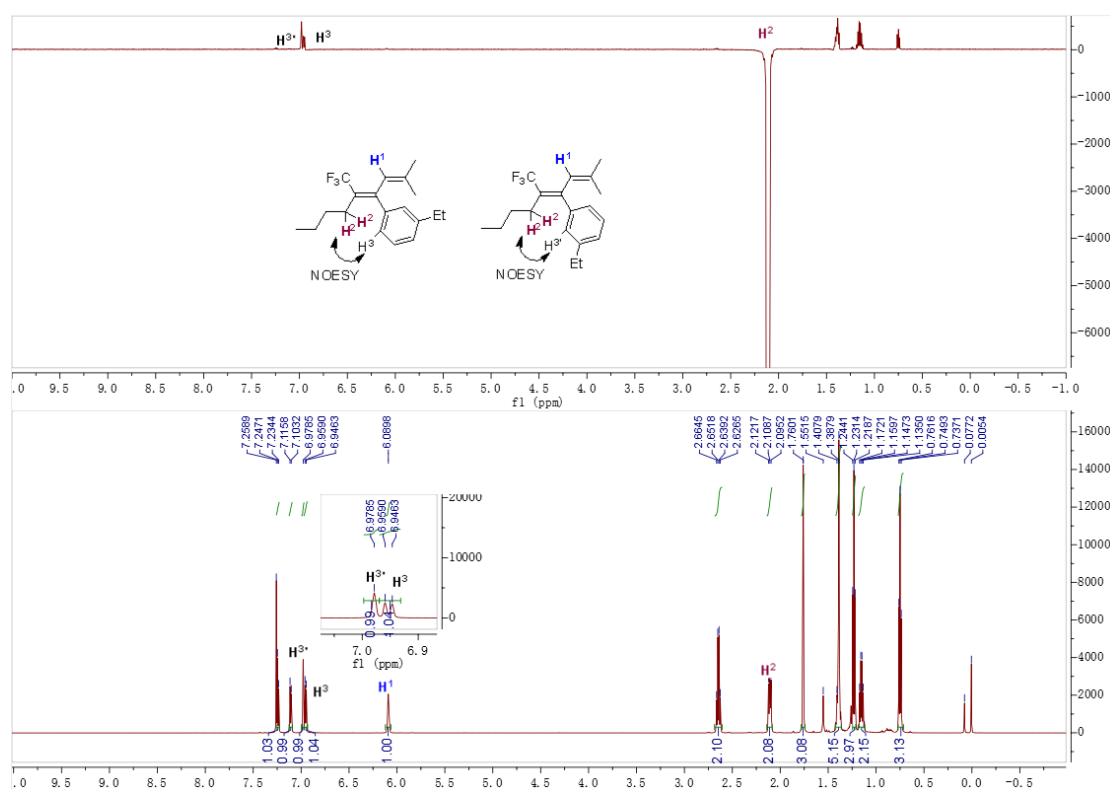

**NOESY Experiments demonstrated E selectivity is the major product**

## Construction of trifluoromethyl substituted 1,3-dienes

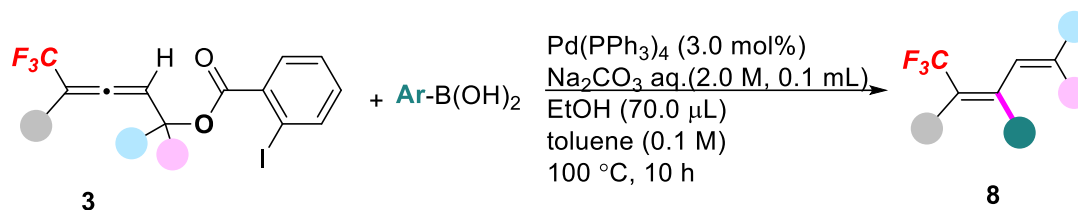

Allenes (0.1 mmol, 1.0 equiv.),  $\text{Pd(PPh}_3)_4$  (4.00 mg, 0.003 mmol, 3.0 mol%) and arylphenylboric acid (0.175 mmol, 1.75 equiv.), then 2 M  $\text{Na}_2\text{CO}_3$  (0.1 mL), EtOH (70.0  $\mu\text{L}$ ) were added to toluene (1.0 mL), and stirred at 100  $^\circ\text{C}$  for 10 h under nitrogen atmosphere. The reaction was cooled to room temperature and extracted with ethyl acetate and water. The organic phase was dried and dried and purified by column chromatography.



**(E)-(2-methyl-5-(trifluoromethyl)nona-2,4-dien-4-yl)benzene (8a)**

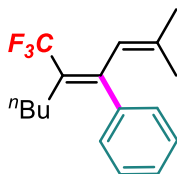

**8a**

**<sup>1</sup>H NMR** (600 MHz, CDCl<sub>3</sub>)  $\delta$  = 7.33 (t,  $J$  = 7.5 Hz, 2H), 7.28 (d,  $J$  = 7.5 Hz, 1H), 7.14 (d,  $J$  = 7.5 Hz, 2H), 6.09 (s, 1H), 2.12 (dd,  $J$  = 0.12, 7.8 Hz, 2H), 1.76 (s, 3H), 1.34–1.41 (m, 2H), 1.38 (s, 3H), 1.14 (dt,  $J$  = 14.5, 7.2 Hz, 2H), 0.74 (t,  $J$  = 7.2 Hz, 3H). **<sup>13</sup>C NMR** (150 MHz, CDCl<sub>3</sub>)  $\delta$  = 144.77 (q,  $J$  = 3.9 Hz), 140.96, 137.33, 128.36, 128.31 (q,  $J$  = 26.1 Hz), 128.19, 127.22, 125.04 (q,  $J$  = 276.6 Hz), 123.47, 31.60, 28.89, 26.50, 22.46, 19.62, 13.58. **<sup>19</sup>F NMR** (376 MHz, CDCl<sub>3</sub>)  $\delta$  = -58.59 (s). **IR** (KBr, cm<sup>-1</sup>): 3416, 1623, 1120, 619. **HRMS-APCI**(m/z): [M+H]<sup>+</sup> calcd. for C<sub>17</sub>H<sub>22</sub>F<sub>3</sub>, 283.1668; found, 283.1674.

**(E)-methyl(2-(2-methyl-5-(trifluoromethyl)nona-2,4-dien-4-yl)phenyl)sulfane (8b)**

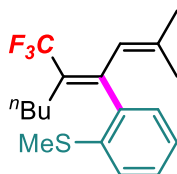

**8b**

Colourless oil. **<sup>1</sup>H NMR** (400 MHz, CDCl<sub>3</sub>)  $\delta$  = 7.29 (td,  $J$  = 7.5, 1.2 Hz, 1H), 7.19 (d,  $J$  = 7.5 Hz, 1H), 7.12 (td,  $J$  = 7.5, 1.2 Hz, 1H), 7.03 (dd,  $J$  = 7.5, 1.2 Hz, 1H), 6.17 (s, 1H), 2.42 (s, 3H), 2.08 (td,  $J$  = 7.5, 1.2 Hz, 1H), 1.83–1.92 (m, 1H), 1.77 (s, 3H), 1.37–1.45 (m, 1H), 1.35 (s, 3H), 1.19–1.29 (m, 1H), 1.11 (ddd,  $J$  = 15.2, 7.5, 3.3 Hz, 2H), 0.70 (t,  $J$  = 7.2 Hz, 3H). **<sup>13</sup>C NMR** (100 MHz, CDCl<sub>3</sub>)  $\delta$  = 142.53 (q,  $J$  = 3.3 Hz), 138.85, 137.88, 136.95, 129.54 (q,  $J$  = 26.4 Hz), 128.81, 127.94, 124.85 (q,  $J$  = 275.1 Hz), 124.83, 124.50, 121.80, 31.01, 29.07, 27.43, 22.49, 19.30, 15.32, 13.55. **<sup>19</sup>F NMR** (376 MHz, CDCl<sub>3</sub>)  $\delta$  = -58.35 (s). **IR** (KBr, cm<sup>-1</sup>): 3418, 1633, 1117, 743. **HRMS-APCI**(m/z): [M+H]<sup>+</sup> calcd. for C<sub>18</sub>H<sub>23</sub>F<sub>3</sub>S, 329.1545; found, 329.1551.

**(E)-1-ethyl-3-(2-methyl-5-(trifluoromethyl)nona-2,4-dien-4-yl)benzene (8c)**

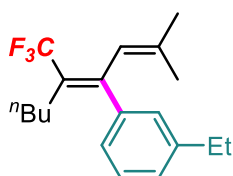

**8c**

**$^1\text{H}$  NMR** (600 MHz,  $\text{CDCl}_3$ )  $\delta$  = 7.24 (d,  $J$  = 7.5 Hz, 1H), 7.10 (d,  $J$  = 7.2 Hz, 1H), 6.97 (s, 1H), 6.95 (d,  $J$  = 7.5 Hz, 1H), 6.08 (s, 1H), 2.64 (q,  $J$  = 7.5 Hz, 2H), 2.10 (dd,  $J$  = 0.3, 7.8 Hz, 2H), 1.75 (s, 3H), 1.34–1.43 (m, 2H), 1.38 (s, 3H), 1.23 (t,  $J$  = 7.5 Hz, 3H), 1.15 (dt,  $J$  = 14.7, 7.5 Hz, 2H), 0.74 (t,  $J$  = 7.5 Hz, 3H).  **$^{13}\text{C}$  NMR** (150 MHz,  $\text{CDCl}_3$ )  $\delta$  = 145.06 (q,  $J$  = 3.9 Hz), 144.19, 140.92, 137.12, 128.14, 128.11 (q,  $J$  = 26.4 Hz), 127.76, 126.75, 125.57, 125.09 (q,  $J$  = 276.6 Hz), 123.47, 31.73, 28.96, 28.83, 26.53, 22.49, 19.60, 15.61, 13.60.  **$^{19}\text{F}$  NMR** (376 MHz,  $\text{CDCl}_3$ )  $\delta$  = -58.65 (s). **IR** (KBr,  $\text{cm}^{-1}$ ): 3420, 2965, 1635, 1329, 1120. **HRMS-APCI**( $m/z$ ):  $[\text{M}+\text{H}]^+$  calcd. for  $\text{C}_{19}\text{H}_{26}\text{F}_3$ , 311.1981; found, 311.1985.

**(E)-1-chloro-4-(2-methyl-5-(trifluoromethyl)nona-2,4-dien-4-yl)benzene (8d)**

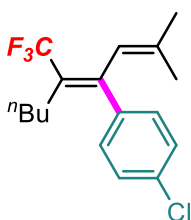

**8d**

Colourless oil.  **$^1\text{H}$  NMR** (600 MHz,  $\text{CDCl}_3$ )  $\delta$  = 7.32 (d,  $J$  = 8.4 Hz, 2H), 7.09 (d,  $J$  = 8.4 Hz, 2H), 6.07 (s, 1H), 2.11 (dd,  $J$  = 0.3, 7.8 Hz, 2H), 1.76 (s, 3H), 1.33–1.41 (m, 2H), 1.37 (s, 3H), 1.16 (td,  $J$  = 15.0, 7.5 Hz, 2H), 0.76 (t,  $J$  = 7.5 Hz, 3H).  **$^{13}\text{C}$  NMR** (150 MHz,  $\text{CDCl}_3$ )  $\delta$  = 143.53 (q,  $J$  = 3.9 Hz), 139.36, 137.93, 133.20, 129.83, 128.91 (q,  $J$  = 26.4 Hz), 128.47, 124.83 (q,  $J$  = 275.1 Hz), 123.15, 31.57, 28.94, 26.47, 22.47, 19.73, 13.61.  **$^{19}\text{F}$  NMR** (376 MHz,  $\text{CDCl}_3$ )  $\delta$  = -58.75 (s). **IR** (KBr,  $\text{cm}^{-1}$ ): 3419, 2963, 1635, 1331, 1121, 741. **HRMS-APCI**( $m/z$ ):  $[\text{M}+\text{H}]^+$  calcd. for  $\text{C}_{17}\text{H}_{21}\text{ClF}_3$ , 317.1278; found, 317.1284.

**(E)-1-bromo-4-(2-methyl-5-(trifluoromethyl)nona-2,4-dien-4-yl)benzene (8e)**

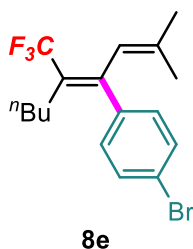

Colourless oil. **<sup>1</sup>H NMR** (600 MHz, CDCl<sub>3</sub>)  $\delta$ = 7.47 (d,  $J$  = 8.4 Hz, 2H), 7.03 (d,  $J$  = 8.4 Hz, 2H), 6.07 (s, 1H), 2.11 (dd,  $J$  = 0.3, 7.8 Hz, 2H), 1.76 (s, 3H), 1.35–1.41 (m, 2H), 1.37 (s, 3H), 1.16 (td,  $J$  = 15.0, 7.5 Hz, 2H), 0.77 (t,  $J$  = 7.5 Hz, 3H). **<sup>13</sup>C NMR** (150 MHz, CDCl<sub>3</sub>)  $\delta$ = 143.54 (q,  $J$  = 4.2 Hz), 139.85, 137.95, 131.43, 130.14, 128.92 (q,  $J$  = 28.5 Hz), 124.81 (q,  $J$  = 275.1 Hz), 123.07, 121.33, 31.57, 28.94, 26.46, 22.47, 19.75, 13.62. **<sup>19</sup>F NMR** (376 MHz, CDCl<sub>3</sub>)  $\delta$ = -58.90 (s). **IR** (KBr, cm<sup>-1</sup>): 3416, 1624, 1399, 1116, 617. **HRMS-APCI**( $m/z$ ): [M+H]<sup>+</sup> calcd. for C<sub>17</sub>H<sub>21</sub>BrF<sub>3</sub>, 361.0773; found, 361.0779.

**(E)-4-(2-methyl-5-(trifluoromethyl)nona-2,4-dien-4-yl)benzaldehyde (8f)**

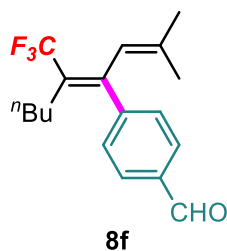

Colourless oil. **<sup>1</sup>H NMR** (600 MHz, CDCl<sub>3</sub>)  $\delta$ = 10.02 (s, 1H), 7.87 (d,  $J$  = 8.1 Hz, 2H), 7.34 (d,  $J$  = 8.1 Hz, 2H), 6.09 (s, 1H), 2.10 (dd,  $J$  = 0.3, 7.8 Hz, 2H), 1.77 (s, 3H), 1.34–1.42 (m, 2H), 1.37 (s, 3H), 1.16 (td,  $J$  = 15.0, 7.5 Hz, 2H), 0.74 (t,  $J$  = 7.5 Hz, 3H). **<sup>13</sup>C NMR** (150 MHz, CDCl<sub>3</sub>)  $\delta$ = 191.68, 147.42, 143.53 (q,  $J$  = 3.9 Hz), 138.48, 135.26, 129.71, 129.49, 129.16, 124.66 (q,  $J$  = 275.1 Hz), 122.65, 31.49, 28.95, 26.45, 22.44, 19.80, 13.55. **<sup>19</sup>F NMR** (376 MHz, CDCl<sub>3</sub>)  $\delta$ = -57.76 (s). **IR** (KBr, cm<sup>-1</sup>): 3416, 1706, 1638, 1119, 613. **HRMS-APCI**( $m/z$ ): [M+H]<sup>+</sup> calcd. for C<sub>18</sub>H<sub>22</sub>F<sub>3</sub>O, 311.1617; found, 311.1622.

**(E)-1-(2-methyl-5-(trifluoromethyl)nona-2,4-dien-4-yl)-4-vinylbenzene (8g)**

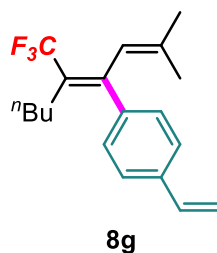

Colourless oil. **<sup>1</sup>H NMR** (600 MHz, CDCl<sub>3</sub>)  $\delta$ = 7.38 (d,  $J$  = 8.1 Hz, 2H), 7.11 (d,  $J$  = 8.1 Hz, 2H), 6.71 (dd,  $J$  = 17.7, 10.8 Hz, 1H), 6.09 (s, 1H), 5.77 (d,  $J$  = 17.1, 1H), 5.27 (d,  $J$  = 11.1 Hz, 1H), 2.14 (dd,  $J$  = 0.3, 7.8 Hz, 2H), 1.76 (s, 3H), 1.35–1.43 (m, 2H), 1.38 (s, 3H), 1.16 (dt,  $J$  = 15.0, 7.5 Hz, 2H), 0.76 (t,  $J$  = 7.5 Hz, 3H). **<sup>13</sup>C NMR** (150 MHz, CDCl<sub>3</sub>)  $\delta$ = 144.42 (q,  $J$  = 3.9 Hz), 140.44, 137.53, 136.50, 136.38, 128.65, 128.37 (q,  $J$  = 26.1 Hz), 126.05, 125.00 (q,  $J$  = 275.1 Hz), 123.36, 114.02, 31.65, 28.96, 26.46, 22.49, 19.71, 13.65. **<sup>19</sup>F NMR** (376 MHz, CDCl<sub>3</sub>)  $\delta$ = -58.57 (s). **IR** (KBr, cm<sup>-1</sup>): 3417, 2963, 1632, 1332, 1121, 910, 742. **HRMS-APCI**(m/z): [M+H]<sup>+</sup> calcd. for C<sub>19</sub>H<sub>24</sub>F<sub>3</sub>, 309.1825; found, 309.1829.

**(E)-9-(2-methyl-5-(trifluoromethyl)nona-2,4-dien-4-yl)phenanthrene (8h)**

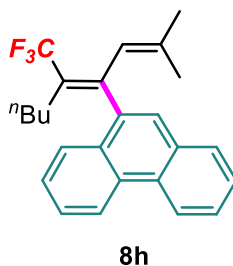

Colourless oil. **<sup>1</sup>H NMR** (400 MHz, CDCl<sub>3</sub>)  $\delta$ = 8.73 (d,  $J$  = 8.4 Hz, 1H), 8.69 (d,  $J$  = 8.1 Hz, 1H), 7.87 (t,  $J$  = 7.5 Hz, 2H), 7.66 (dt,  $J$  = 8.7, 6.3 Hz, 2H), 7.60 (dd,  $J$  = 16.2, 8.1 Hz, 2H), 7.53 (s, 1H), 6.36 (s, 1H), 2.02–2.10 (m, 1H), 1.83–1.86 (m, 1H), 1.74 (s, 3H), 1.29–1.35 (m, 2H), 1.23 (s, 3H), 0.97 (dd,  $J$  = 14.5, 7.2 Hz, 2H), 0.56 (t,  $J$  = 7.2 Hz, 3H). **<sup>13</sup>C NMR** (150 MHz, CDCl<sub>3</sub>)  $\delta$ = 142.85 (q,  $J$  = 3.9 Hz), 138.56, 136.71, 131.40, 130.47, 130.23, 130.09 (q,  $J$  = 25.5 Hz), 129.96, 128.62, 126.88 (q,  $J$  = 276.0 Hz), 126.87, 126.84, 126.76, 126.55, 126.29, 126.13, 122.99, 122.65, 122.58, 31.47, 29.59, 27.68, 22.38, 19.53, 13.48. **<sup>19</sup>F NMR** (376 MHz, CDCl<sub>3</sub>)  $\delta$ = -57.60 (s). **HRMS-**

**ESI(m/z):**  $[M+Na]^+$  calcd. for  $C_{25}H_{25}F_3Na$ , 405.1801; found, 405.1803. **IR** (KBr,  $cm^{-1}$ ):  $\nu = 3417, 1291, 1630, 1450, 1114, 747$ .

**(E)-2-(2-methyl-5-(trifluoromethyl)nona-2,4-dien-4-yl)anthracene (8i)**

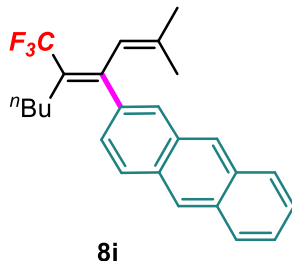

**$^1H$  NMR** (600 MHz,  $CDCl_3$ )  $\delta = 8.39$  (d,  $J = 10.8$  Hz, 2H), 7.97–8.02 (m, 3H), 7.77 (s, 1H), 7.44–7.49 (m, 2H), 7.26 (dd,  $J = 8.7, 1.5$  Hz, 1H), 6.22 (s, 1H), 2.23 (dd,  $J = 0.3, 7.8$  Hz, 2H), 1.79 (s, 3H), 1.45 (td,  $J = 0.3, 7.5$  Hz, 2H), 1.41 (s, 3H), 1.12 (dt,  $J = 15.4, 7.5$  Hz, 2H), 0.70 (t,  $J = 7.5$  Hz, 3H).  **$^{13}C$  NMR** (150 MHz,  $CDCl_3$ )  $\delta = 144.68$  (q,  $J = 4.0$  Hz), 138.00, 137.77, 131.98, 131.92, 131.70, 131.24, 130.64, 128.81 (q,  $J = 27.0$  Hz), 128.17, 128.08, 127.18, 126.93 (q,  $J = 275.1$  Hz), 126.60, 126.40, 125.60, 125.54, 125.33, 123.32, 31.73, 29.08, 26.56, 22.47, 19.81, 13.61.  **$^{19}F$  NMR** (376 MHz,  $CDCl_3$ )  $\delta = -58.57$  (s). **IR** (KBr,  $cm^{-1}$ ):  $\nu = 3417, 1622, 1326, 1112, 740$ . **HRMS-APCI(m/z):**  $[M+H]^+$  calcd. for  $C_{25}H_{26}F_3$ , 383.1981; found, 383.1981.

**(E)-6-(2-methyl-5-(trifluoromethyl)nona-2,4-dien-4-yl)quinolone (8j)**

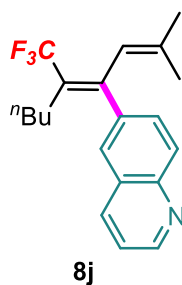

Colourless oil.  **$^1H$  NMR** (600 MHz,  $CDCl_3$ )  $\delta = 8.92$  (dd,  $J = 4.2, 1.5$  Hz, 1H), 8.14 (d,  $J = 8.1$  Hz, 1H), 8.10 (d,  $J = 8.7$  Hz, 1H), 7.61 (d,  $J = 0.9$  Hz, 1H), 7.54 (dd,  $J = 8.7, 1.8$  Hz, 1H), 7.42 (dd,  $J = 8.4, 4.2$  Hz, 1H), 6.18 (s, 1H), 2.17 (dd,  $J = 0.3, 7.8$  Hz, 2H), 1.78 (s, 3H), 1.41 (dd,  $J = 12.9, 2.4$  Hz, 2H), 1.38 (s, 3H), 1.12 (td,  $J = 14.7, 7.5$  Hz, 2H), 0.71 (t,  $J = 7.5$  Hz, 3H).  **$^{13}C$  NMR** (150 MHz,  $CDCl_3$ )  $\delta = 150.62, 147.40, 143.93$

(q,  $J = 3.9$  Hz), 139.24, 138.10, 136.04, 130.40, 129.44, 129.29 (q,  $J = 26.4$  Hz), 127.96, 126.94, 124.87 (q,  $J = 275.1$  Hz), 123.21, 121.47, 31.56, 28.99, 26.44, 22.41, 19.79, 13.55.  **$^{19}\text{F}$  NMR** (376 MHz,  $\text{CDCl}_3$ )  $\delta = -58.72$ . **IR** (KBr,  $\text{cm}^{-1}$ ): 3416, 2962, 1633, 1322, 1117, 839. **HRMS-APCI**( $m/z$ ):  $[\text{M}+\text{H}]^+$  calcd. for  $\text{C}_{20}\text{H}_{23}\text{F}_3\text{N}$ , 334.1777; found, 334.1773.

**(E)-3-(2-methyl-5-(trifluoromethyl)nona-2,4-dien-4-yl)thiophene (8k)**

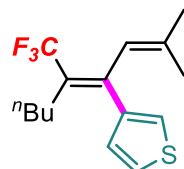

**8k**

Colourless oil.  **$^1\text{H}$  NMR** (600 MHz,  $\text{CDCl}_3$ )  $\delta = 7.29$  (dd,  $J = 4.5, 3.0$  Hz, 1H), 7.08 (d,  $J = 1.8$  Hz, 1H), 6.94 (d,  $J = 4.8$  Hz, 1H), 6.10 (s, 1H), 2.23 (dd,  $J = 0.3, 7.8$  Hz, 2H), 1.77 (s, 3H), 1.41–1.46 (m, 2H), 1.37 (s, 3H), 1.23 (td,  $J = 14.7, 7.5$  Hz, 2H), 0.81 (t,  $J = 7.5$  Hz, 3H).  **$^{13}\text{C}$  NMR** (150 MHz,  $\text{CDCl}_3$ )  $\delta = 140.80, 139.49$  (q,  $J = 3.9$  Hz), 137.58, 128.57 (q,  $J = 26.1$  Hz), 128.37, 125.15, 125.00 (q,  $J = 275.0$  Hz), 123.32, 123.26, 31.86, 29.07, 26.30, 22.53, 19.29, 13.64.  **$^{19}\text{F}$  NMR** (376 MHz,  $\text{CDCl}_3$ )  $\delta = -58.55$  (s). **IR** (KBr,  $\text{cm}^{-1}$ ): 3415, 1622, 1118, 617. **HRMS-APCI**( $m/z$ ):  $[\text{M}+\text{H}]^+$  calcd. for  $\text{C}_{15}\text{H}_{20}\text{F}_3\text{S}$ , 289.1232; found, 289.1221.

**(E)-3-(2-methyl-5-(trifluoromethyl)nona-2,4-dien-4-yl)benzo[b]thiophene (8l)**

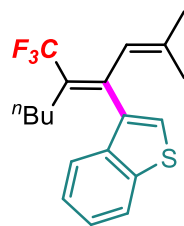

**8l**

Colourless oil.  **$^1\text{H}$  NMR** (600 MHz,  $\text{CDCl}_3$ )  $\delta = 7.81$ –7.91 (m, 1H), 7.56–7.66 (m, 1H), 7.32–7.41 (m, 2H), 7.17 (s, 1H), 6.09 (s, 1H), 2.05 (dd,  $J = 0.3, 7.8$  Hz, 2H), 1.74 (s, 3H), 1.33 (dt,  $J = 15.3, 7.5$  Hz, 2H), 1.25 (s, 3H), 1.07 (td,  $J = 14.7, 7.5$  Hz, 2H), 0.66 (t,  $J = 7.5$  Hz, 3H).  **$^{13}\text{C}$  NMR** (150 MHz,  $\text{CDCl}_3$ )  $\delta = 139.74, 138.88, 138.45$  (q,  $J = 3.9$

Hz), 138.01, 136.03, 130.59 (q,  $J = 26.3$  Hz), 124.52, 124.85 (q,  $J = 275.1$  Hz), 124.37, 123.75, 122.87, 122.71, 122.35, 31.72, 29.43, 27.15, 22.29, 19.16, 13.52.  **$^{19}\text{F}$  NMR** (376 MHz,  $\text{CDCl}_3$ )  $\delta = -58.04$ . **IR** (KBr,  $\text{cm}^{-1}$ ): 3416, 2960, 1636, 1332, 1115, 734. **HRMS-APCI**( $m/z$ ):  $[\text{M}+\text{H}]^+$  calcd. For  $\text{C}_{19}\text{H}_{22}\text{F}_3\text{S}$ , 339.1389; found, 339.1383.

**(E)-3-(1-cyclohexylidene-3-(trifluoromethyl)hept-2-en-2-yl)benzo[b]thiophene (8m)**

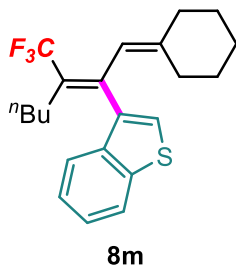

Colourless oil.  **$^1\text{H}$  NMR** (600 MHz,  $\text{CDCl}_3$ )  $\delta = 7.82\text{--}7.88$  (m, 1H), 7.59–7.64 (m, 1H), 7.31–7.39 (m, 2H), 7.18 (s, 1H), 6.17 (s, 1H), 2.10 (dd,  $J = 6.0, 0.06$  Hz, 2H), 2.06 (dd,  $J = 7.8, 0.06$  Hz, 2H), 1.79 (dd,  $J = 6.0, 0.06$  Hz, 2H), 1.50 (dt,  $J = 2.1, 6.0$  Hz, 2H), 1.40 (dt,  $J = 1.2, 6.0$  Hz, 2H), 1.34 (dt,  $J = 0.18, 7.5$  Hz, 2H), 1.13–1.21 (m, 2H), 1.07 (td,  $J = 14.7, 7.5$  Hz, 2H), 0.66 (t,  $J = 7.5$  Hz, 3H).  **$^{13}\text{C}$  NMR** (150 MHz,  $\text{CDCl}_3$ )  $\delta = 145.95, 139.78, 138.26$  (q,  $J = 3.9$  Hz), 137.89, 136.45, 130.75 (q,  $J = 26.1$  Hz), 124.86 (q,  $J = 275.1$  Hz), 124.50, 124.26, 123.53, 123.05, 122.69, 119.35, 37.86, 31.66, 30.12, 29.45, 28.36, 26.96, 26.30, 22.30, 13.51.  **$^{19}\text{F}$  NMR** (376 MHz,  $\text{CDCl}_3$ )  $\delta = -57.92$  (s). **IR** (KBr,  $\text{cm}^{-1}$ ): 3458, 2931, 1632, 1112, 742. **HRMS-APCI**( $m/z$ ):  $[\text{M}+\text{H}]^+$  calcd. for  $\text{C}_{22}\text{H}_{26}\text{F}_3\text{S}$ , 379.1702; found, 379.1697.

**tert-butyl (E)-4-(2-(benzo[b]thiophen-3-yl)-3-(trifluoromethyl)hept-2-en-1-ylidene)piperidine-1-carboxylate (8n)**

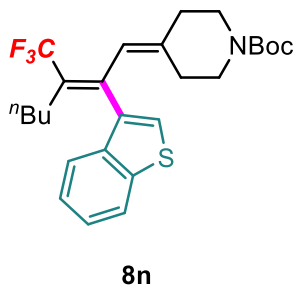

Colourless oil. **<sup>1</sup>H NMR** (600 MHz, CDCl<sub>3</sub>) δ= 7.79 – 7.89 (m, 1H), 7.57–7.62 (m, 1H), 7.37 (dd, *J* = 6.0, 3.1 Hz, 2H), 7.19 (s, 1H), 6.33 (s, 1H), 3.36 (s, 2H), 3.08 – 2.99 (m, 2H), 2.17 (s, 3H), 2.03–2.12 (m, 2H), 1.81 (s, 2H), 1.40 (s, 9H), 1.34 (dt, *J* = 15.3, 7.6 Hz, 2H), 1.09 (dt, *J* = 14.8, 7.5 Hz, 2H), 0.67 (t, *J* = 7.5 Hz, 3H). **<sup>13</sup>C NMR** (150 MHz, CDCl<sub>3</sub>) δ= 154.56, 141.26 (q, *J* = 1.5 Hz), 139.82, 137.66, 137.30, 135.88, 131.83 (q, *J* = 26.4 Hz), 124.72, 124.69 (q, *J* = 276.0 Hz), 124.44, 123.81, 122.84 (C×2), 121.62, 79.48, 36.61, 31.62, 29.45, 29.44, 28.38, 22.28, 13.48. **IR** (KBr, cm<sup>-1</sup>): 3415, 1695, 1638, 1423, 1111, 613. **HRMS-APCI**(*m/z*): [*M*+*H*]<sup>+</sup> calcd. for C<sub>26</sub>H<sub>33</sub>F<sub>3</sub>NO<sub>2</sub>S, 480.2179; found, 480.2188.

**(3R,5R,8R,9S,10S,13R,14S,17R)-10,13-dimethyl-17-((R)-5-oxo-5-(((Z)-1,1,1-trifluoro-5-methyl-3-(thianthren-1-yl)hexa-2,4-dien-2-yl)amino)pentan-2-yl)hexadecahydro-1H-cyclopenta[a]phenanthren-3-yl benzoate (8o)**

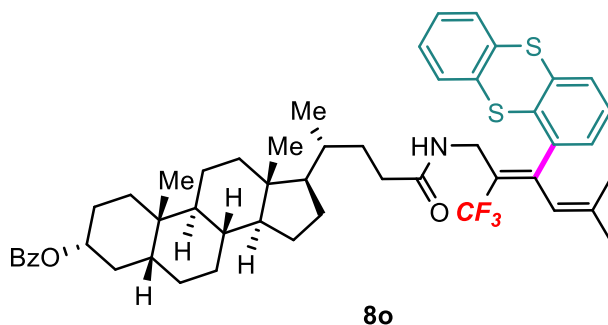

**<sup>1</sup>H NMR** (600 MHz, CDCl<sub>3</sub>) δ= 8.05 (d, *J* = 7.5 Hz, 2H), 7.54 (t, *J* = 7.5 Hz, 1H), 7.48 (t, *J* = 7.9 Hz, 3H), 7.43 (t, *J* = 7.7 Hz, 2H), 7.22–7.28 (m, 3H), 7.12 (d, *J* = 7.5 Hz, 1H), 6.23 (s, 1H), 5.32 (brs, 1H), 4.97 (septet, *J* = 5.1 Hz, 1H), 3.96 (quintet, *J* = 7.2 Hz, 1H), 3.68 (dt, *J* = 15.9, 4.2 Hz, 1H), 2.04–2.08 (m, 1H), 1.93–1.99 (m, 2H), 1.84–1.91 (m, 3H), 1.77–1.83 (m, 2H), 1.80 (s, 3H), 1.66–1.70 (m, 3H), 1.49–1.55 (m, 2H), 1.36–1.47 (m, 4H), 1.30 (s, 3H), 1.15–1.24 (m, 4H), 1.10–1.12 (m, 5H), 0.96 (s, 3H), 0.80–0.88 (m, 5H), 0.63 (d, *J* = 1.9 Hz, 3H). **<sup>13</sup>C NMR** (150 MHz, CDCl<sub>3</sub>) δ= 172.63, 166.10, 146.60 (q, *J* = 3.6 Hz), 141.40, 139.18, 136.19 (q, *J* = 2.4 Hz), 135.98, 134.63, 134.15 (q, *J* = 4.5 Hz), 132.63, 130.92, 129.49, 128.71, 128.62, 128.56, 128.21, 128.04, 127.88, 127.79, 127.61, 124.58 (q, *J* = 27.4 Hz), 124.20 (q, *J* = 275.0 Hz), 121.24, 74.98, 56.45, 56.06, 42.71, 41.95, 40.46, 40.13, 37.89, 35.79, 35.37, 35.34, 35.07, 34.63, 33.40,



32.35, 31.54, 31.52, 28.16, 27.65, 27.04, 26.75, 26.32, 24.14, 23.34, 20.85, 19.59, 18.28, 12.01. **<sup>19</sup>F NMR** (376 MHz, CDCl<sub>3</sub>)  $\delta$ = -58.24 (s). **IR** (KBr, cm<sup>-1</sup>): 3416, 1640, 1273, 1116, 749. **FT-ICR-MS-MALDI**(m/z): [M]<sup>+</sup> calcd. for C<sub>51</sub>H<sub>60</sub>F<sub>3</sub>NO<sub>3</sub>S<sub>2</sub>, 855.39612; found, 855.39594.

**(E)-6-methyl-4-(thianthren-1-yl)-3-(trifluoromethyl)hepta-3,5-dien-1-yl-5-((3a*S*,4*S*,6a*R*)-2-oxohexahydro-1*H*-thieno[3,4-*d*]imidazol-4-yl) pentanoate (8p)**

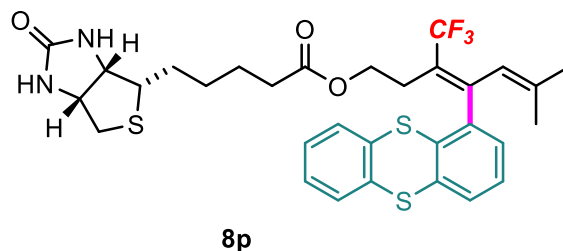

**<sup>1</sup>H NMR** (600 MHz, Acetone)  $\delta$ = 7.56–7.60 (m, 3H), 7.43 (t, *J* = 7.8 Hz, 1H), 7.33–7.38 (m, 2H), 7.29 (dd, *J* = 7.5, 0.9 Hz, 1H), 6.26 (brs, 1H), 6.02 (brs, 1H), 5.85 (brs, 1H), 4.48 (dd, *J* = 2.1, 5.1 Hz, 1H), 4.26–4.33 (m, 1H), 3.98 (t, *J* = 6.8 Hz, 2H), 3.14–3.20 (m, 1H), 2.90–2.93 (m, 1H), 2.69 (d, *J* = 12.5 Hz, 1H), 2.53 (quint, *J* = 6.9 Hz, 1H), 2.34 (quint, *J* = 6.9 Hz, 1H), 2.21 (t, *J* = 7.5 Hz, 2H), 1.78 (s, 3H), 1.69–1.75 (m, 1H), 1.52–1.60 (m, 3H), 1.36–1.40 (m, 2H), 1.35 (s, 3H). **<sup>13</sup>C NMR** (150 MHz, Acetone)  $\delta$ = 172.37, 162.93, 145.78 (q, *J* = 3.9 Hz), 139.83, 139.49, 136.38, 135.84, 134.66, 133.98, 128.98, 128.59, 128.42, 128.35, 128.33, 138.23, 127.97, 125.04 (q, *J* = 27.3 Hz), 124.65 (q, *J* = 274.2 Hz), 121.58, 61.65, 61.58, 61.57, 59.92, 55.53, 40.15, 33.33, 28.27, 28.25, 26.46, 24.62, 18.88. **IR** (KBr, cm<sup>-1</sup>): 3416, 2934, 1712, 1641, 1273, 1115, 749. **FT-ICR-MS-MALDI**(m/z): [M]<sup>+</sup> calcd. for C<sub>31</sub>H<sub>33</sub>F<sub>3</sub>N<sub>2</sub>O<sub>3</sub>S<sub>3</sub>, 634.15999; found, 634.15976.

## Mechanism Study

## Radical trapped experiments

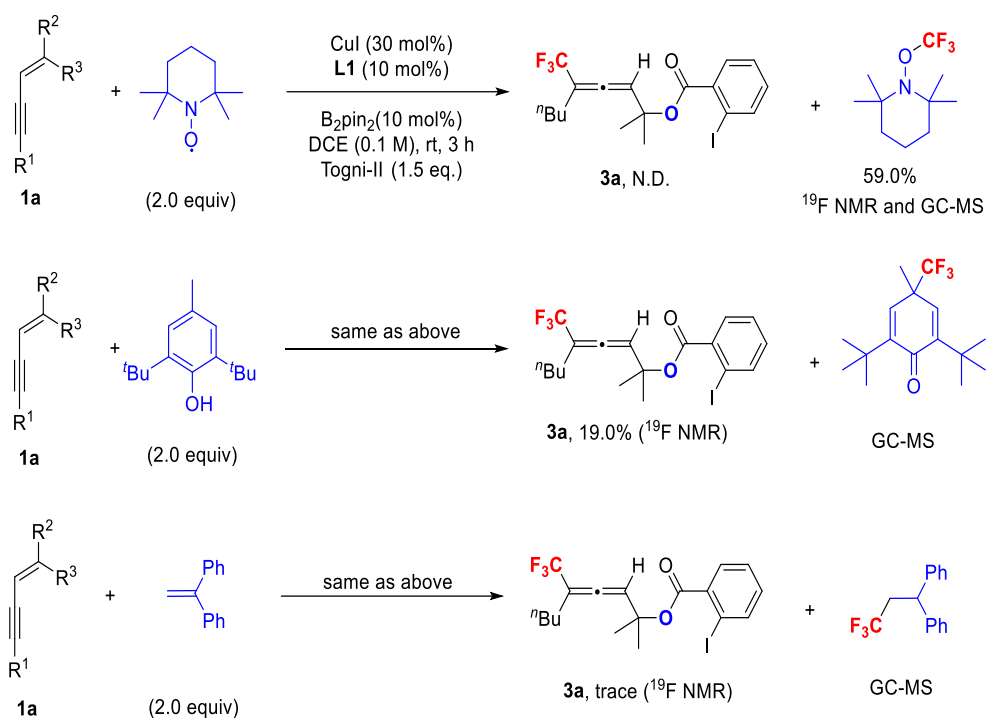

In an oven-dried 8 mL screwed-capped vial B<sub>2</sub>Pin<sub>2</sub> (2.5 mg, 0.01 mmol, 10 mol%), 6,6'-dibromo-2,2'-bipyridine (1.8 mg, 0.01 mmol, 10 mol%), **2** (47.4 mg, 0.15 mmol, 1.5 equiv.), radical scavenger (2.0 equiv) were weighted. Then the vial was transferred into the glove-box, CuI (5.7 mg, 0.01 mmol, 30 mol%), **1a** (13.6 mg, 0.1 mmol, 1.0 equiv.) and anhydrous DCE (1.0 mL) were added to the vial. The vial was sealed and moved outside of the glove-box. The vial was kept at 25 °C about 3 hours. After the reaction completion monitored by <sup>19</sup>F NMR and GC-MS.

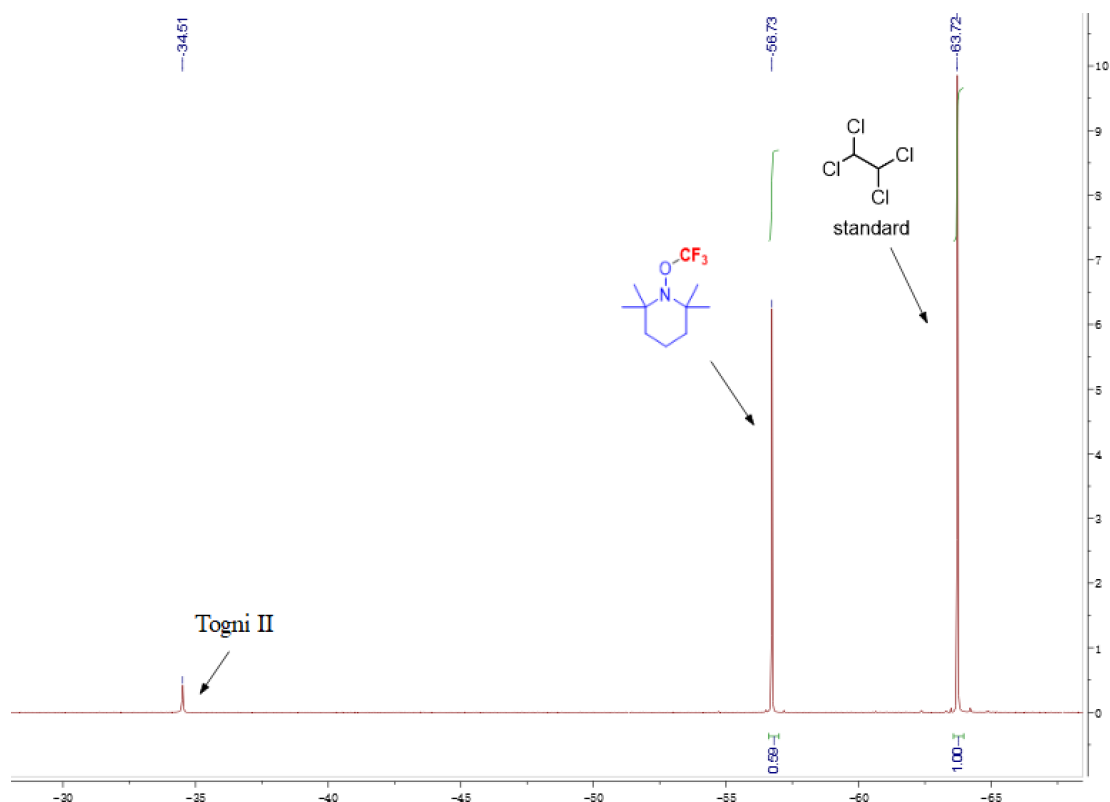

## Control experiments for mechanistic studies

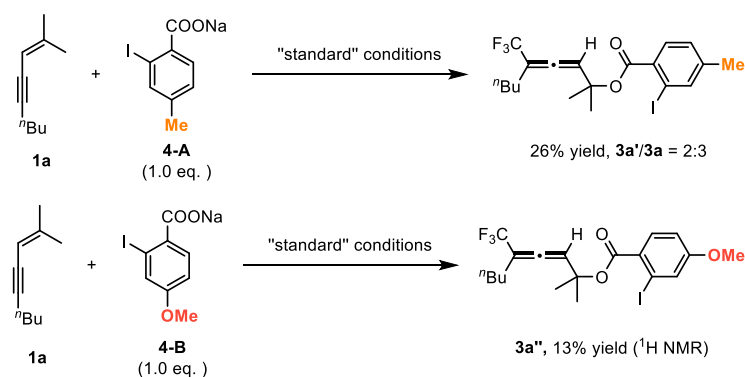

In an oven-dried 8 mL screwed-capped vial  $\text{B}_2\text{Pin}_2$  (1.8 mg, 0.005 mmol, 10 mol%), 6,6'-dibromo-2,2'-bipyridine (1.5 mg, 0.005 mmol, 10 mol%), **2** (23.7 mg, 0.075 mmol, 1.5 equiv.), **4-A** (1.0 equiv, 14.0mg) or **4-B** (1.0 equiv, 15.0 mg) were weighted. Then the vial was transferred into the glove-box,  $\text{CuI}$  (3.0 mg, 0.015 mmol, 30 mol%), **1a** (6.8 mg, 0.05 mmol, 1.0 equiv.) and anhydrous DCE (0.6 mL) were added to the vial. The vial was sealed and moved outside of the glove-box. The vial was kept at 25 °C about 8 hours. After the reaction completion monitored by TLC ( $R_f$  = 0.3, PE), the

reaction was quenched by brine (2 mL), and extracted with EtOAc (5 mL  $\times$  2), the organic solvent was filtrated through a pad of short anhrdrous Na<sub>2</sub>SO<sub>4</sub> column. Evaporation and flash Silica gel column purification (petroleum as eluent) of the crude product provided **3a** and **3a'** or **3a''**.

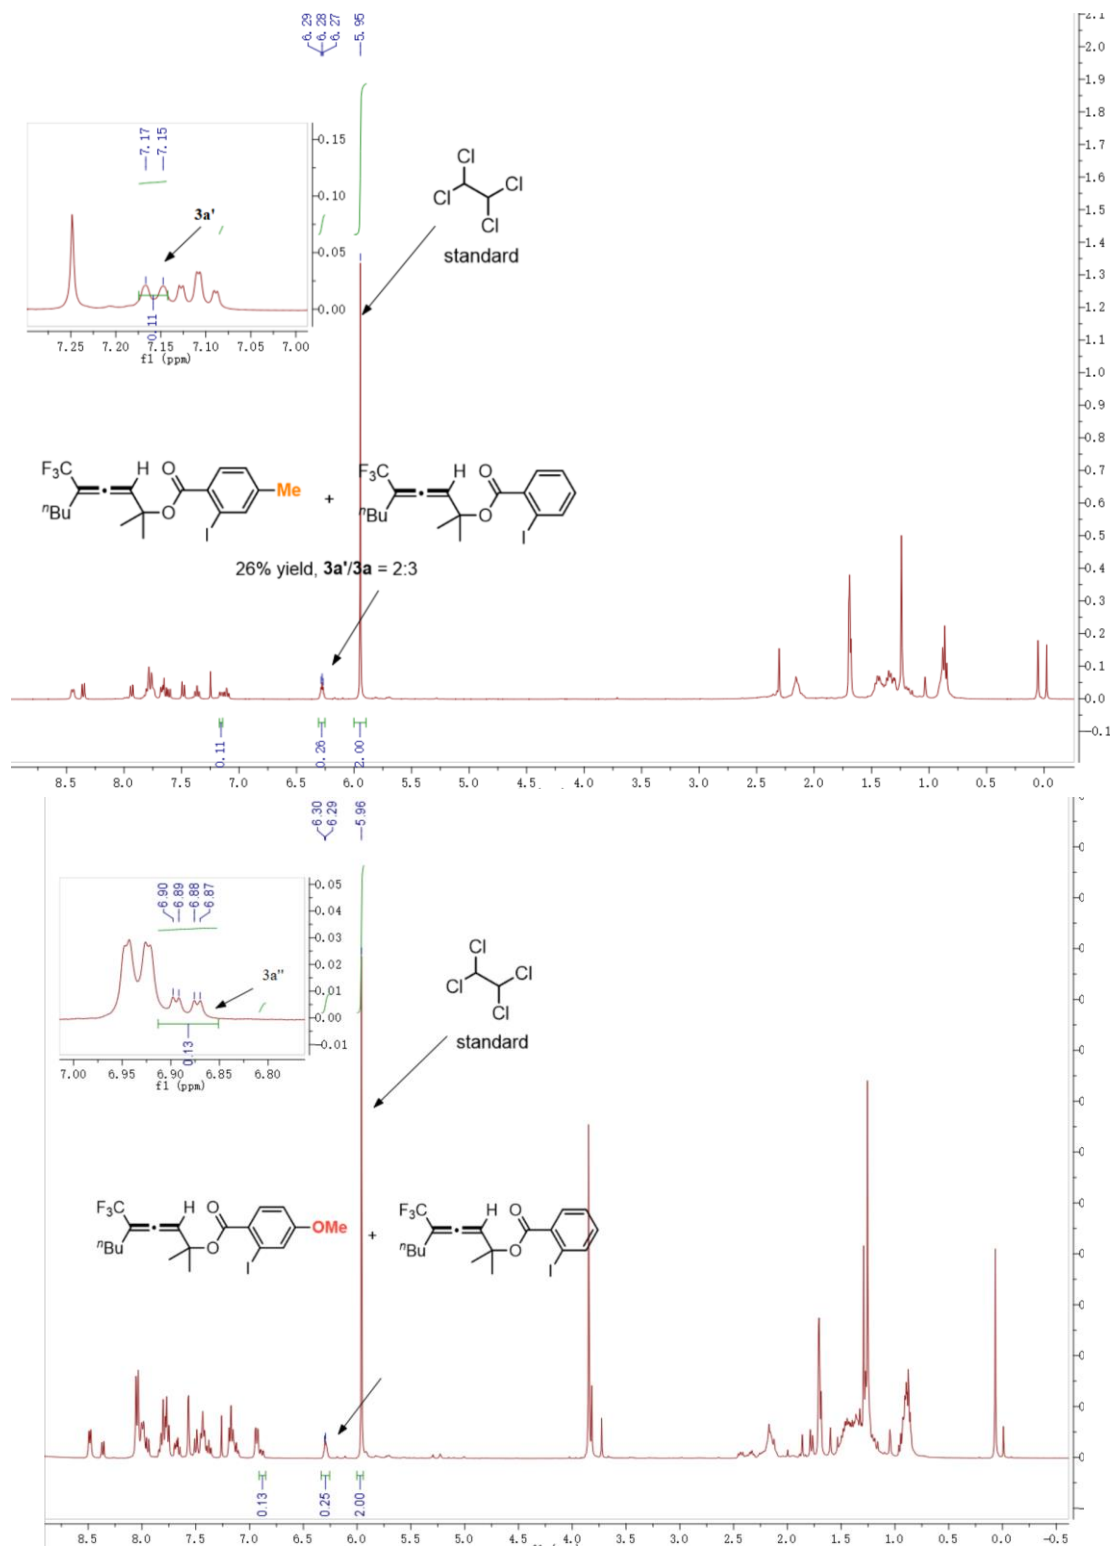

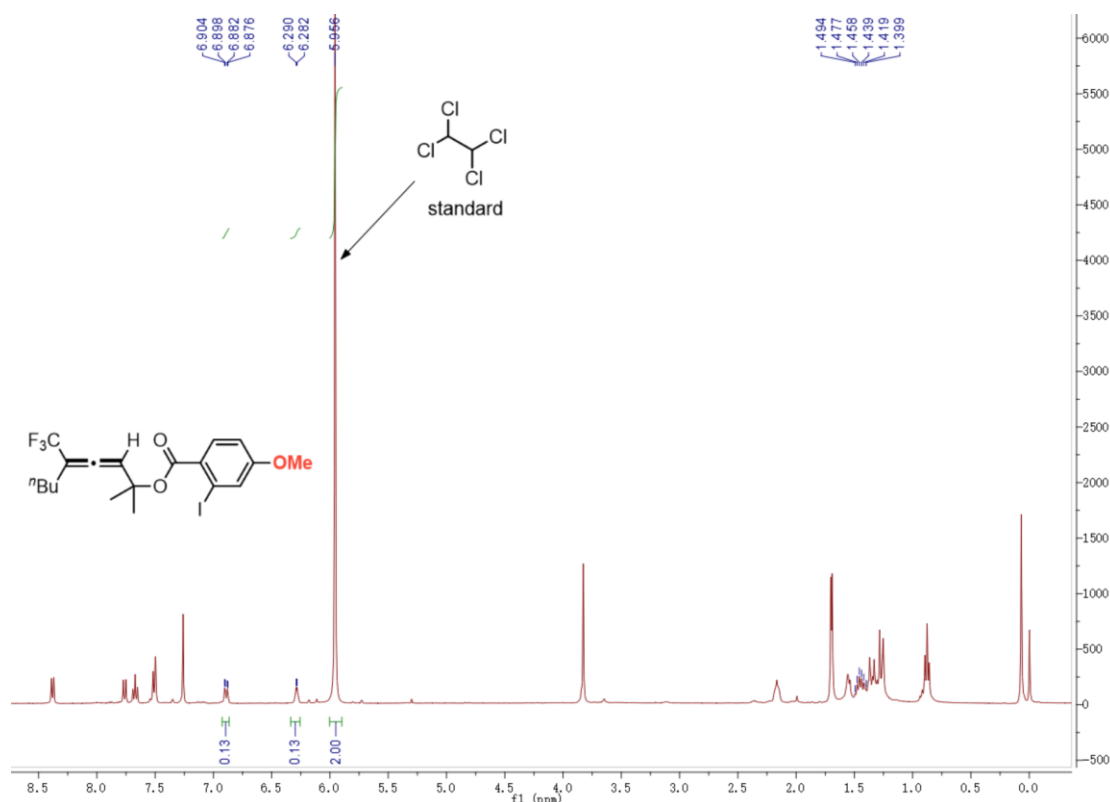

### The role of B<sub>2</sub>pin<sub>2</sub> in the catalytic protocol

In an oven-dried 8 mL screwed-capped vial "B source" (0.01 mmol, 10 mol%), 6,6'-dibromo-2,2'-bipyridine (1.8 mg, 0.01 mmol, 10 mol%), **2** (47.4 mg, 0.15 mmol, 1.5 equiv.), were weighted. Then the vial was transferred into the glove-box, CuI (5.7 mg, 0.03 mmol, 30 mol%), **1a** (13.6 mg, 0.1 mmol, 1.0 equiv.) and anhydrous DCE (0.1 mL) were added to the vial. The vial was sealed and moved outside of the glove-box. The vial was kept at 25 °C about 8 hours. After the reaction completion monitored by TLC ( $R_f$  = 0.3, PE), the reaction was quenched by brine (2 mL), and extracted with EtOAc (5 mL  $\times$  2), the organic solvent was filtrated through a pad of short anhrdrous Na<sub>2</sub>SO<sub>4</sub> column. Evaporation and flash Silica gel column purification (petroleum as eluent) of the crude product provided **3a**. Entries 1-4 was followed the same procedure as above. Entries 5,6 was using Zn or Mg (1.0 equiv) instead of B source.

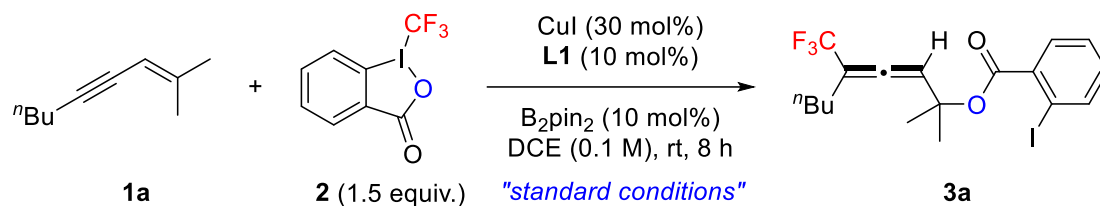

| entry | "B source"                                     | yield (%) |
|-------|------------------------------------------------|-----------|
| 1     | B <sub>2</sub> pin <sub>2</sub>                | 73%       |
| 2     | B(OMe) <sub>3</sub>                            | 71%       |
| 3     | B(OPh) <sub>3</sub>                            | 73%       |
| 4     | B(C <sub>6</sub> F <sub>5</sub> ) <sub>3</sub> | 67%       |
| 5     | Zn (1.0 equiv.)                                | 28%       |
| 6     | Mg (1.0 equiv)                                 | 46%       |

A solution of B<sub>2</sub>Pin<sub>2</sub> (6.3 mg,, 50 mol%) in 0.1 mL CDCl<sub>3</sub> was added into a solution of **2** (23.7 mg,, 1.5 equiv.) in 0.4 mL CDCl<sub>3</sub>. The vial was kept at 25 °C about 0.5 hours. After the reaction completion monitored by <sup>19</sup>F NMR .

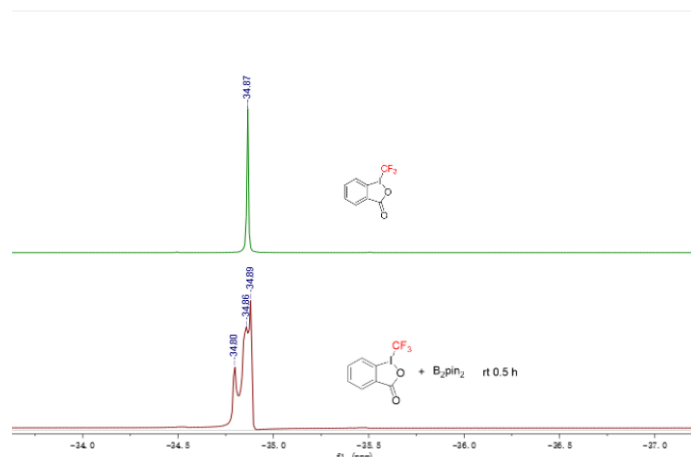

## Possible mechanism

Based on the known literature<sup>5,6</sup>, the reaction mechanism was speculated as shown in the following figure.

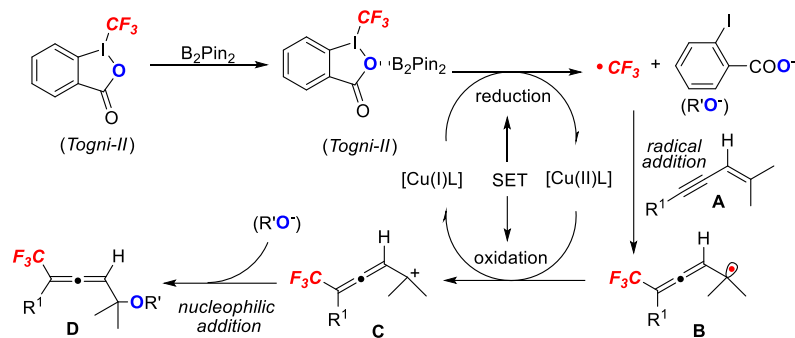

## References

- (1) Stanek, K.; Koller, R.; Togni, A. Reactivity of a 10-I-3 Hypervalent Iodine Trifluoromethylation Reagent With Phenols. *J. Org. Chem.* **2008**, *73*, 7678.
- (2) Qin, Q.; Luo, X.; Wei, J.; Zhu, Y.; Wen, X.; Song, S.; Jiao, N. Acetonitrile Activation: An Effective Two-Carbon Unit for Cyclization. *Angew. Chem. Int. Ed.* **2019**, *58*, 4376.
- (3) Sun, J.; Yuan, W.; Tian, R.; Wang, P.; Zhang, X.-P.; Li, X. Rhodium(III)-Catalyzed Asymmetric [4+1] and [5+1] Annulation of Arenes and 1,3-Enynes: A Distinct Mechanism of Allyl Formation and Allyl Functionalization. *Angew. Chem. Int. Ed.* **2020**, *59*, 22706.
- (4) Sasaki, Y.; Horita, Y.; Zhong, C.; Sawamura, M.; Ito, H. Copper(I)-Catalyzed Regioselective Monoborylation of 1,3-Enynes with an Internal Triple Bond: Selective Synthesis of 1,3-Dienylboronates and 3-Alkynylboronates. *Angew. Chem. Int. Ed.* **2011**, *50*, 2778.
- (5) Fu, L.; Grebies, S.; Chen, P.; Liu, G. Recent Advances and Perspectives in Transition Metal-Catalyzed 1,4-Functionalizations of Unactivated 1,3-Enynes for the Synthesis of Allenes. *Chin. J. Chem.* **2020**, *38*, 91.
- (6) Gao, P.; Song, X.-R.; Liu, X.-Y.; Liang, Y.-M. Recent Developments in the Trifluoromethylation of Alkynes *Chem. Eur. J.* **2015**, *21*, 7648.

- (7) Amedeo, L.; Gianni, M.; Carlo, R.; Elena, P.; Davide, G.; Marco, L.-M. World Intellectual Property Organization, WO2009015897 A1[P], **2009**.
- (8) Gogoi, P., Sigüeiro, R., Eduardo, S. and Mouriño, A. (2010), An Expeditious Route to 1 $\alpha$ ,25-Dihydroxyvitamin D3 and Its Analogues by an Aqueous Tandem Palladium-Catalyzed A-Ring Closure and Suzuki Coupling to the C/D Unit. *Chem. Eur. J.*, **2010**, *16*: 1432.
- (9) P. Eisenberger, S. Gischig, and A. Togni, Novel 10-I-3 Hypervalent Iodine-Based Compounds for Electrophilic Trifluoromethylation. *Chem. Eur. J.*, **2006**, *12*: 2579.



# NMR Spectra

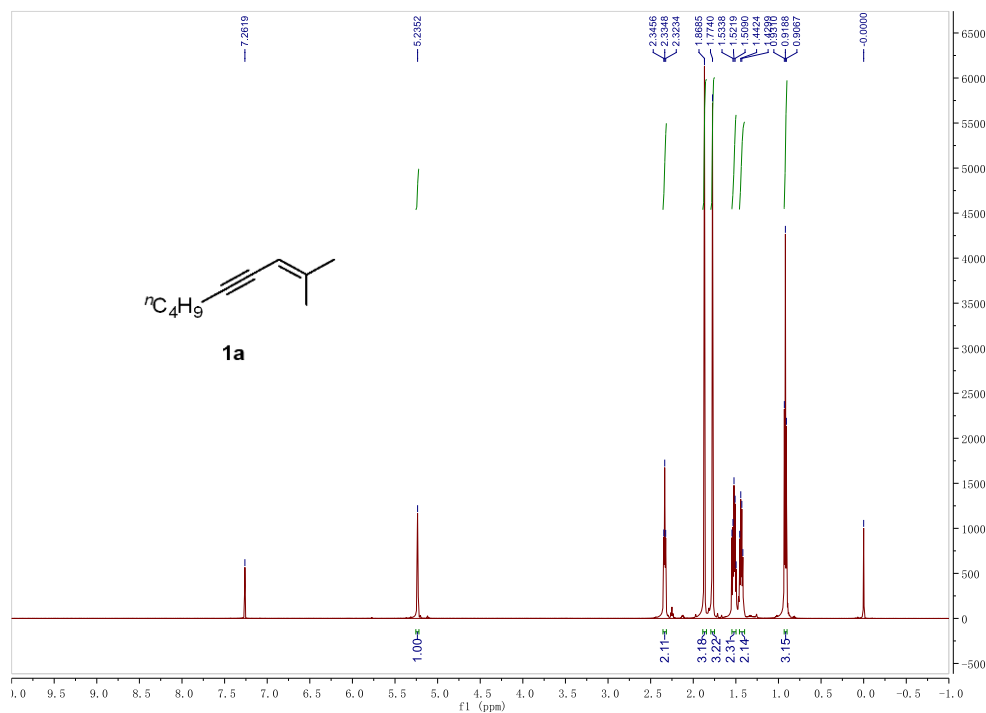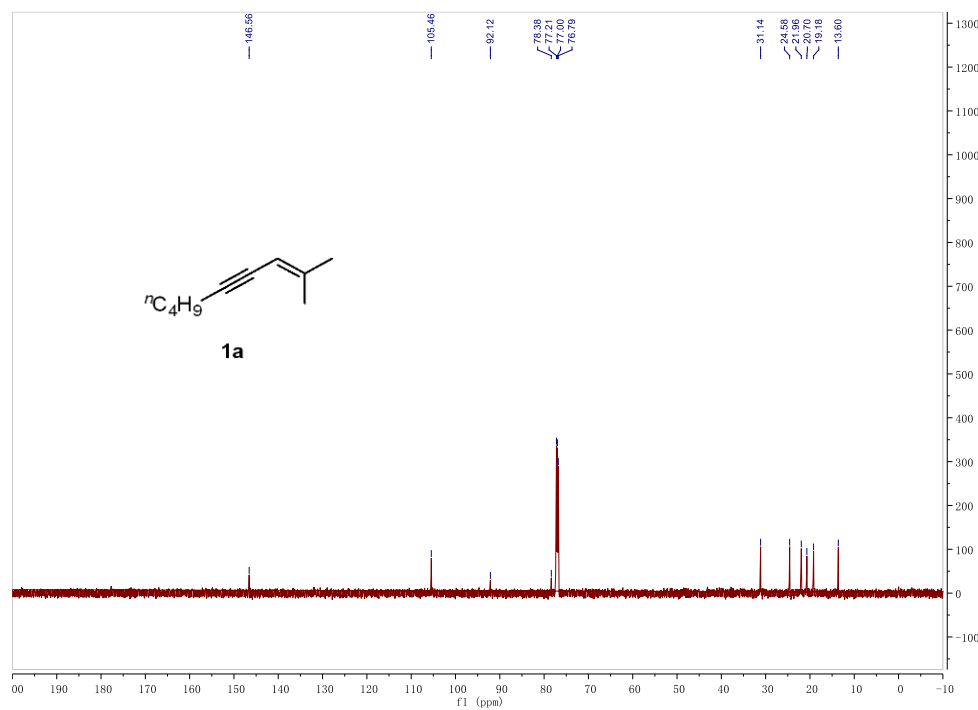

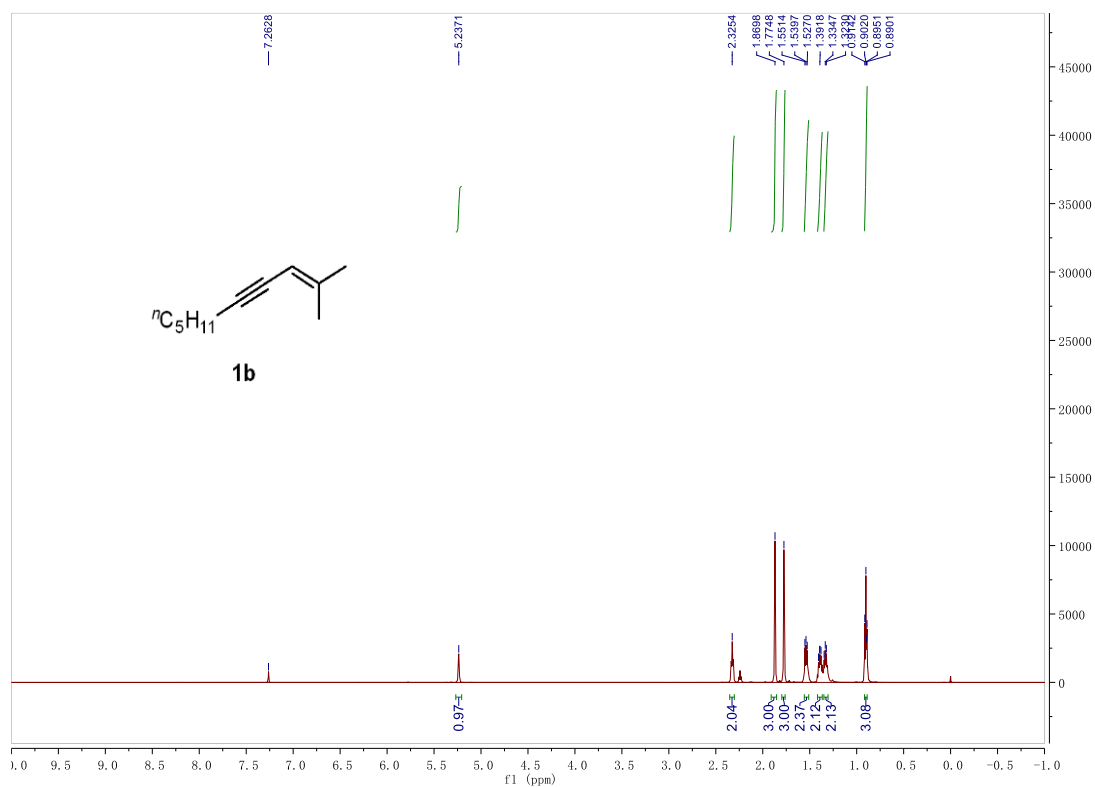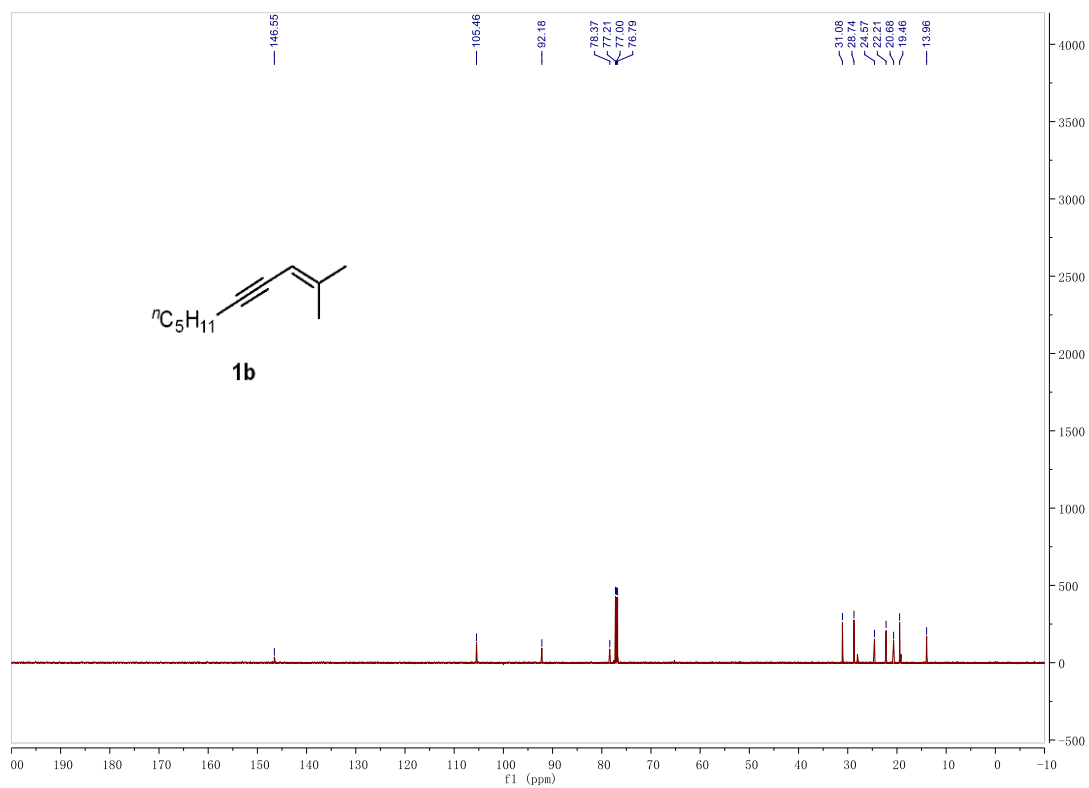

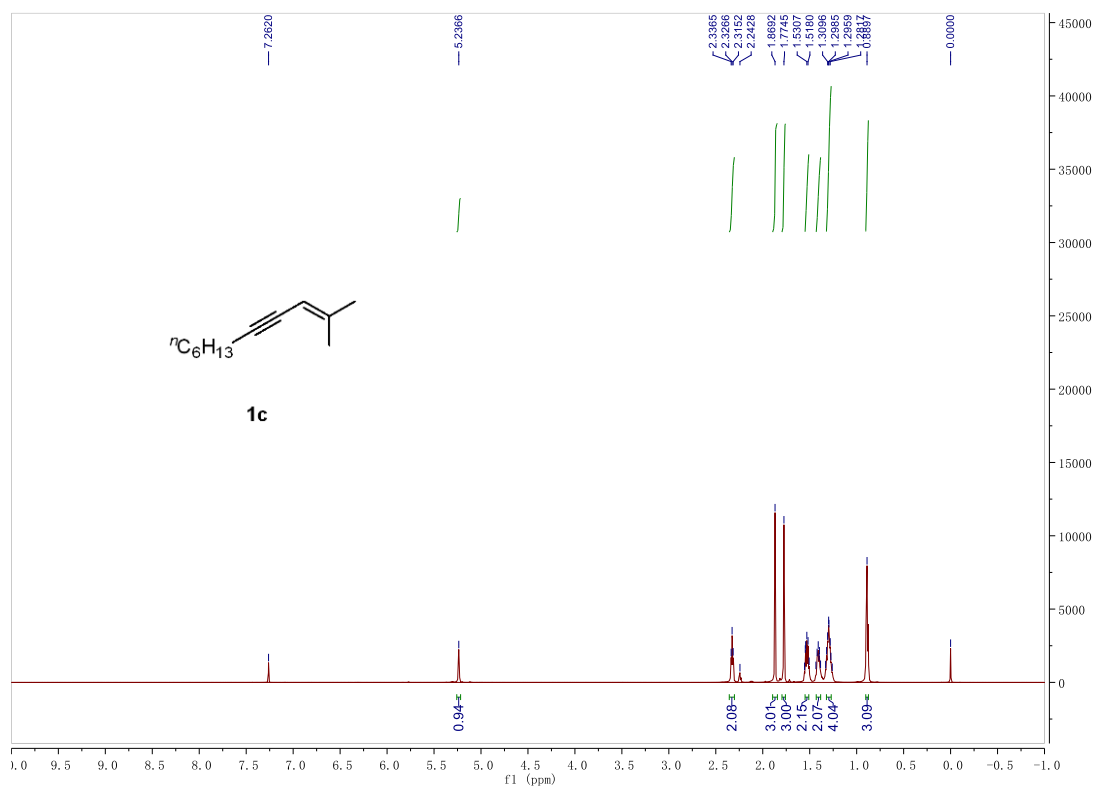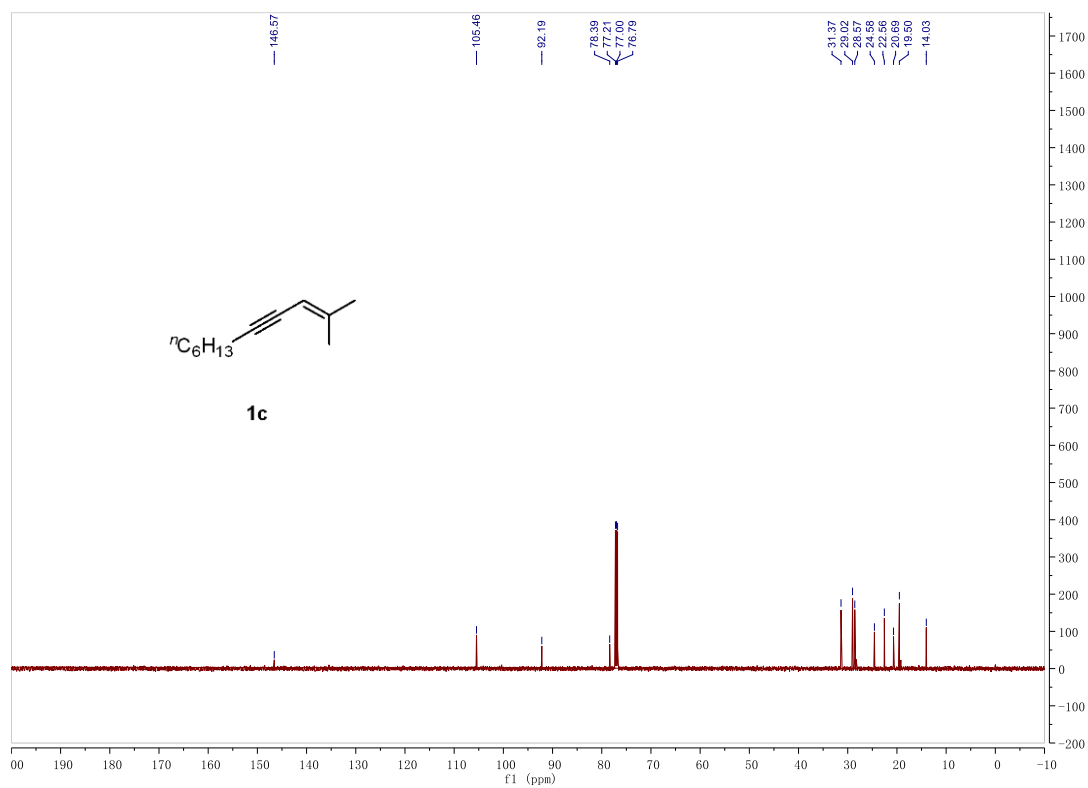

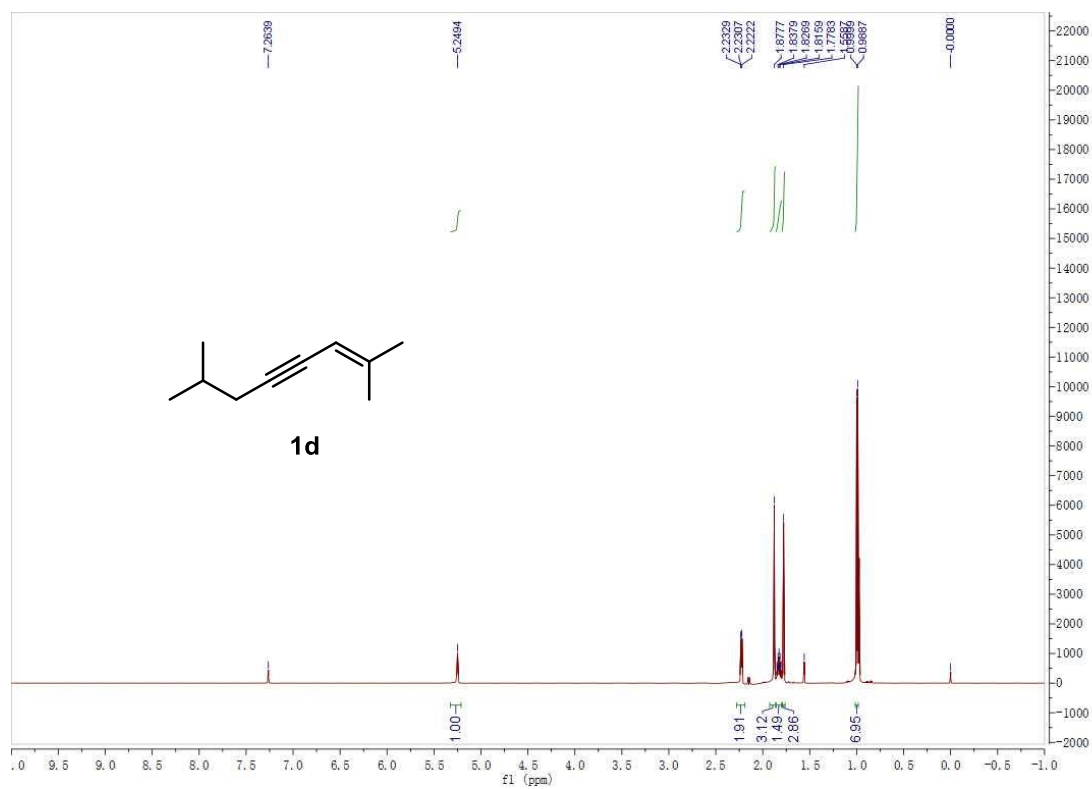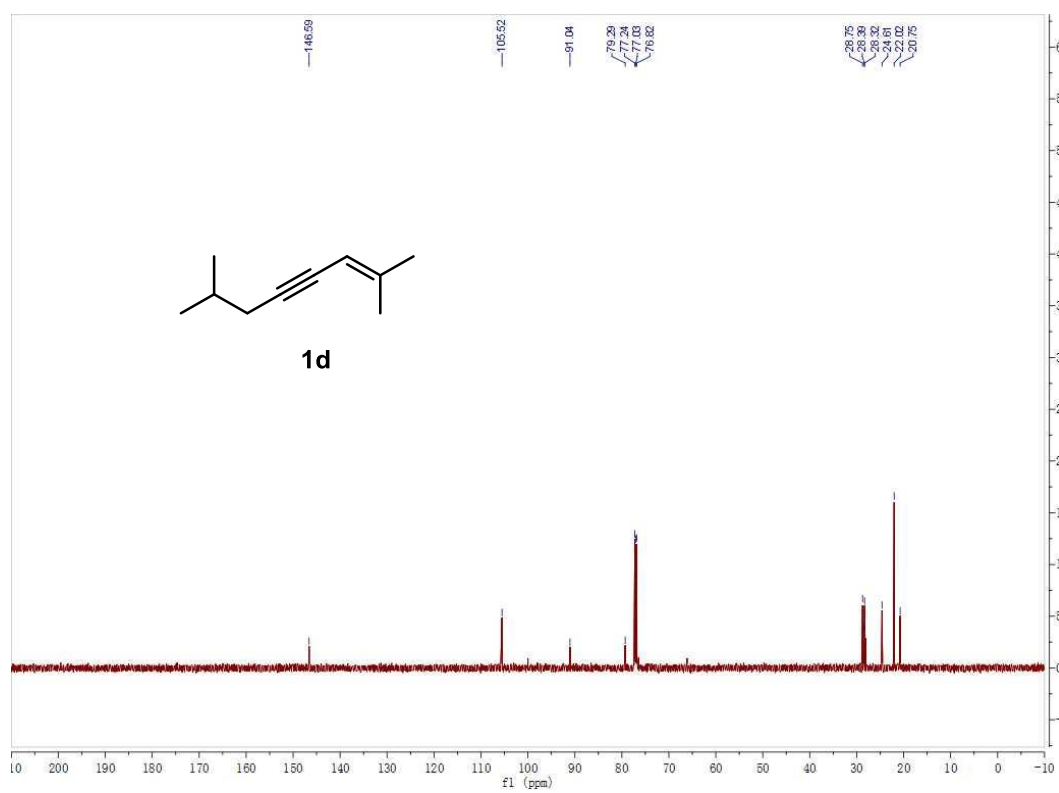

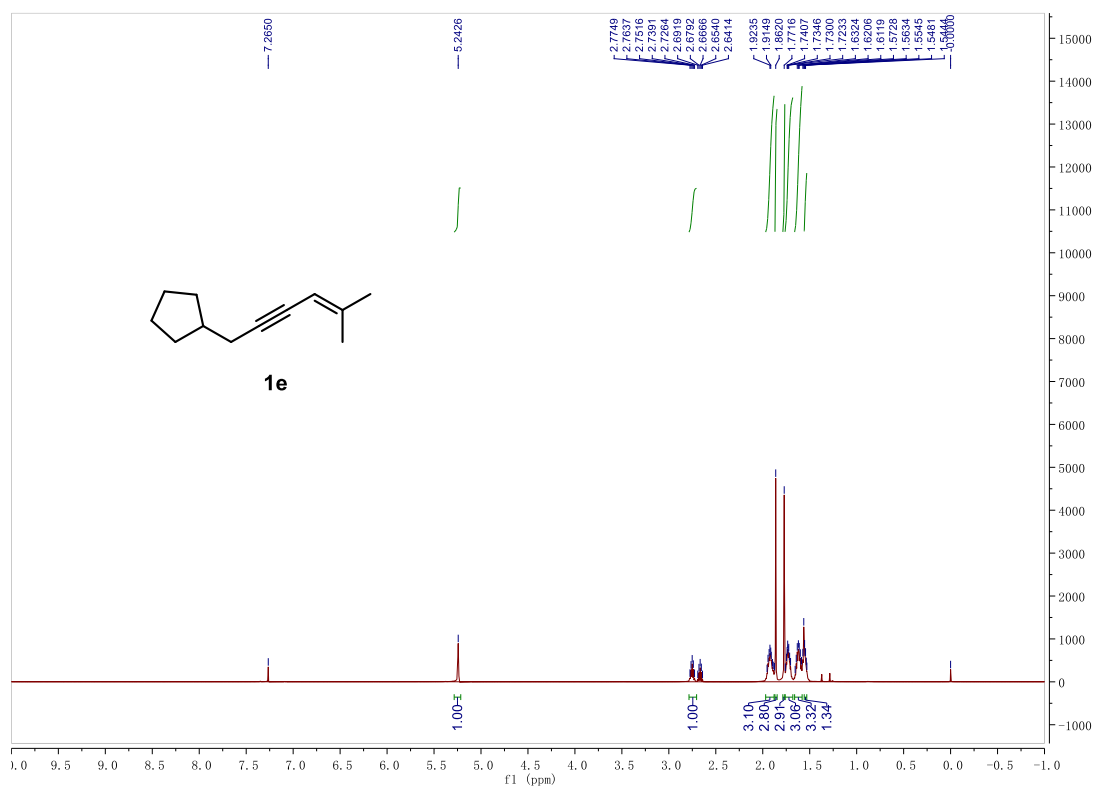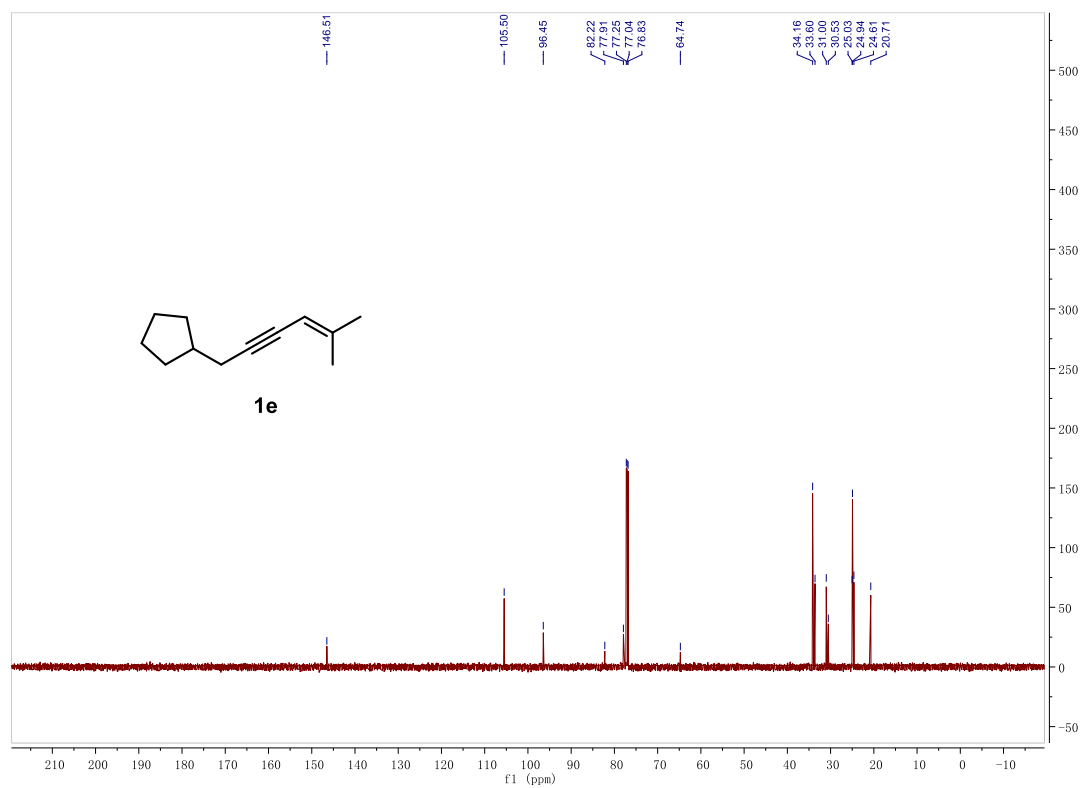

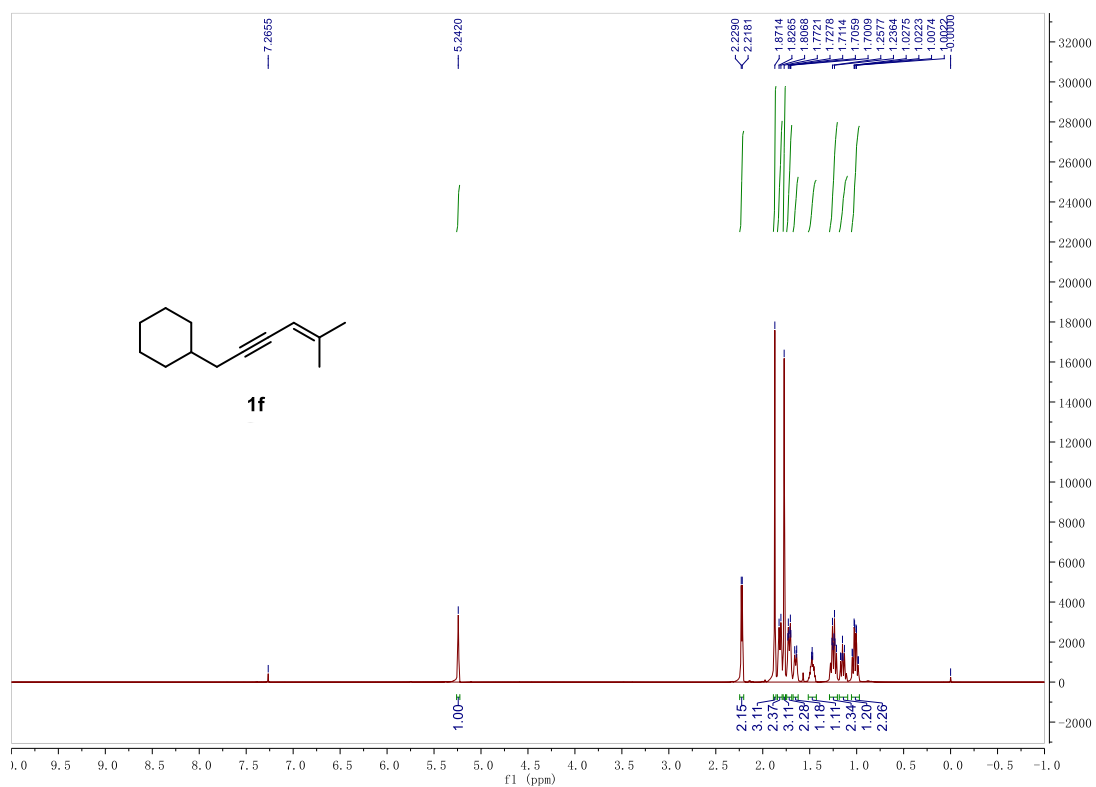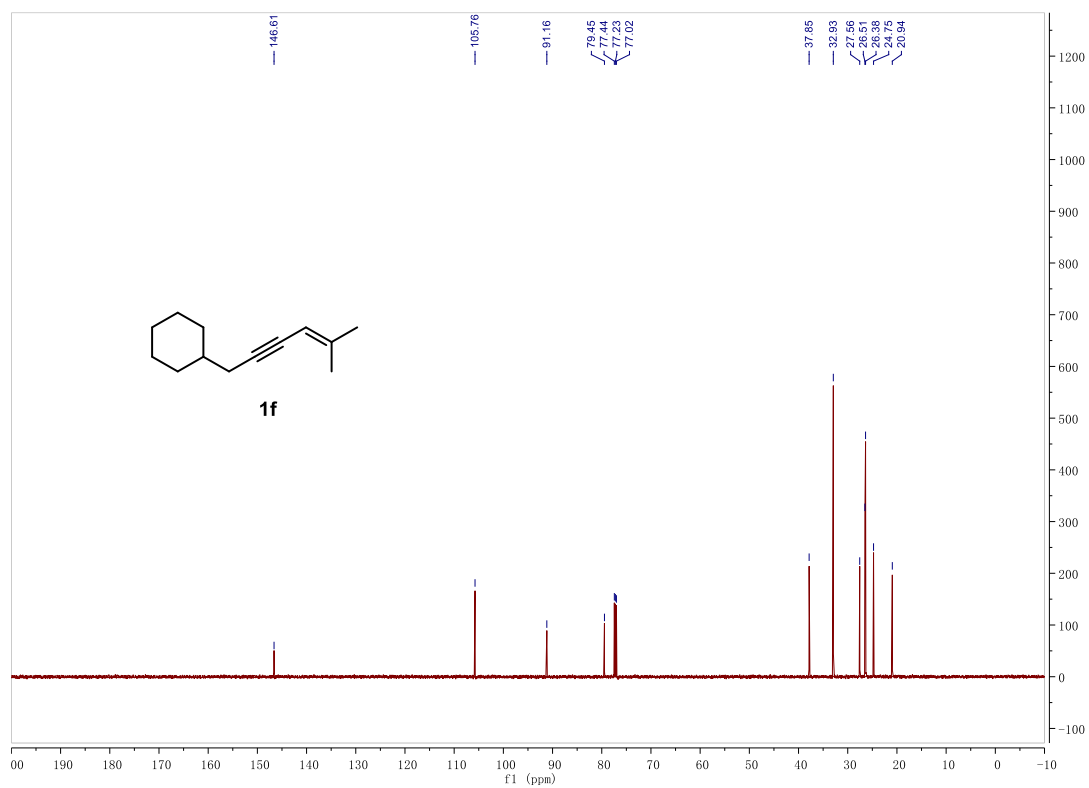

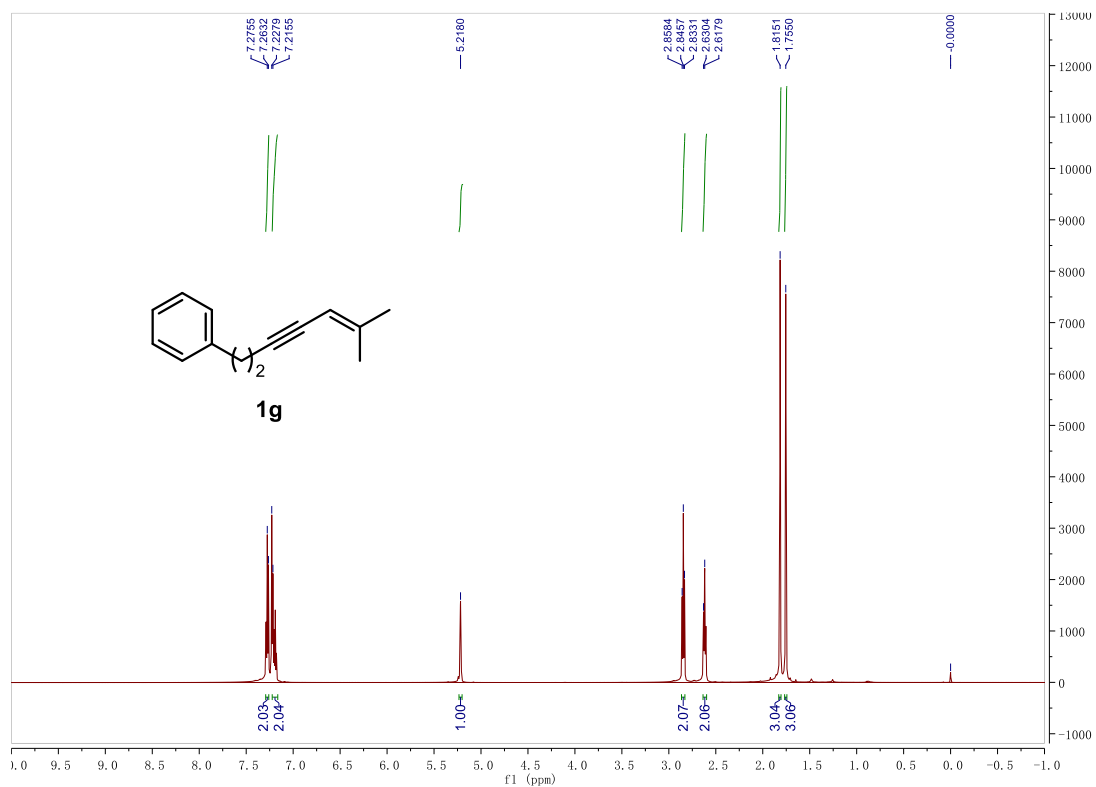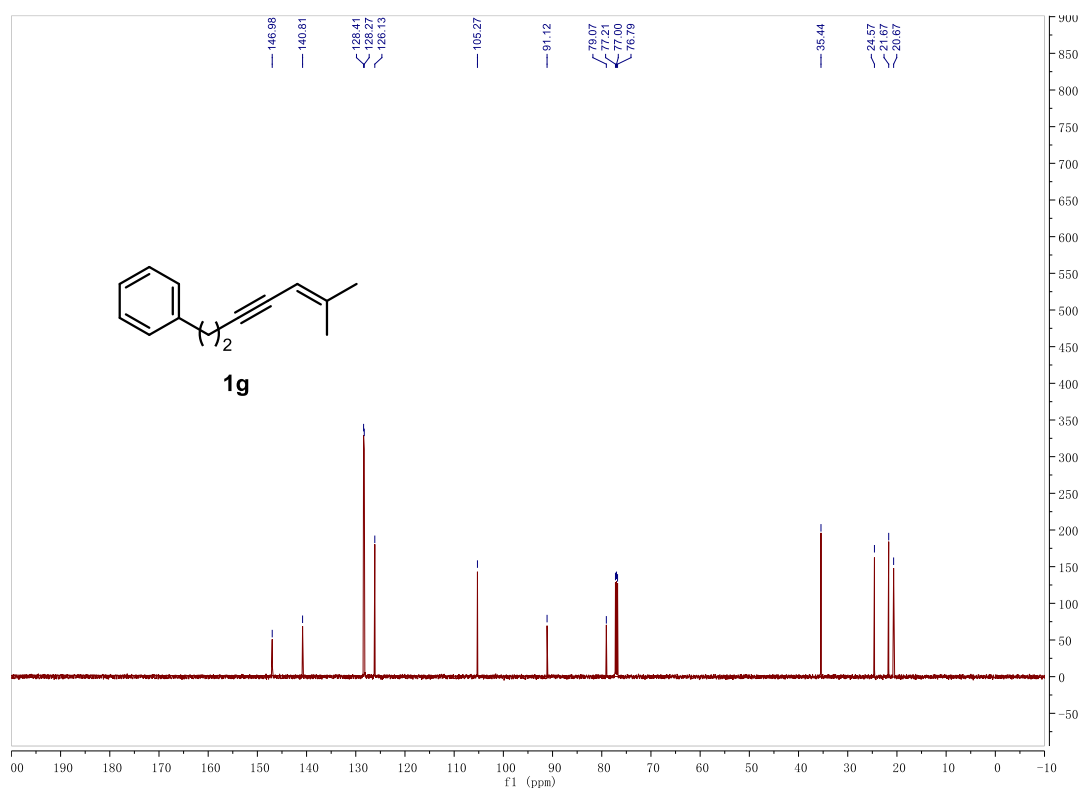

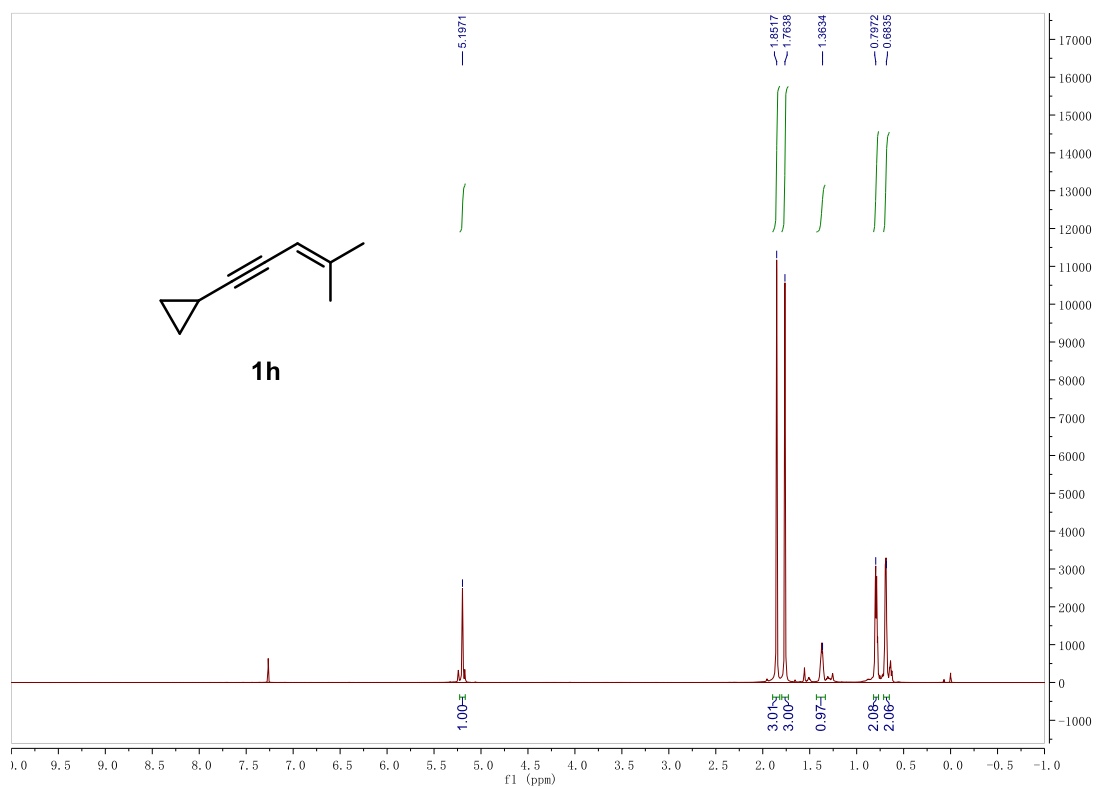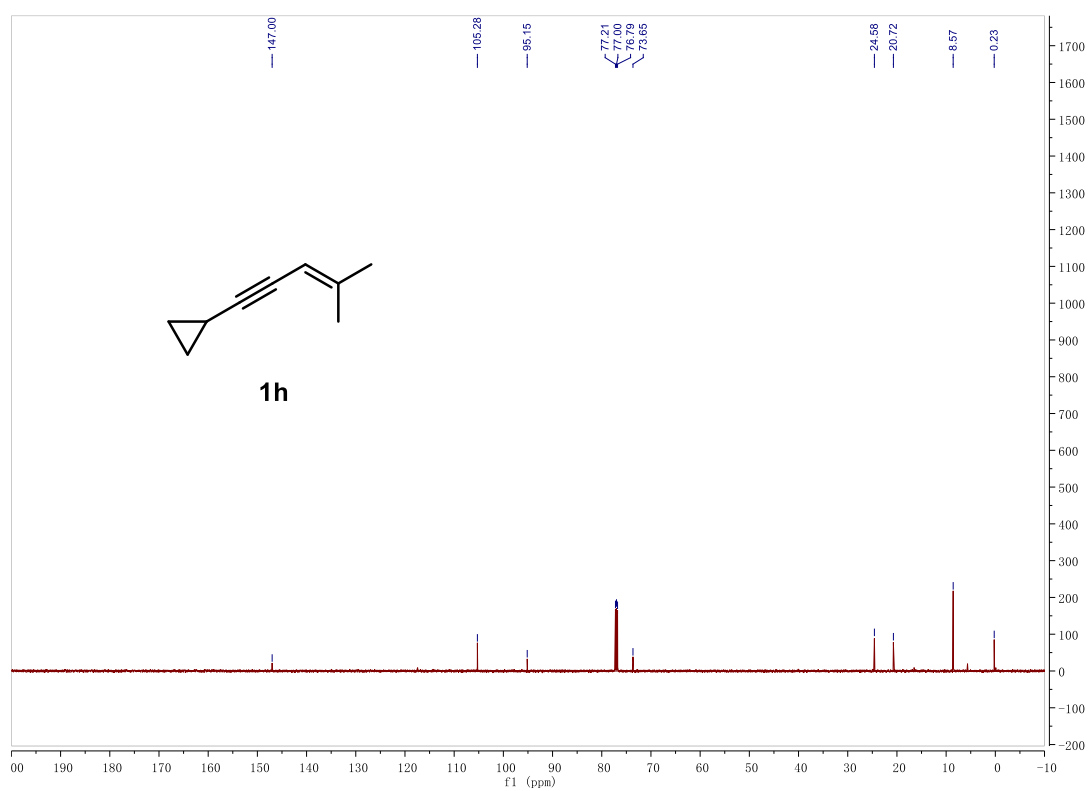



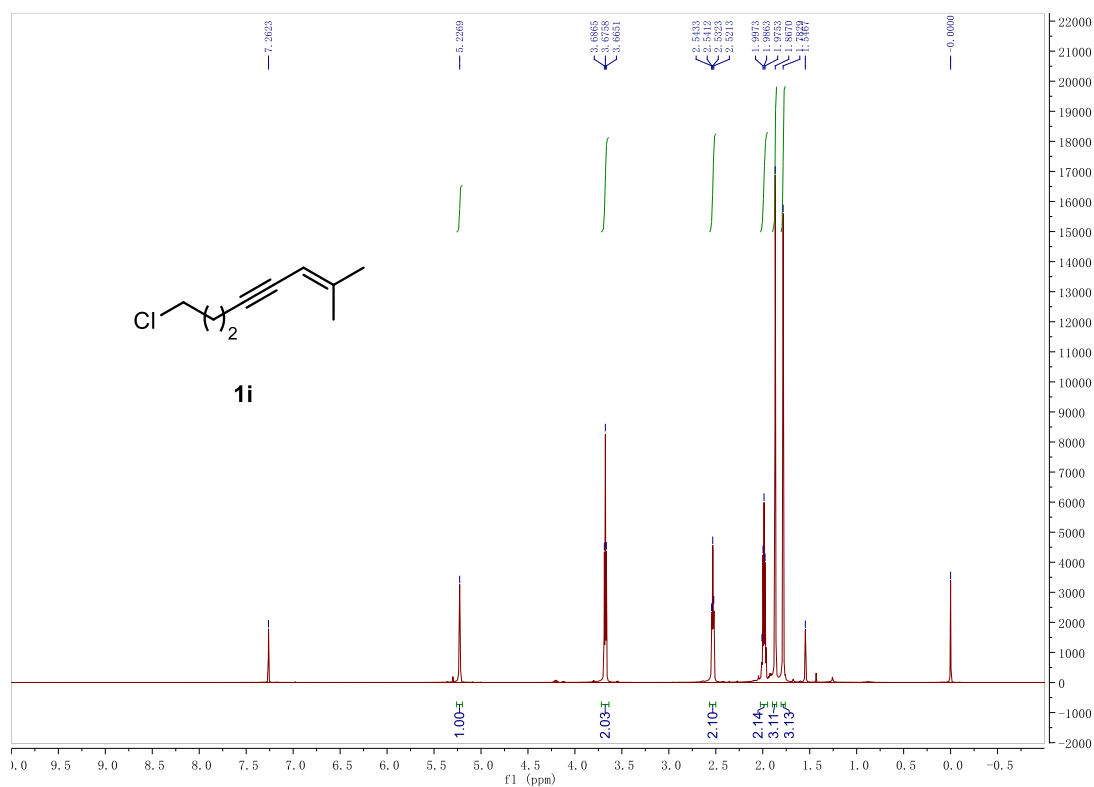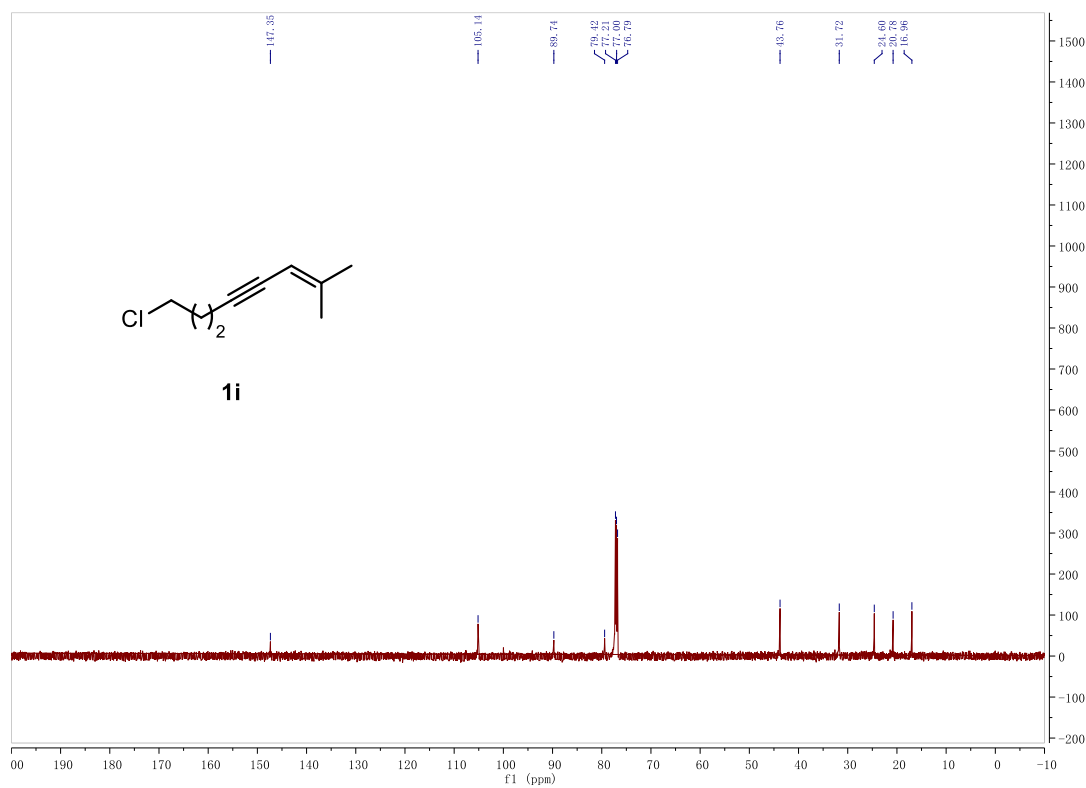

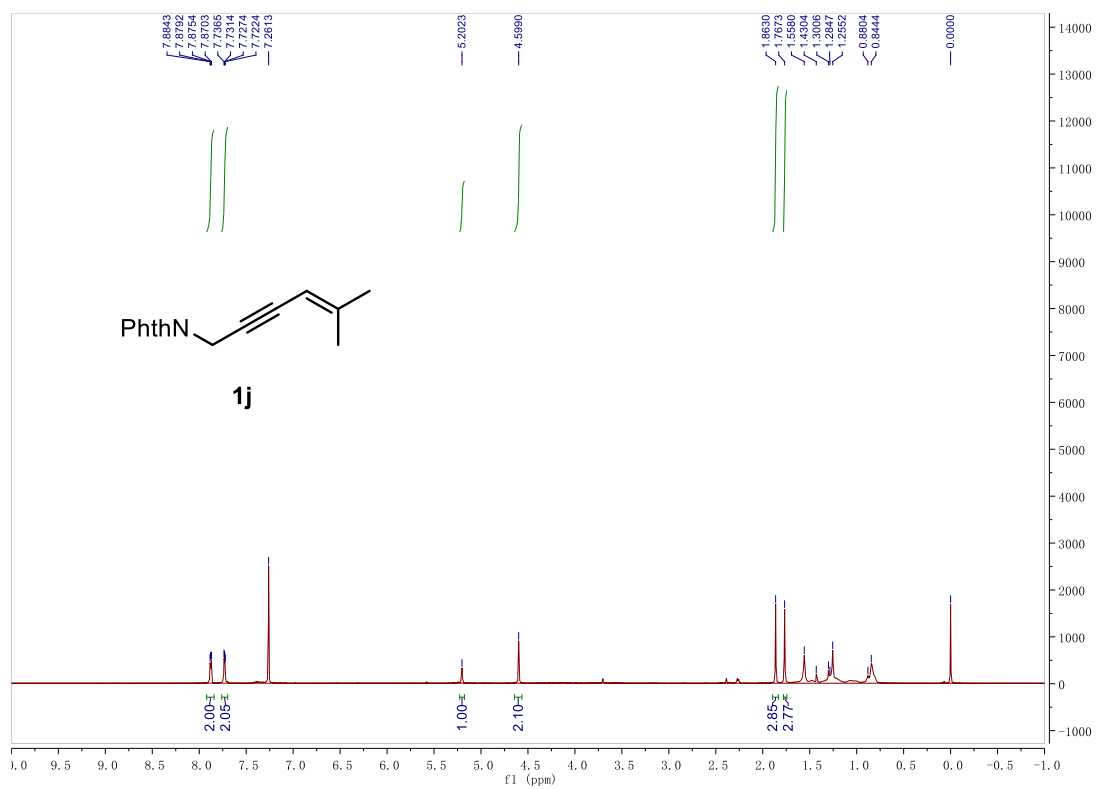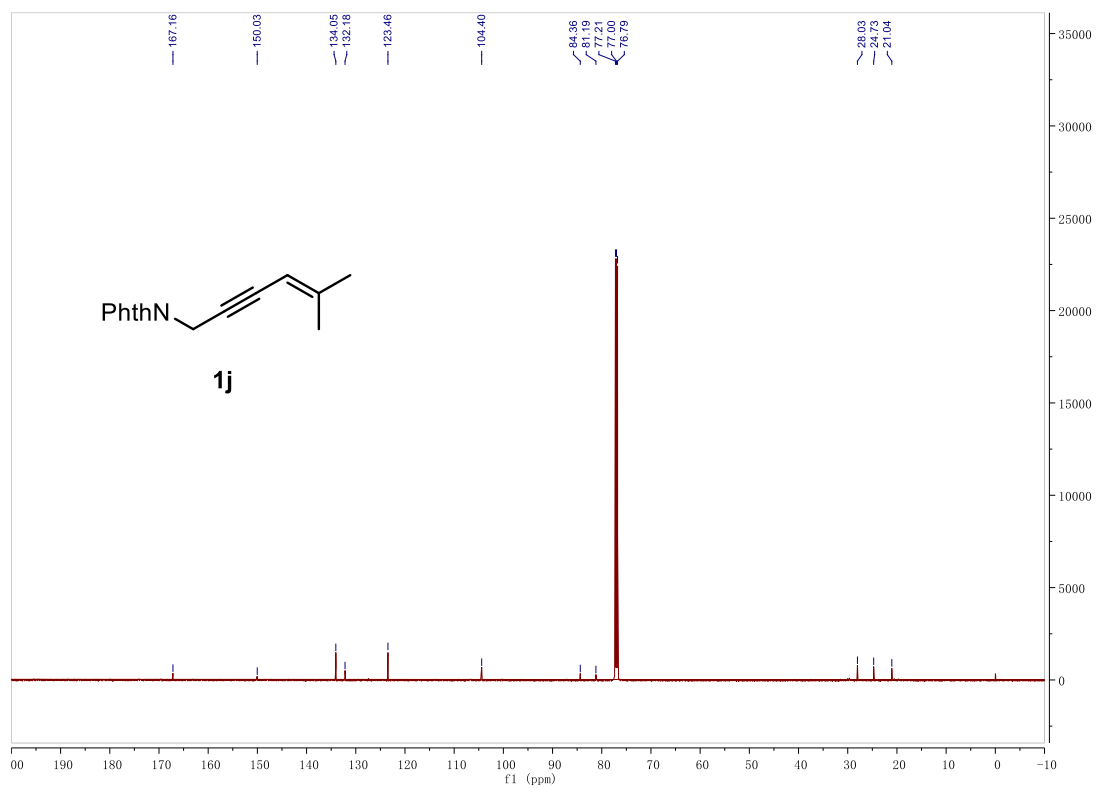

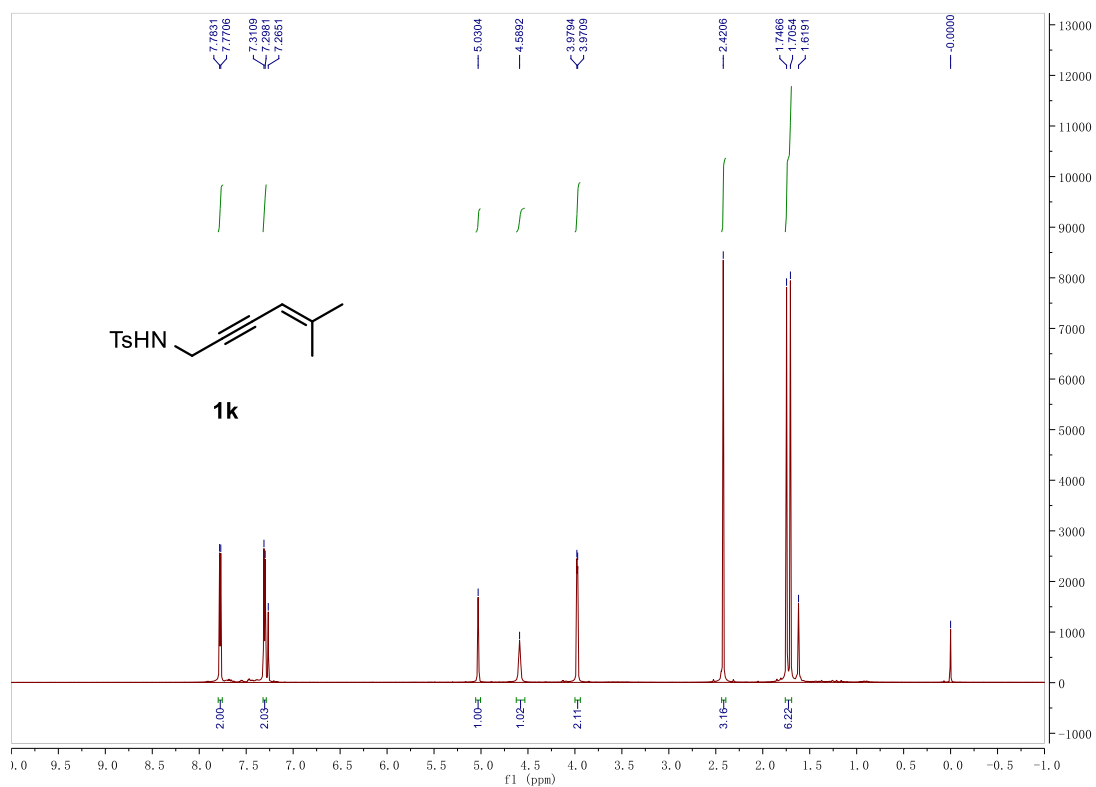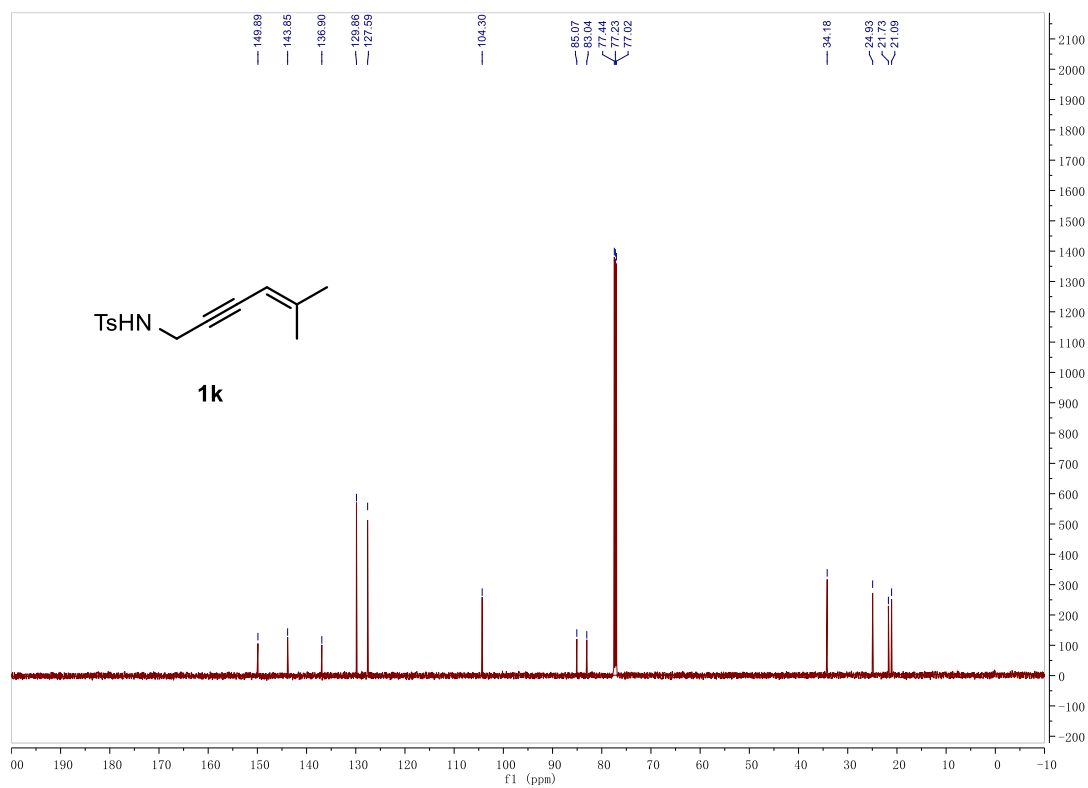

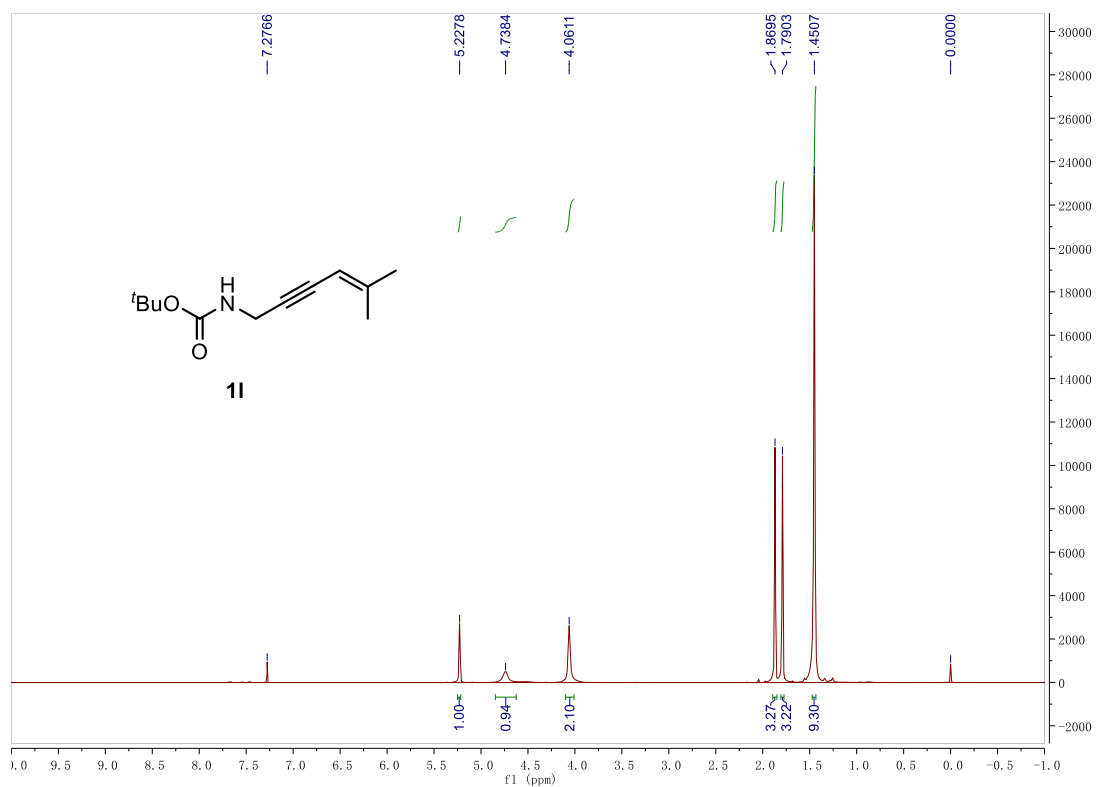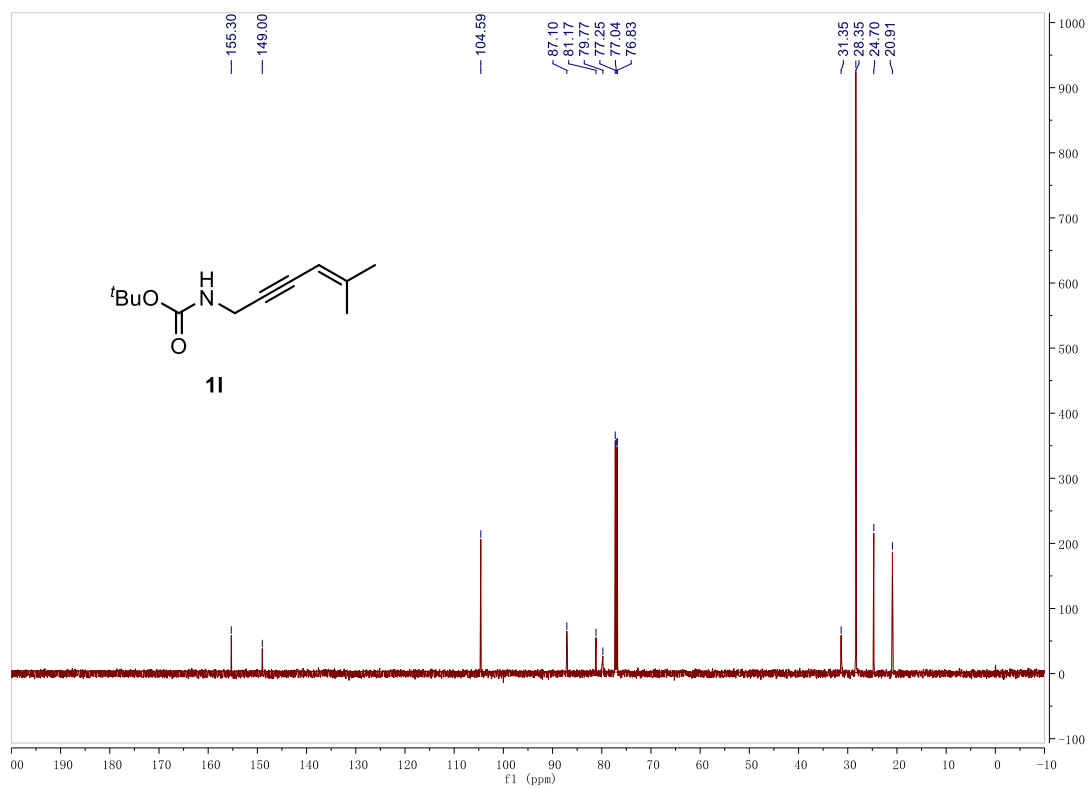

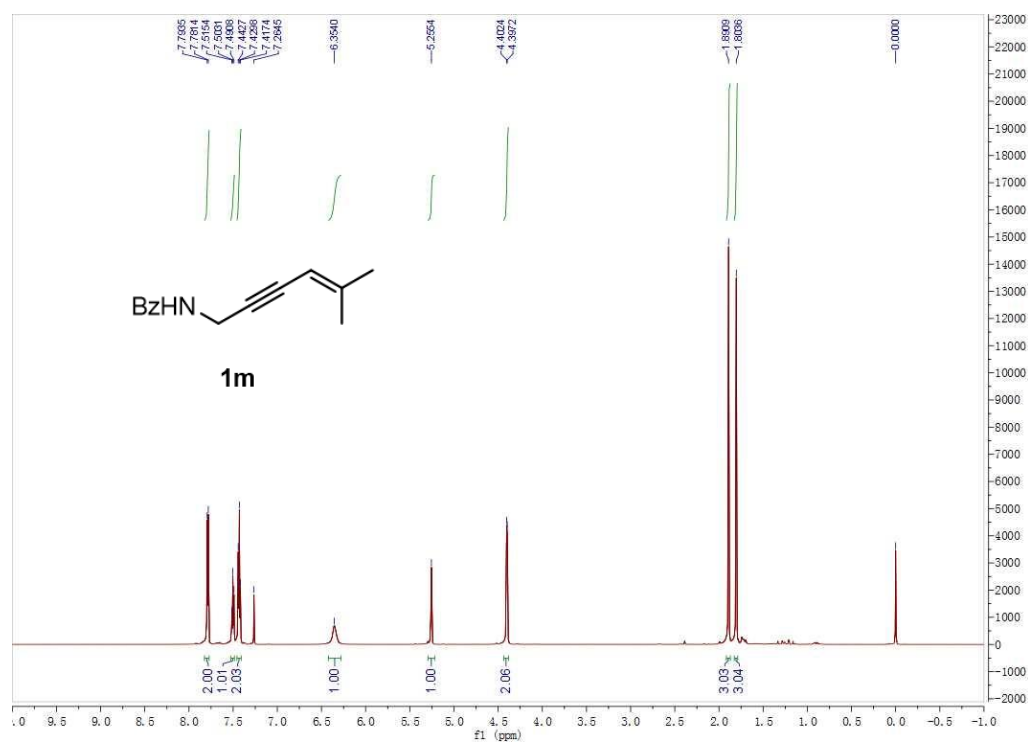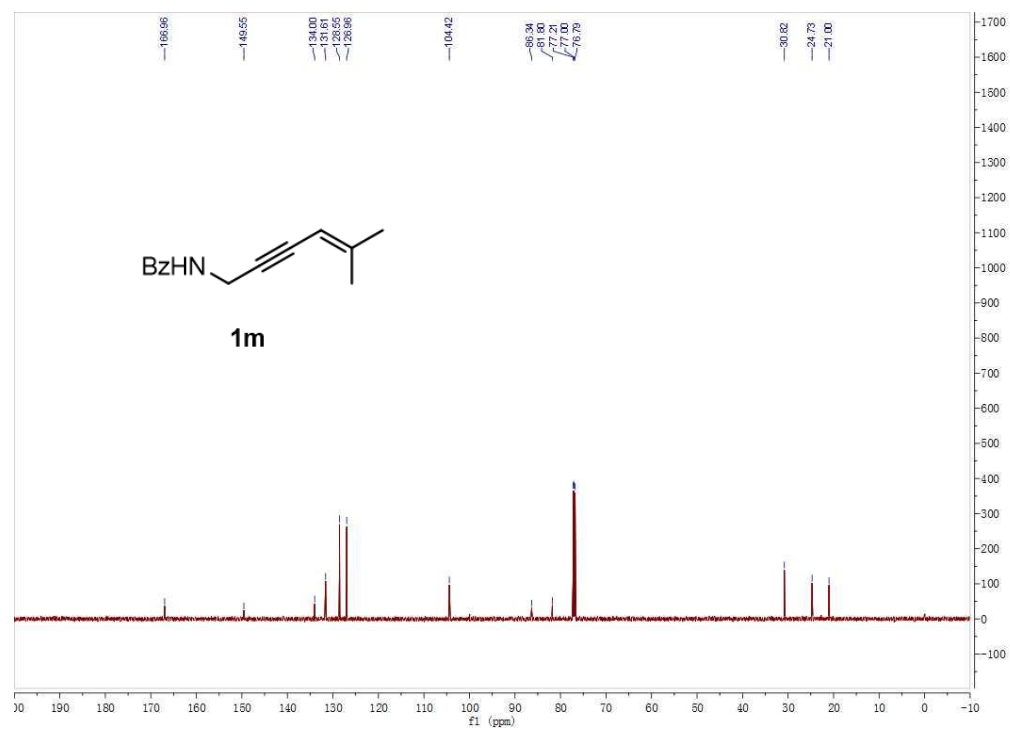

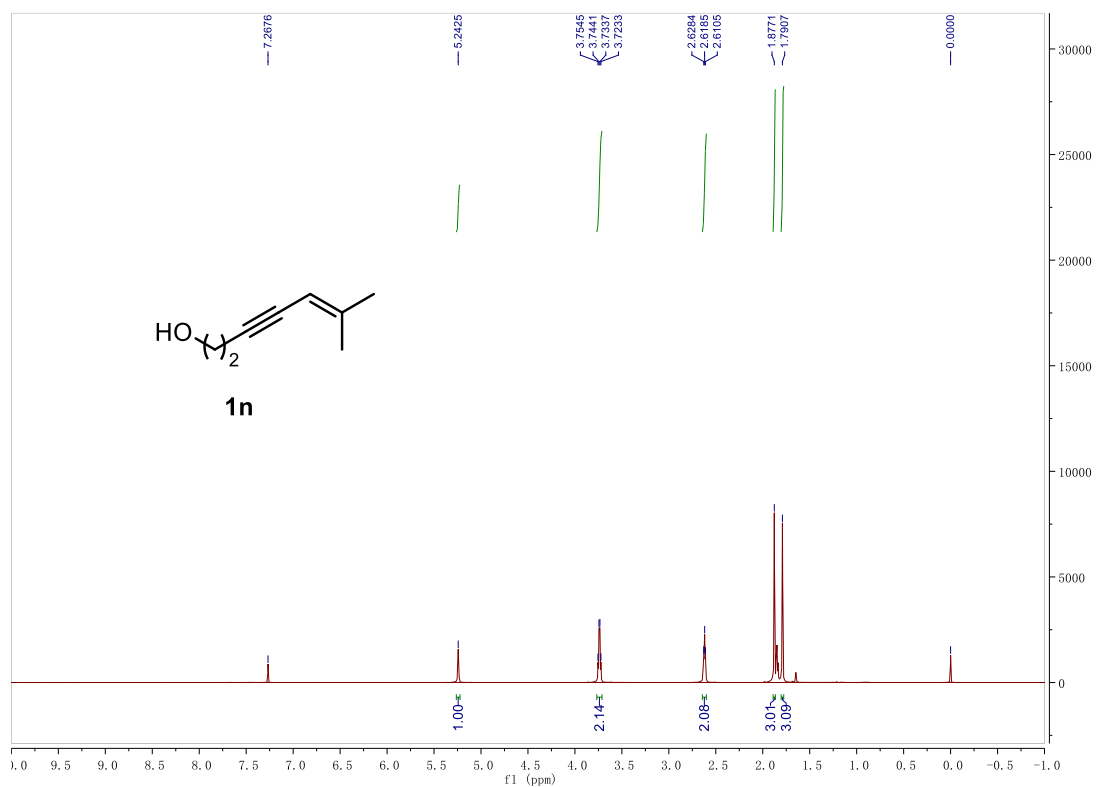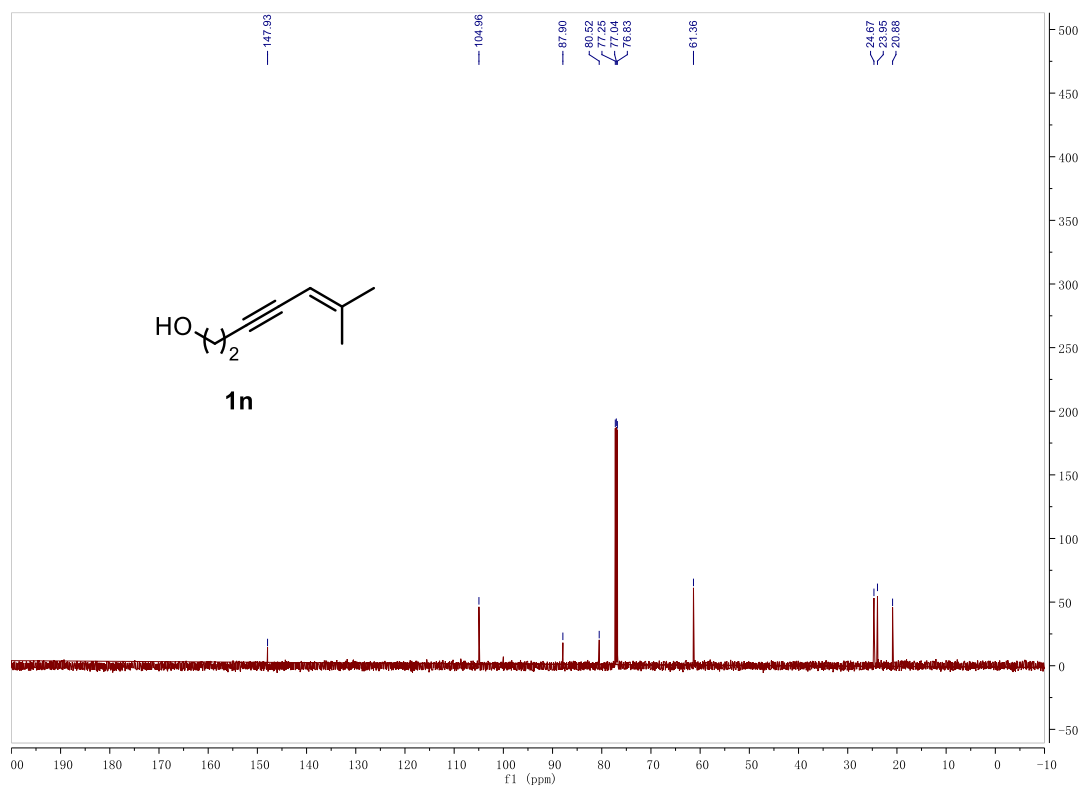

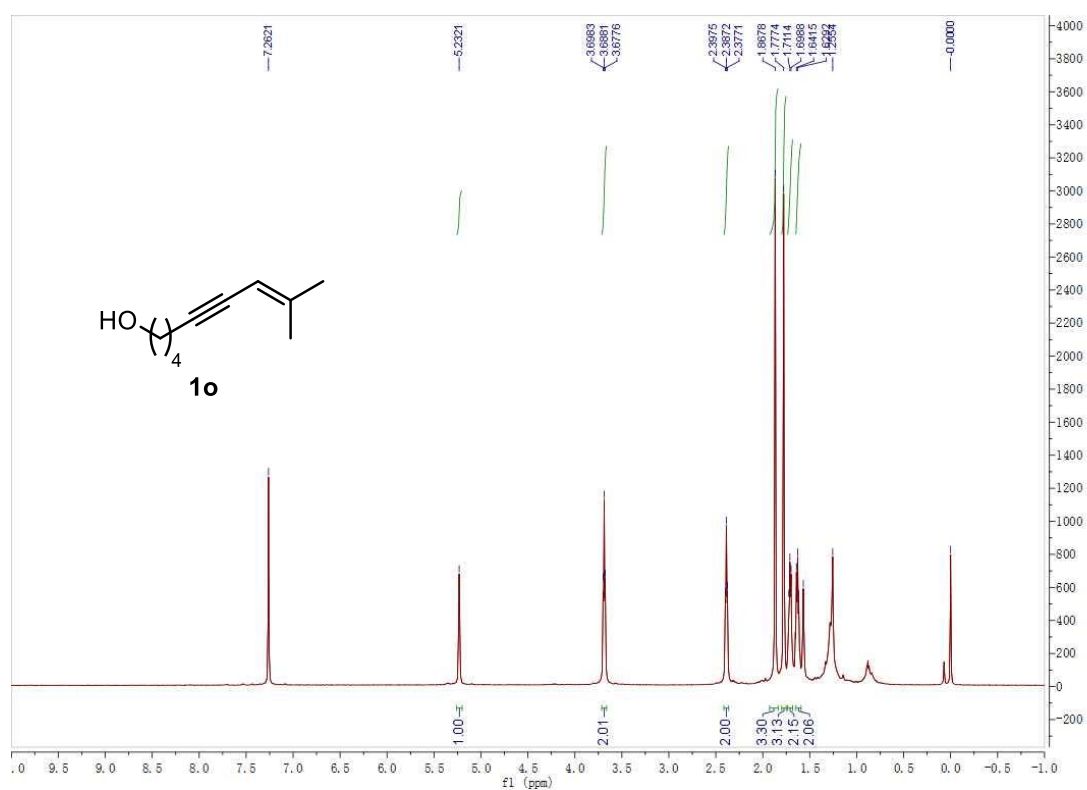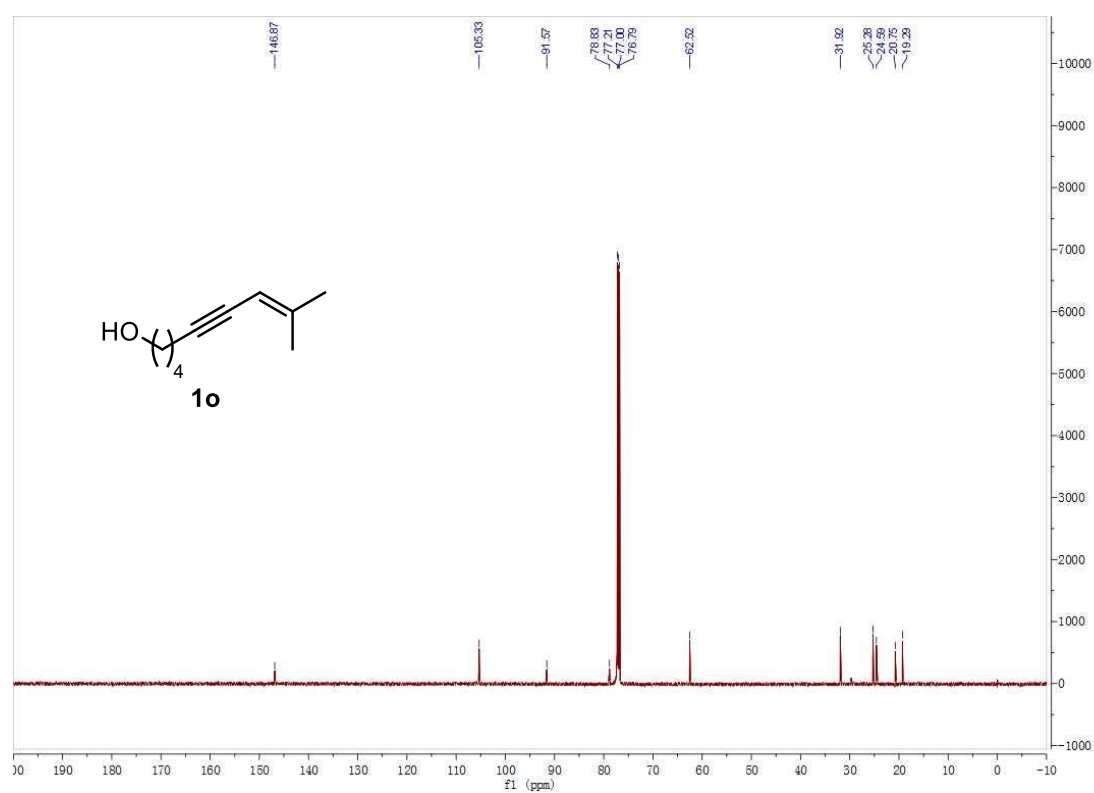

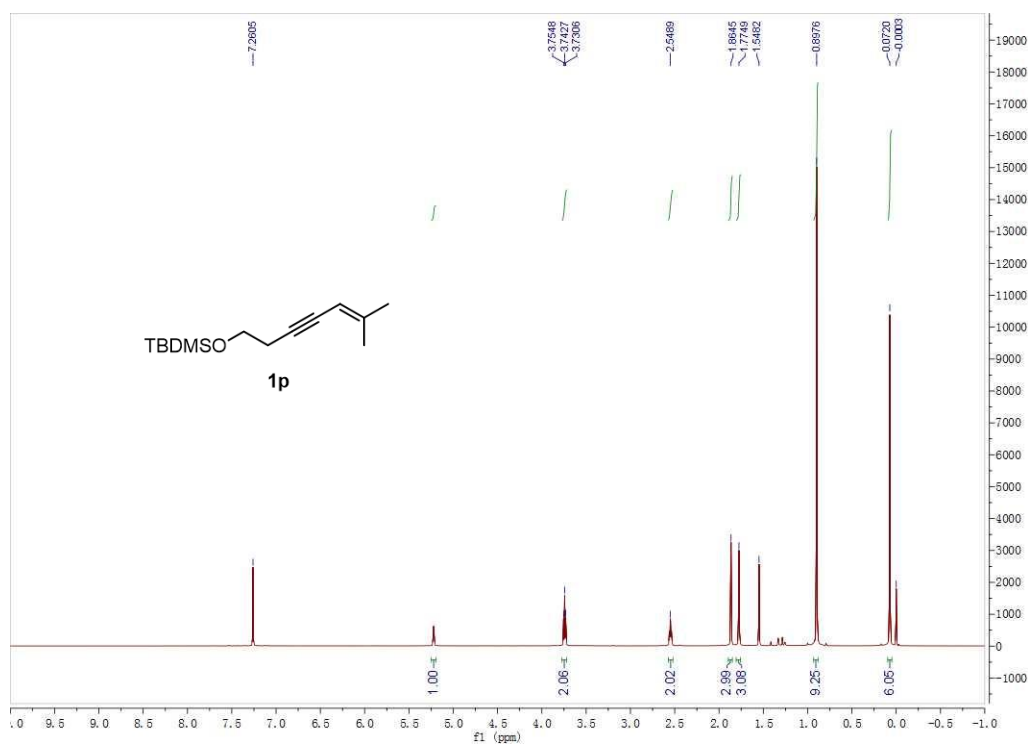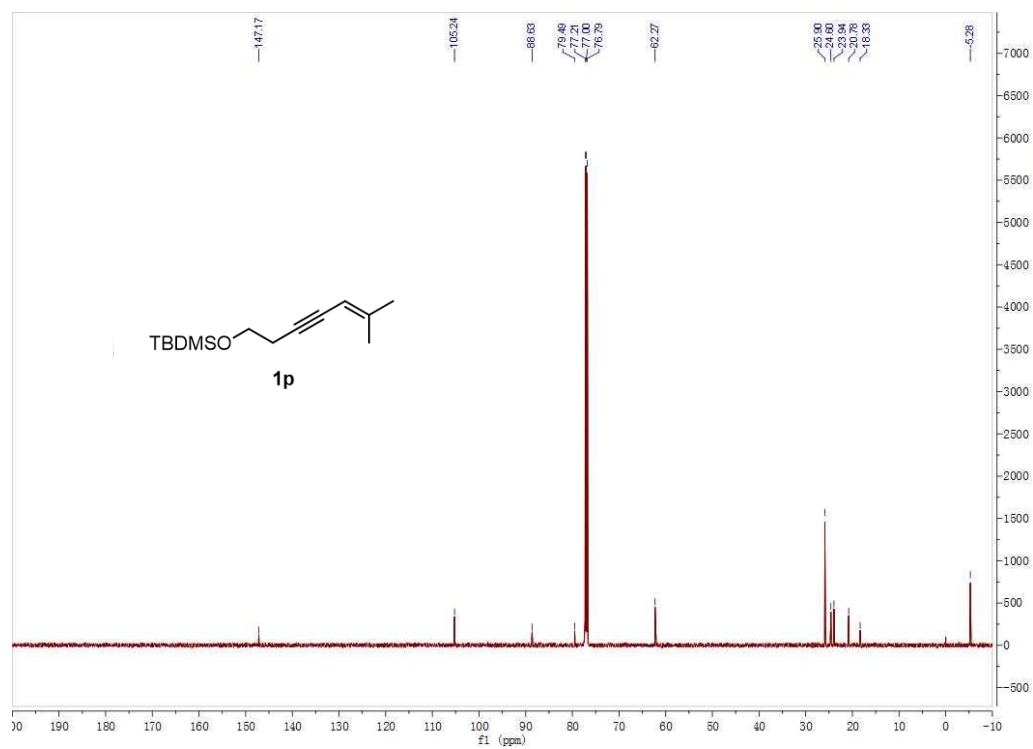



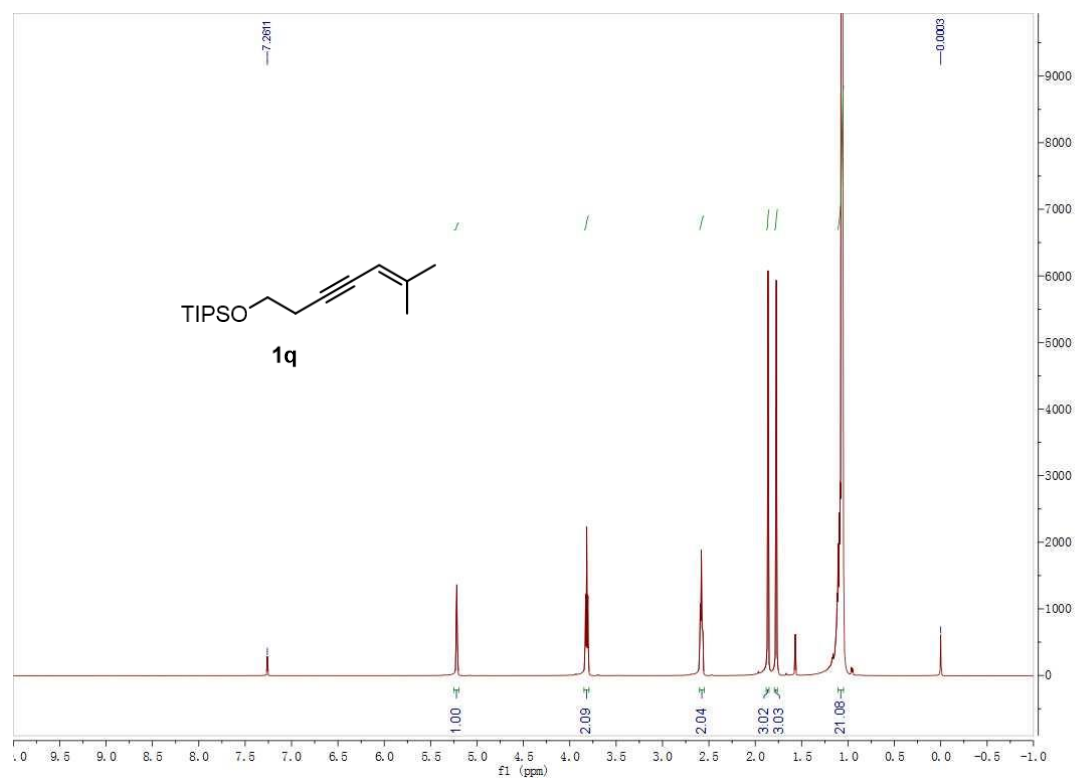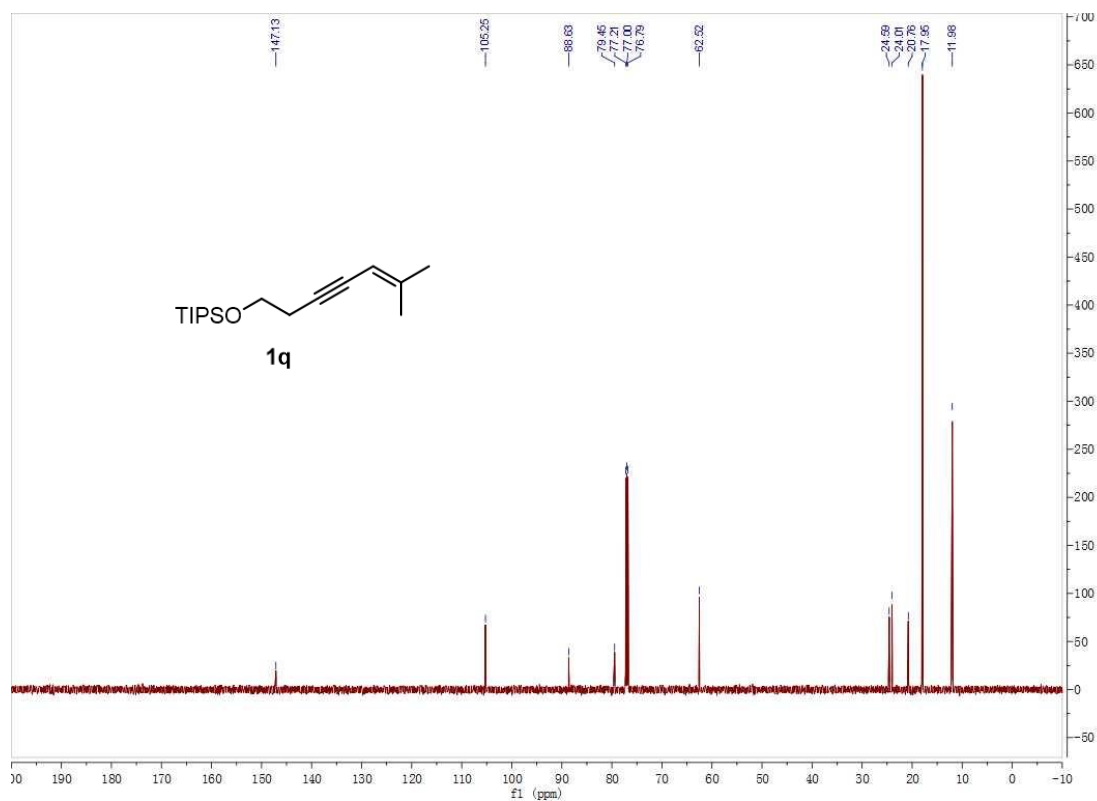

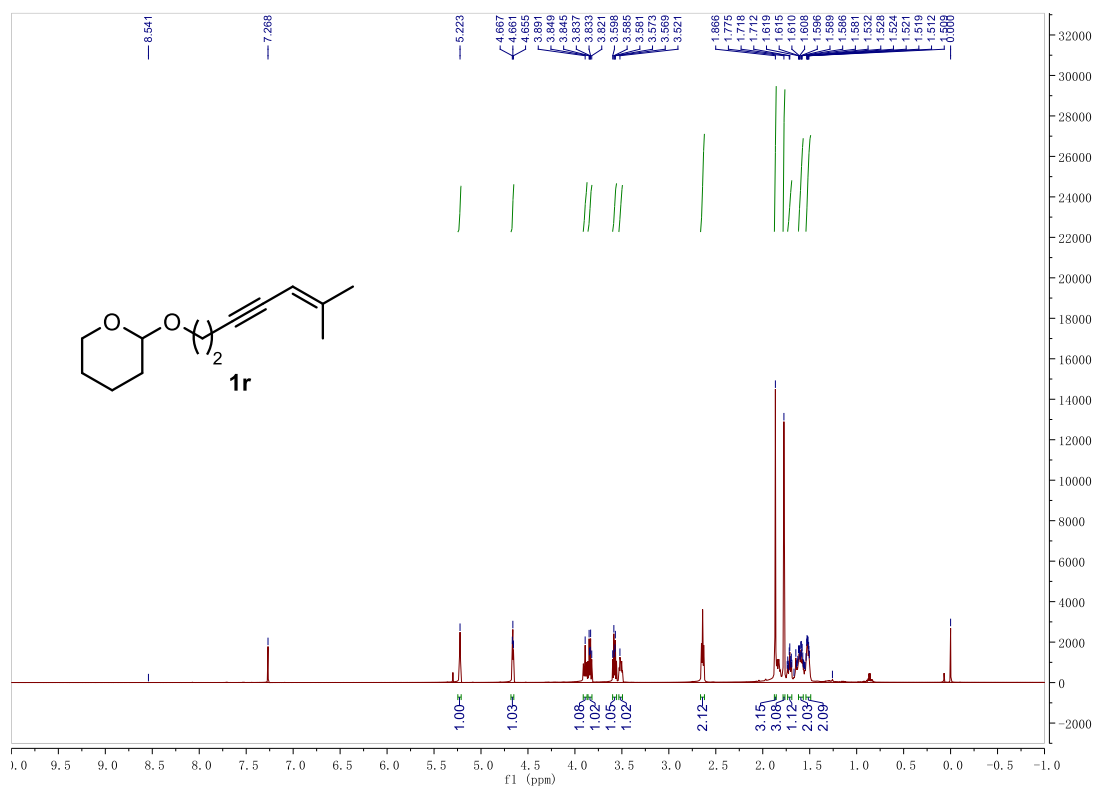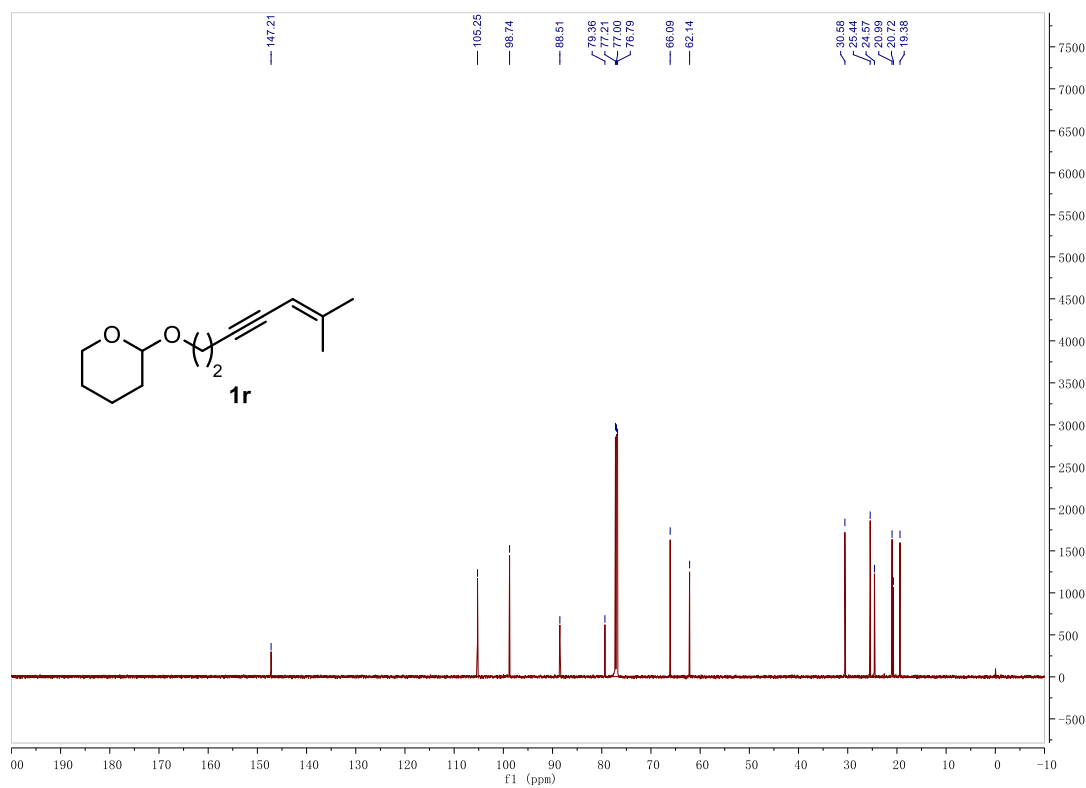

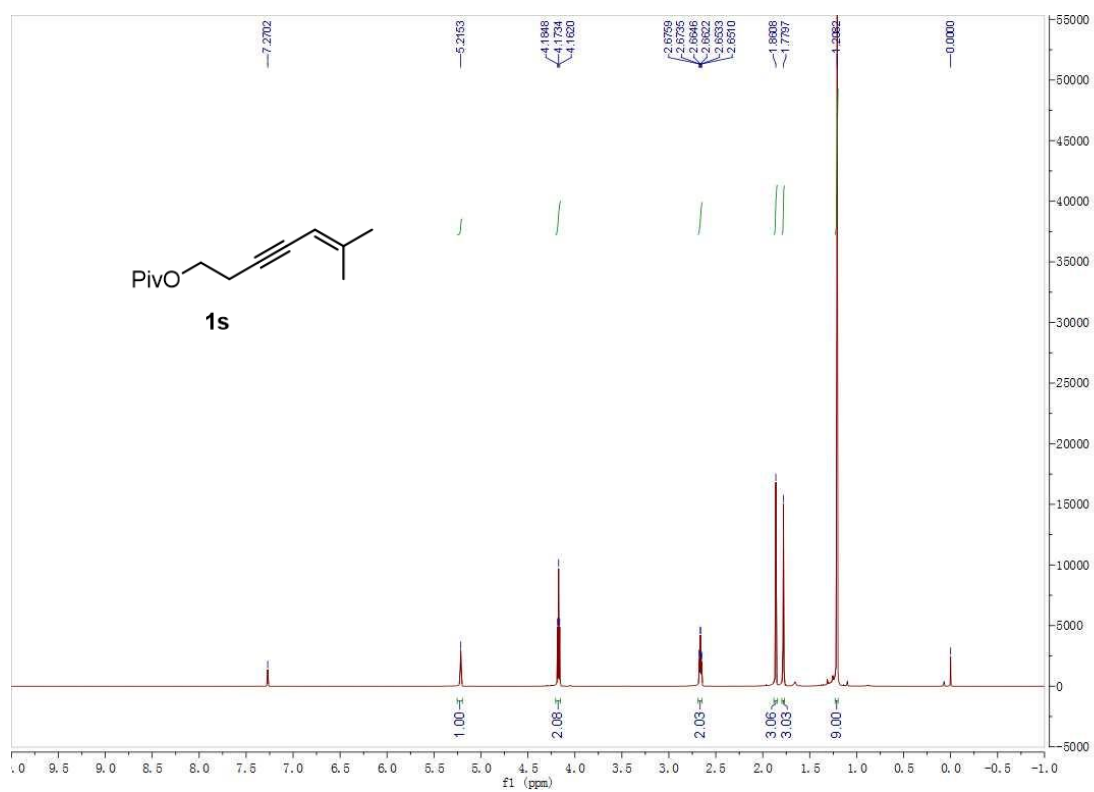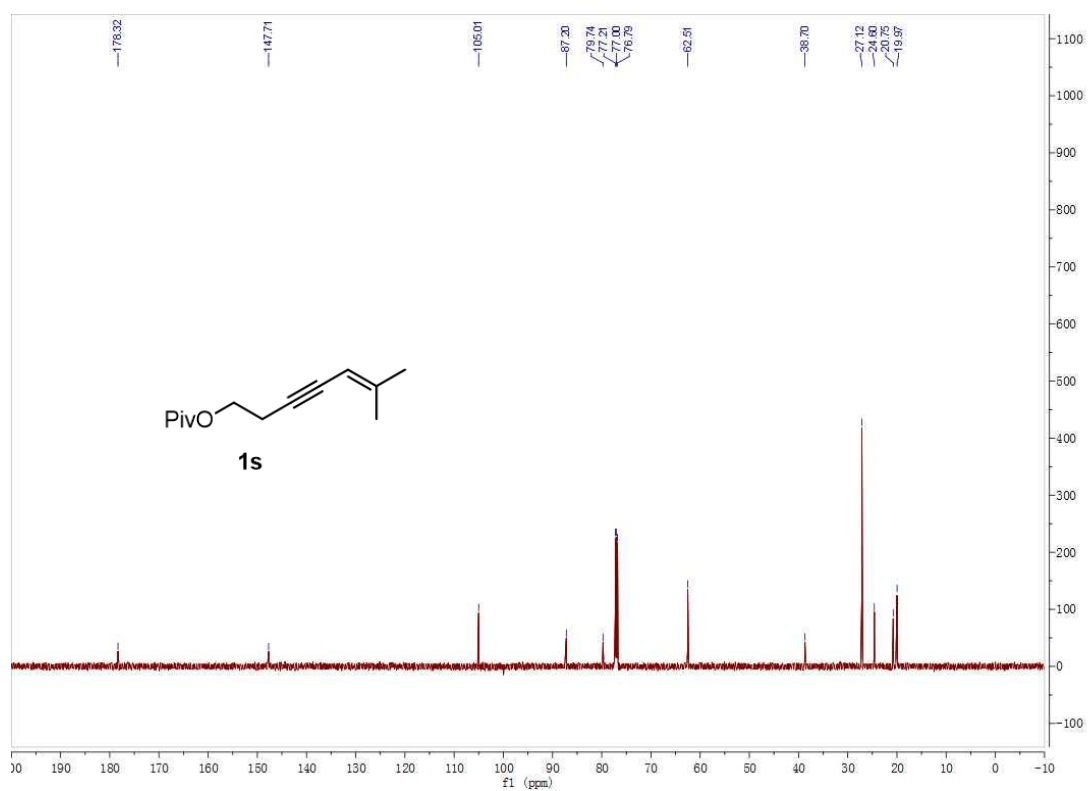

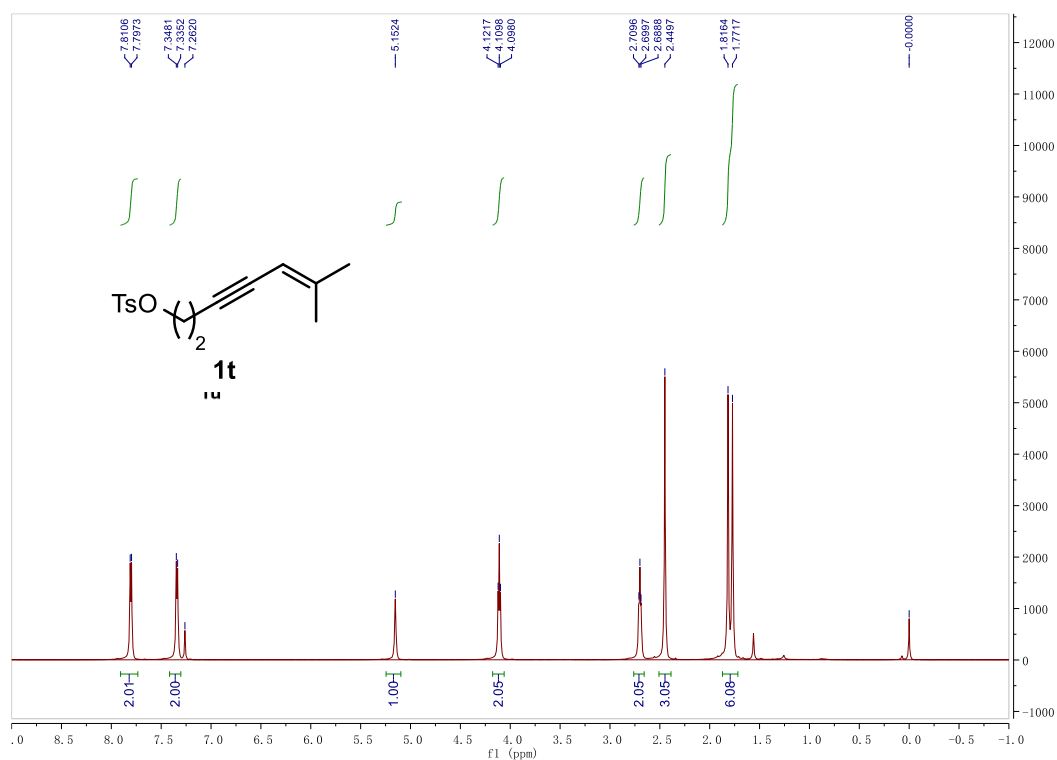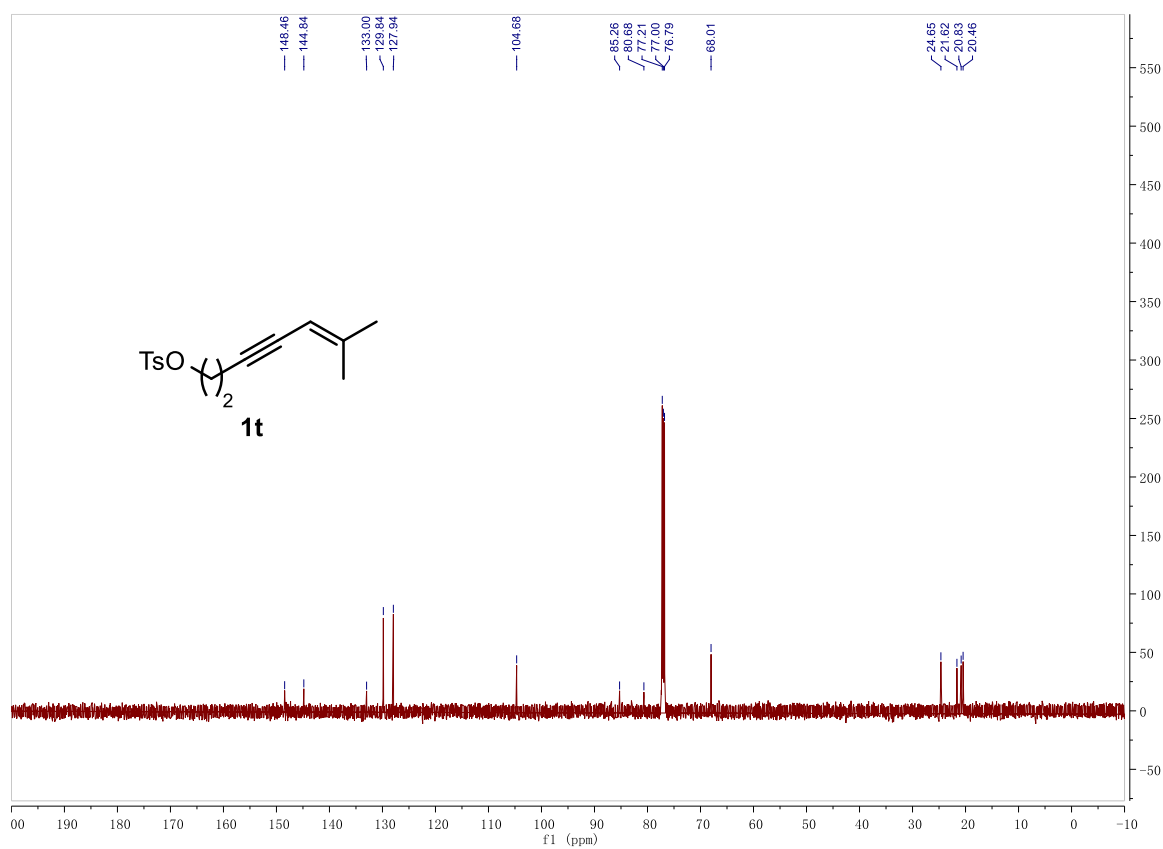

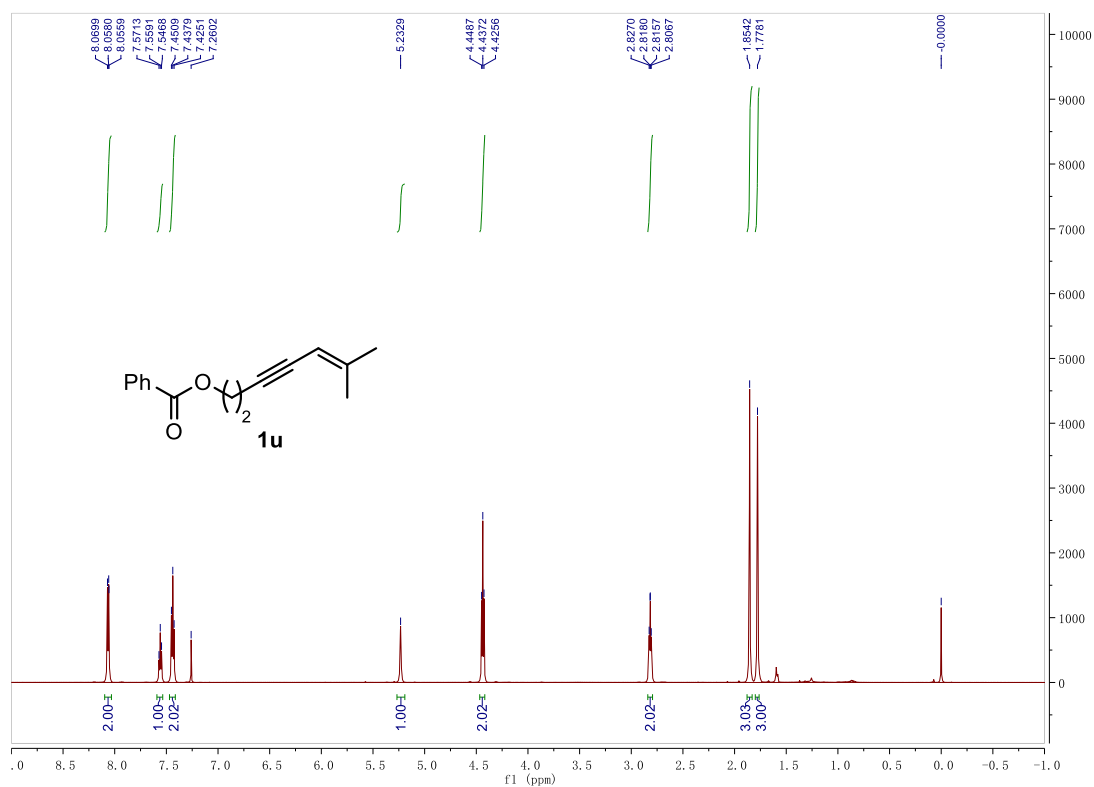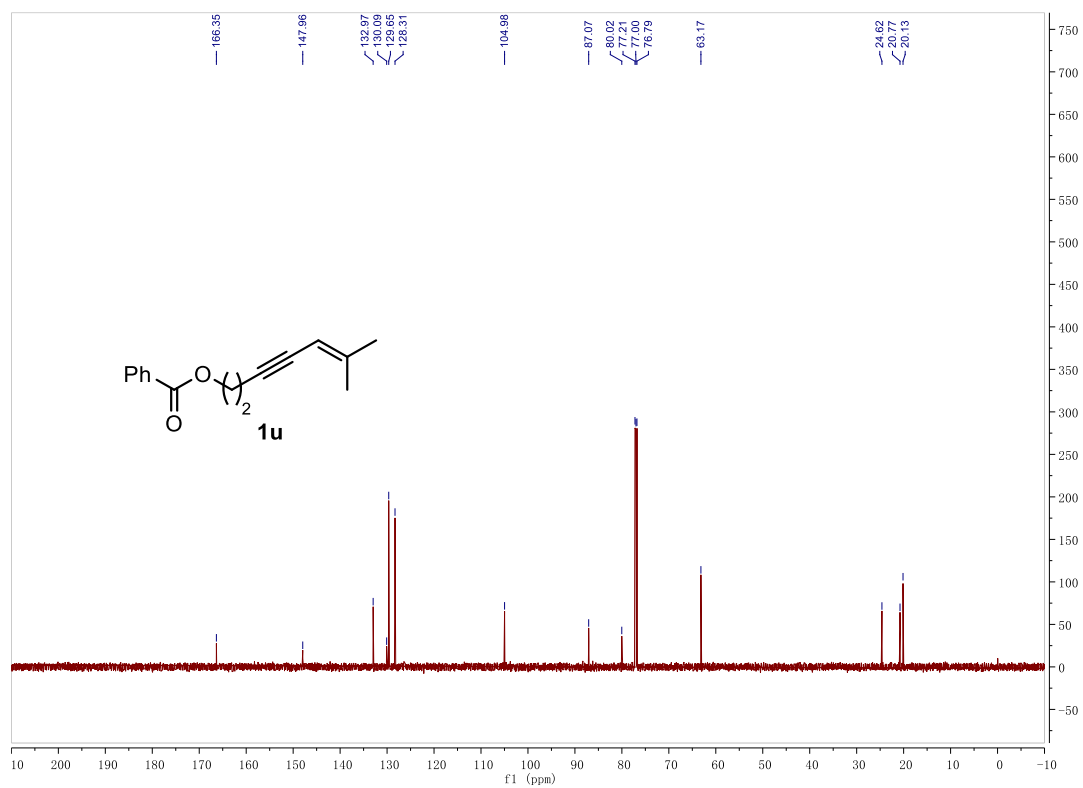

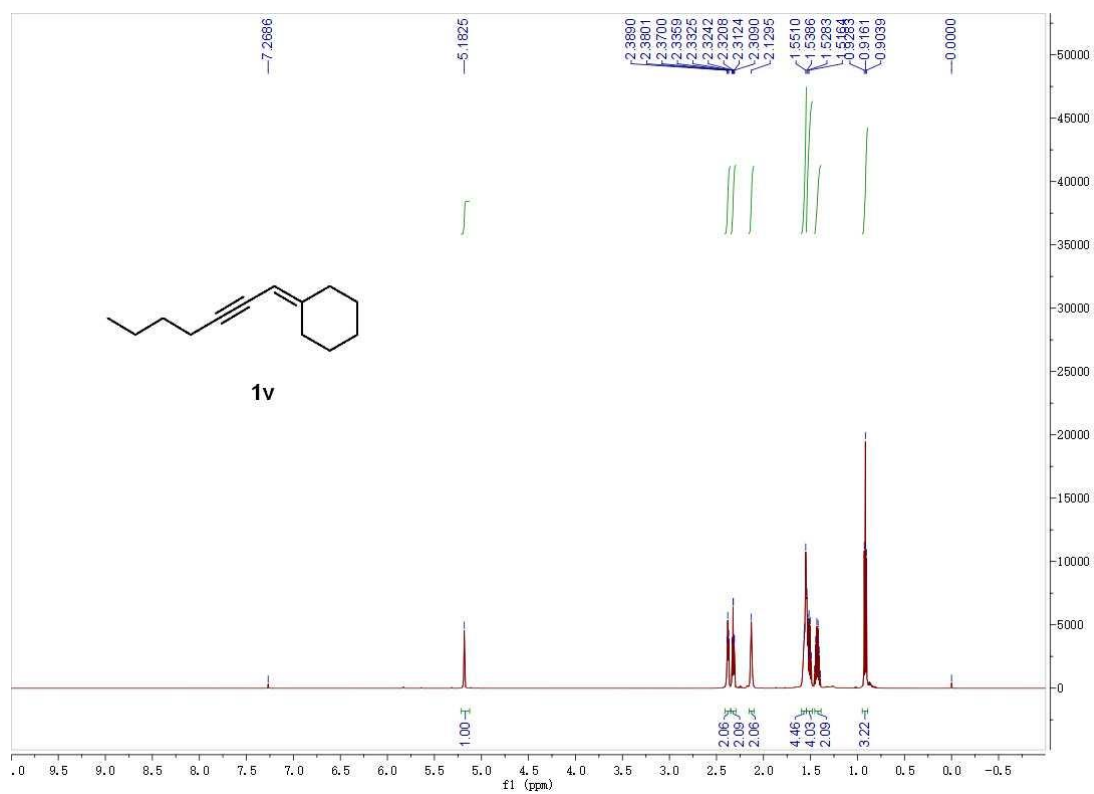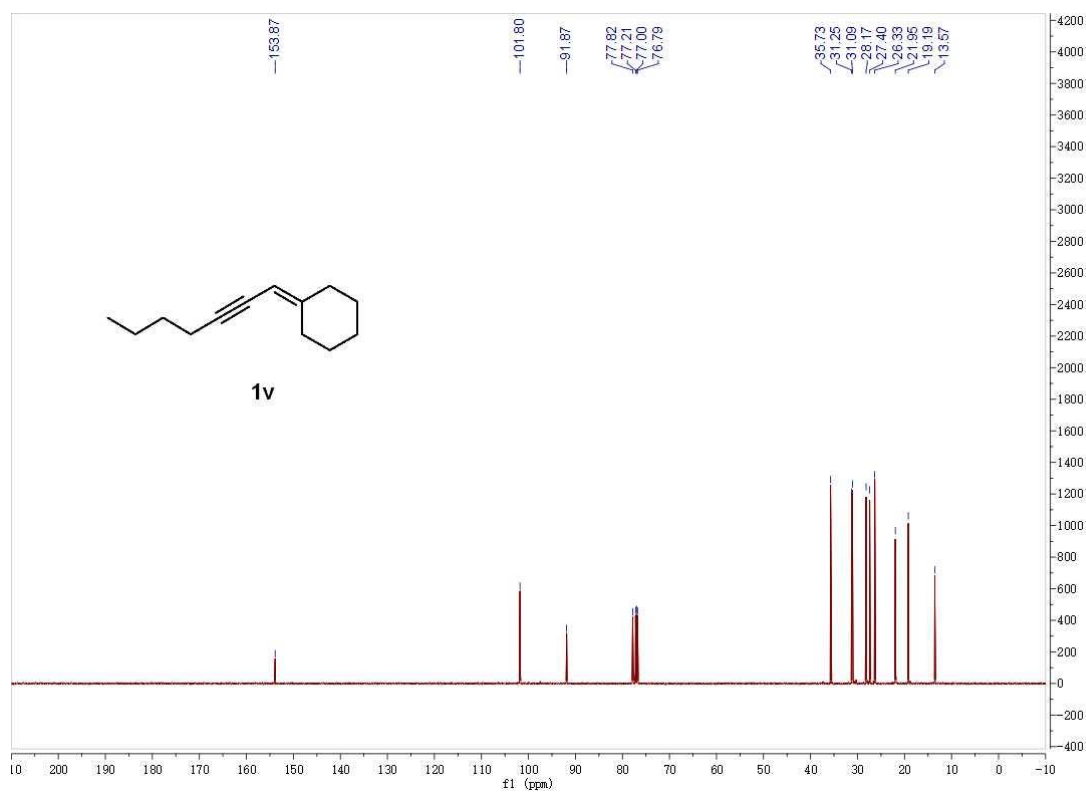



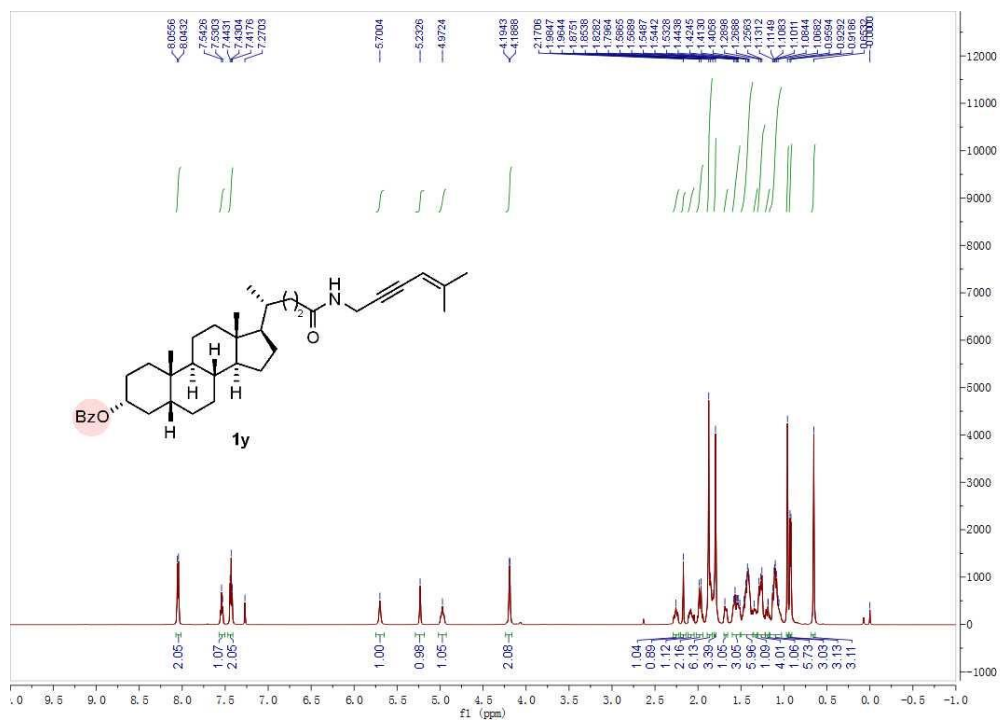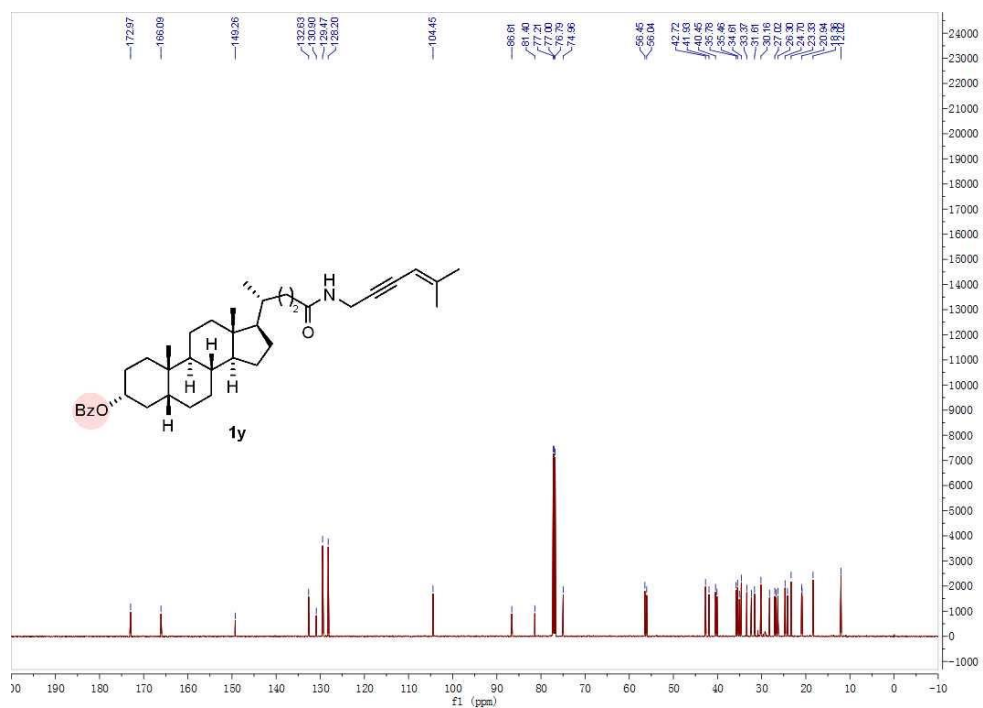



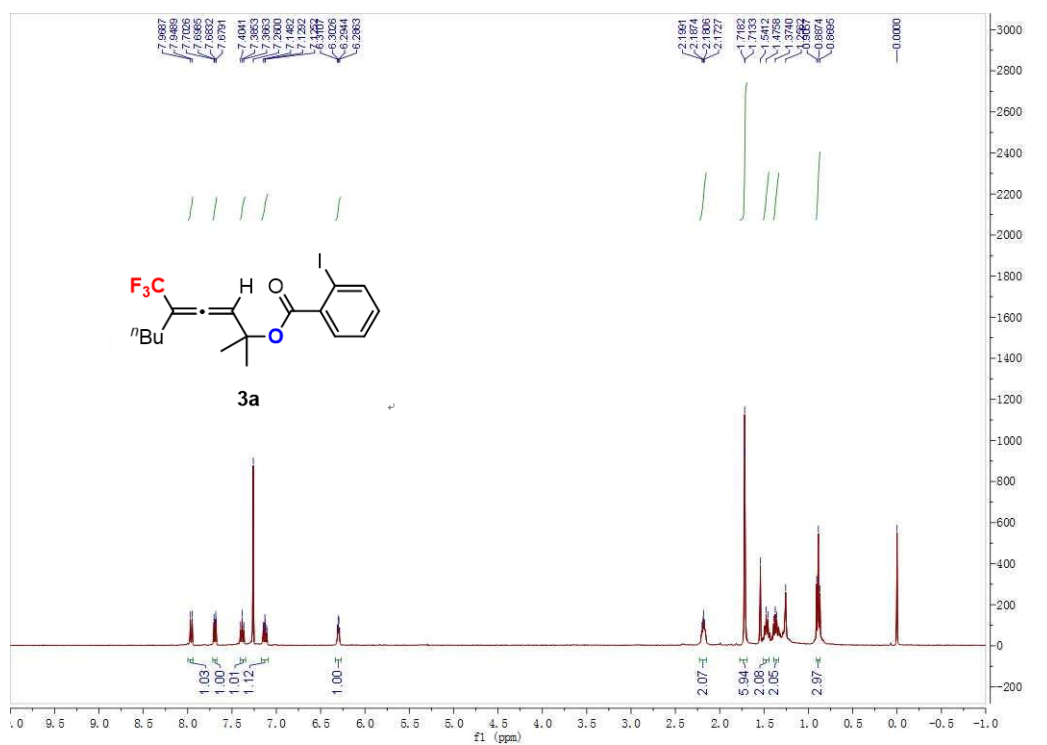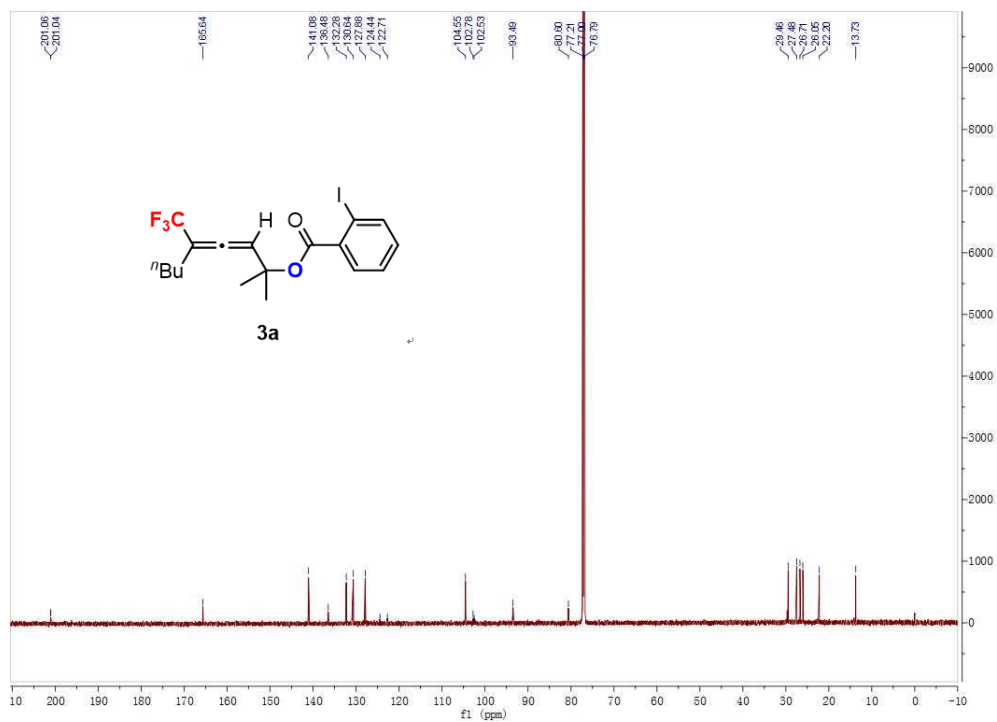

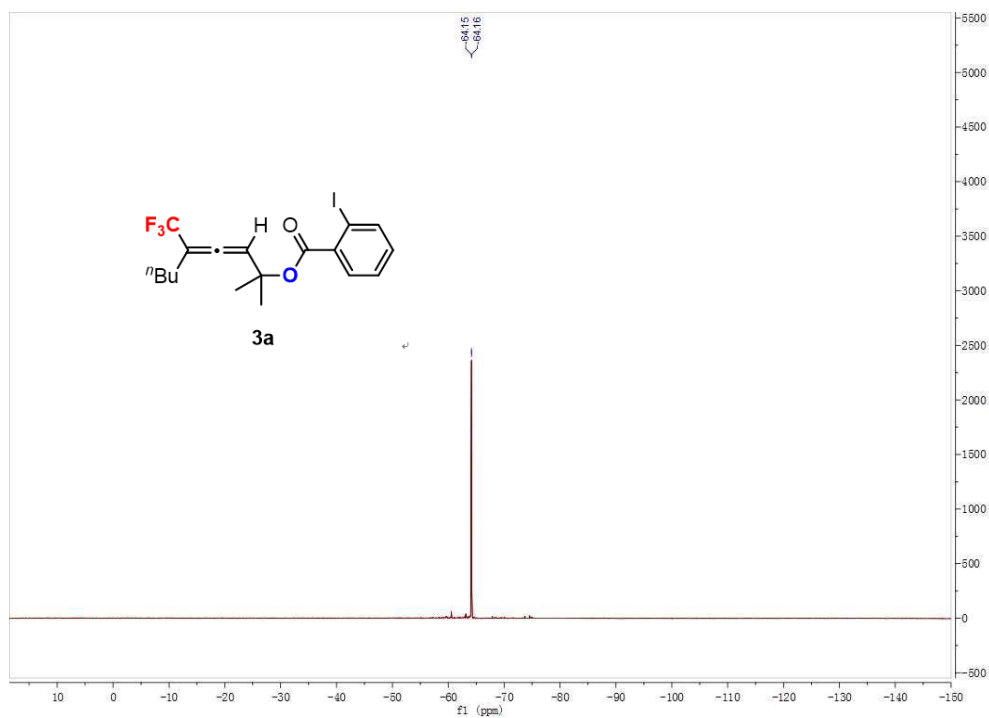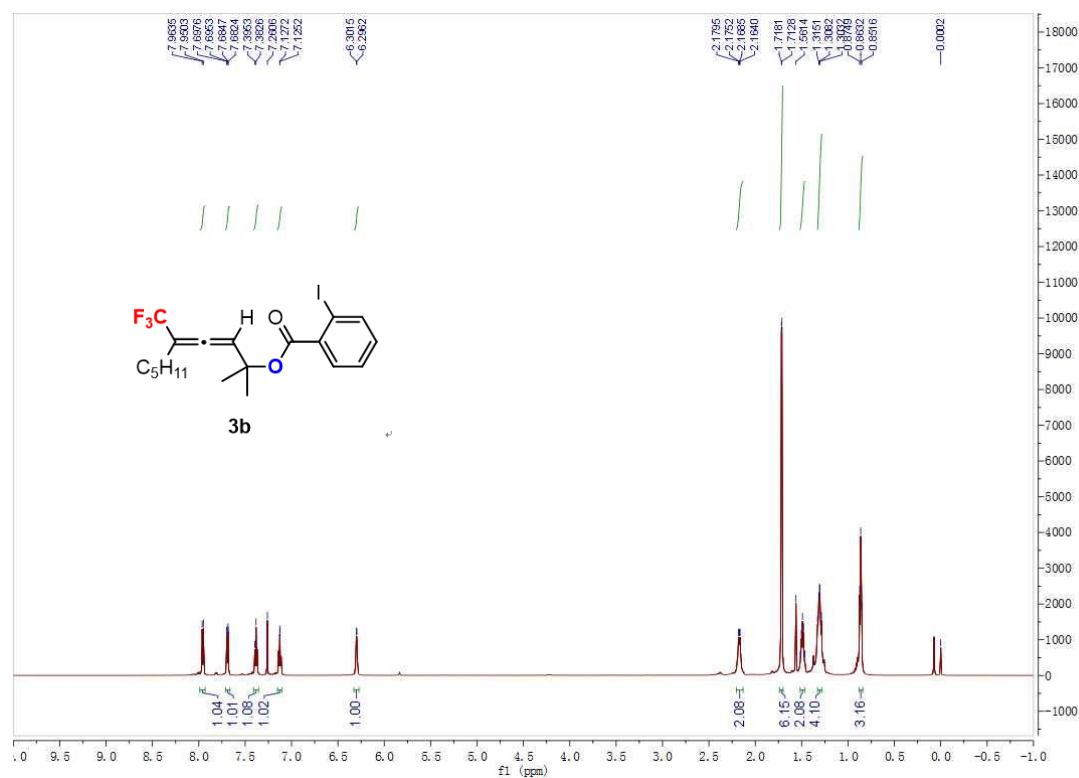

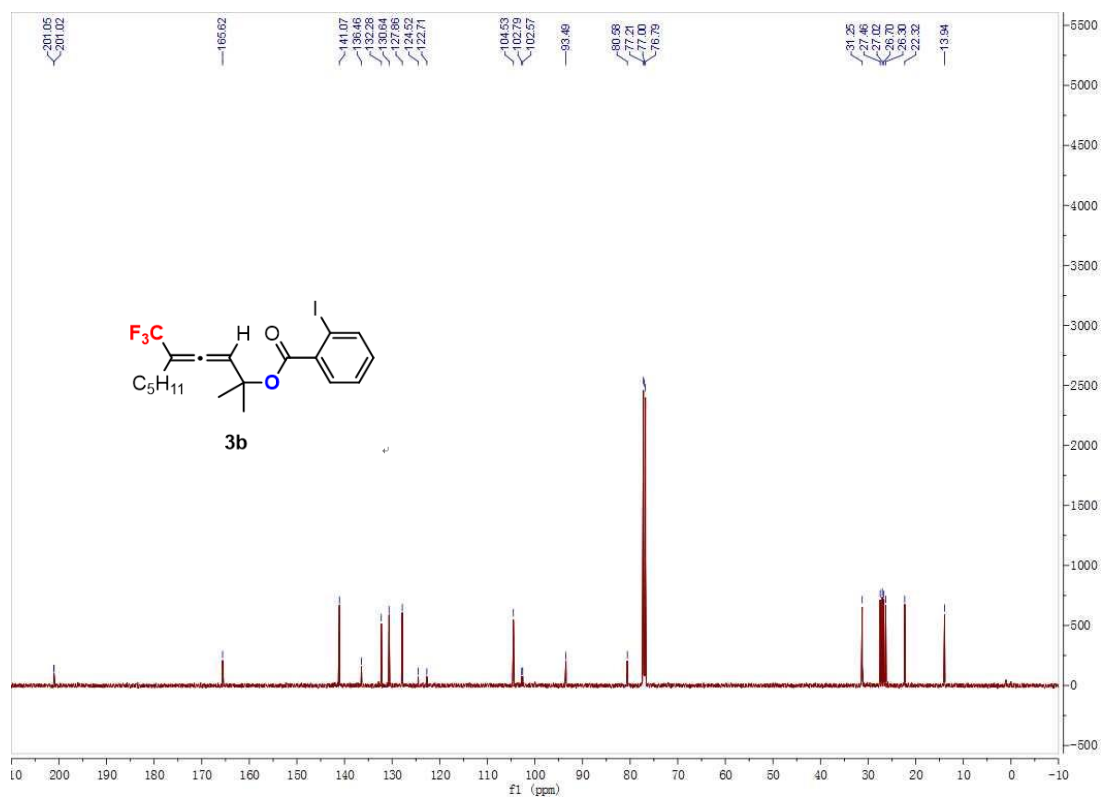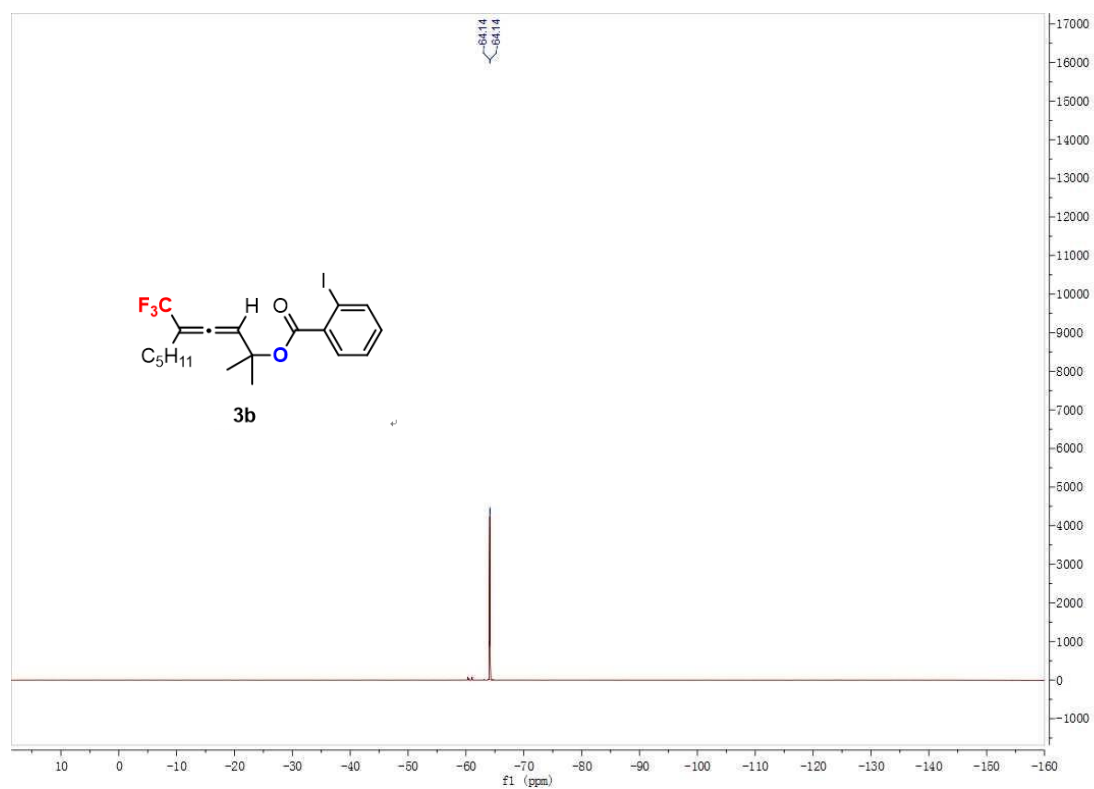

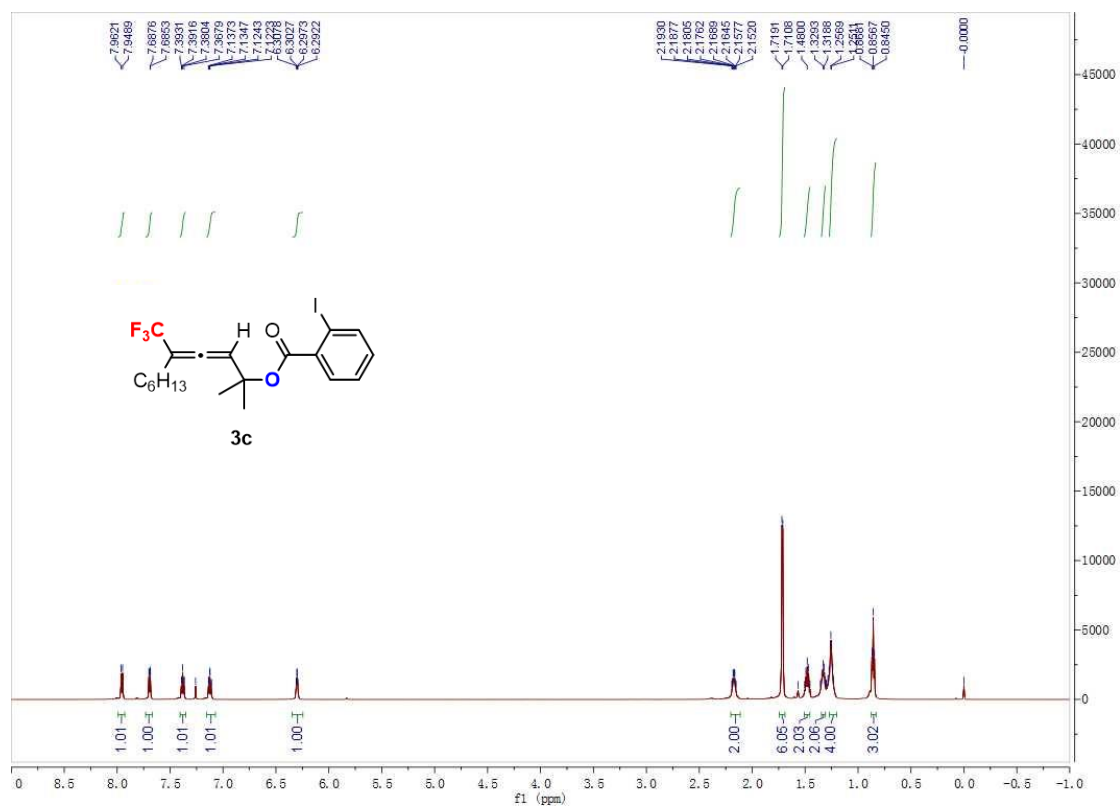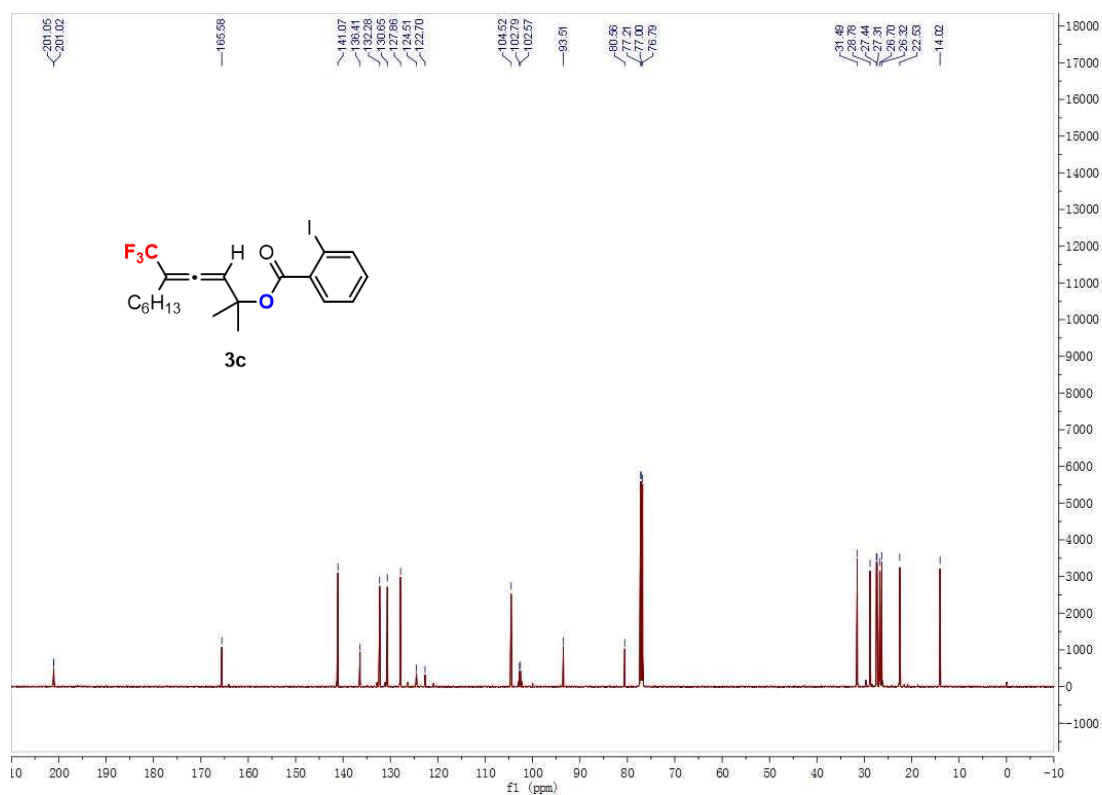

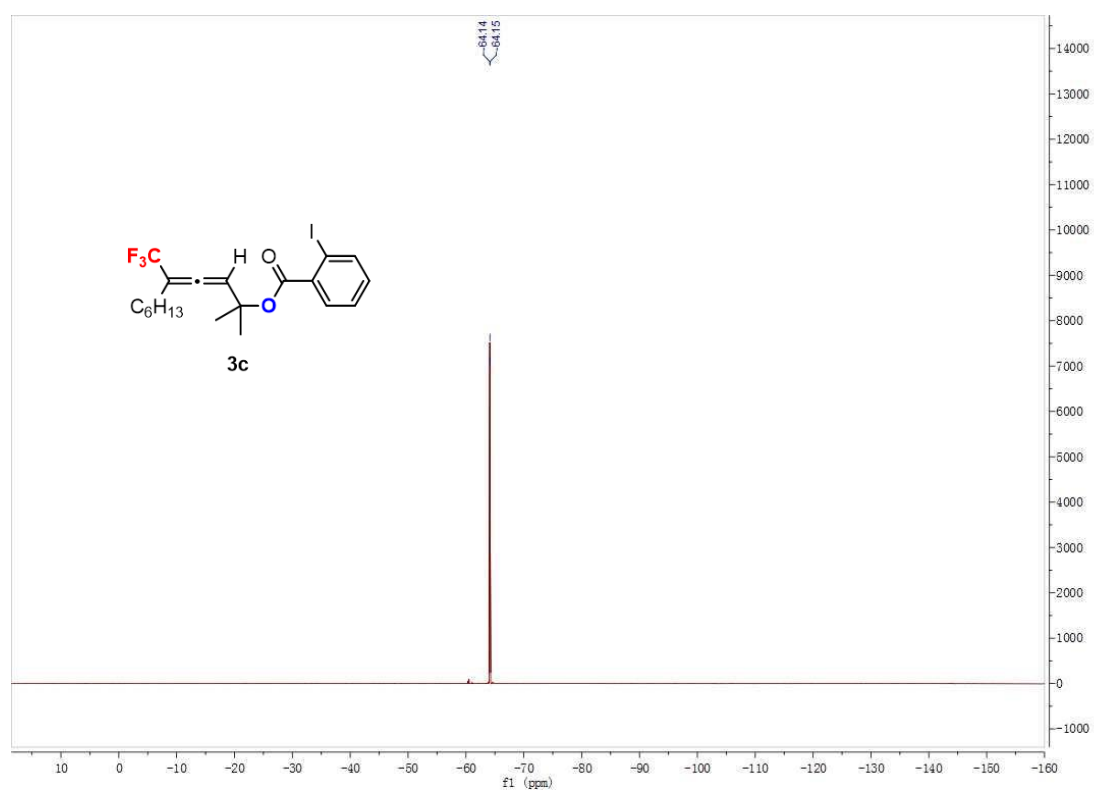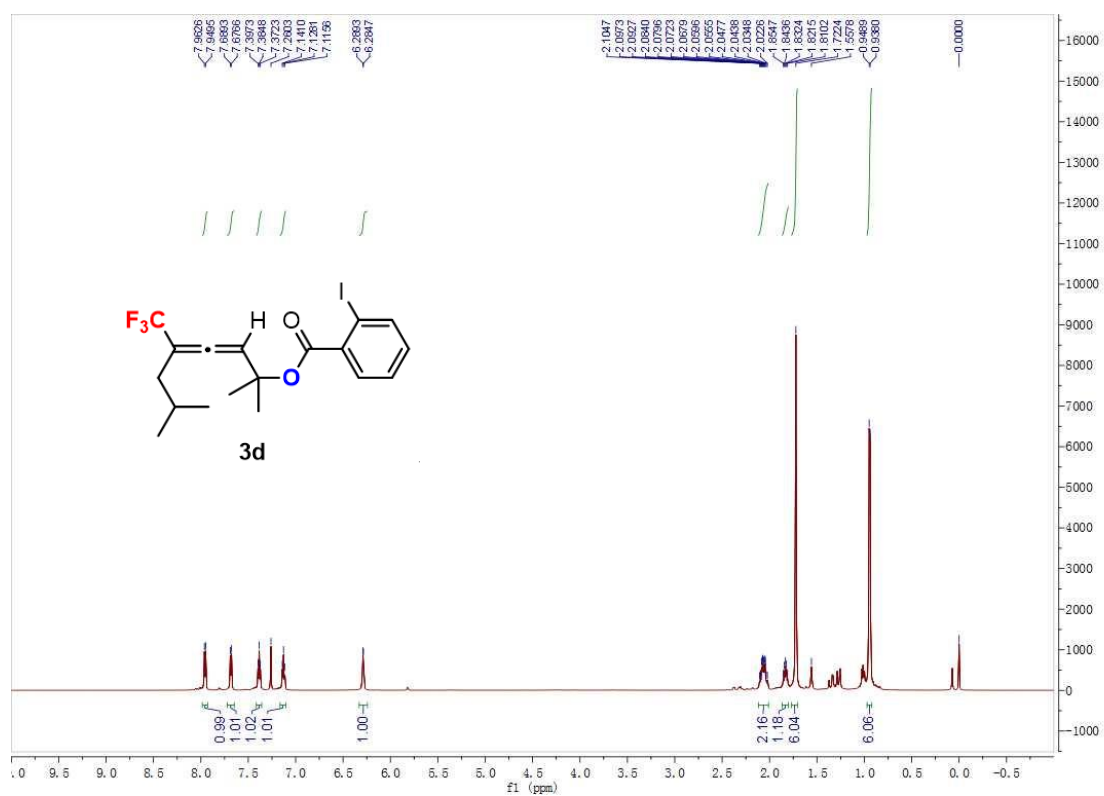

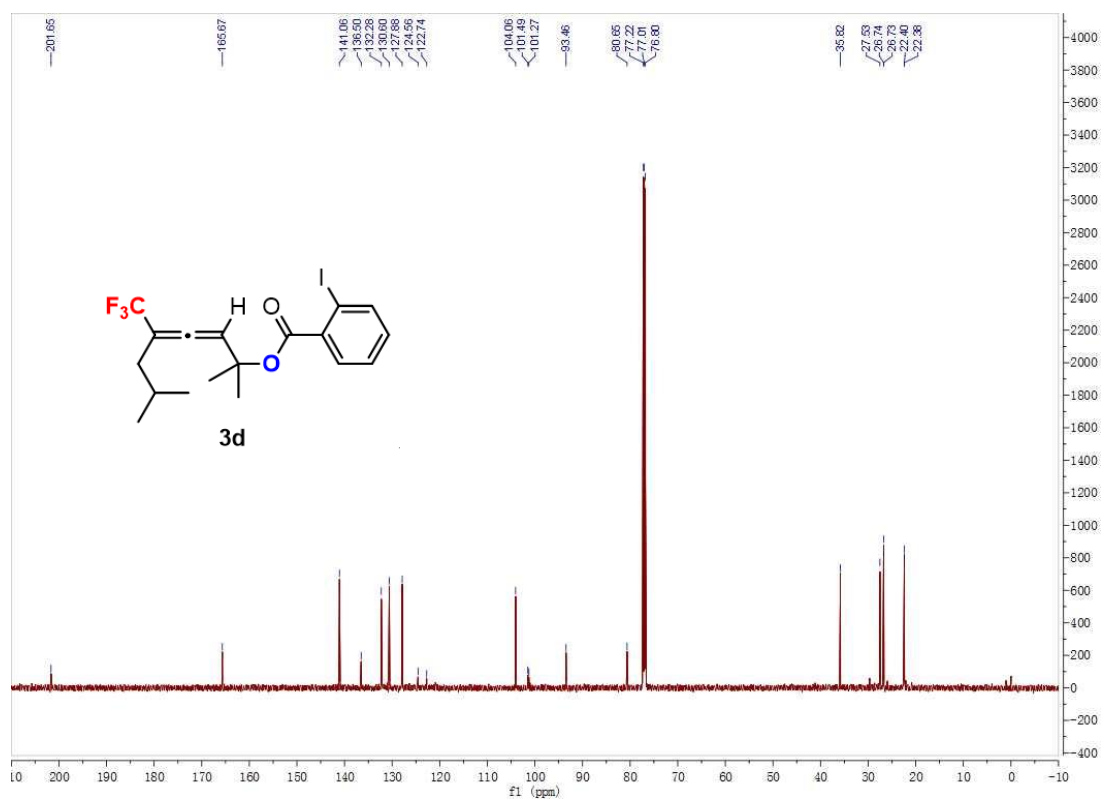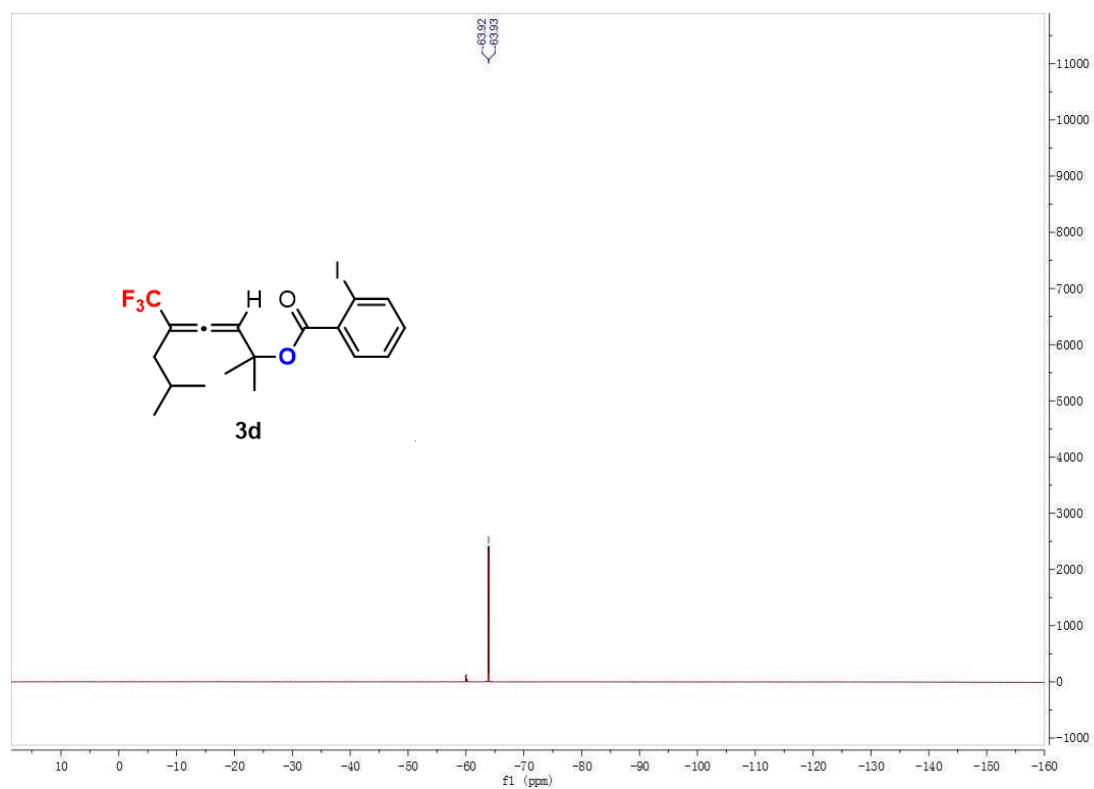

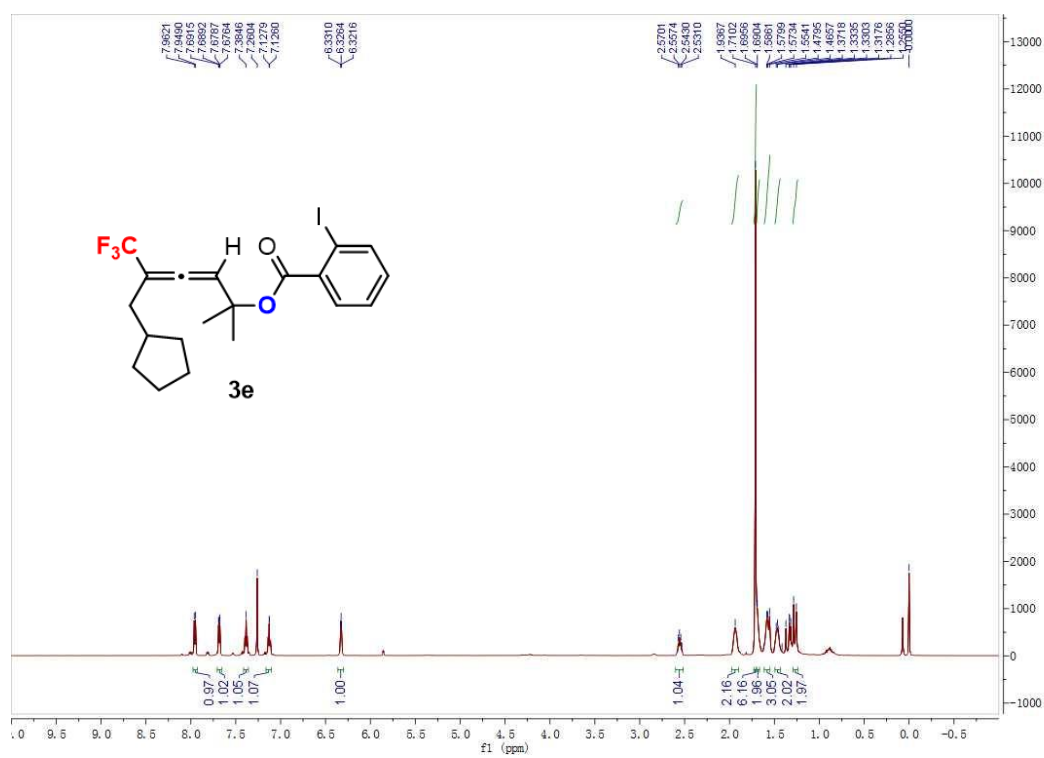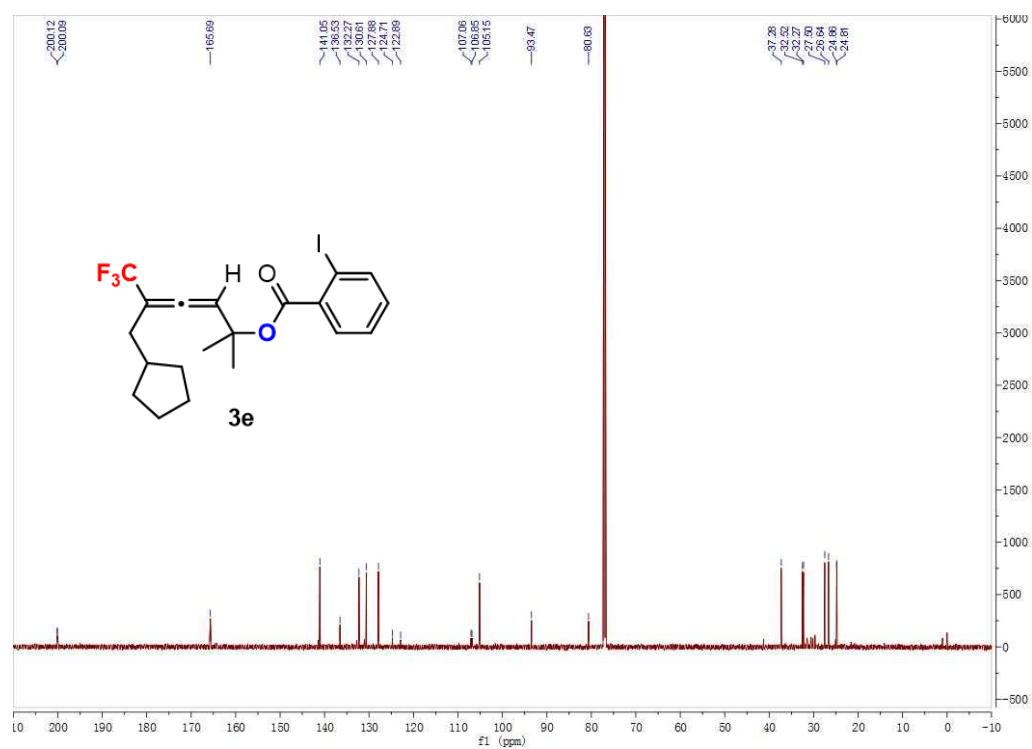

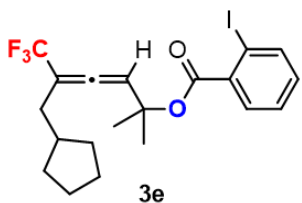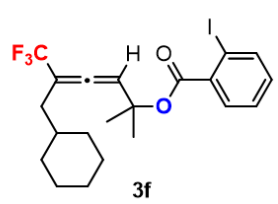



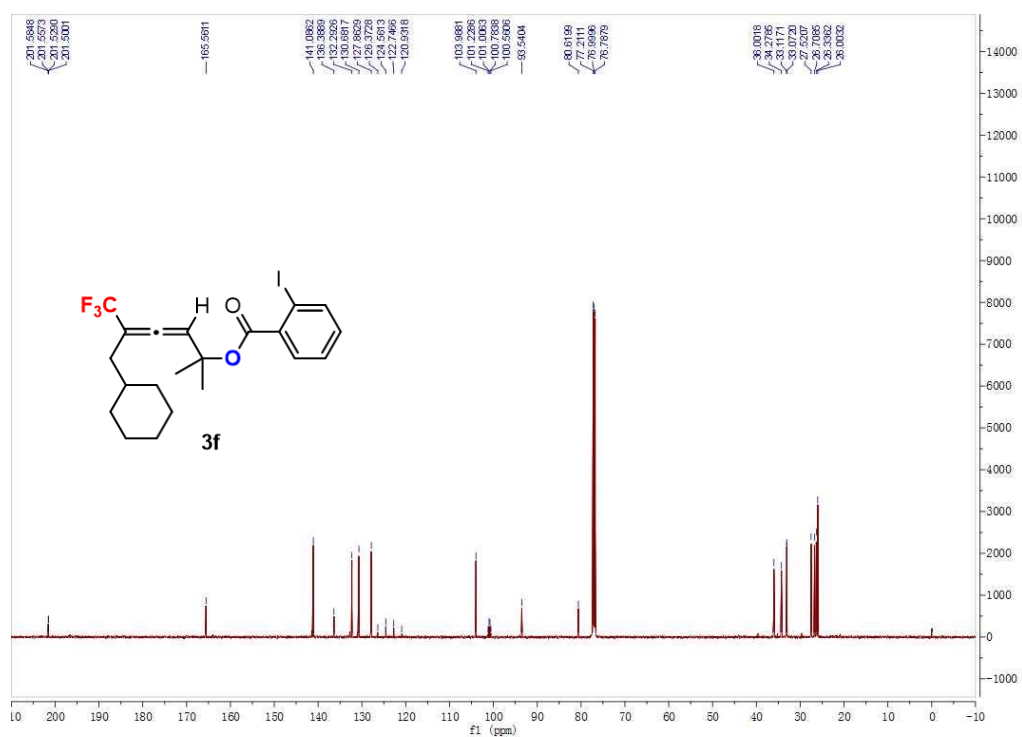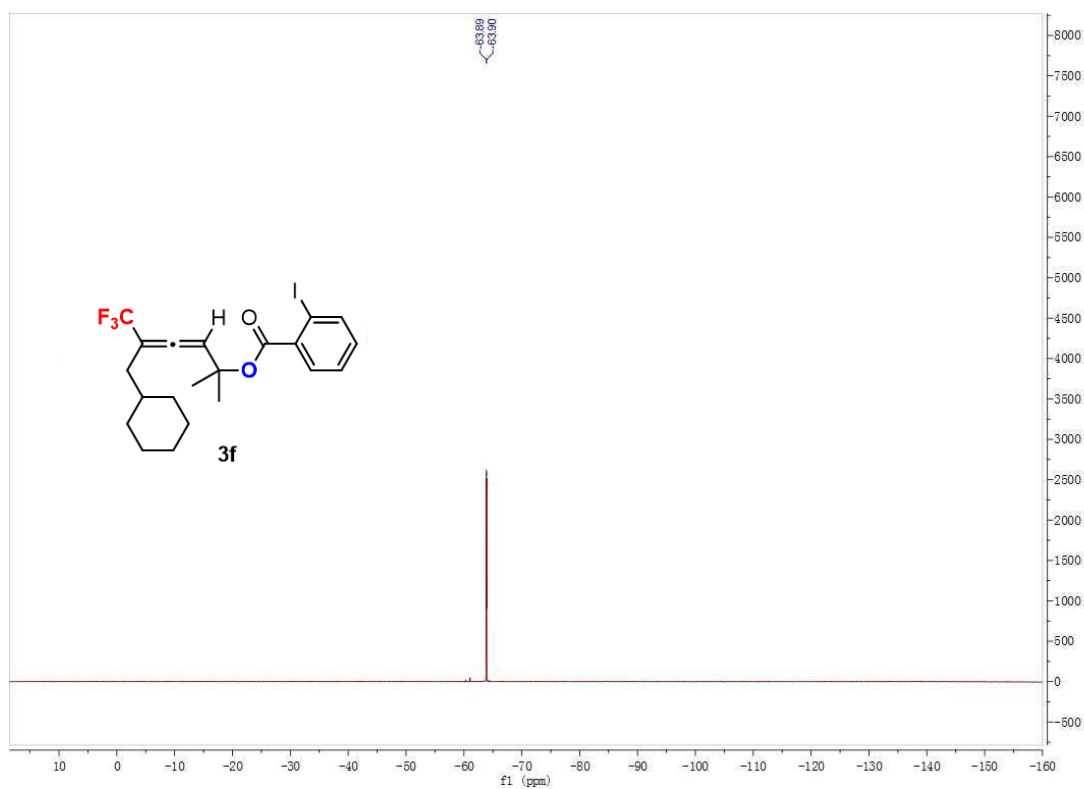

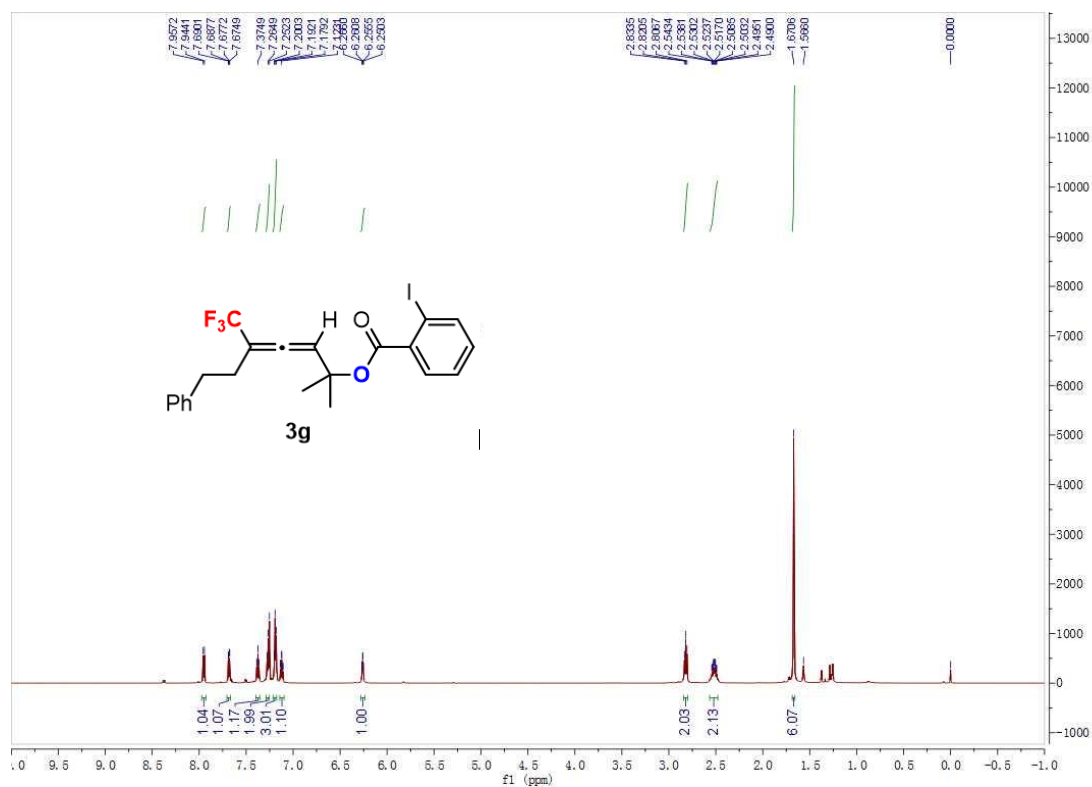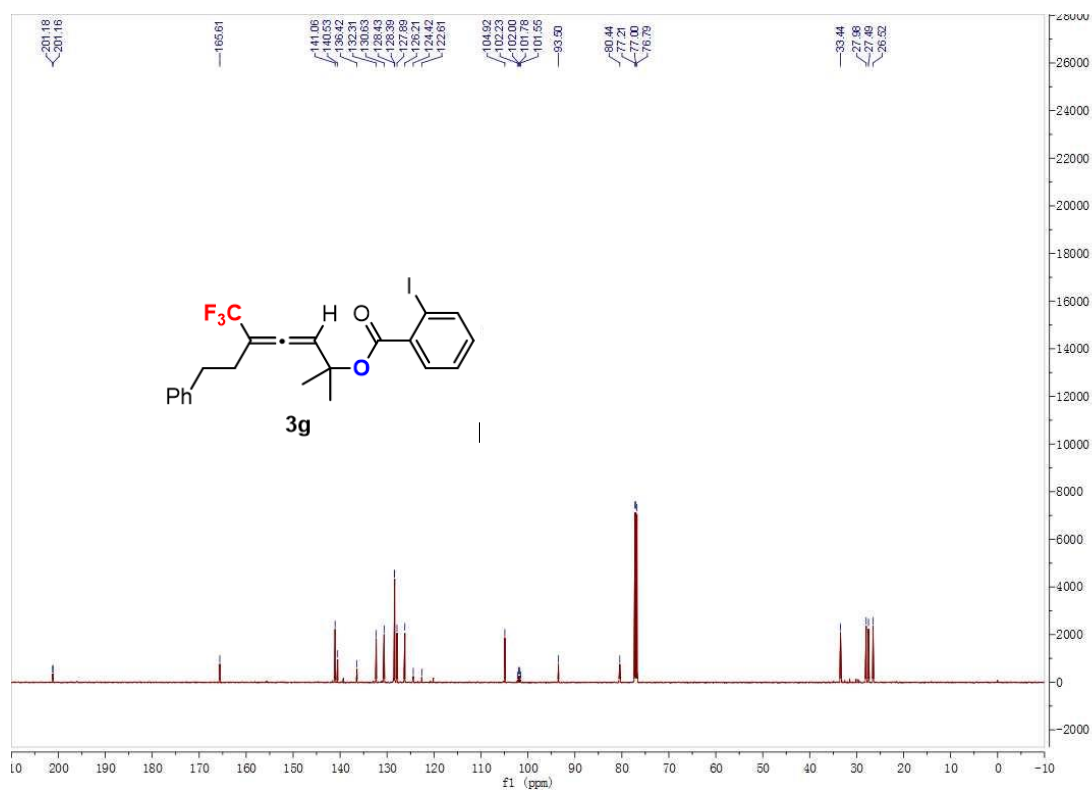

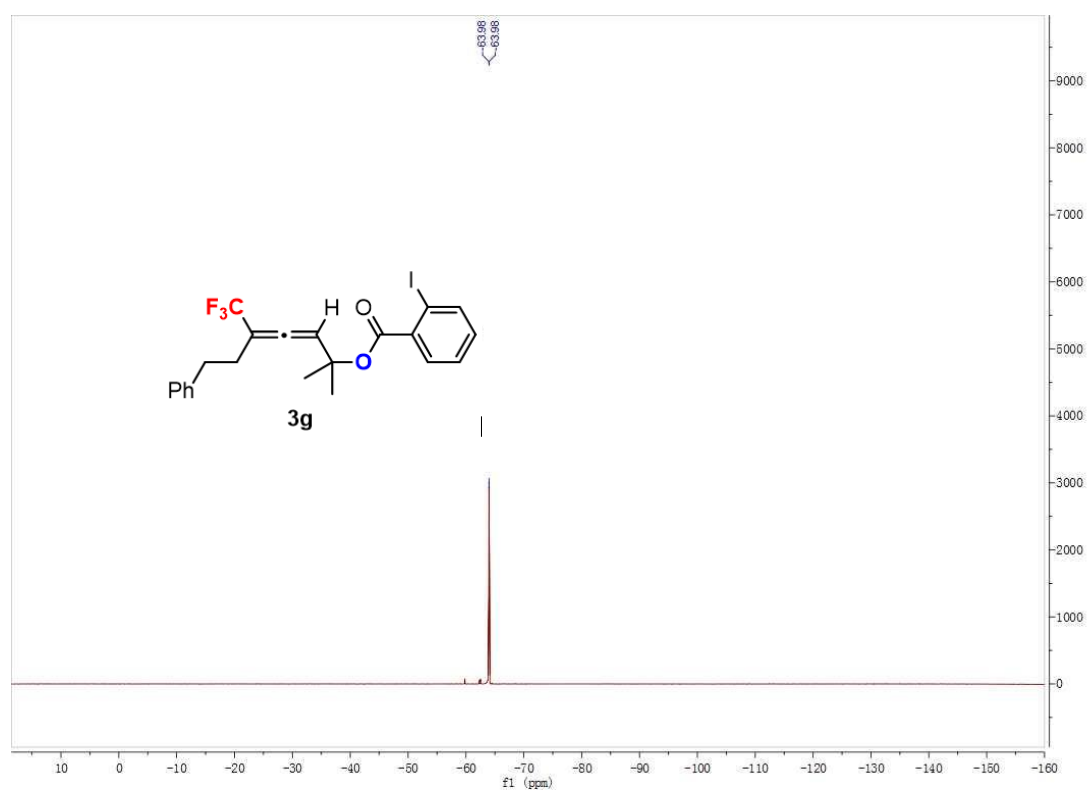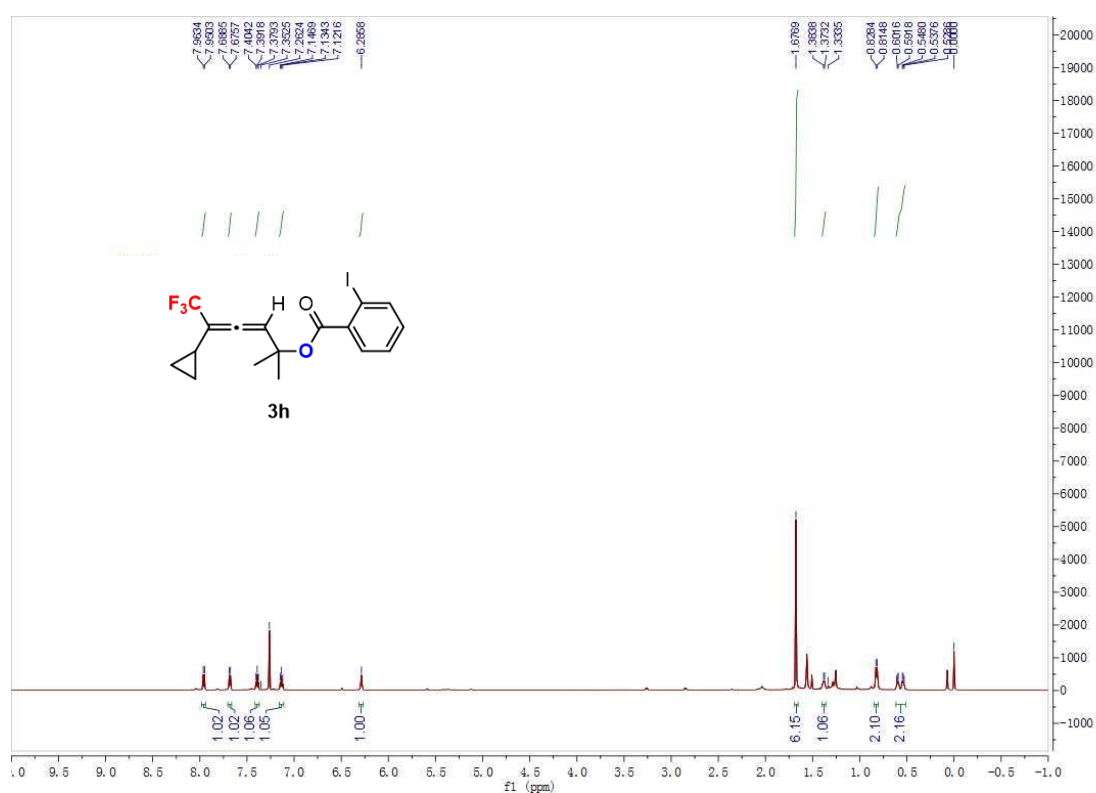

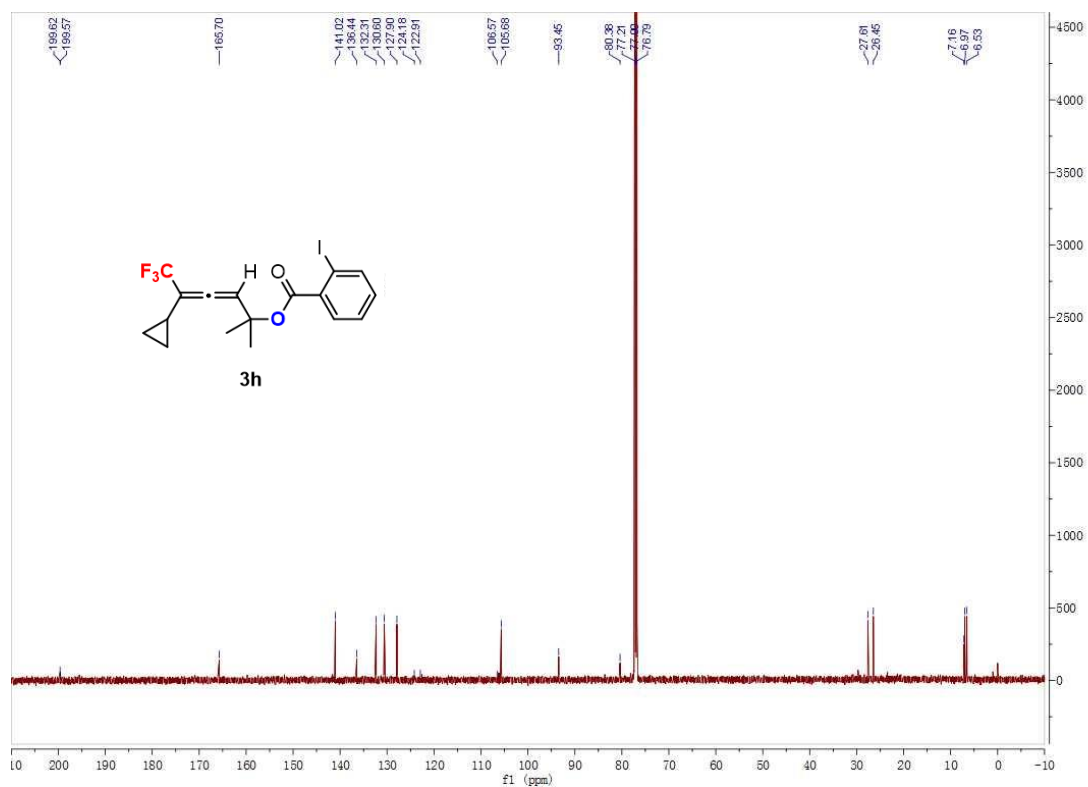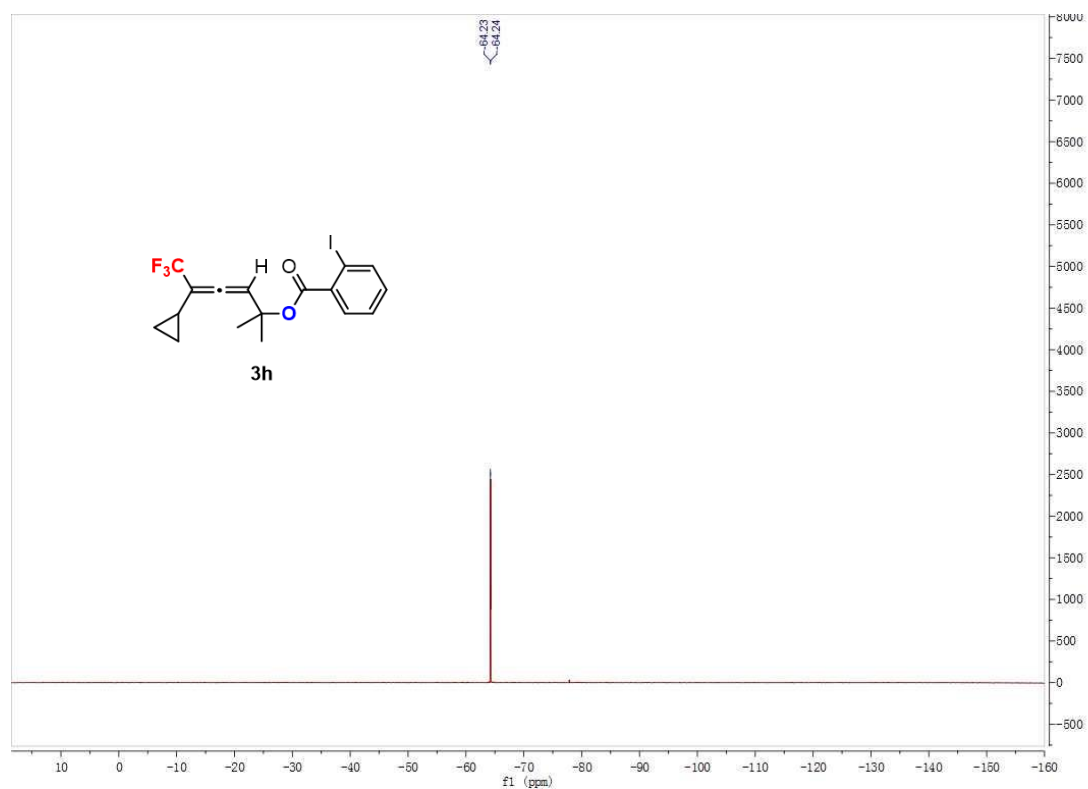

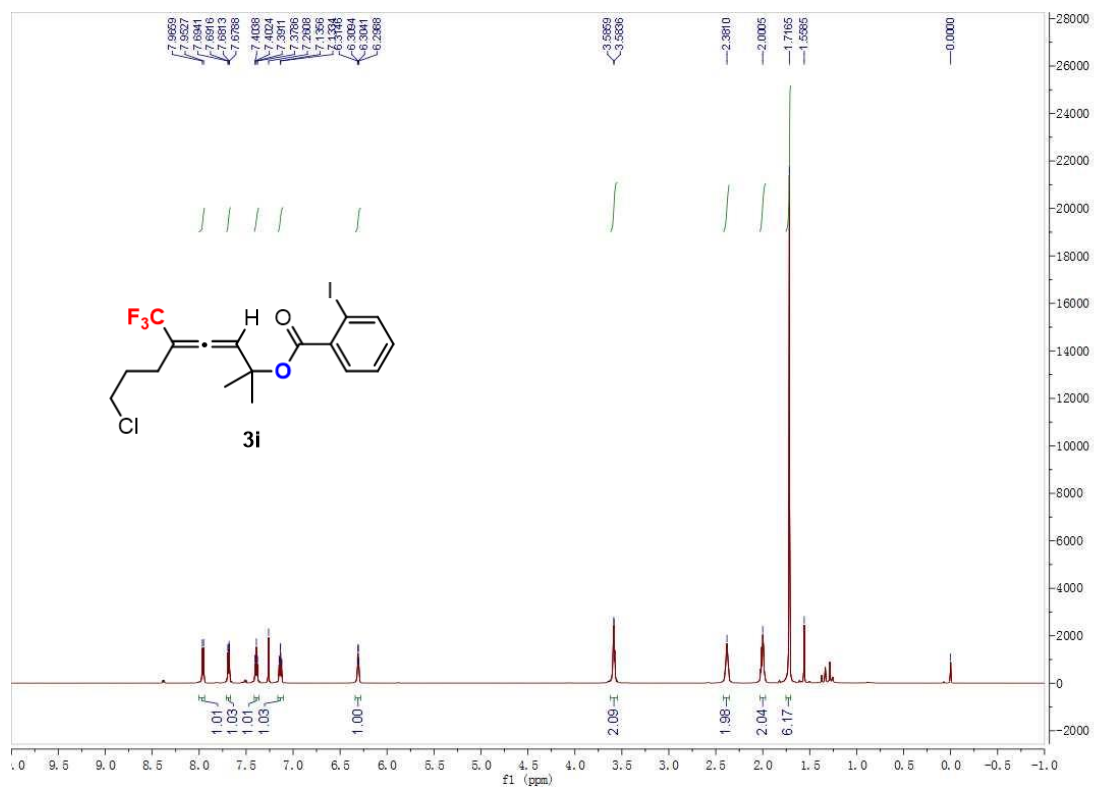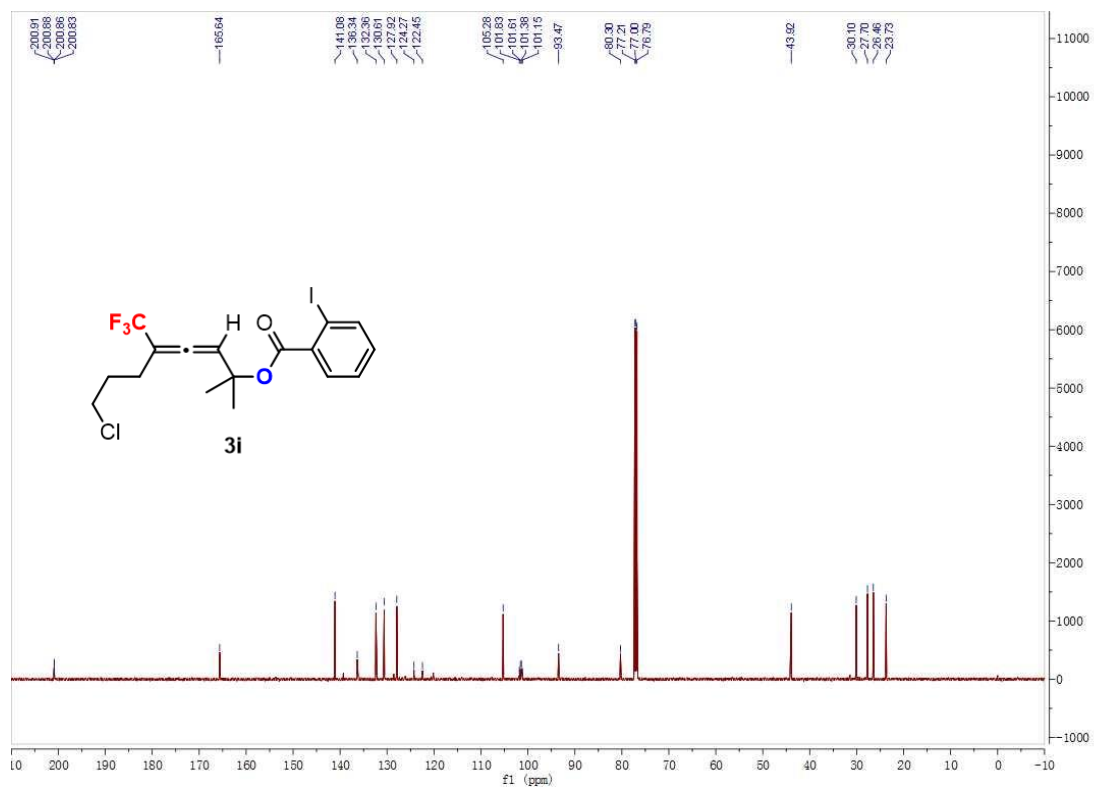

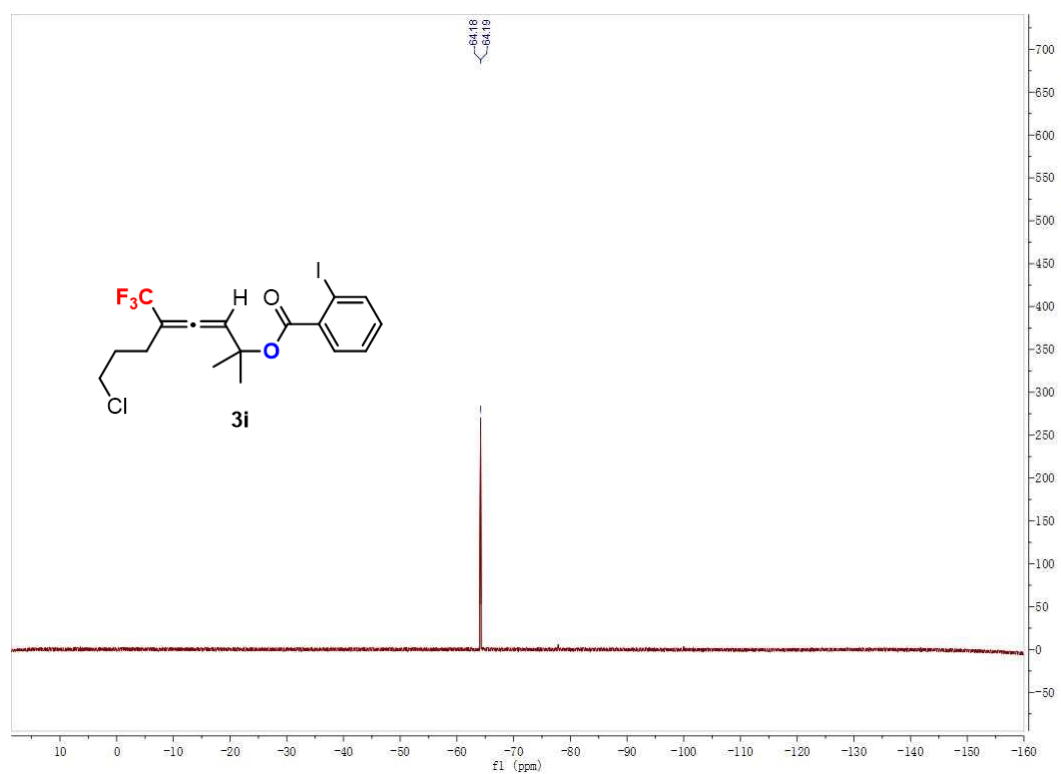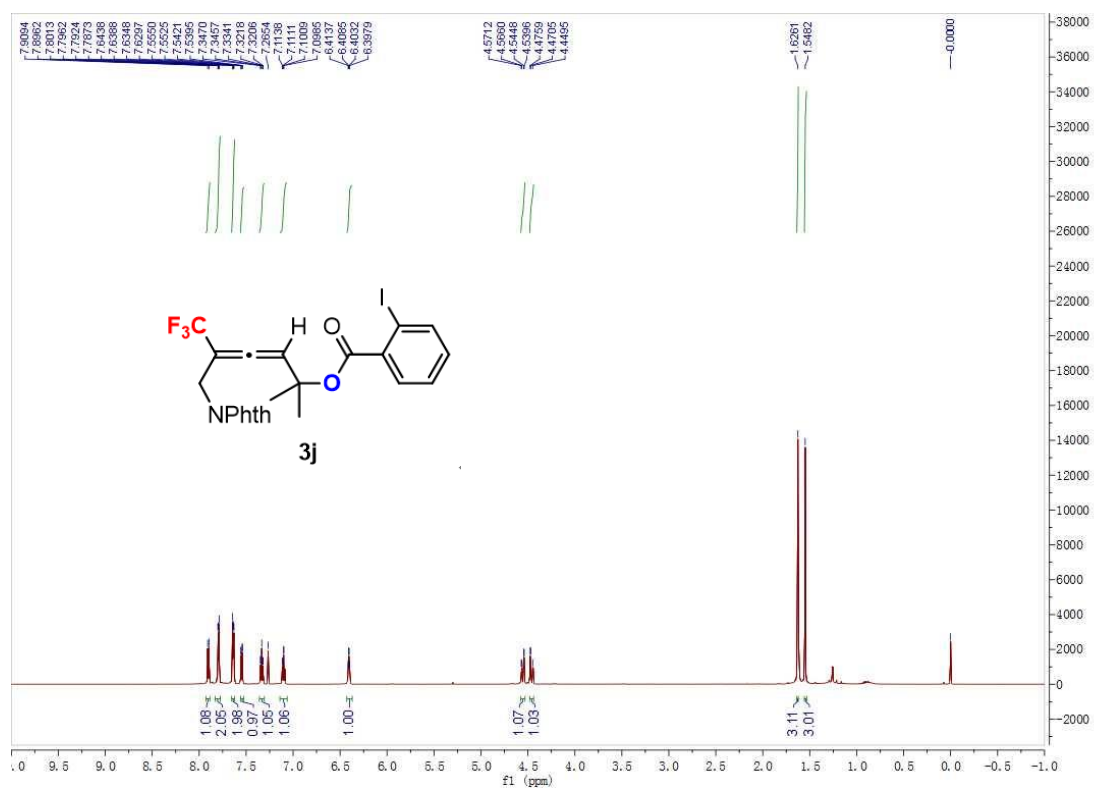

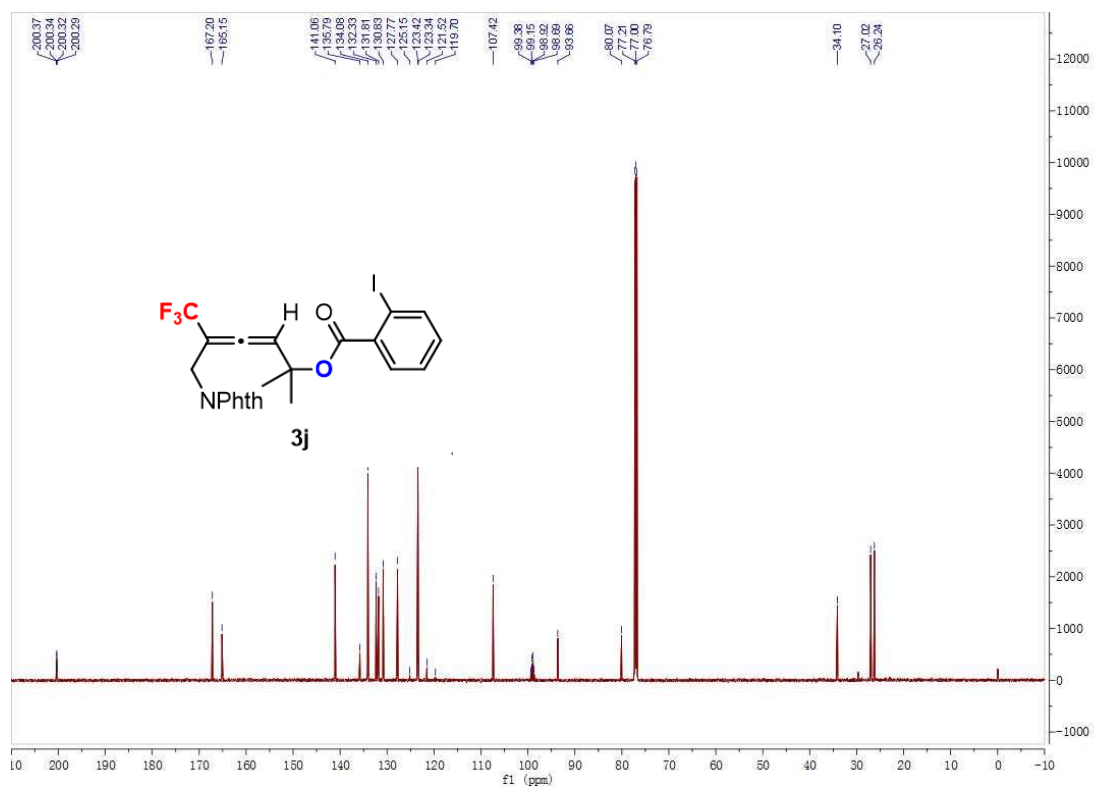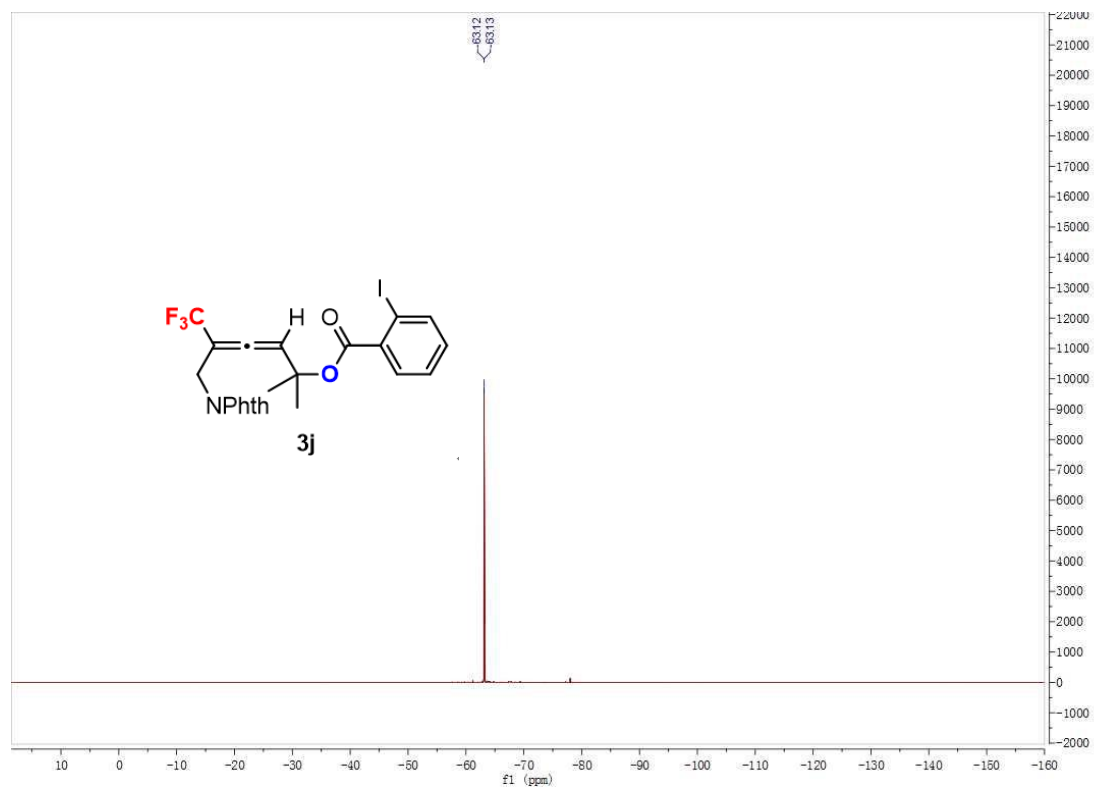

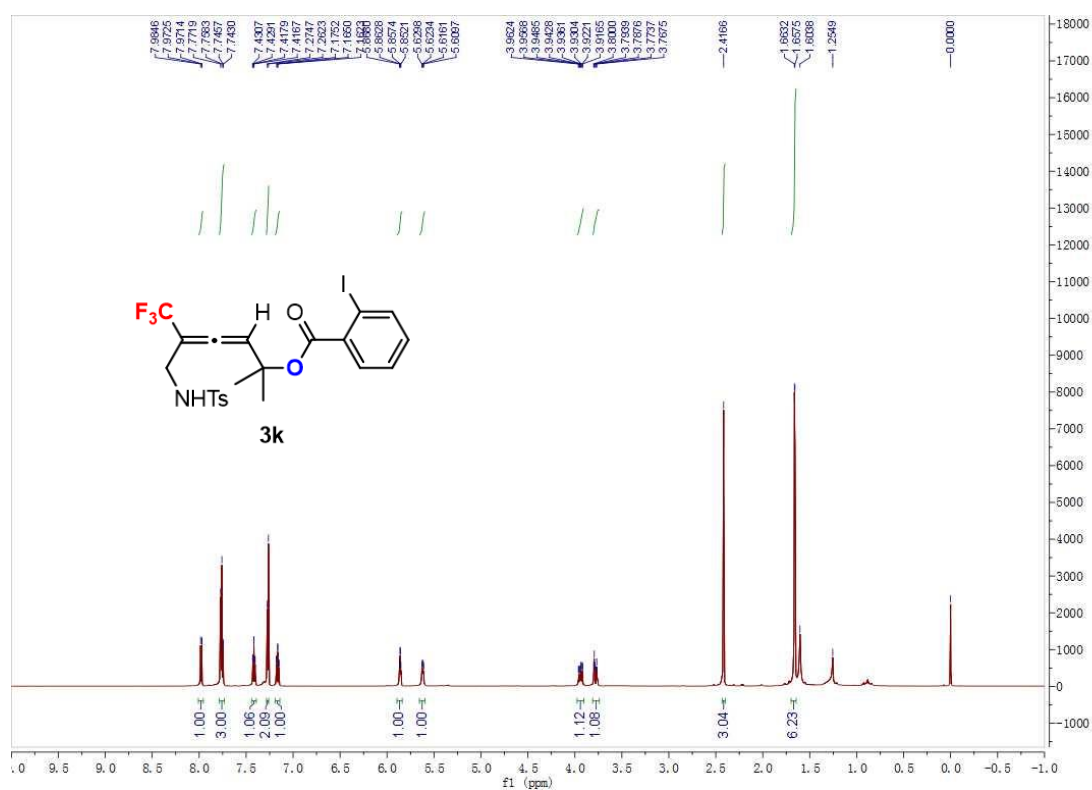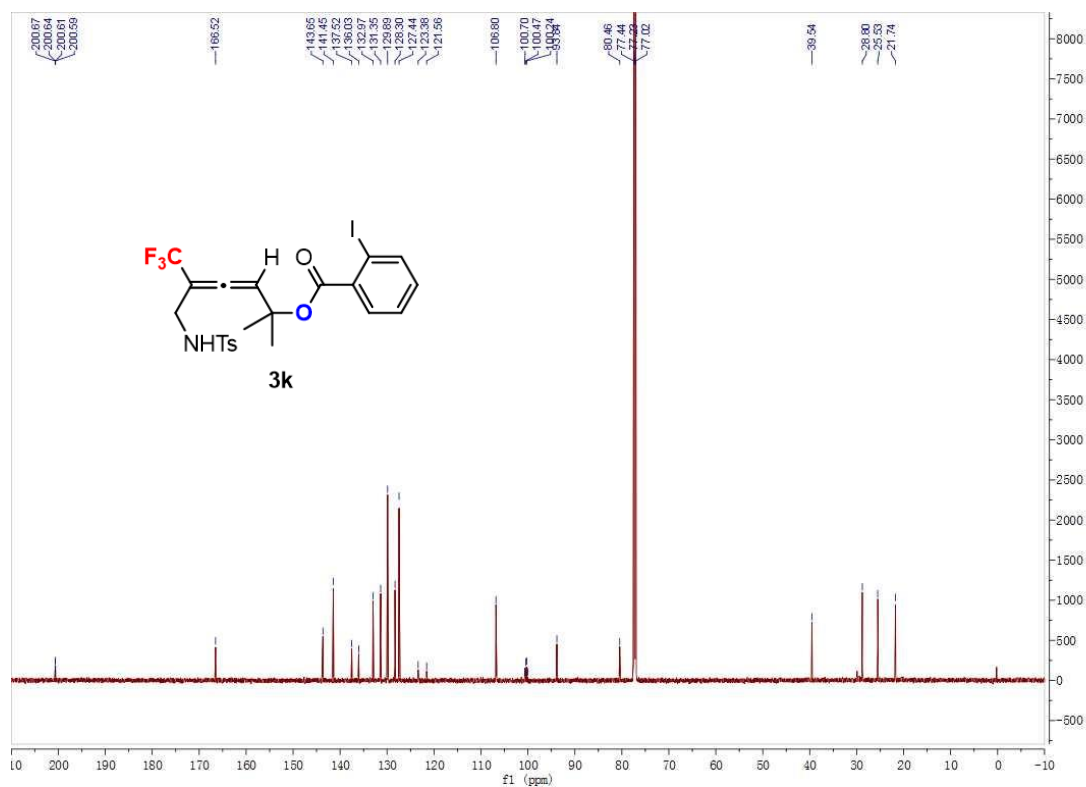



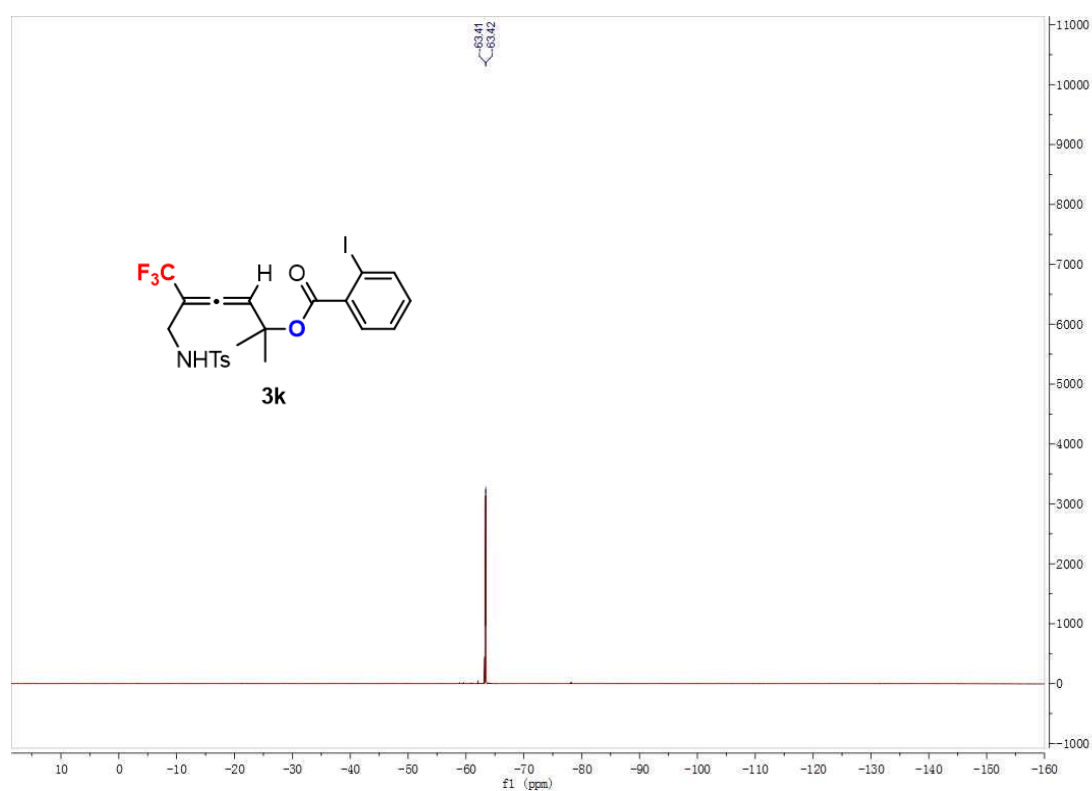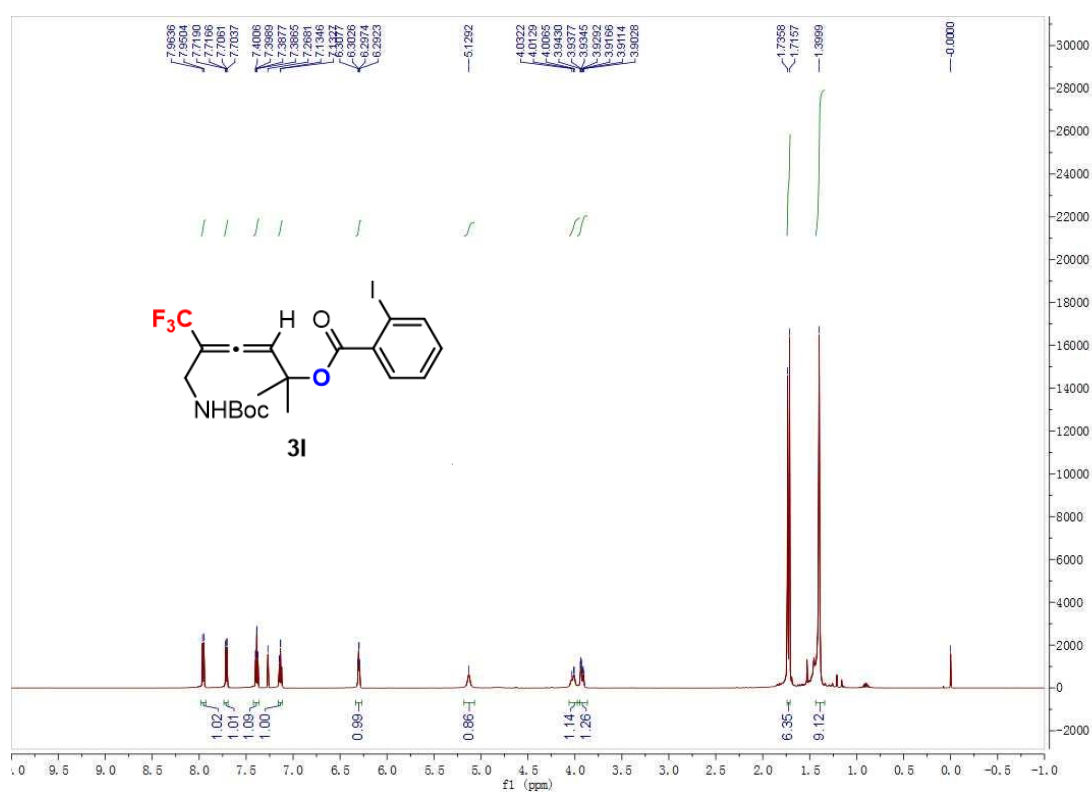

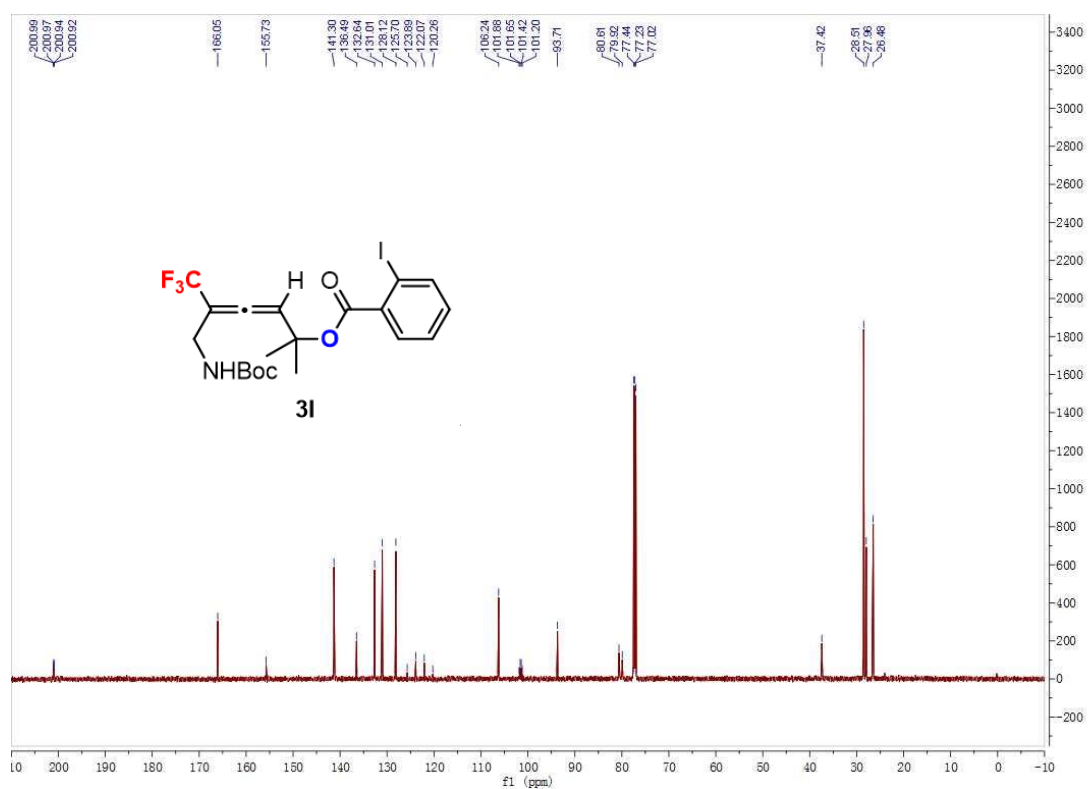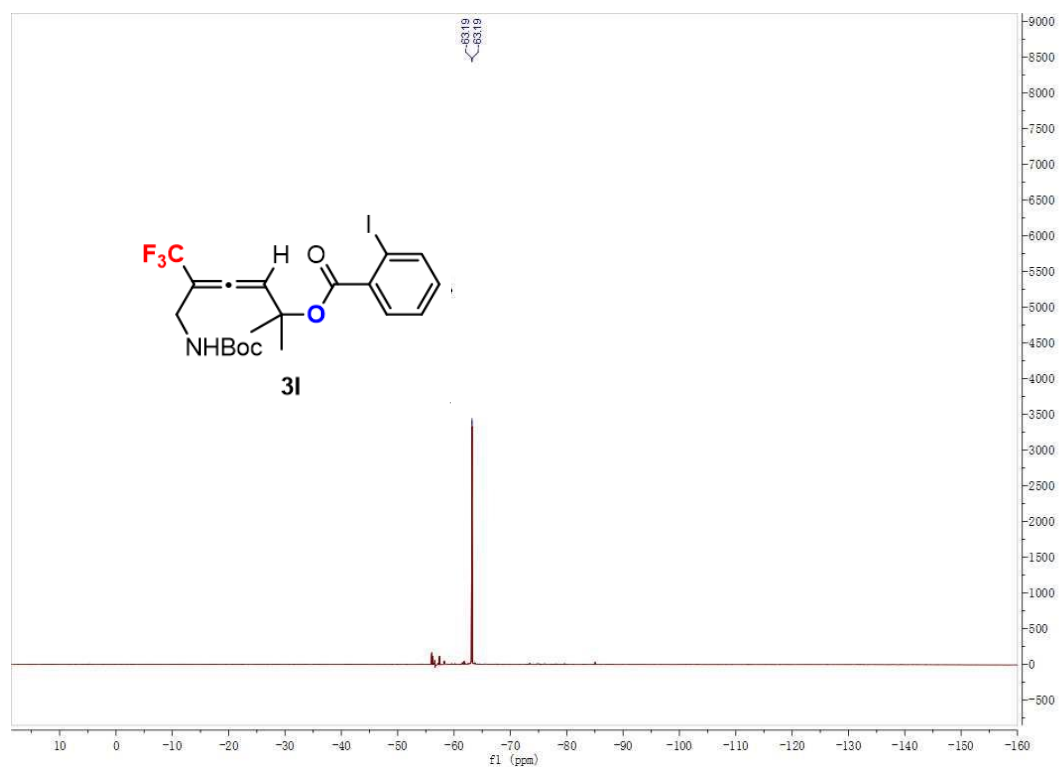

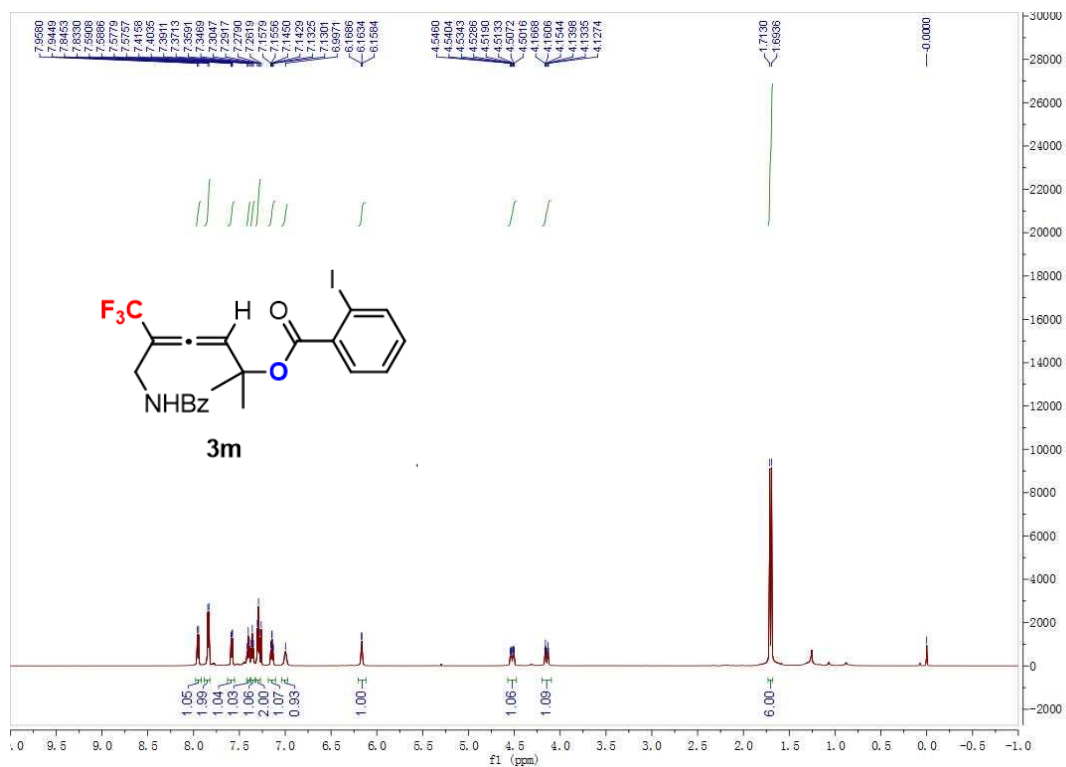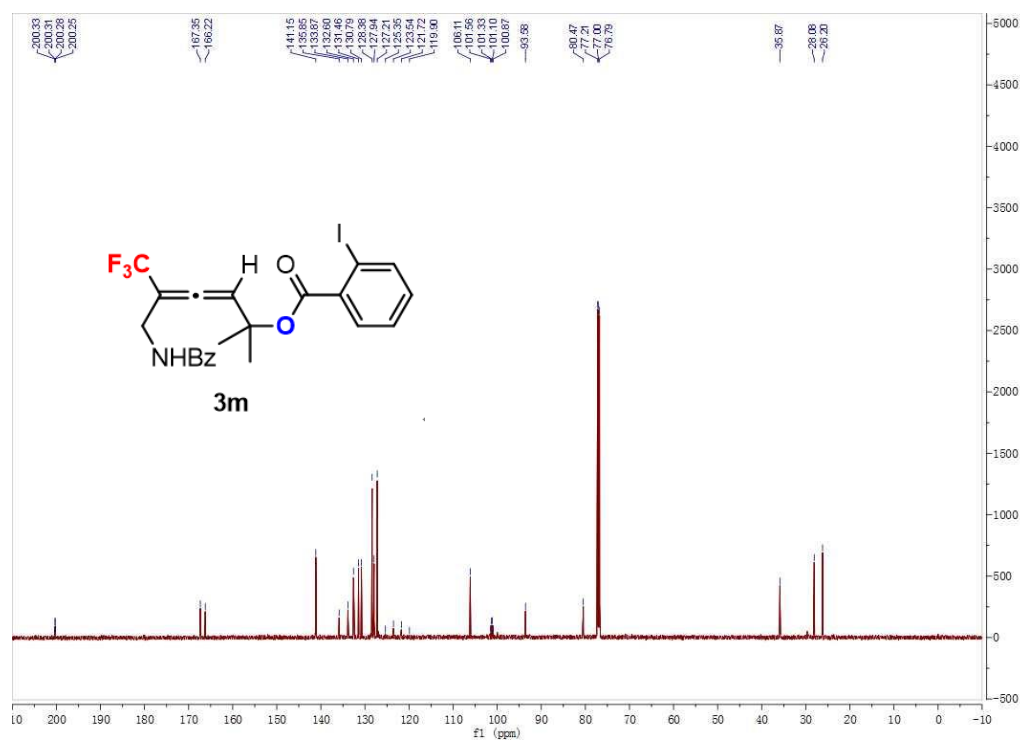

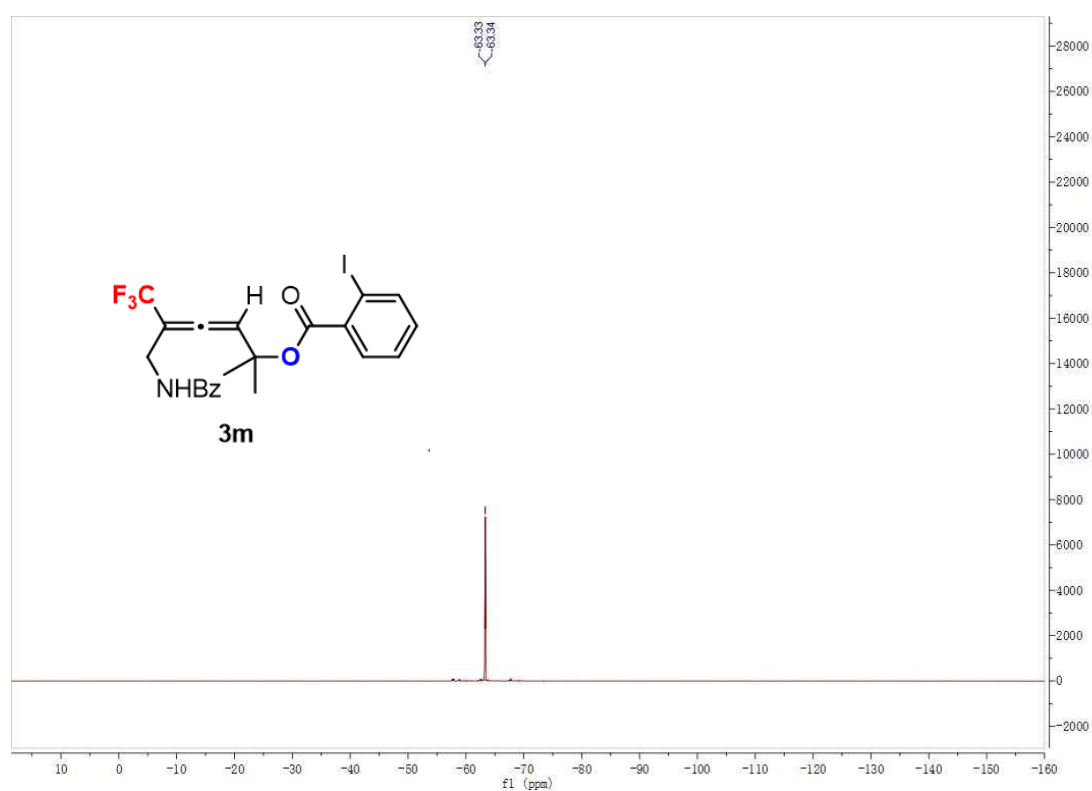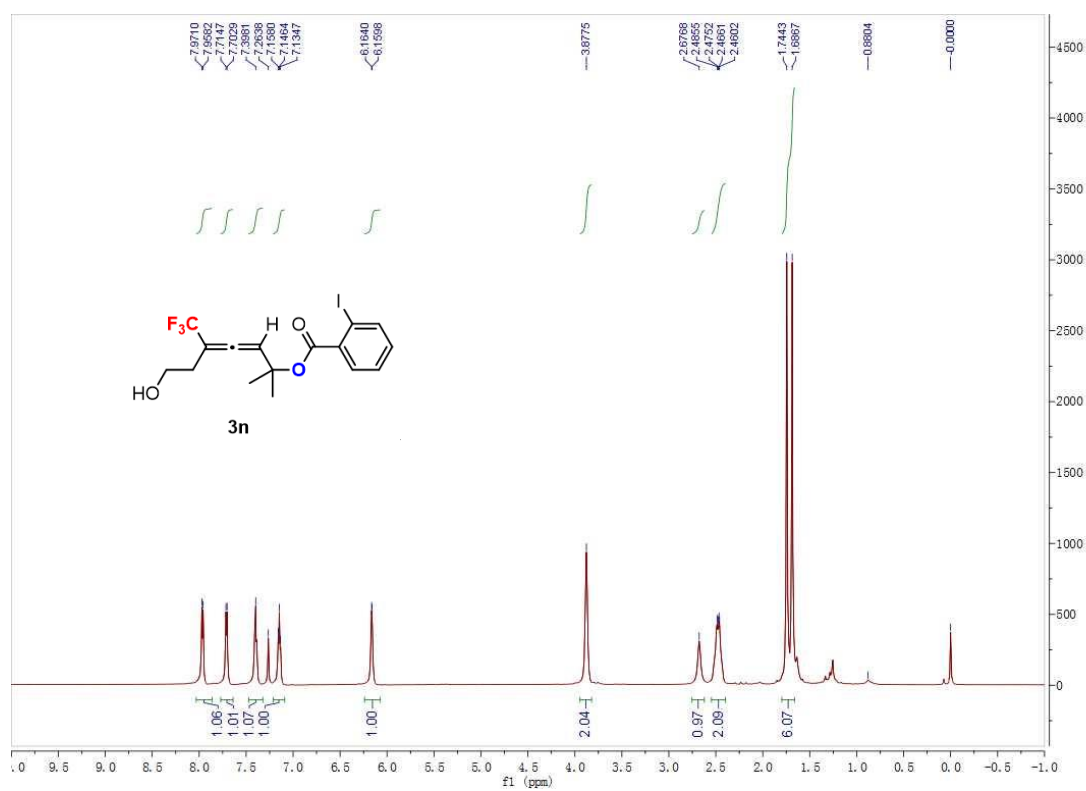

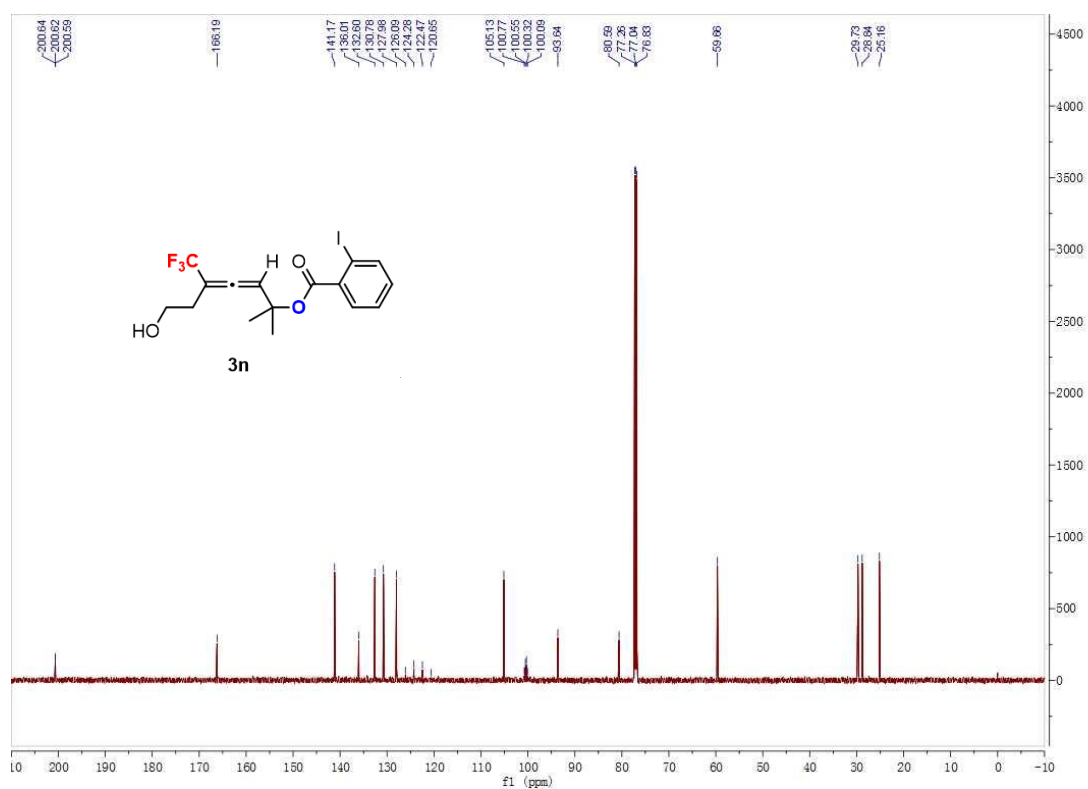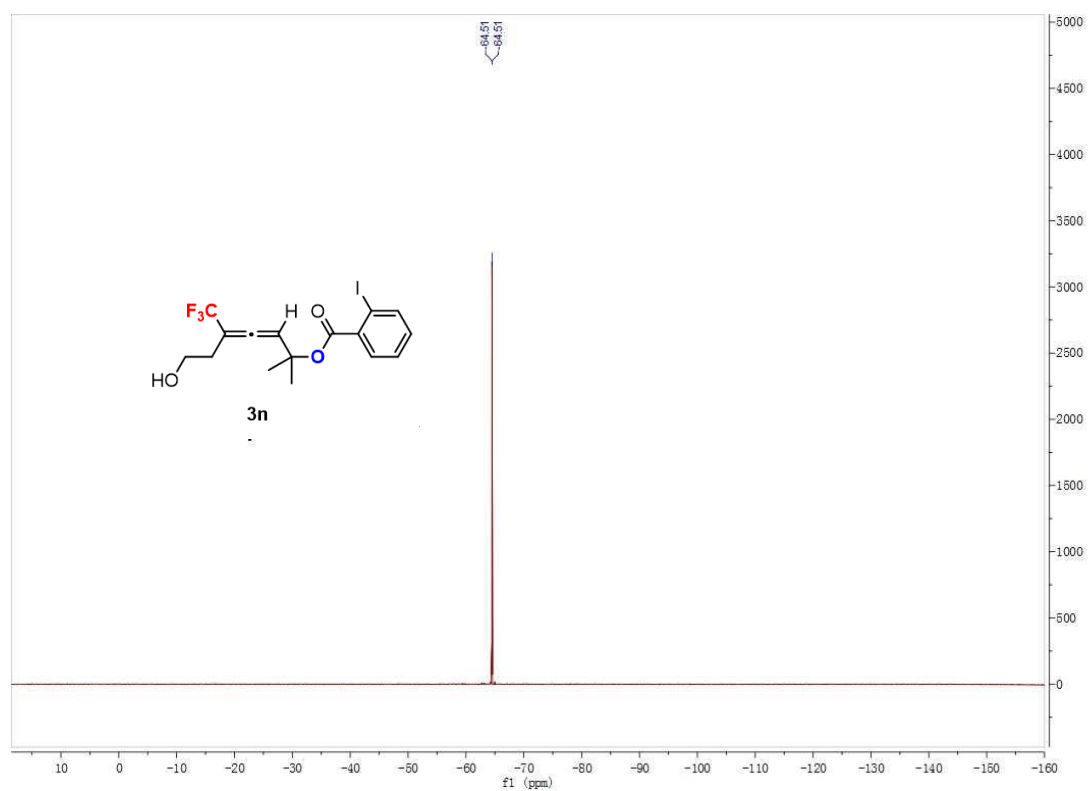

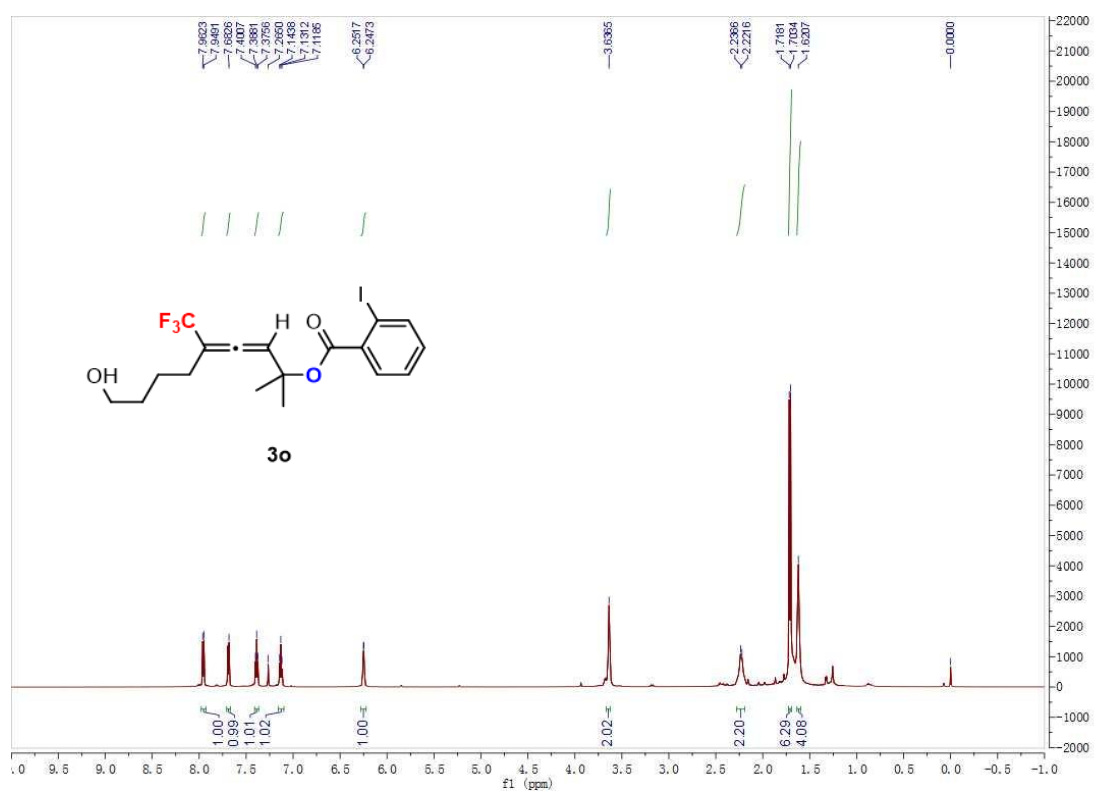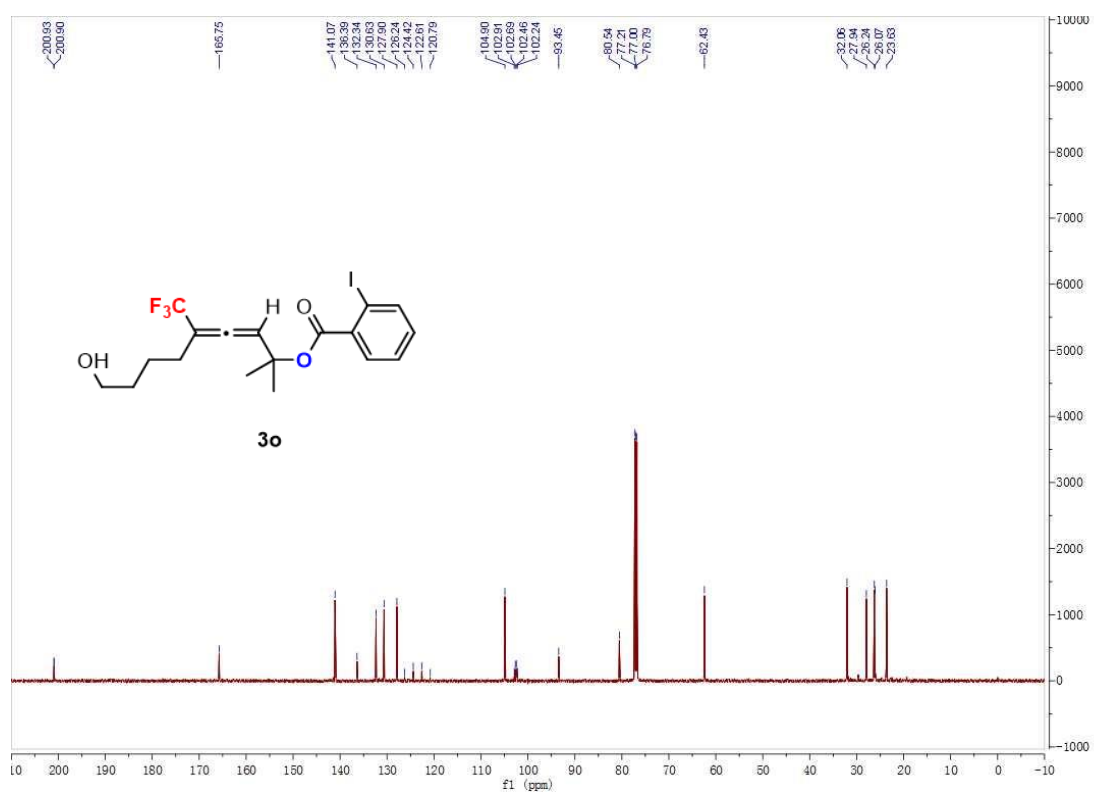

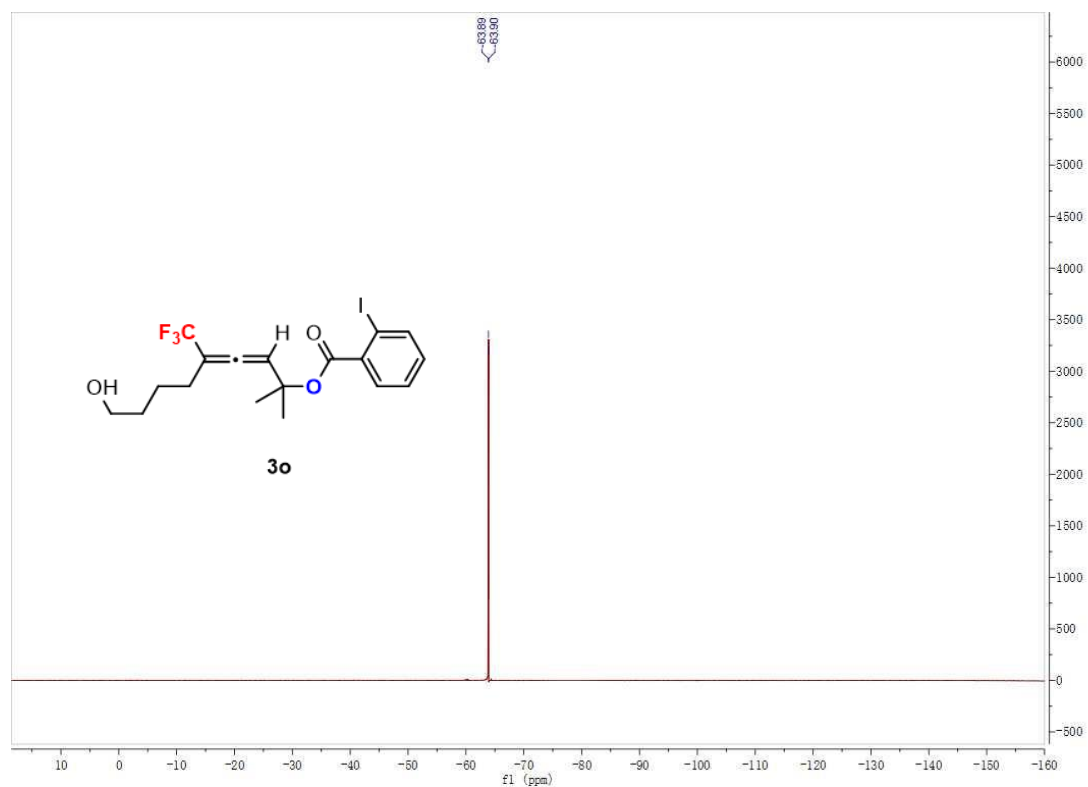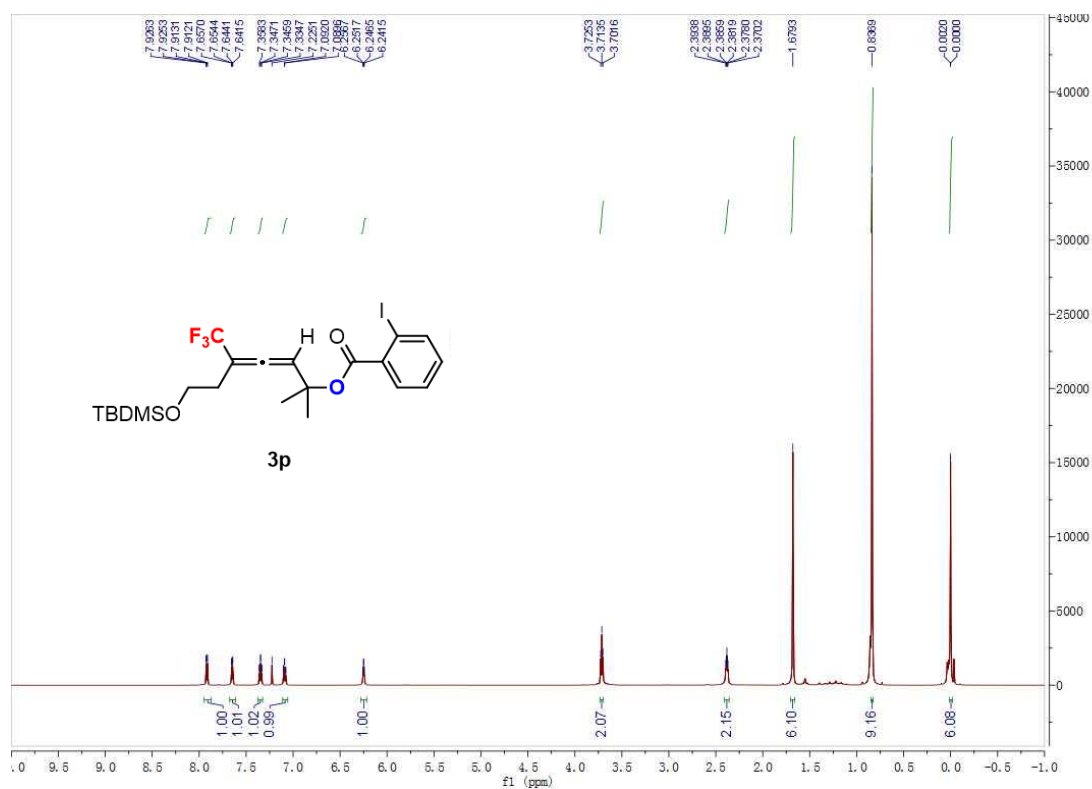

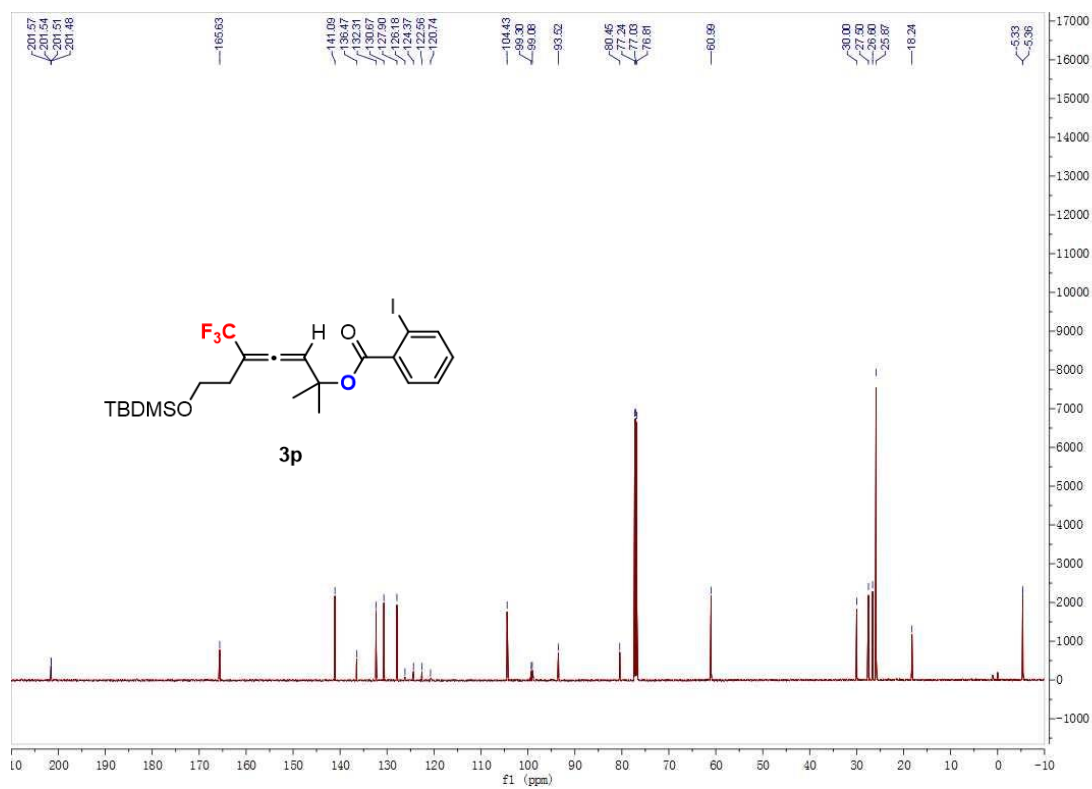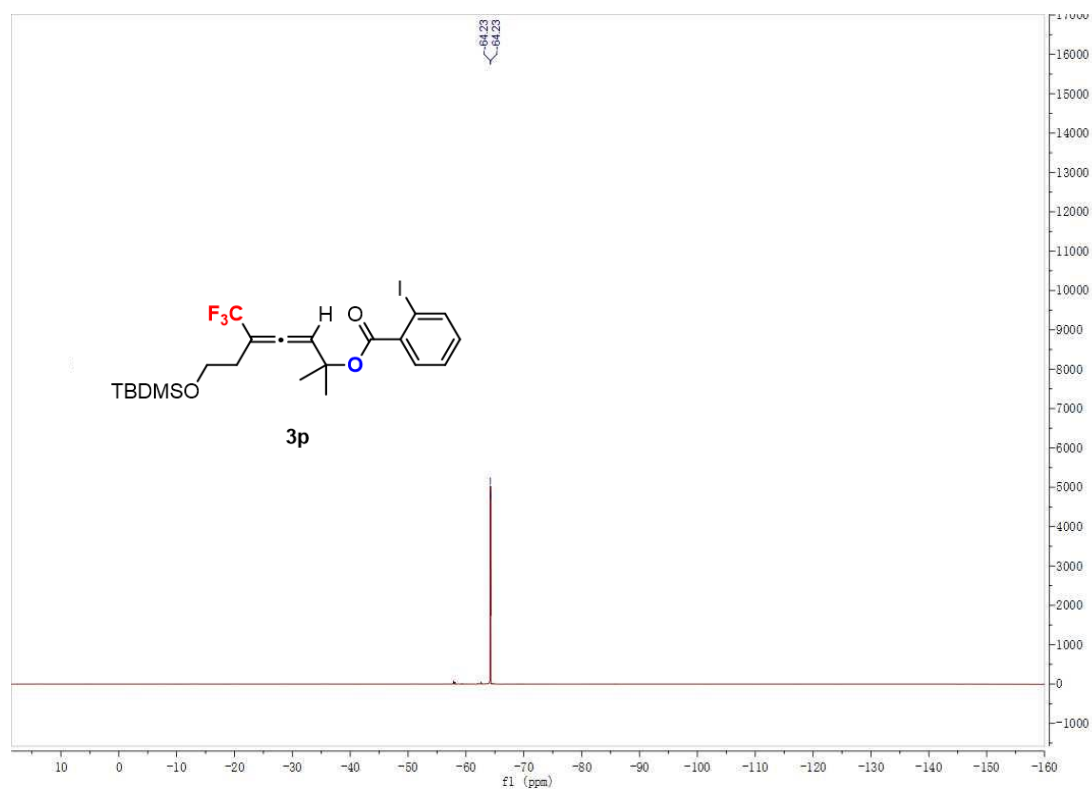



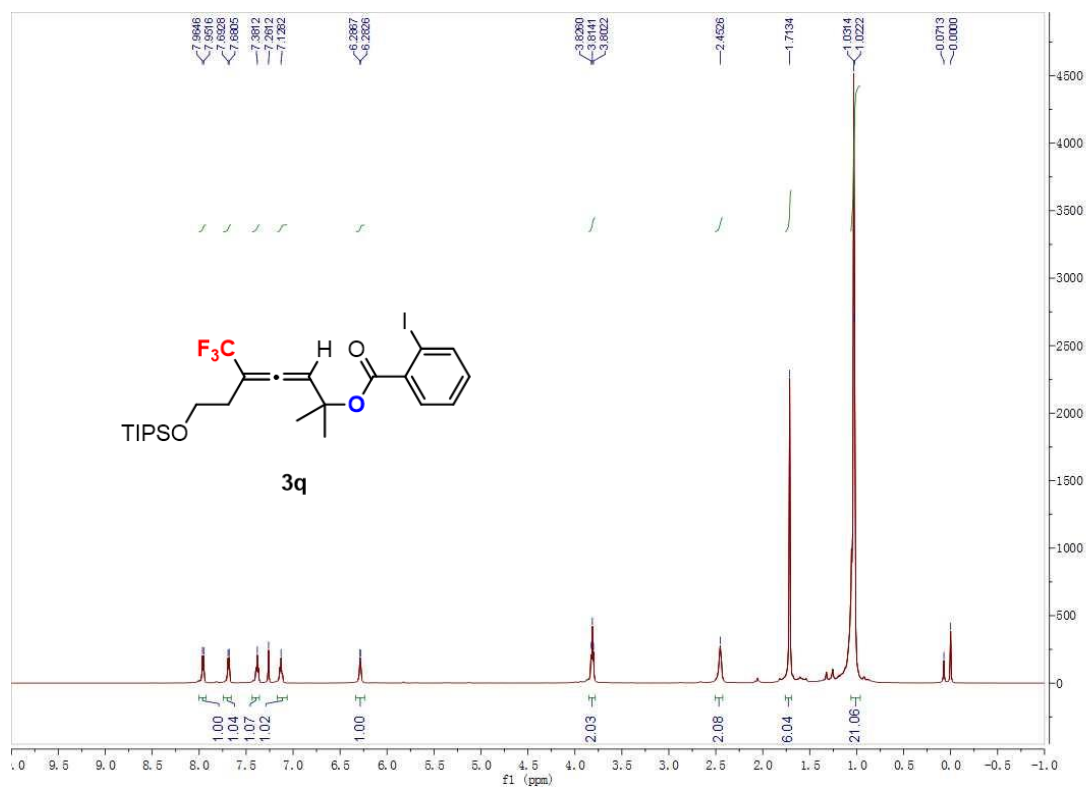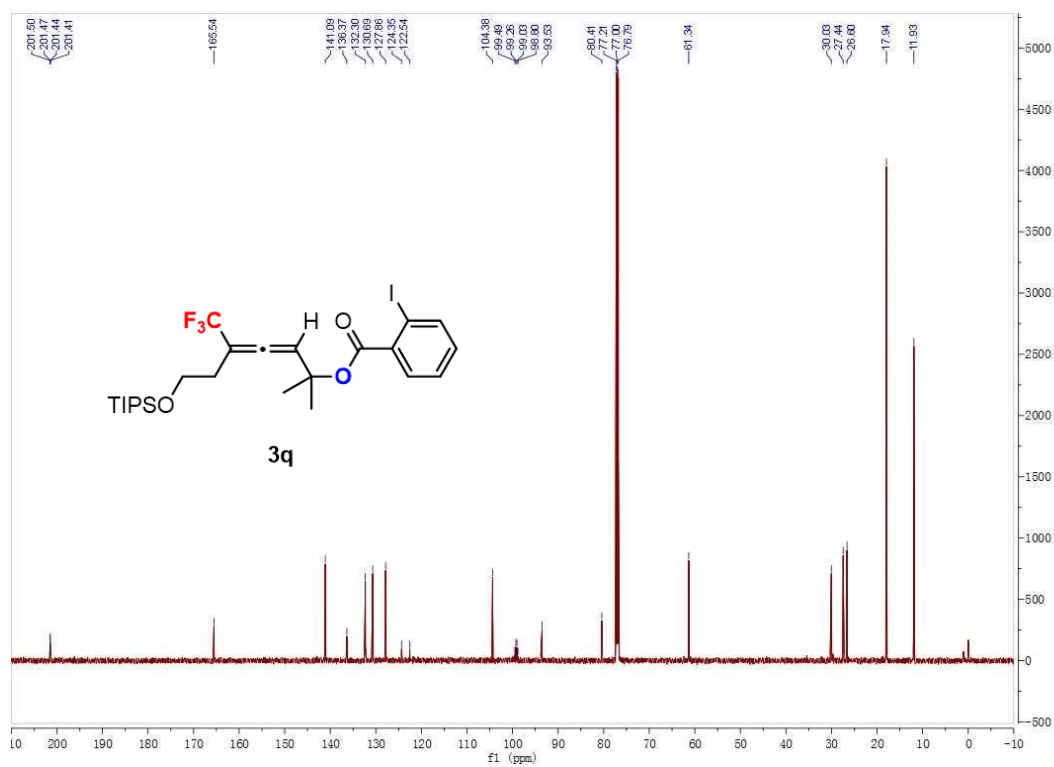

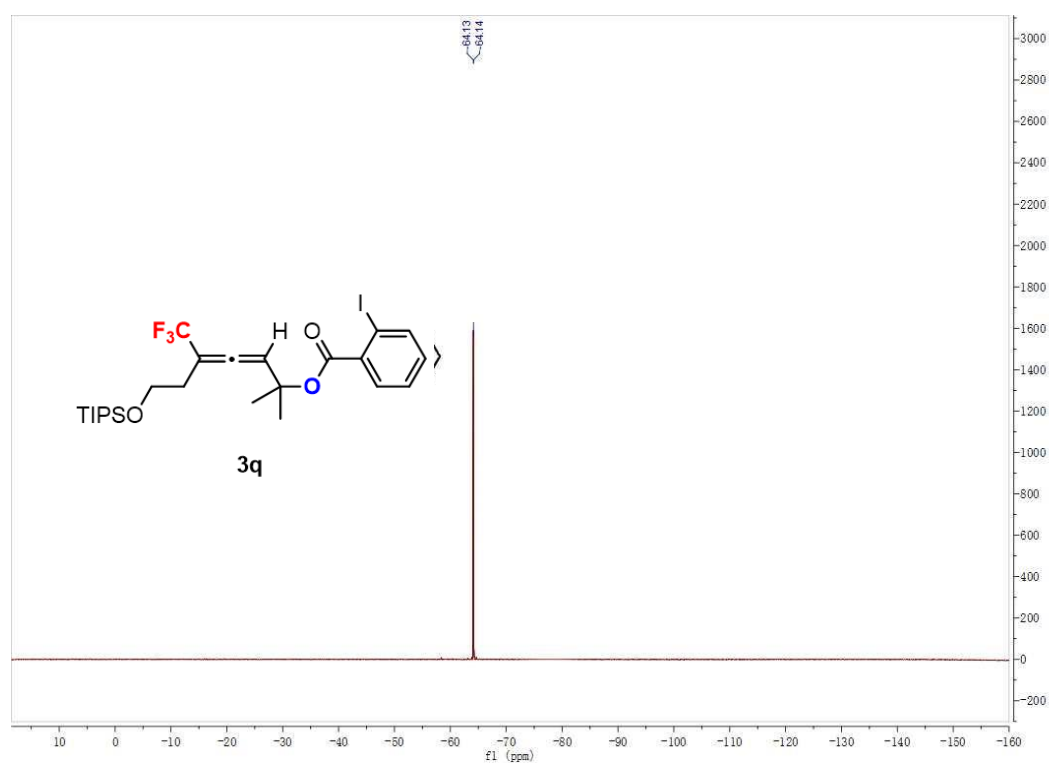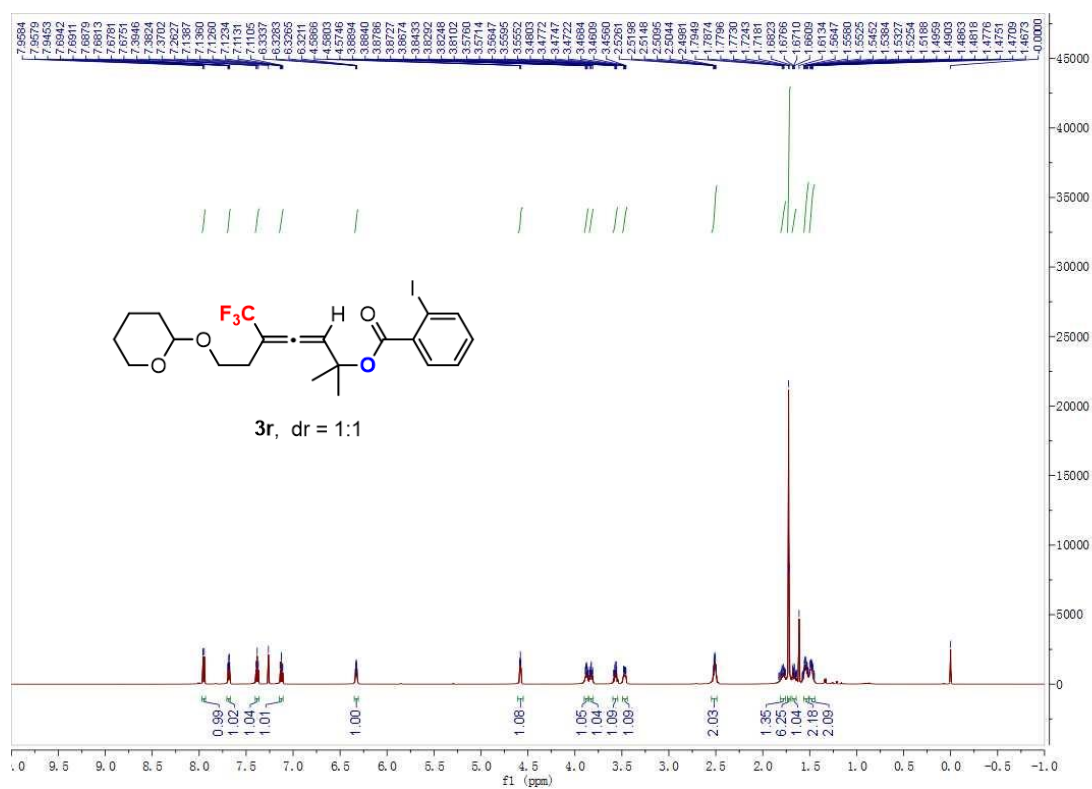

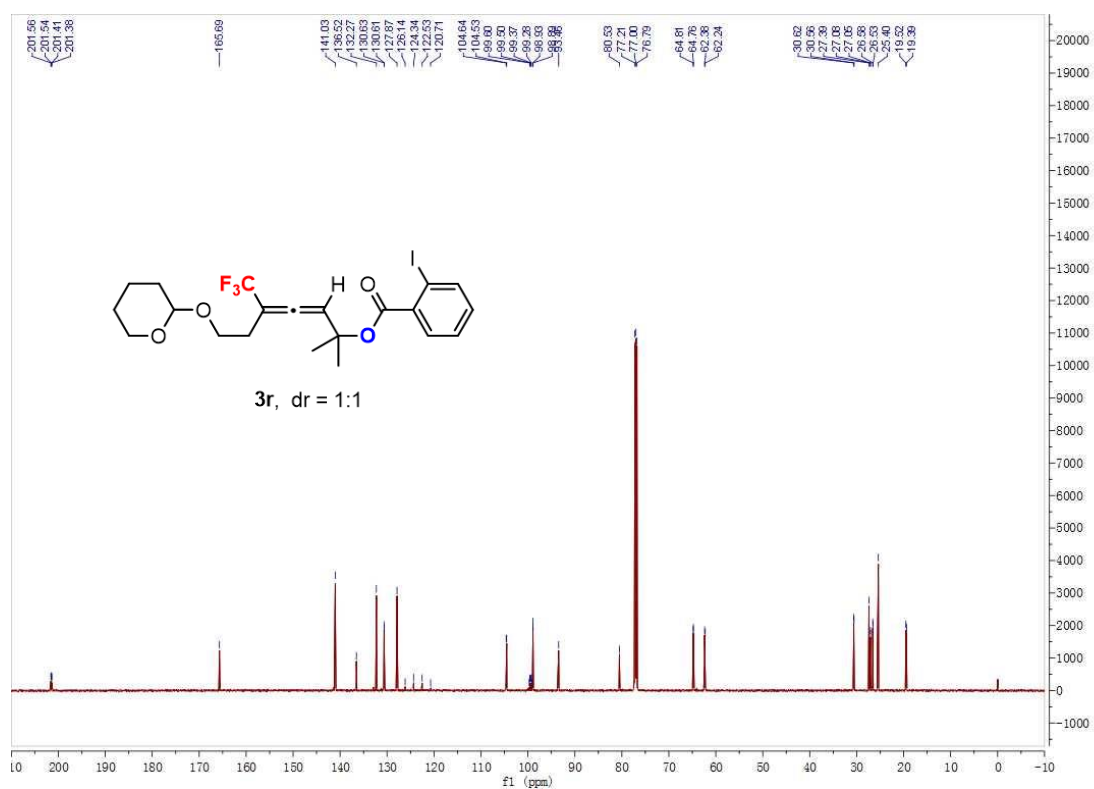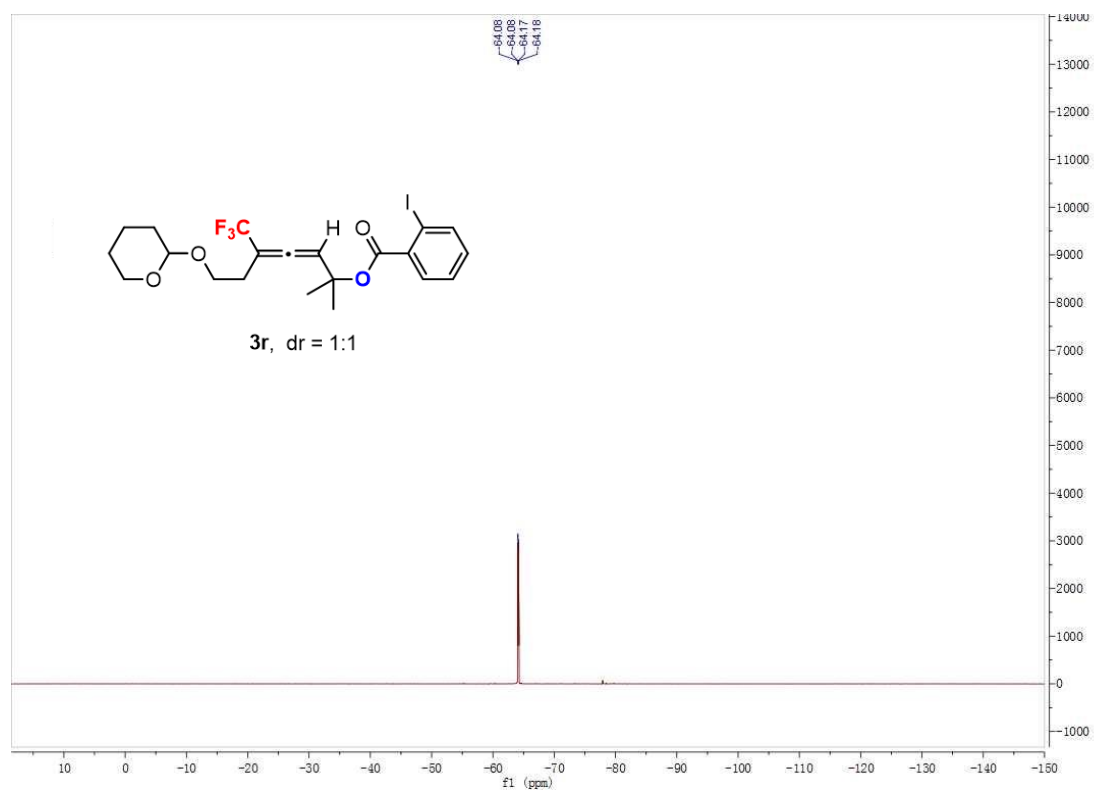

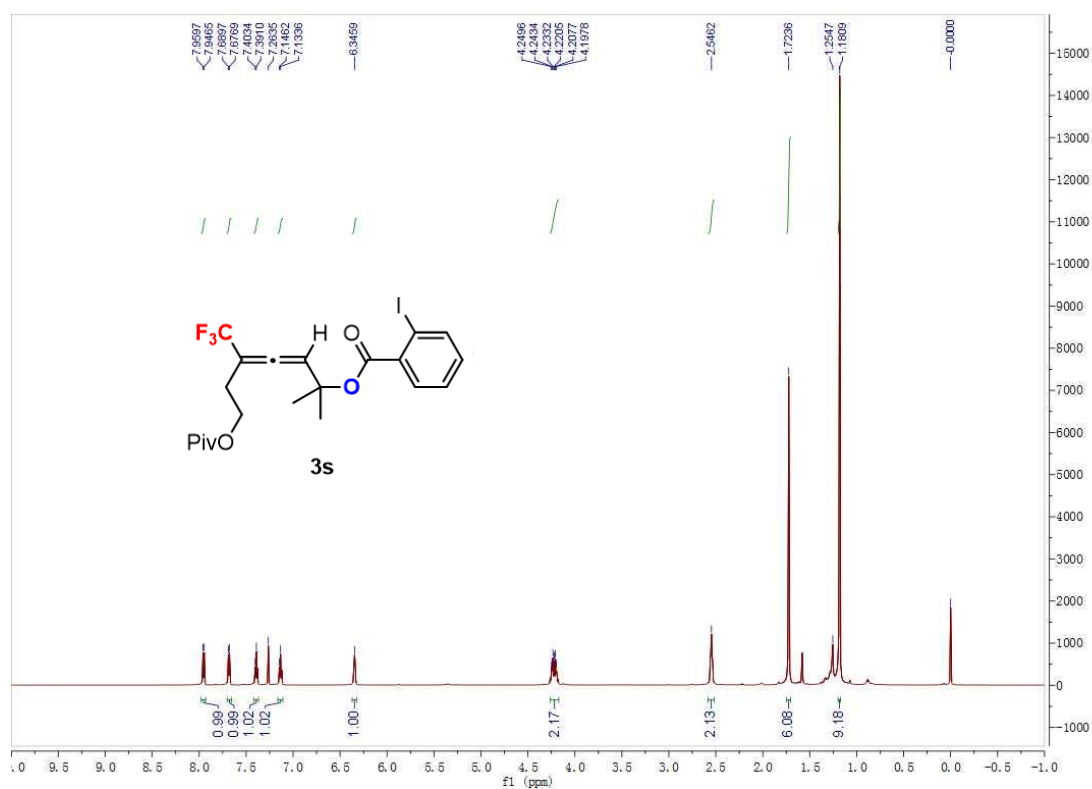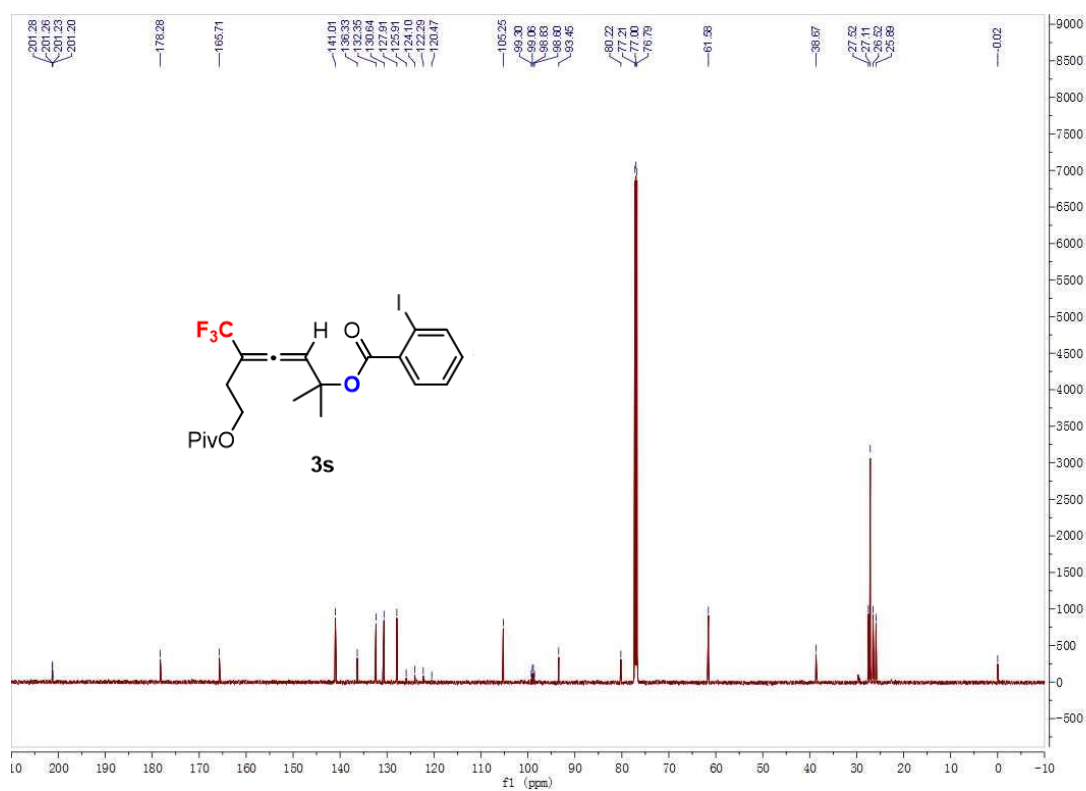

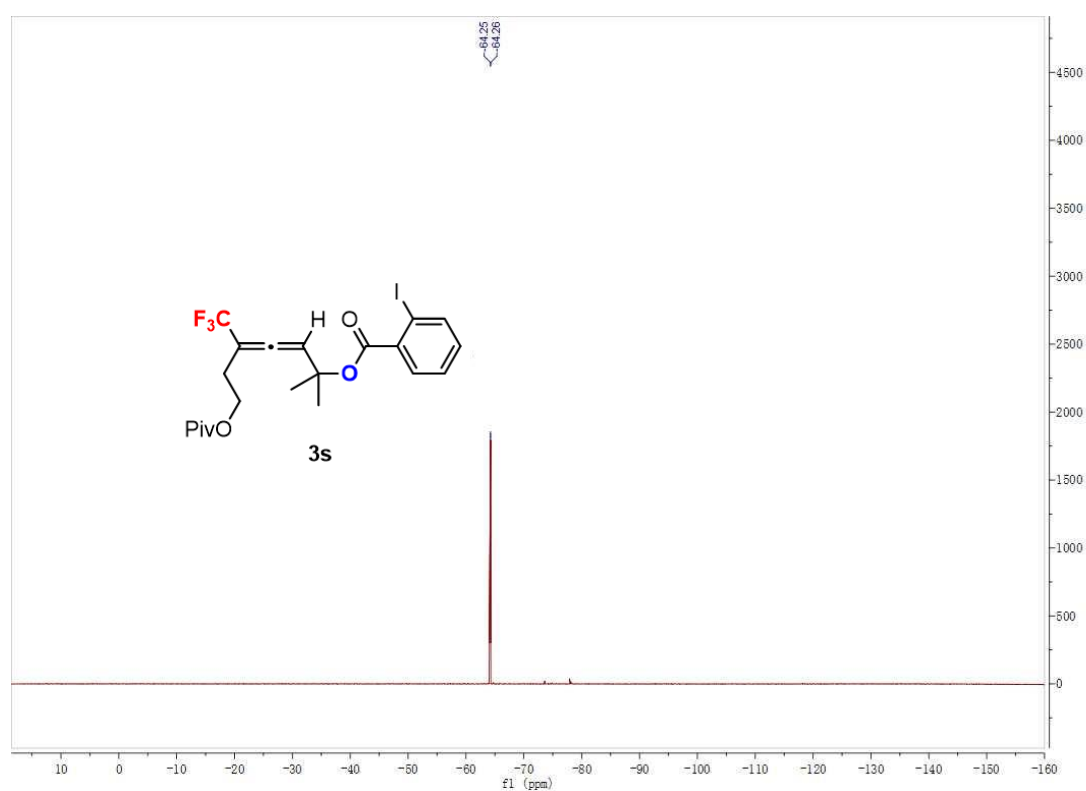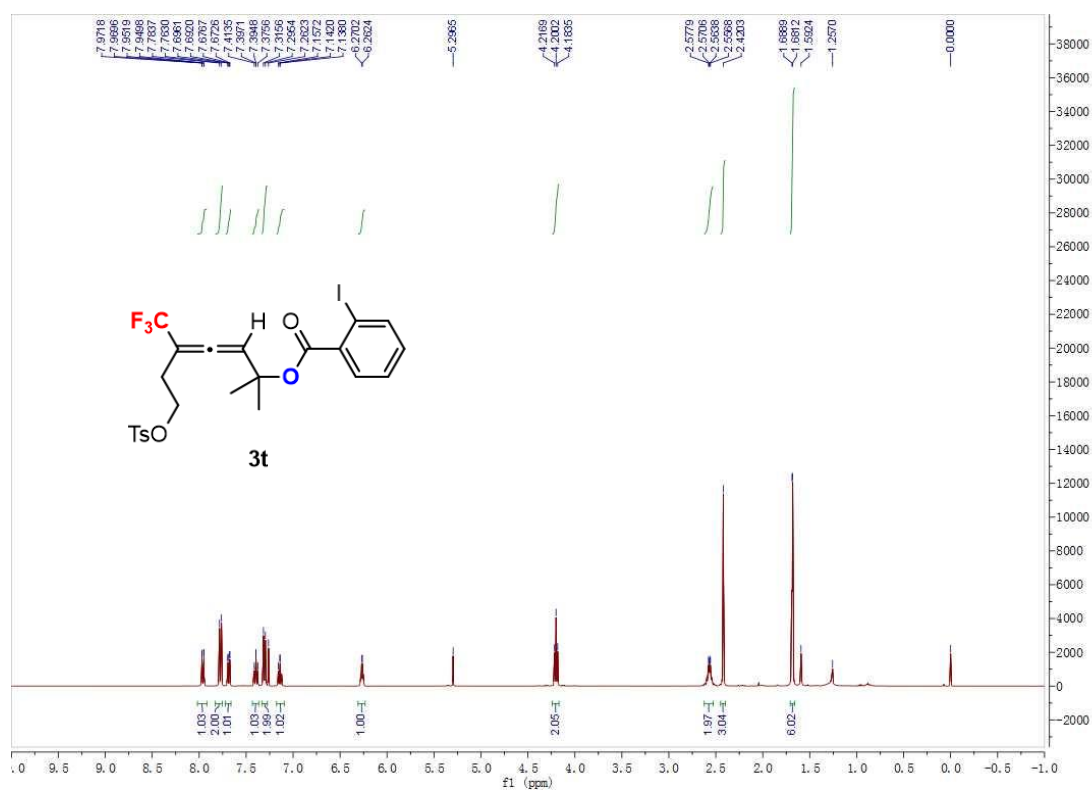

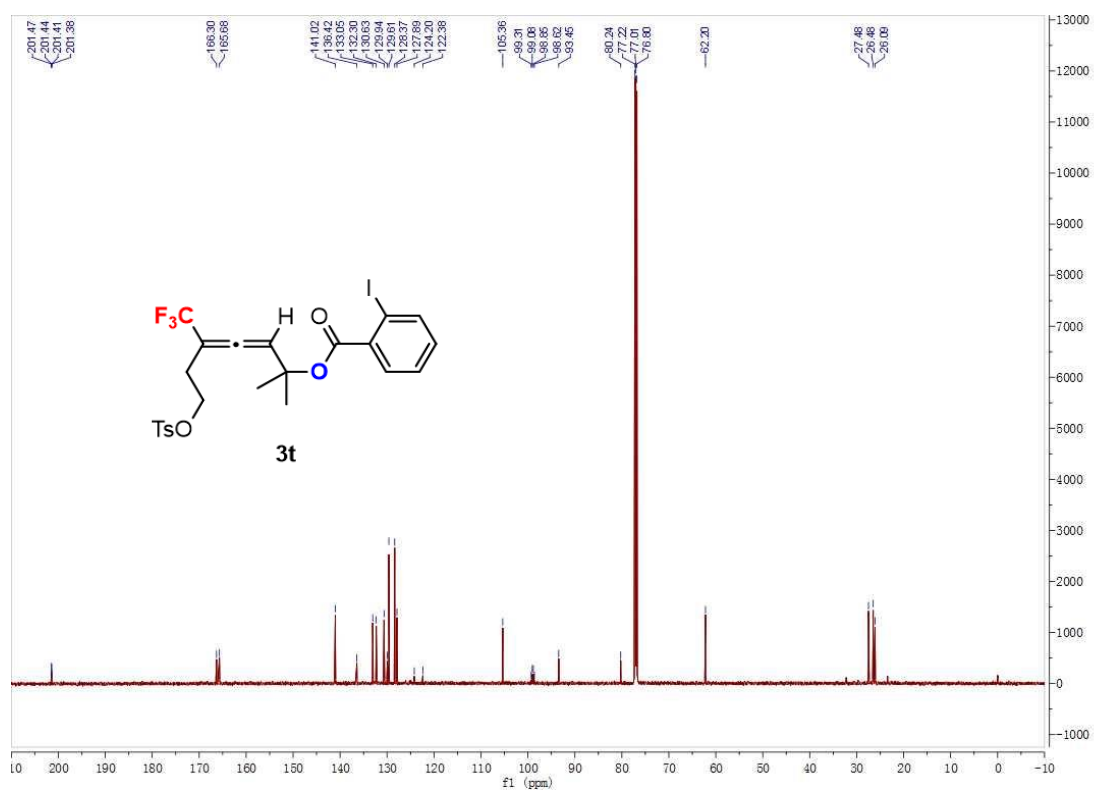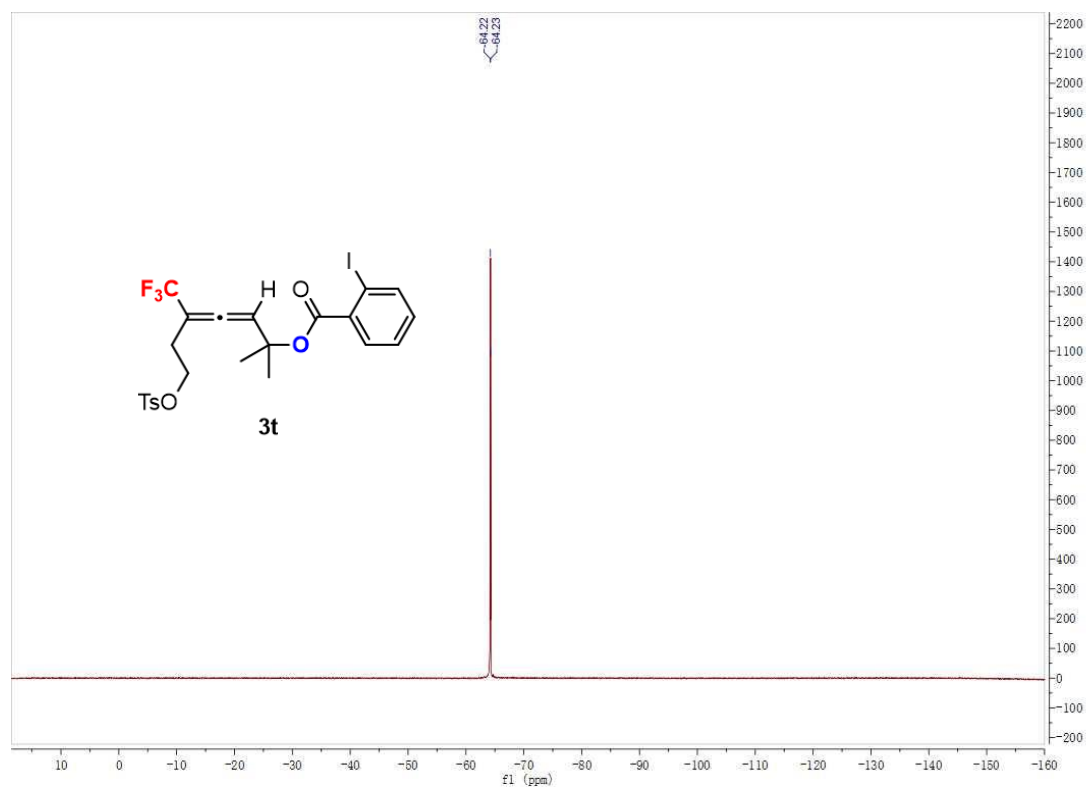

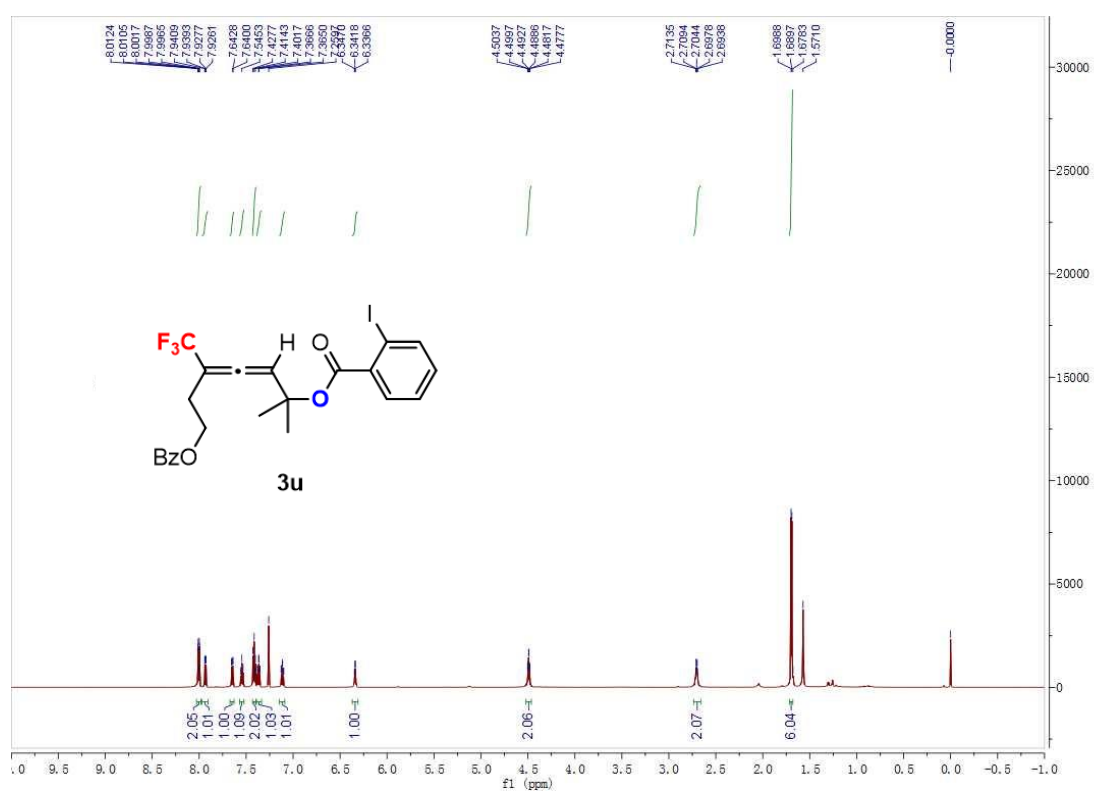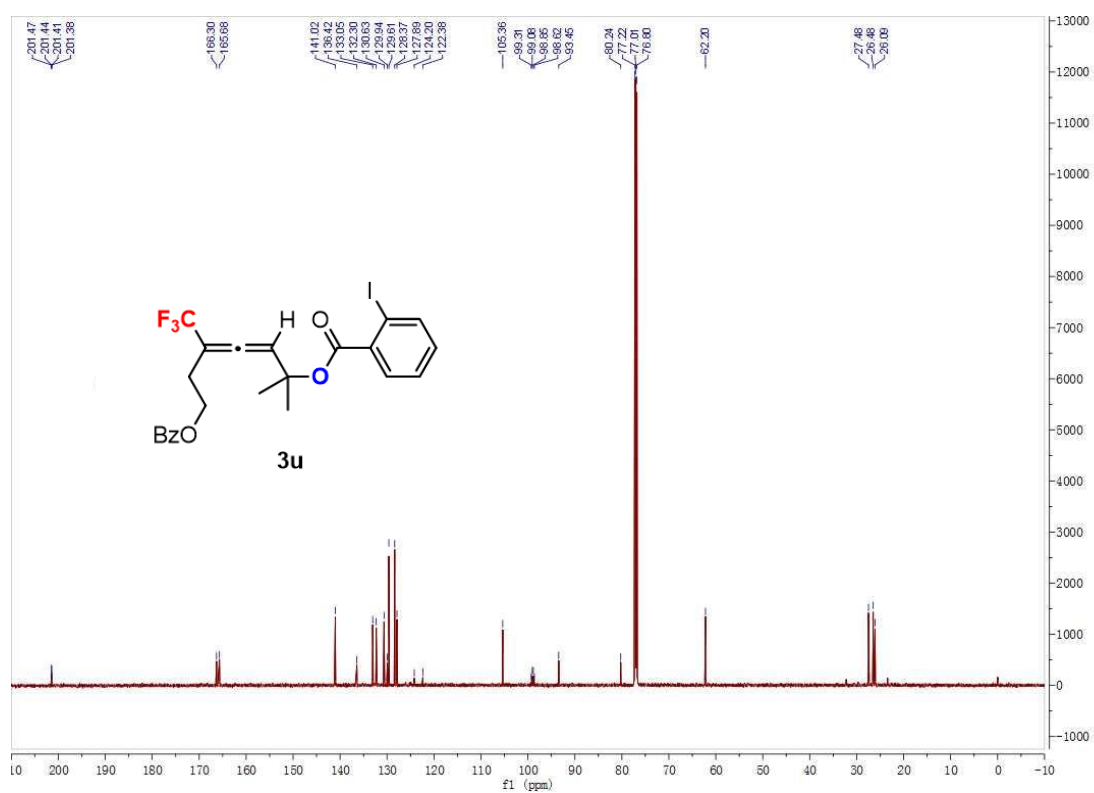

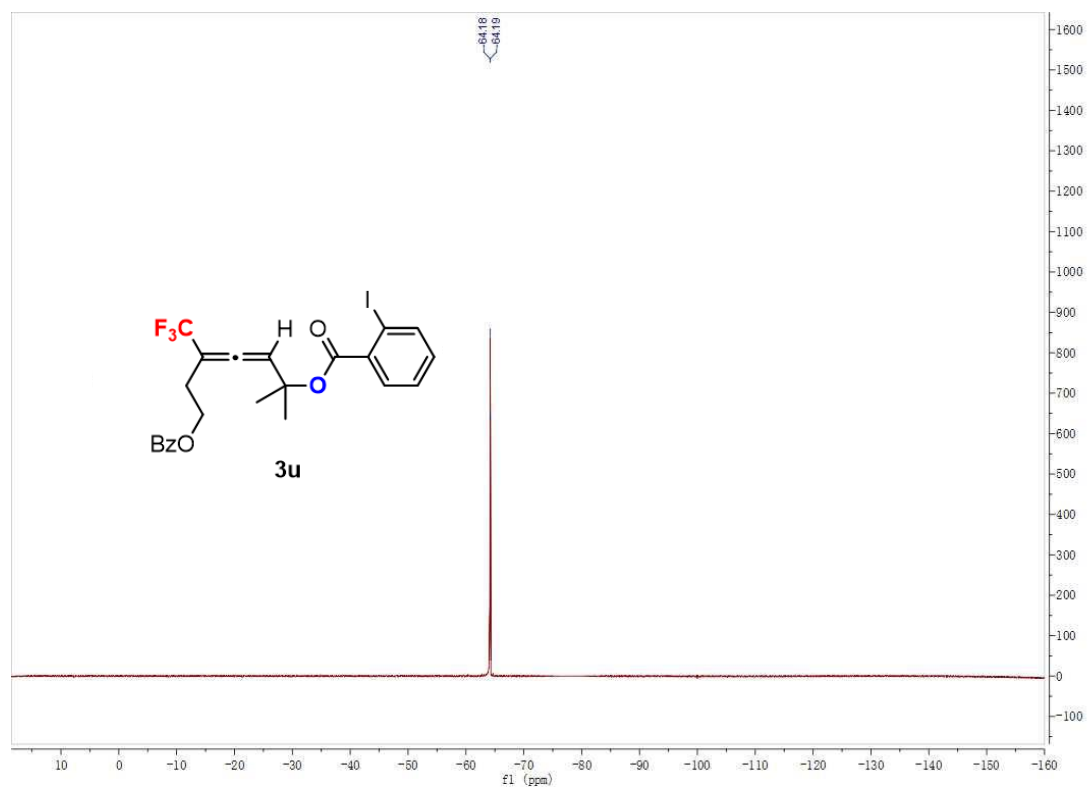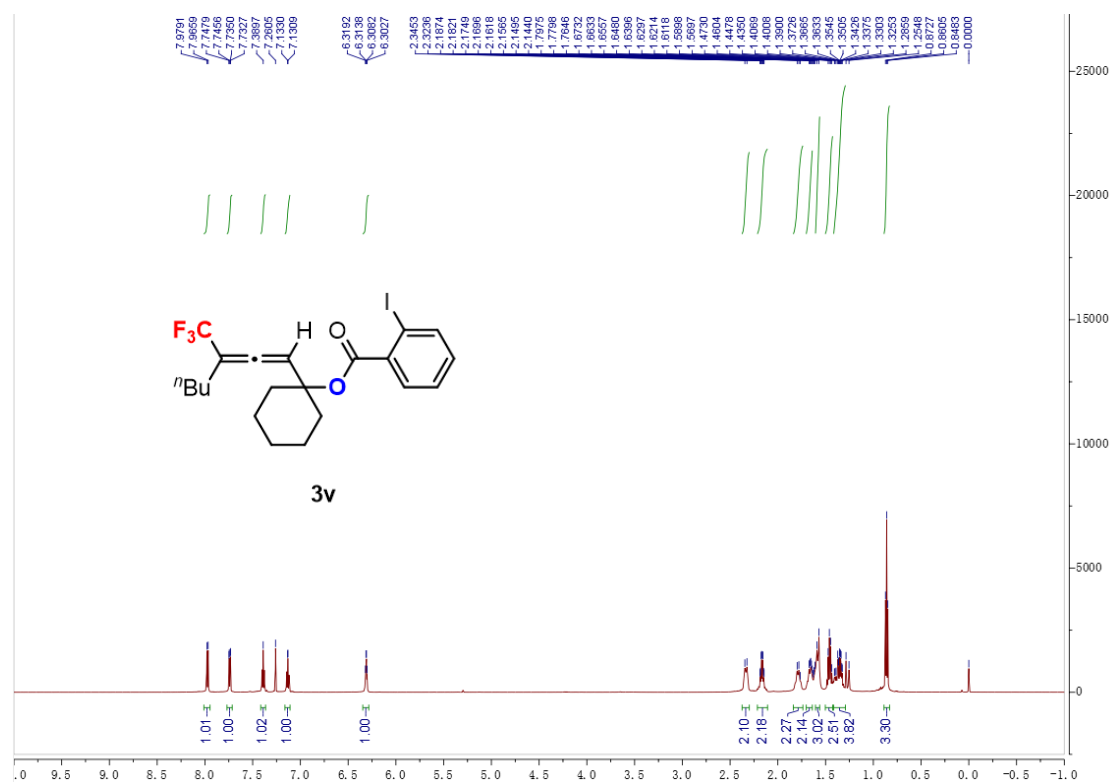



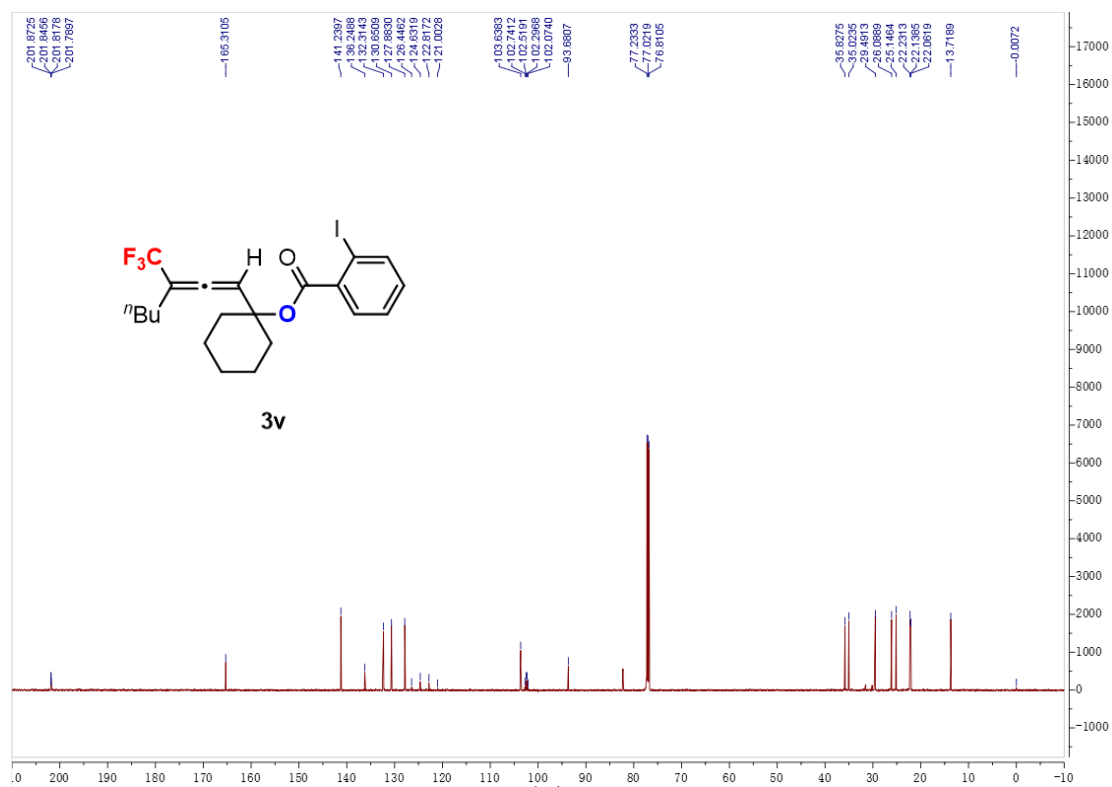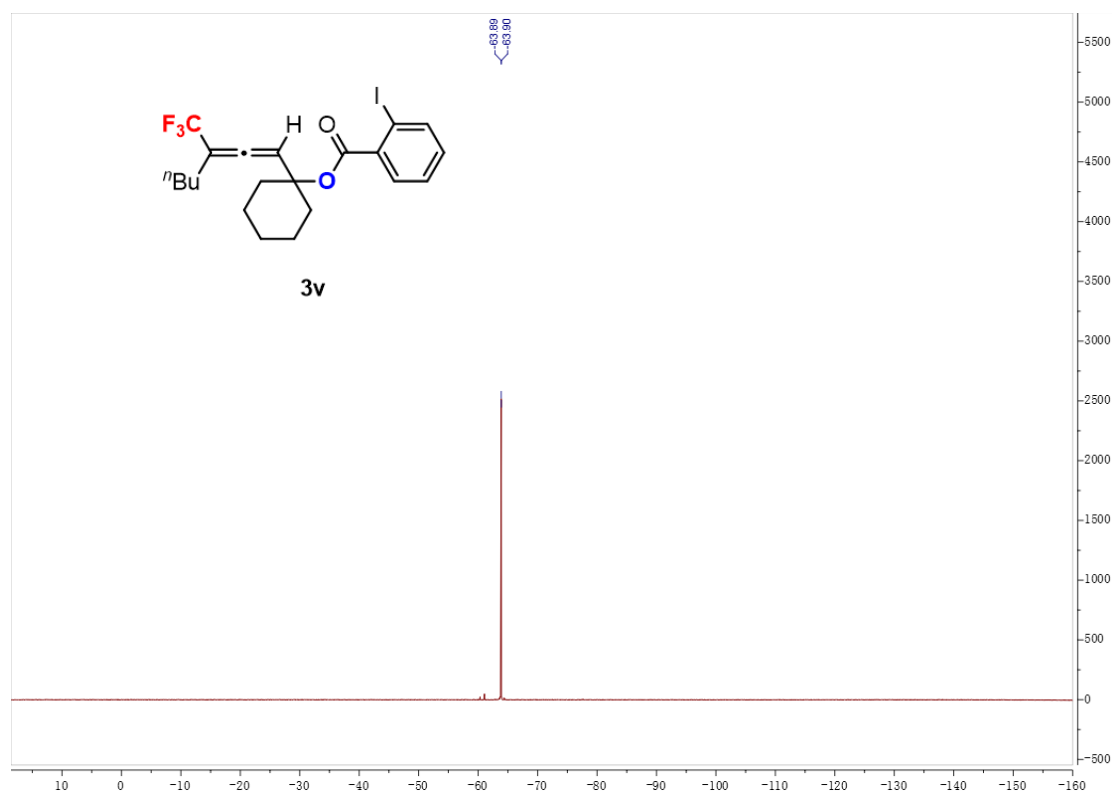

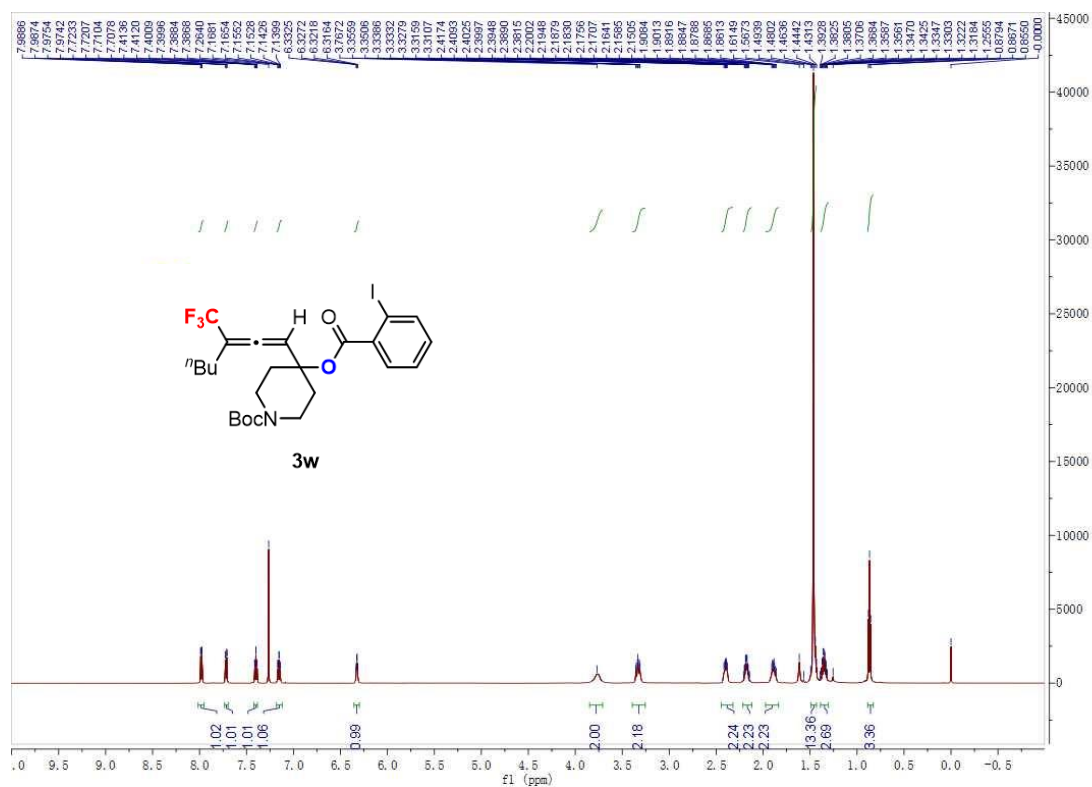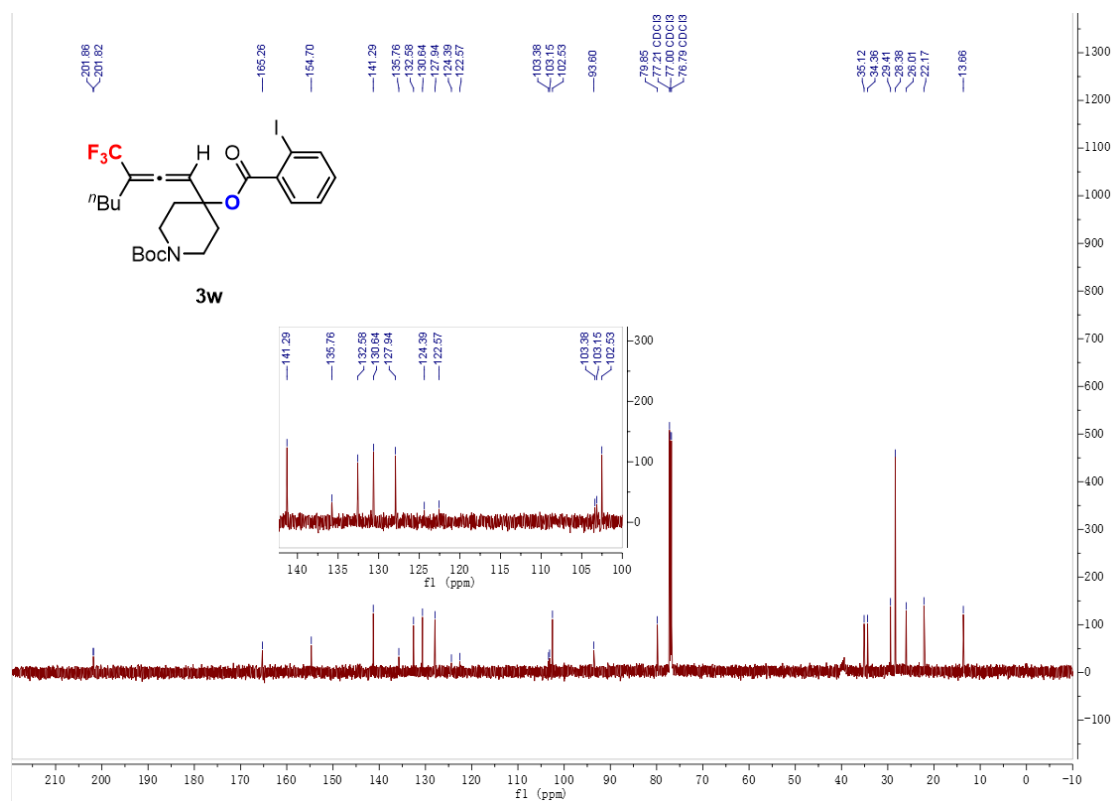

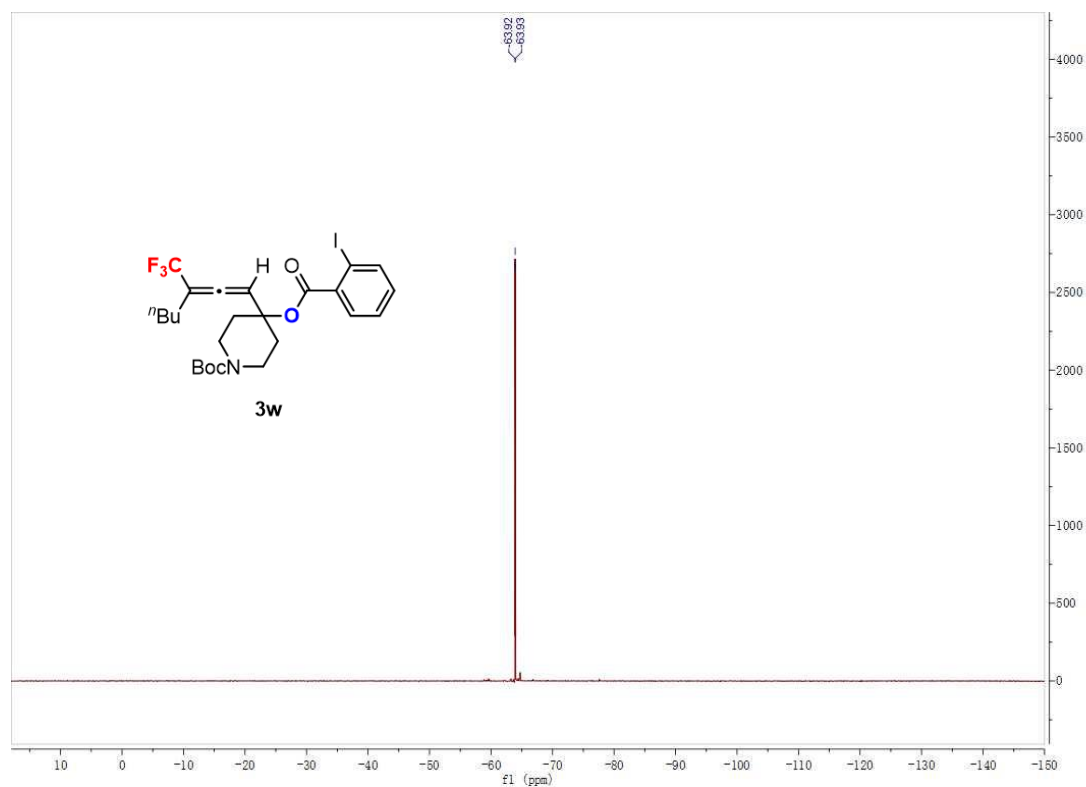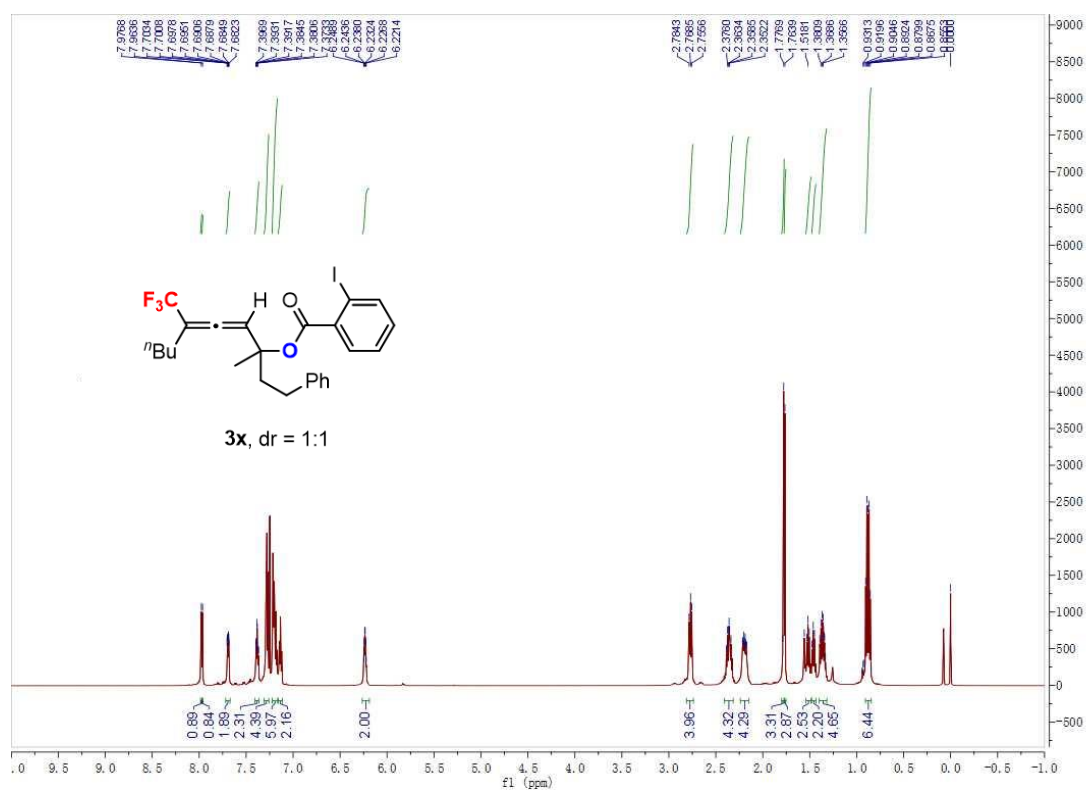

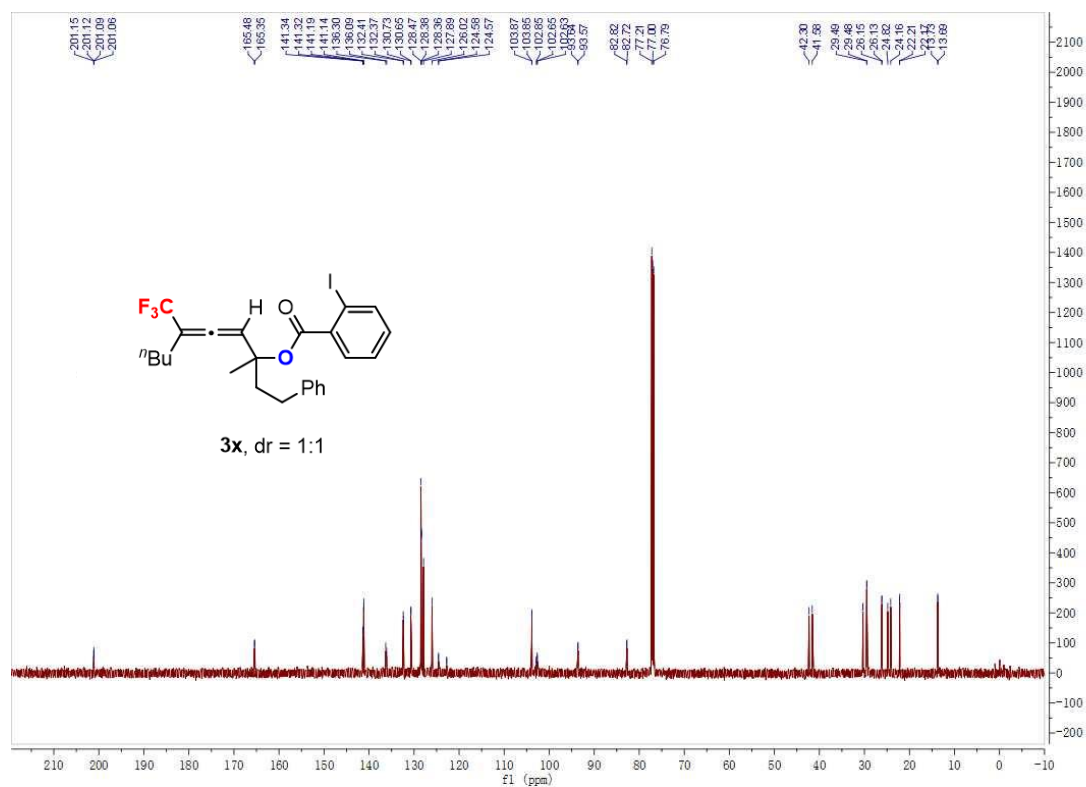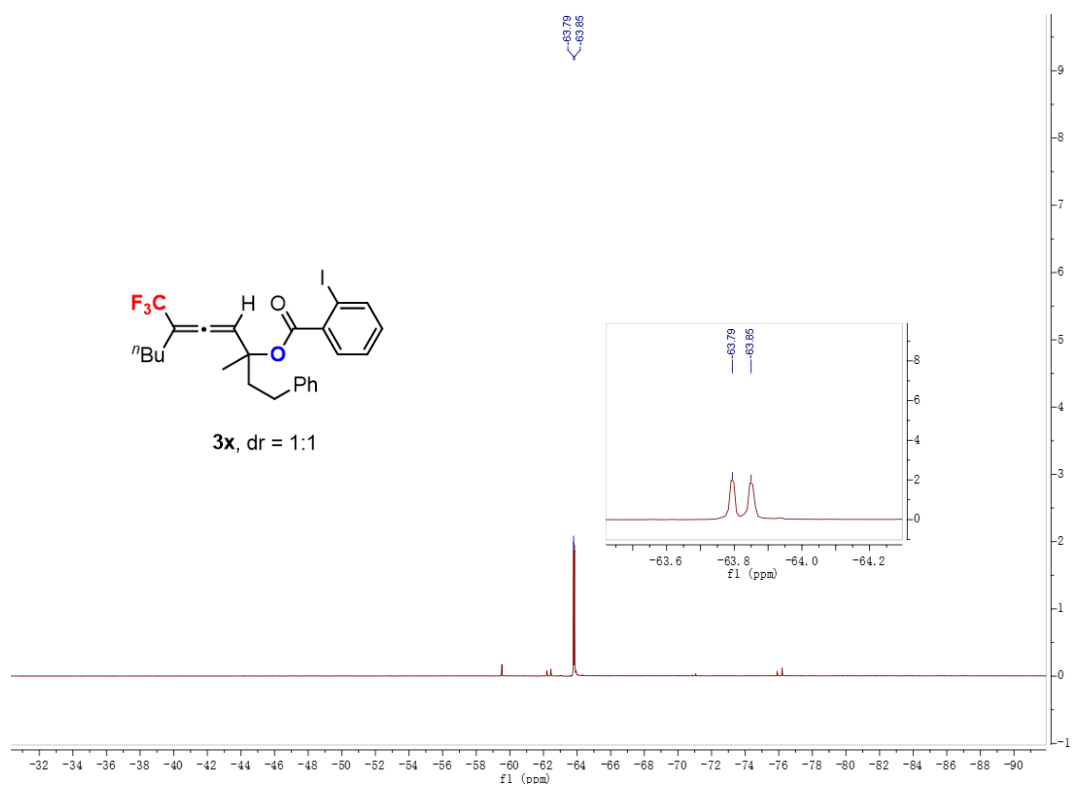

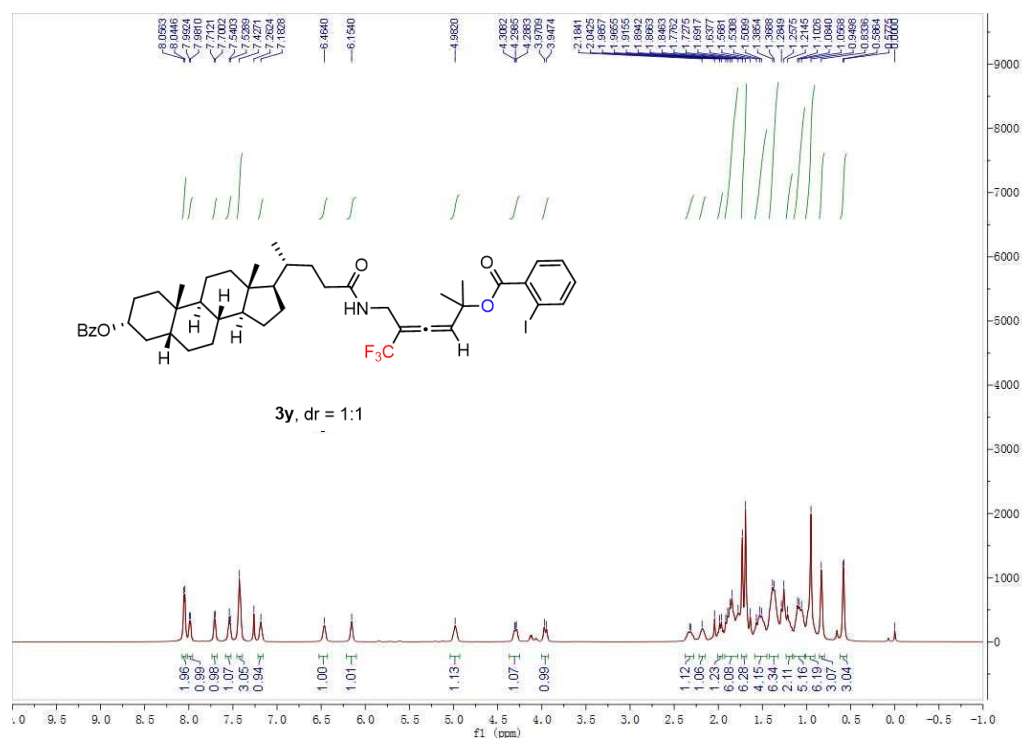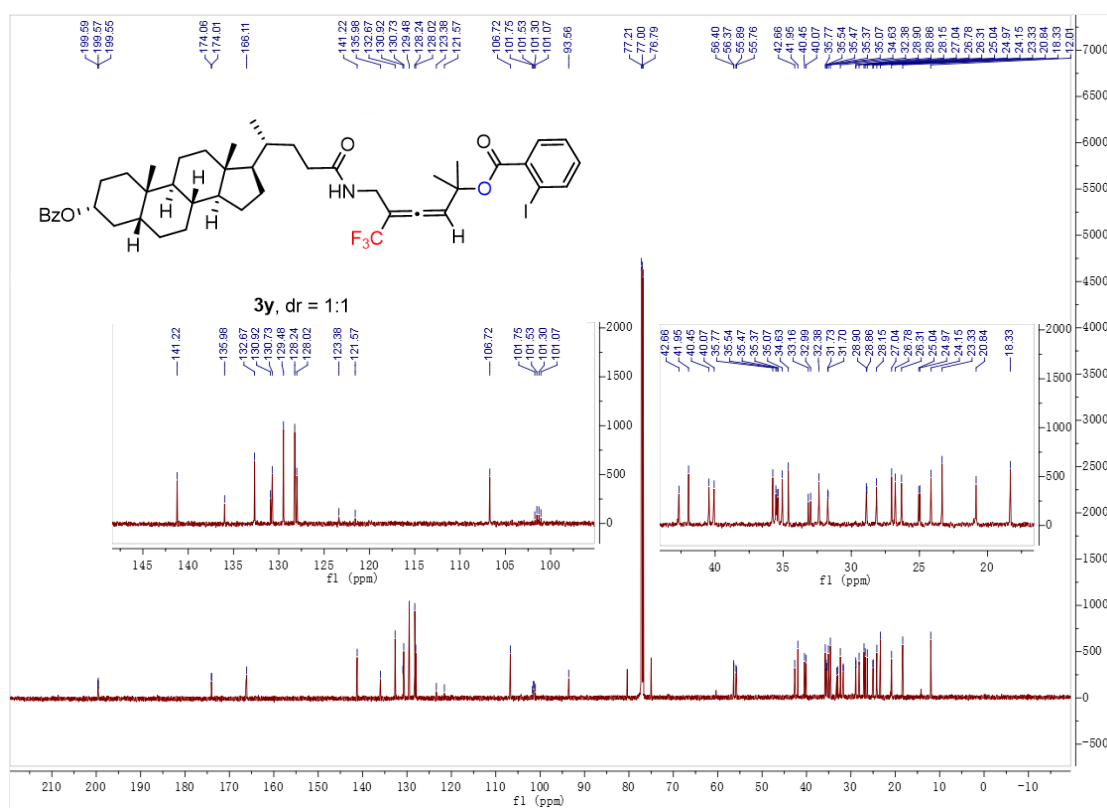

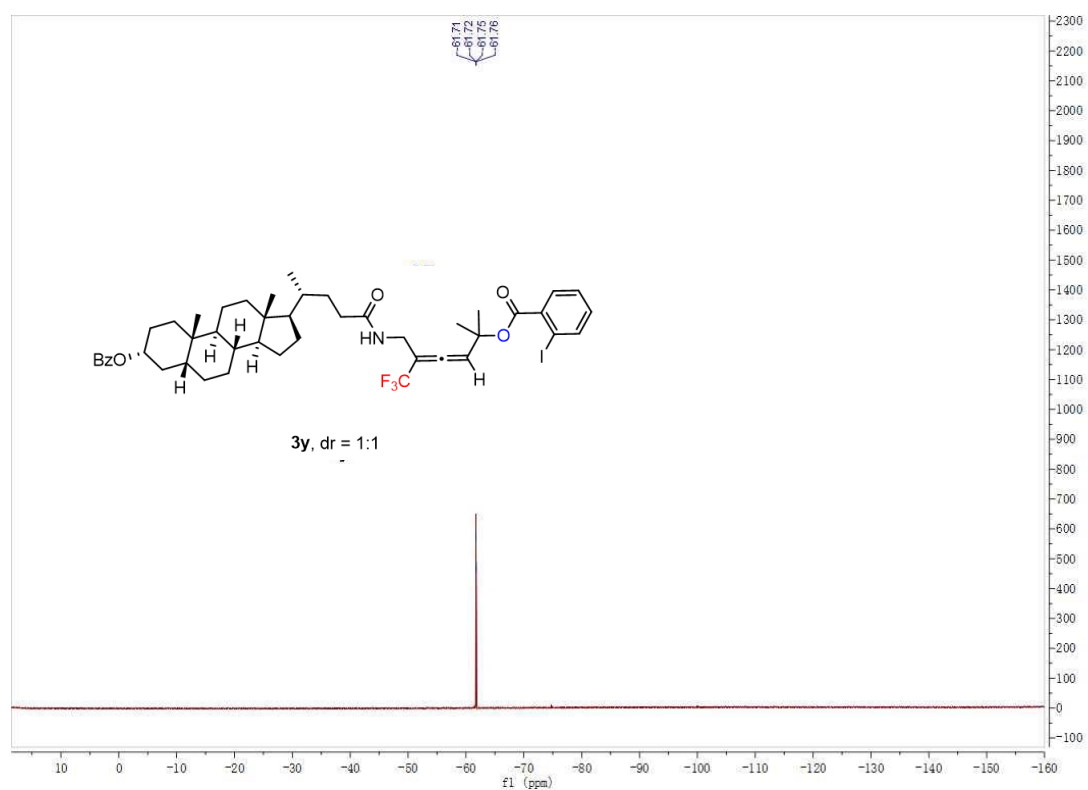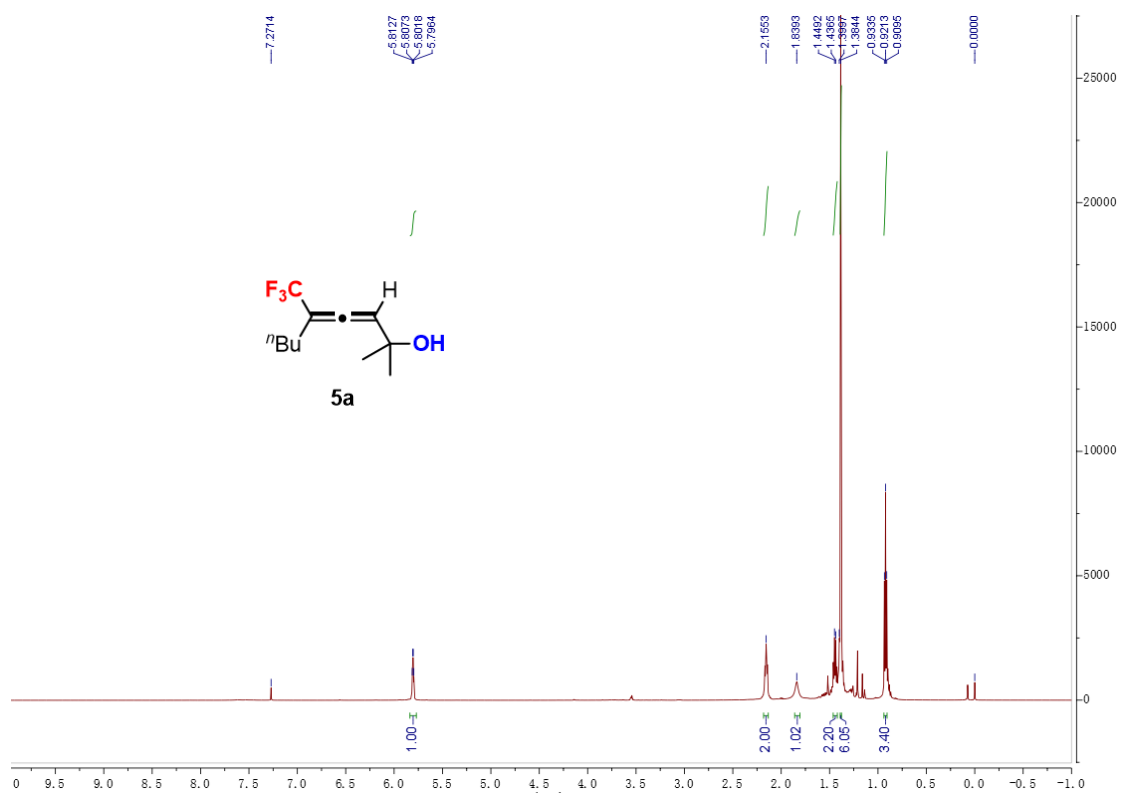

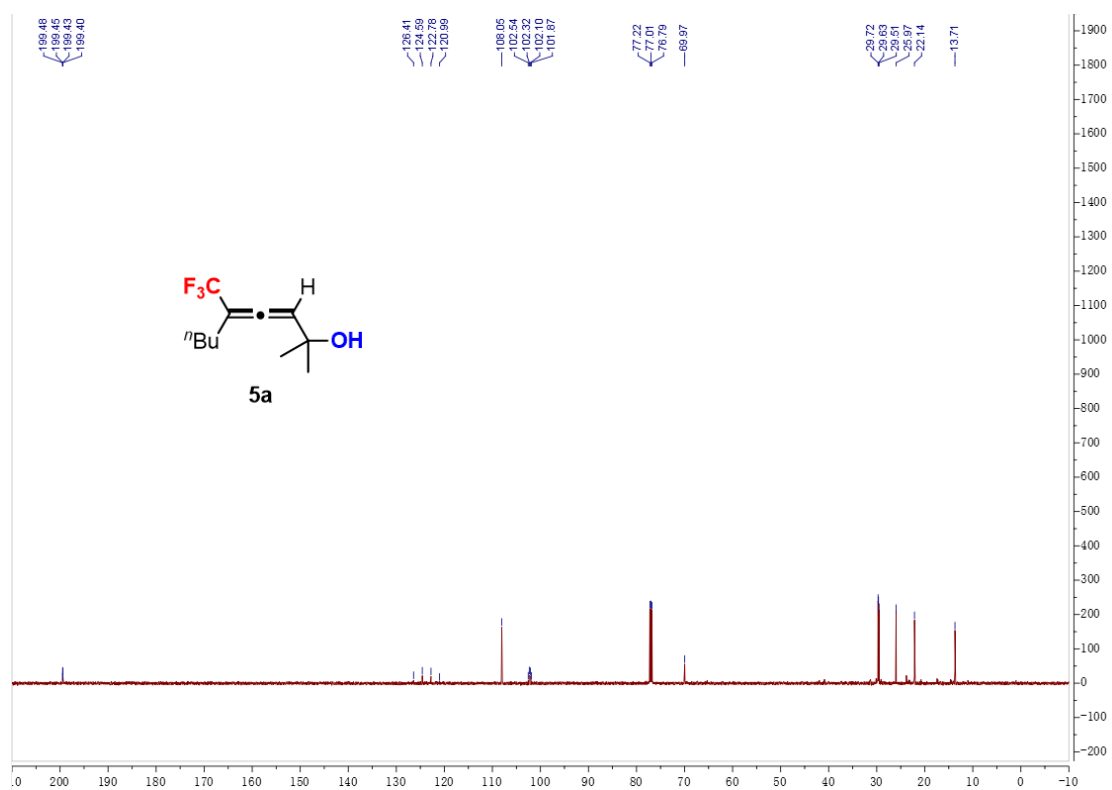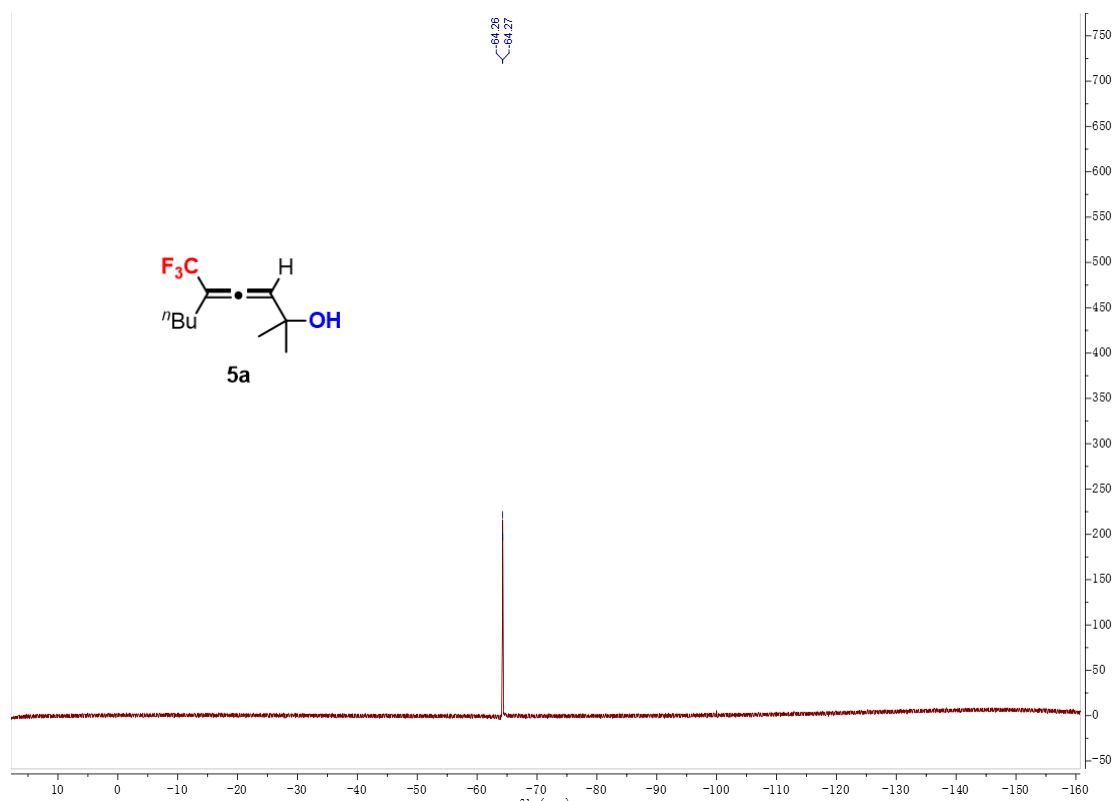

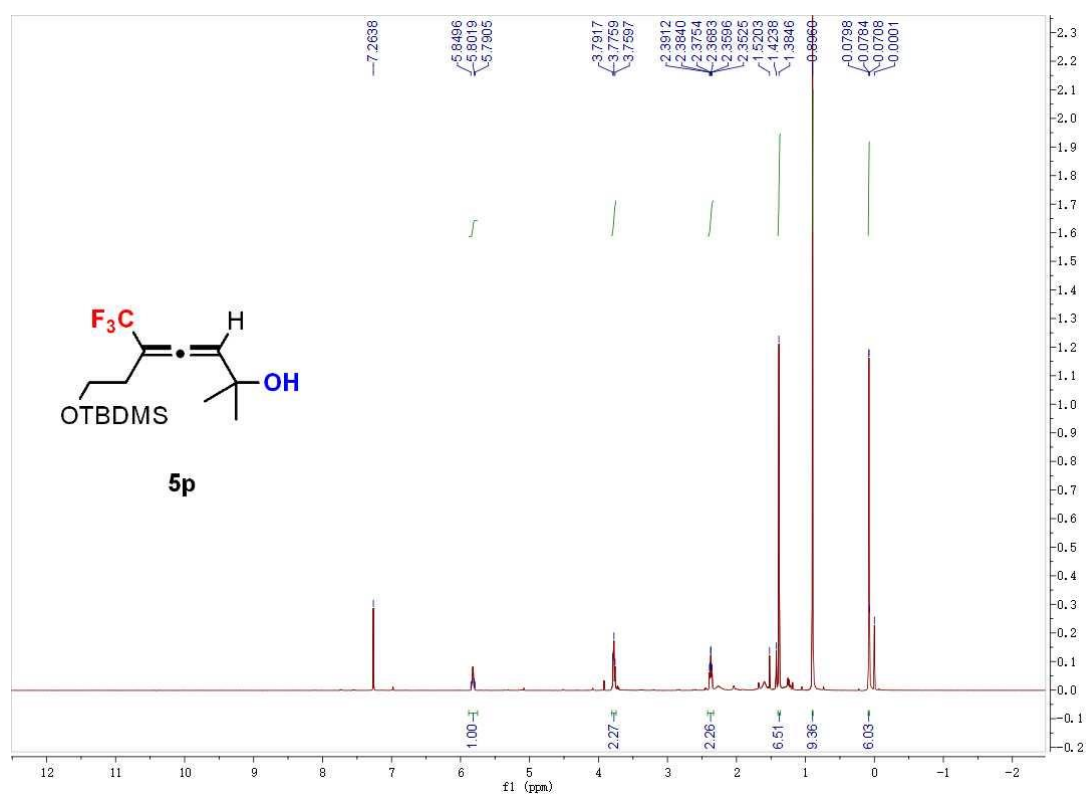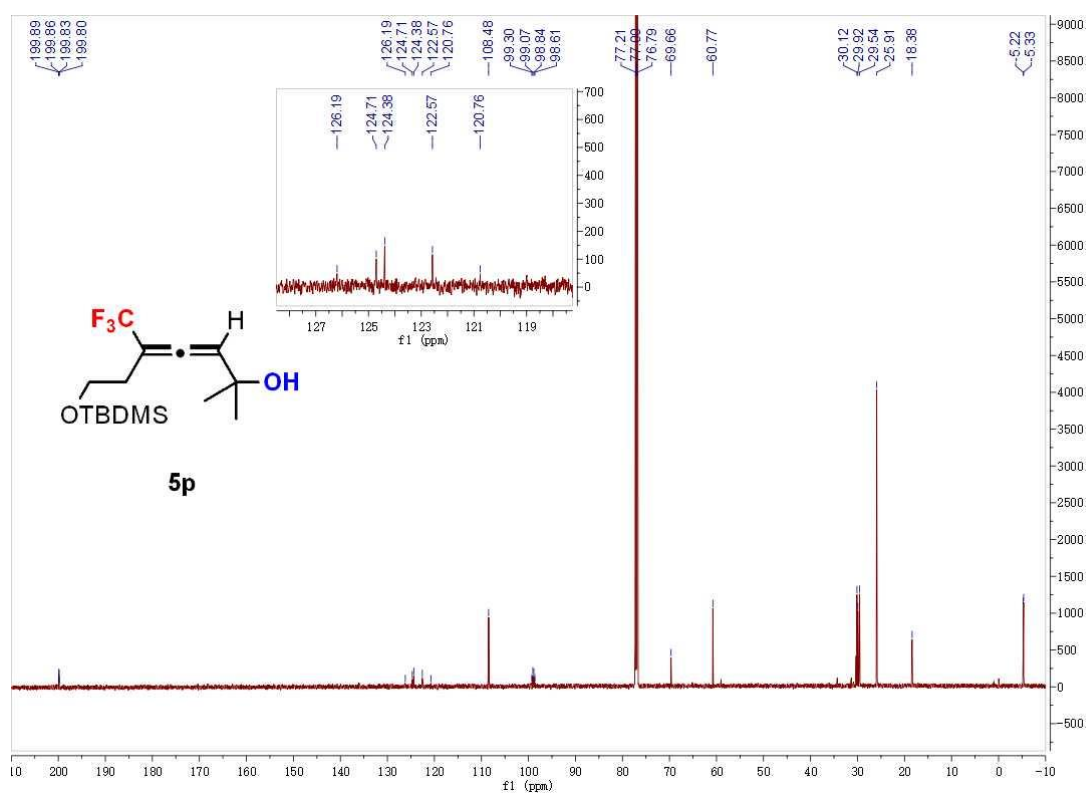



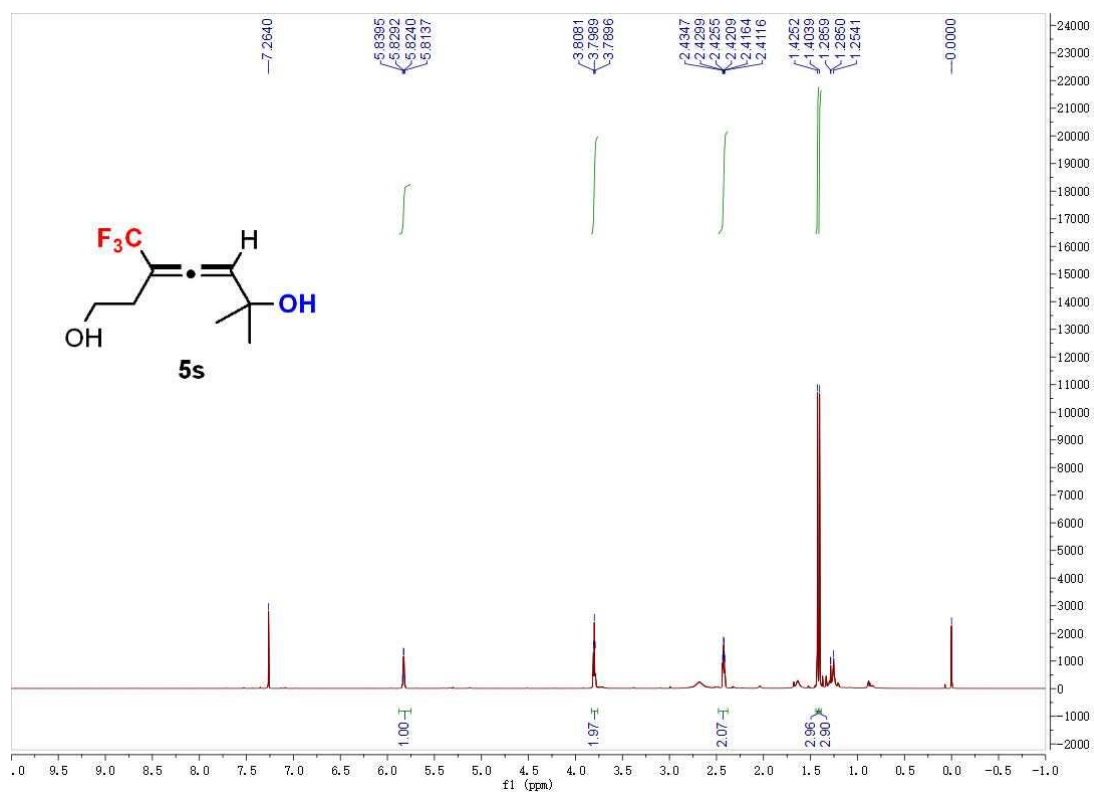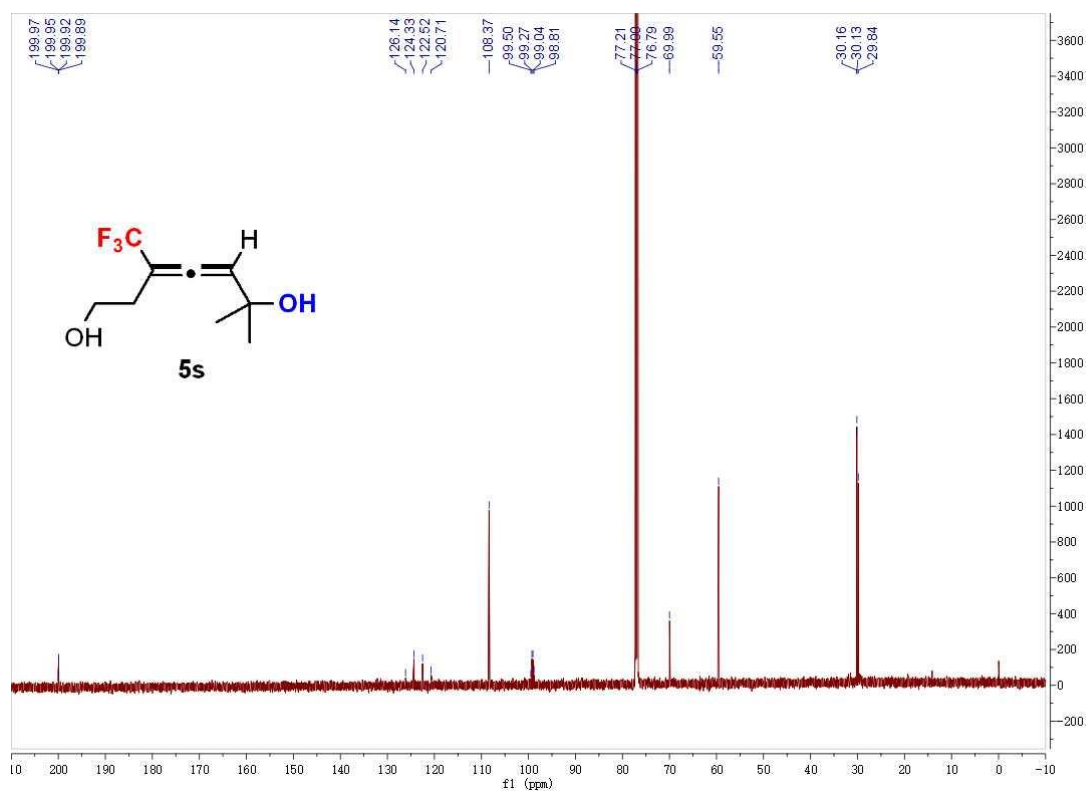

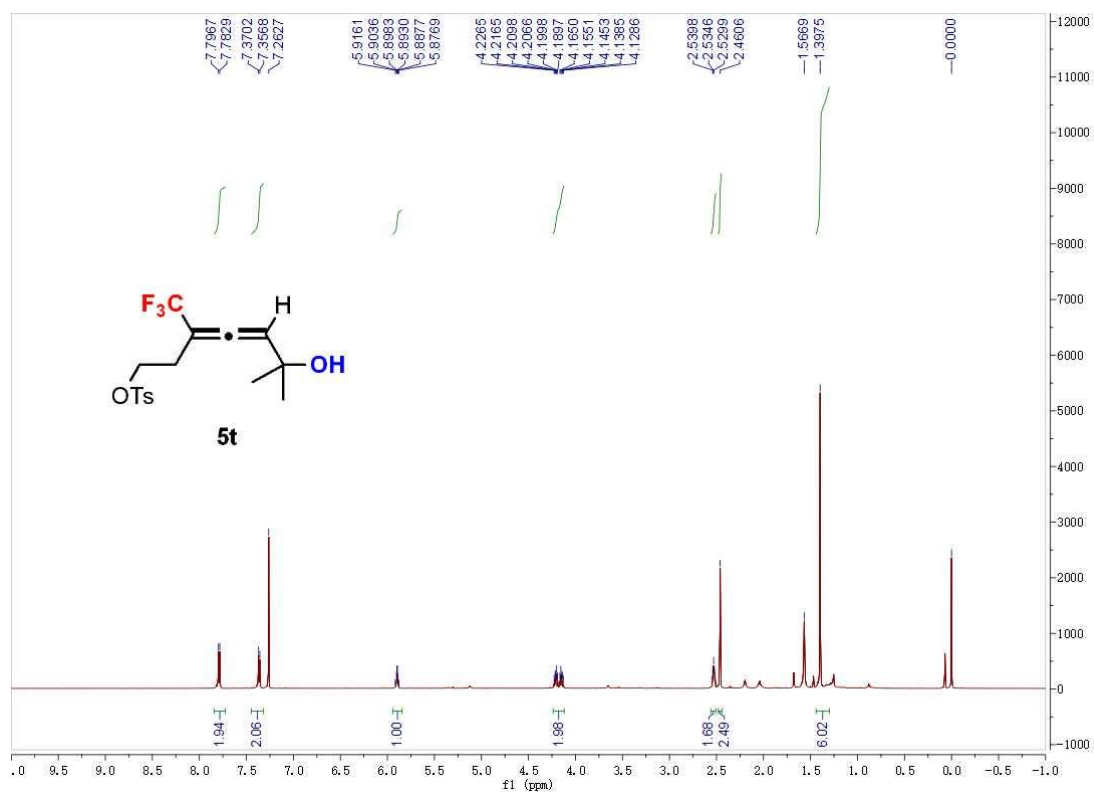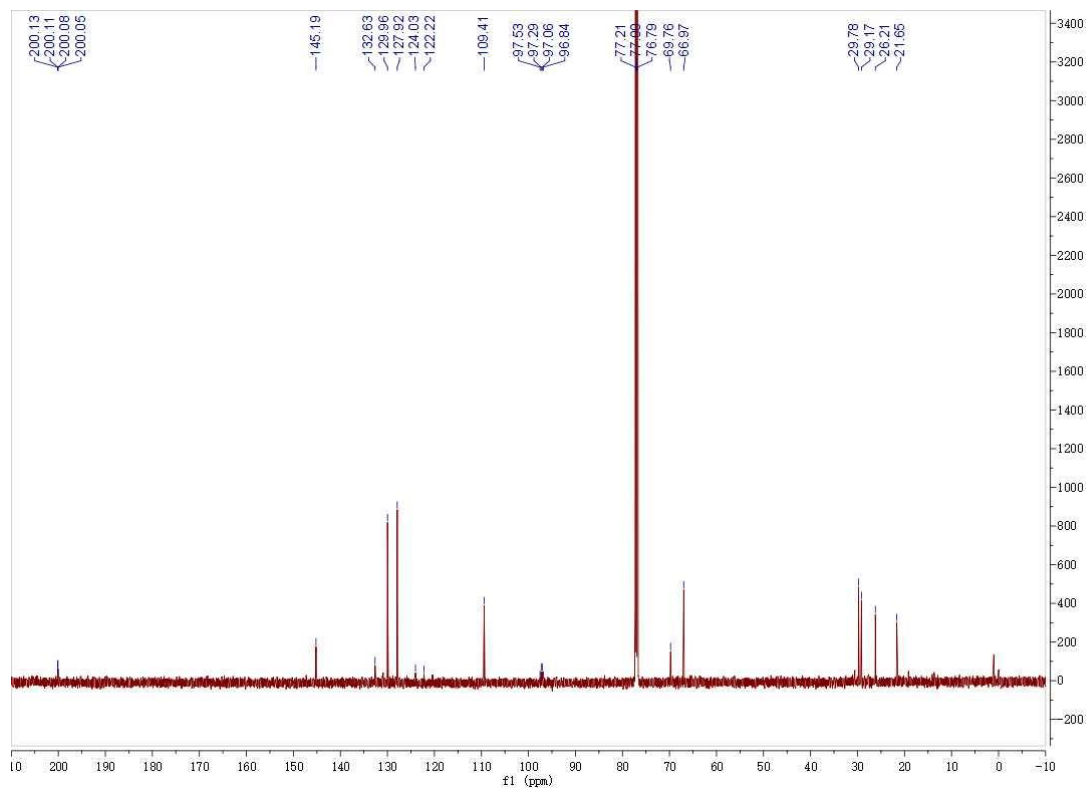

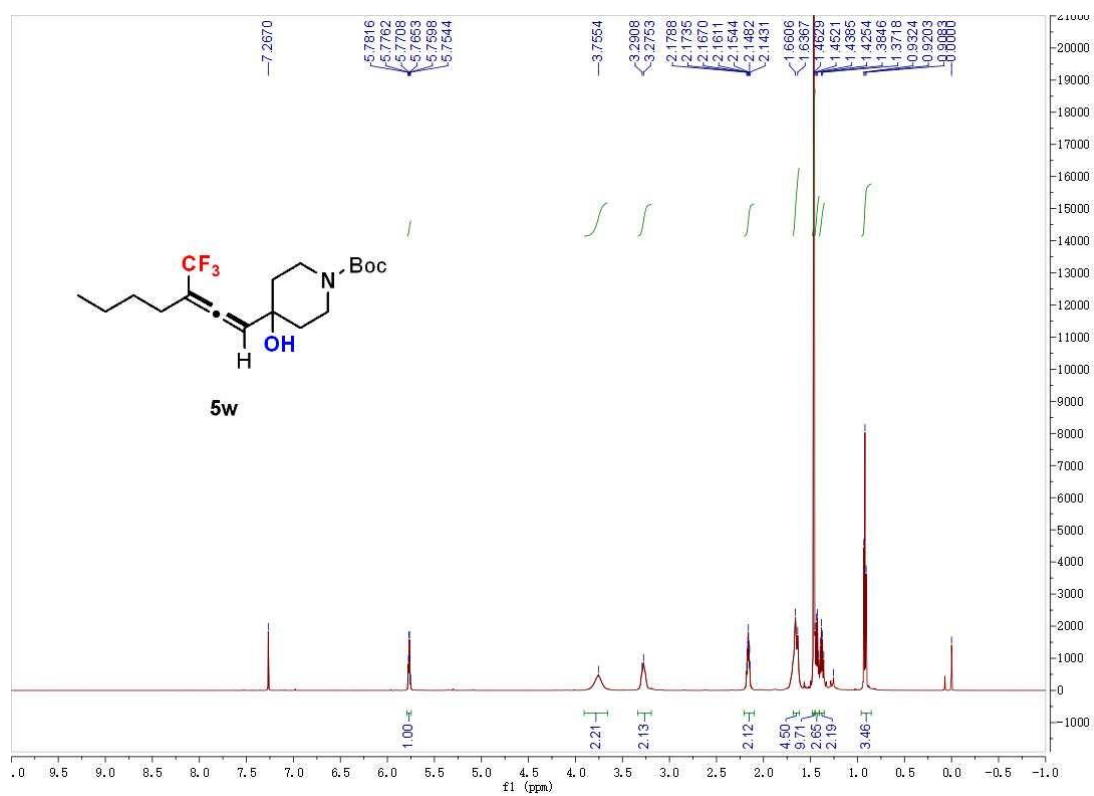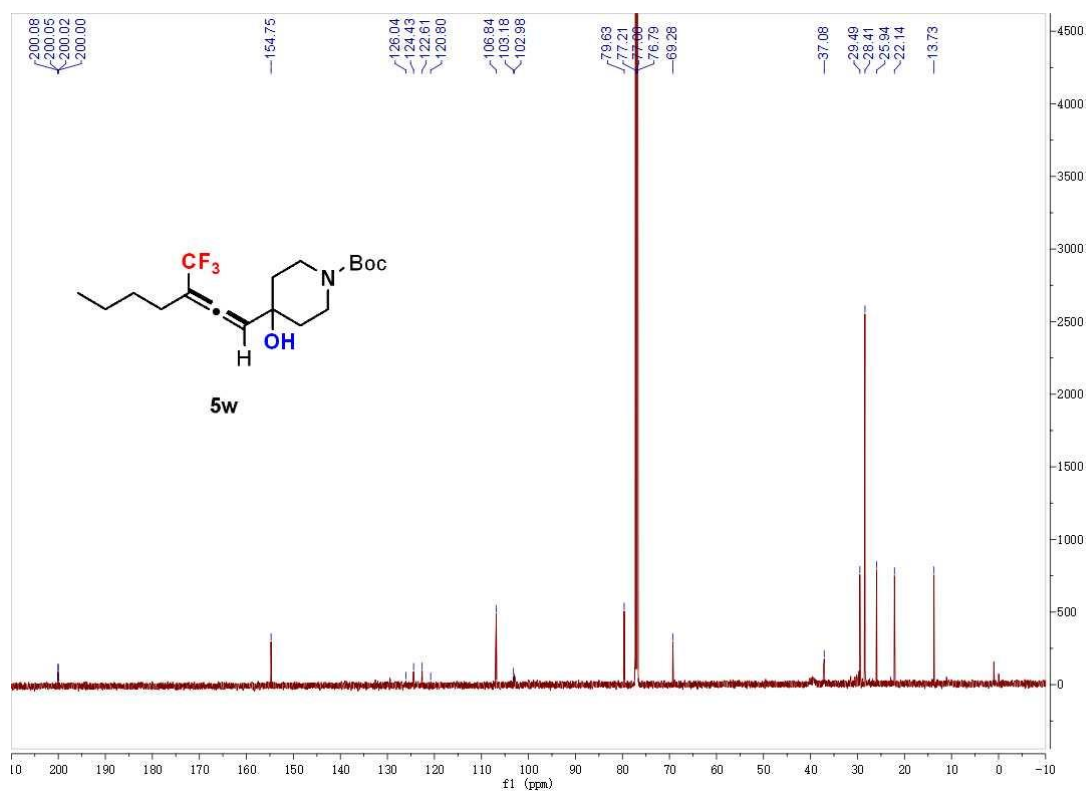

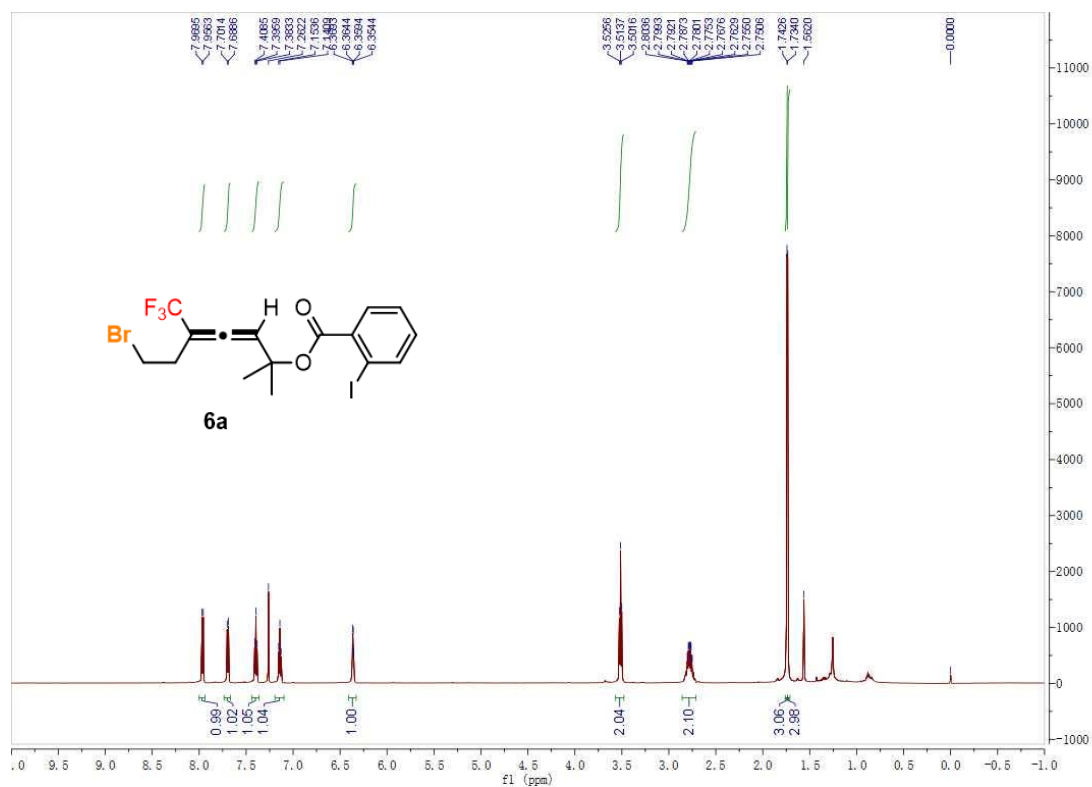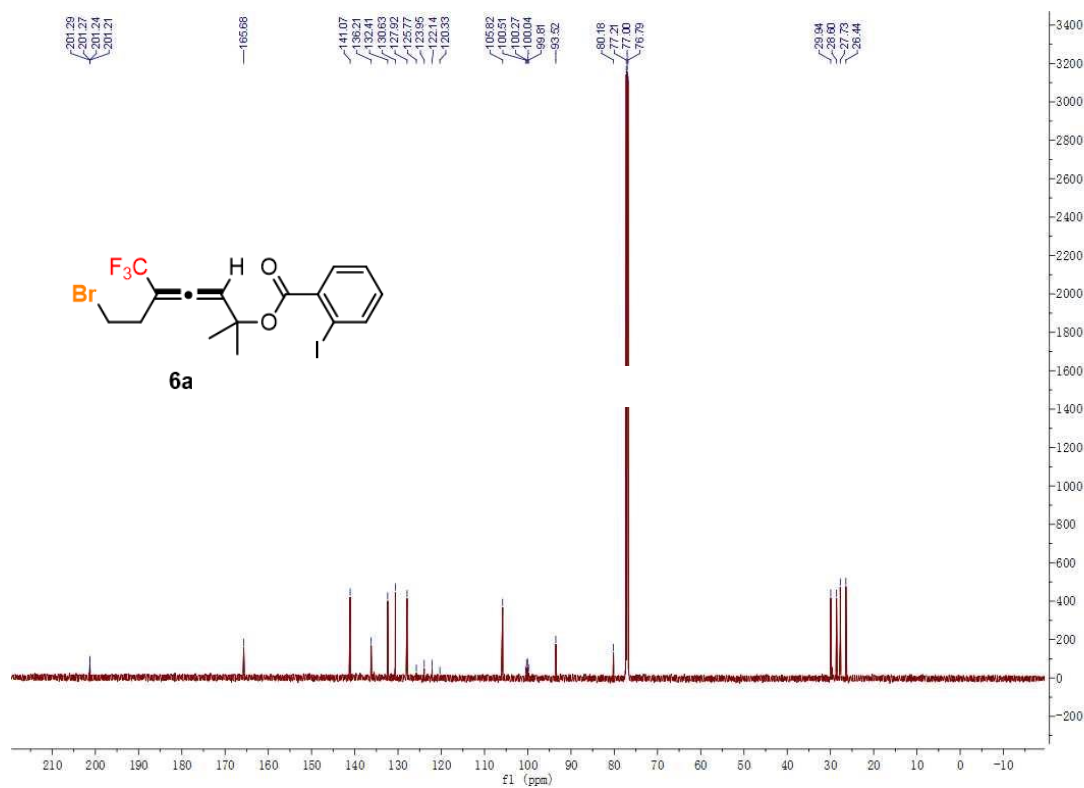

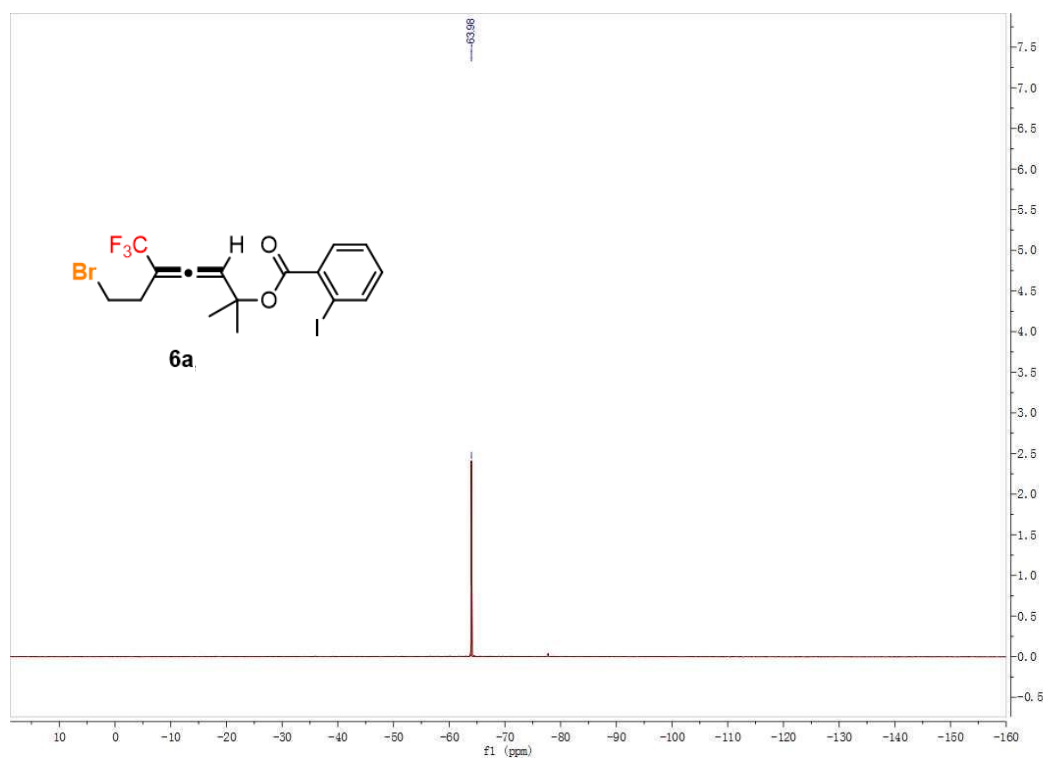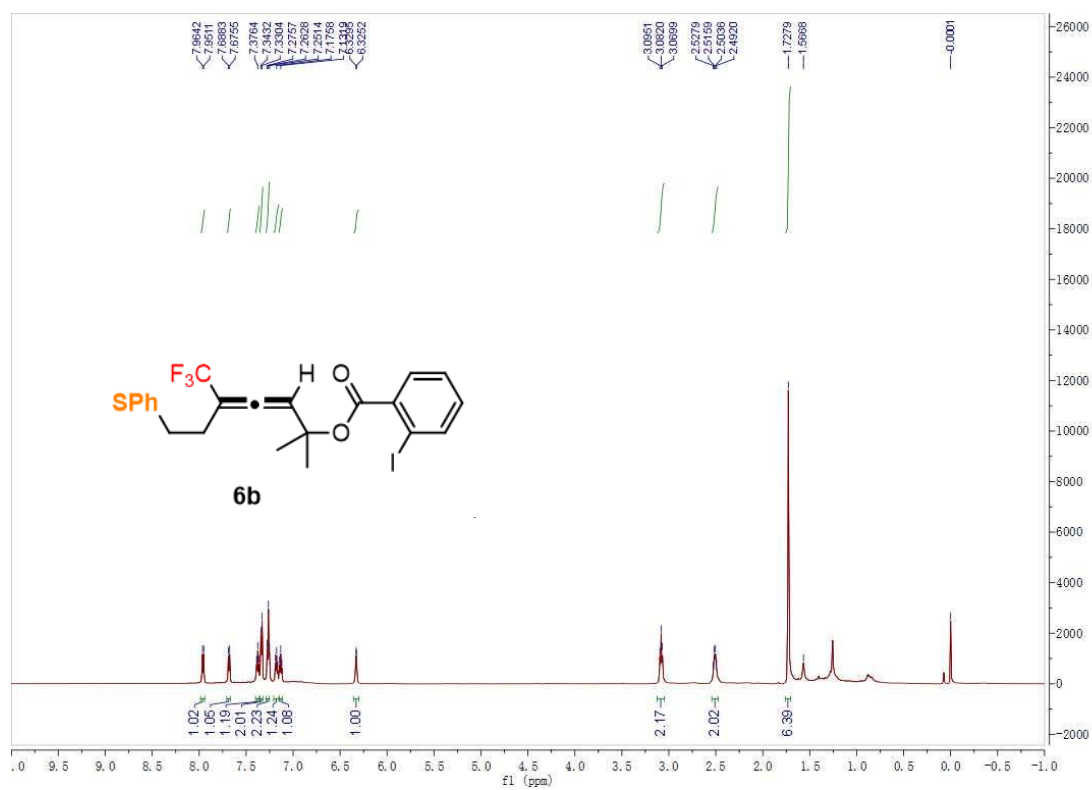

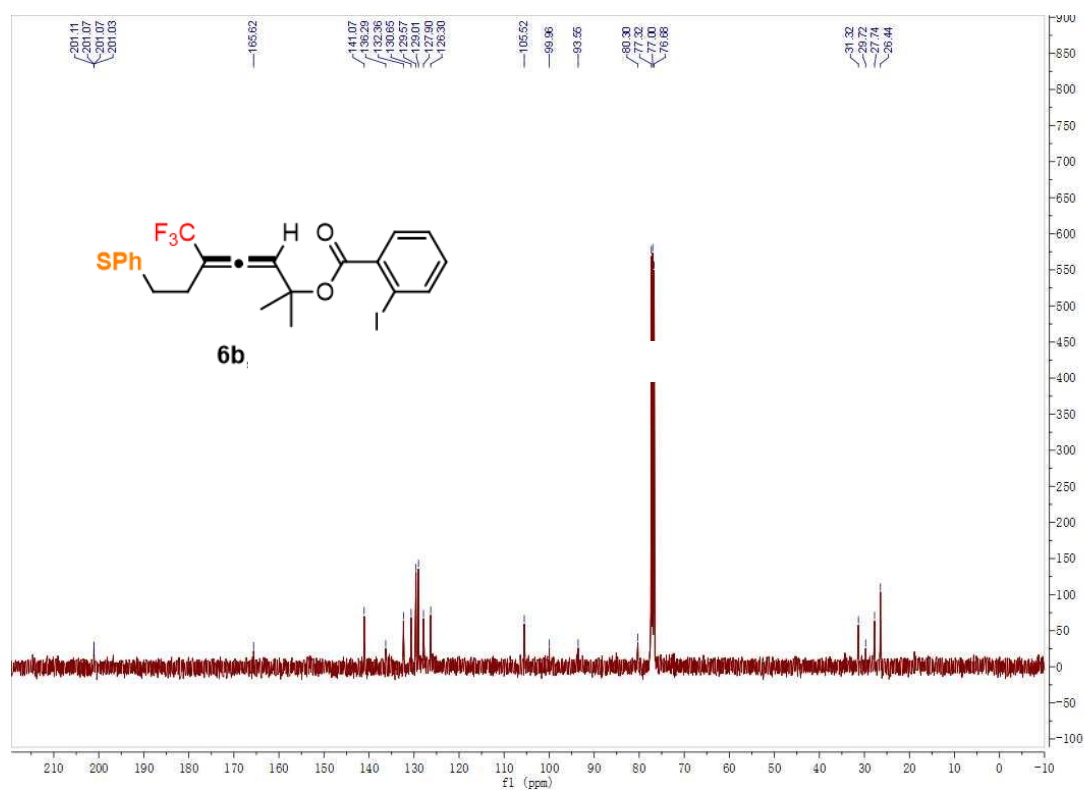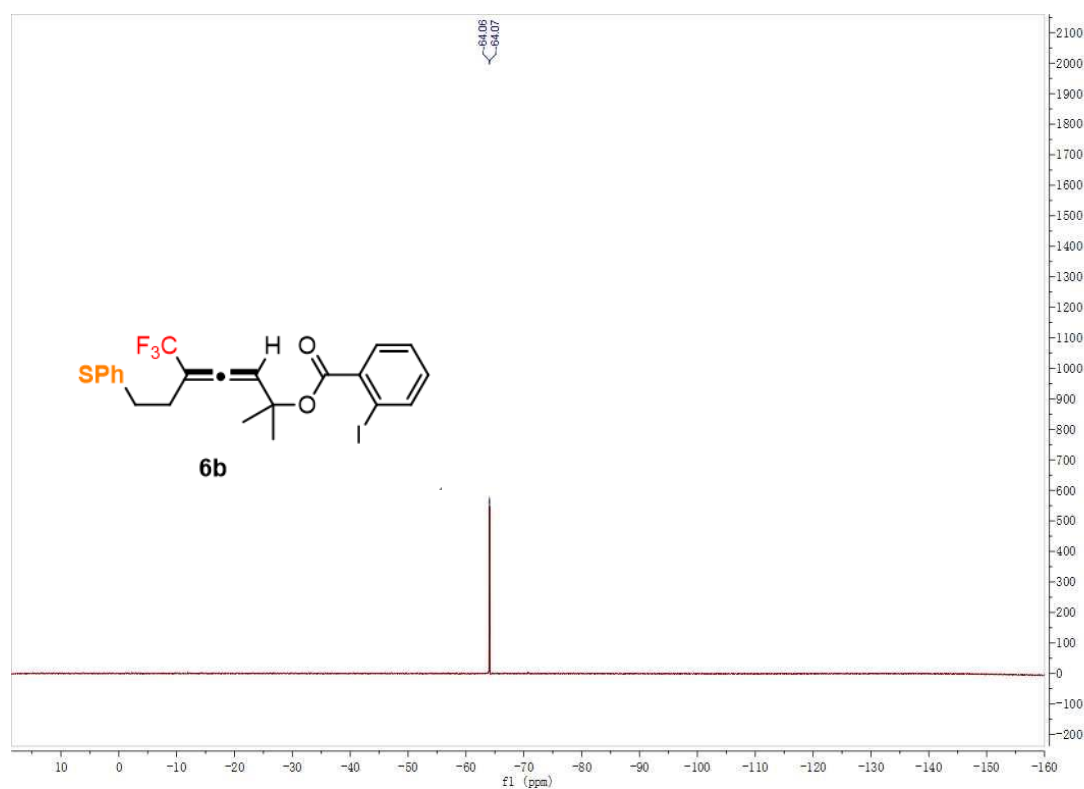

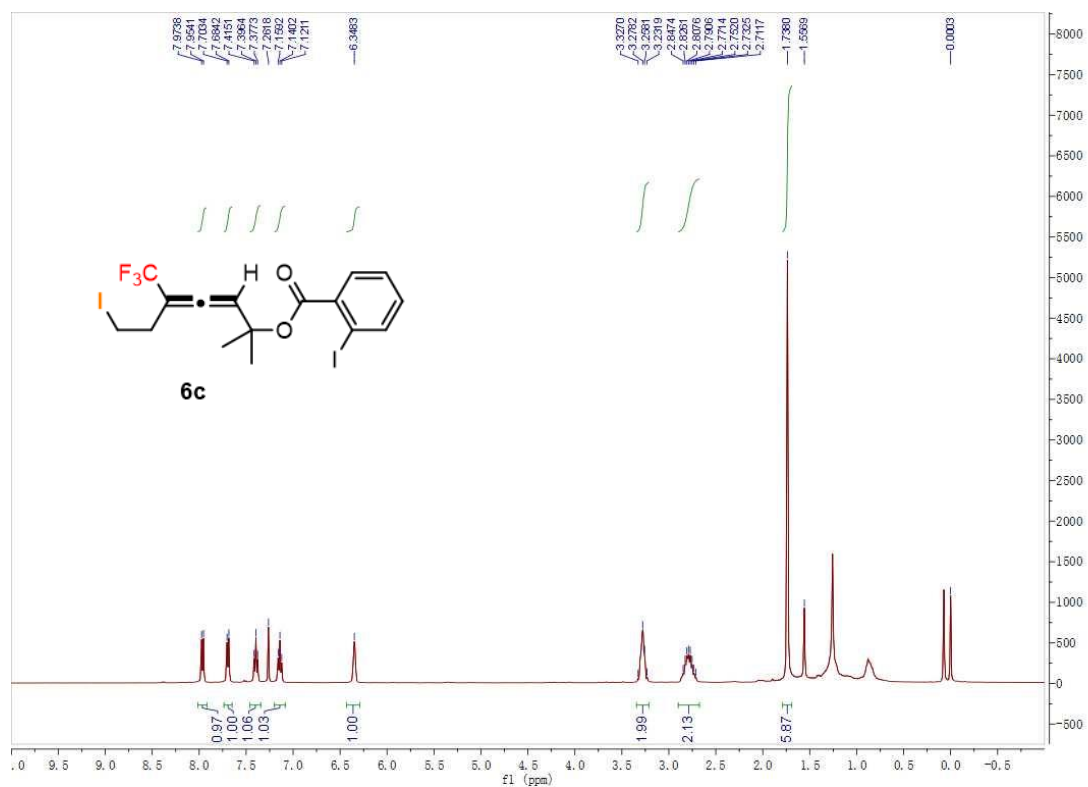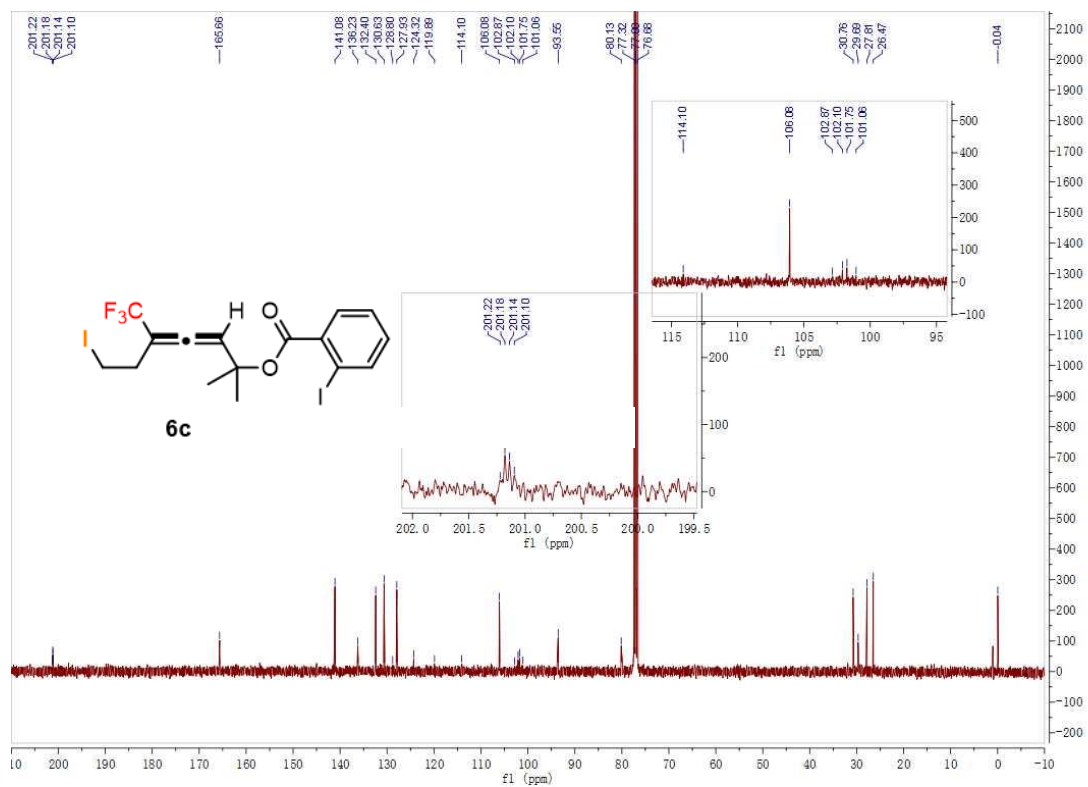

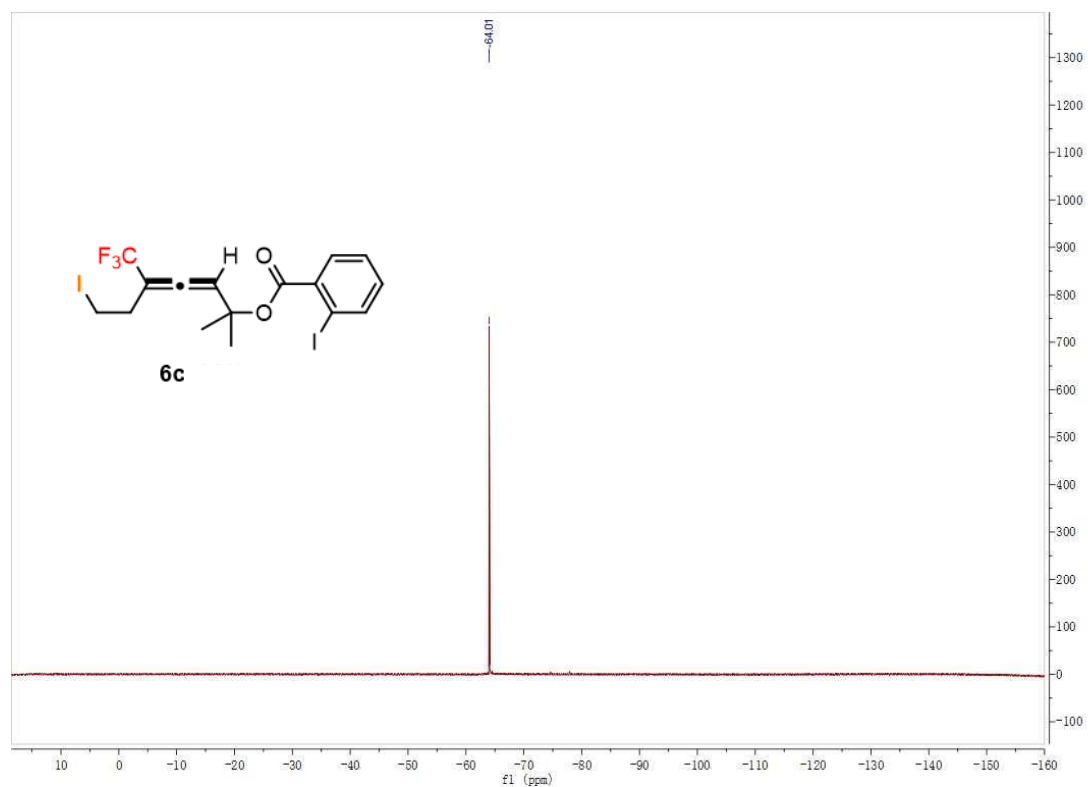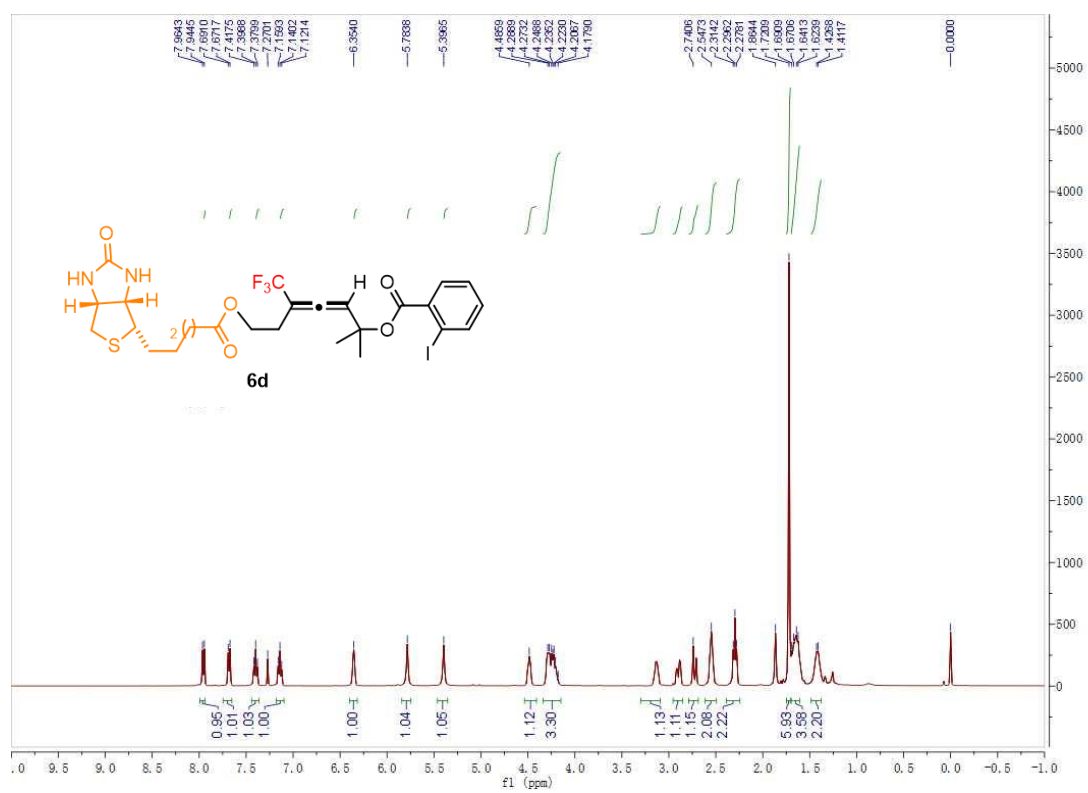



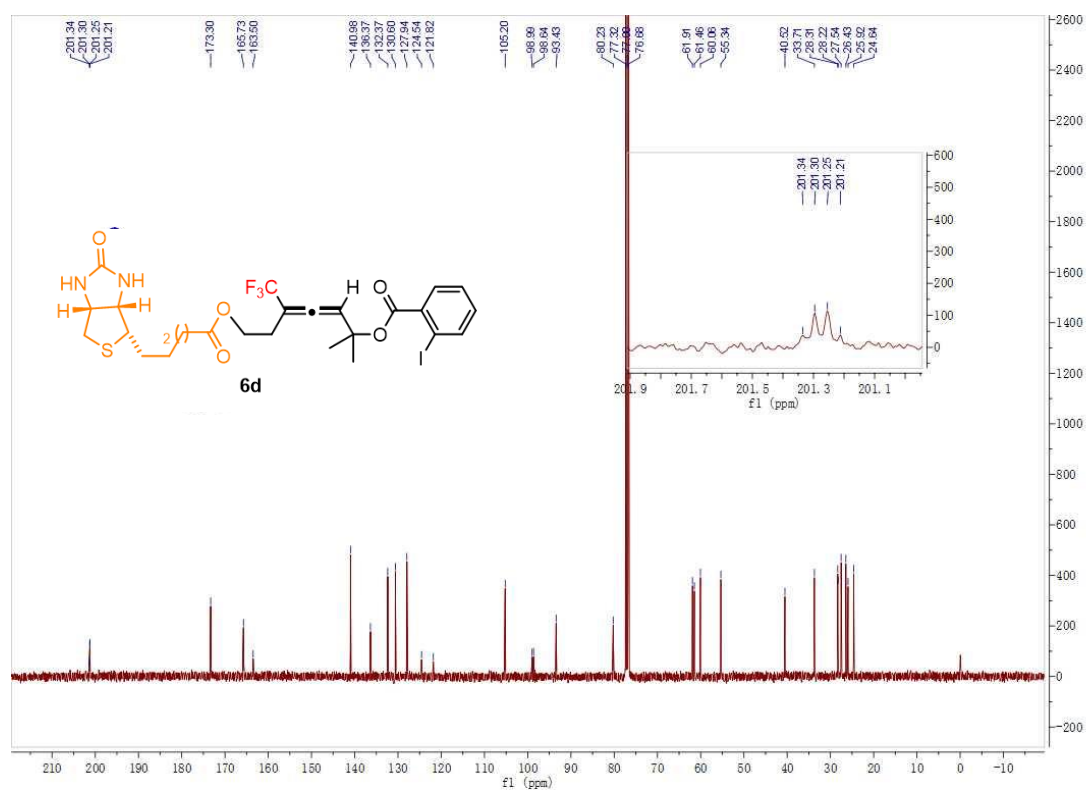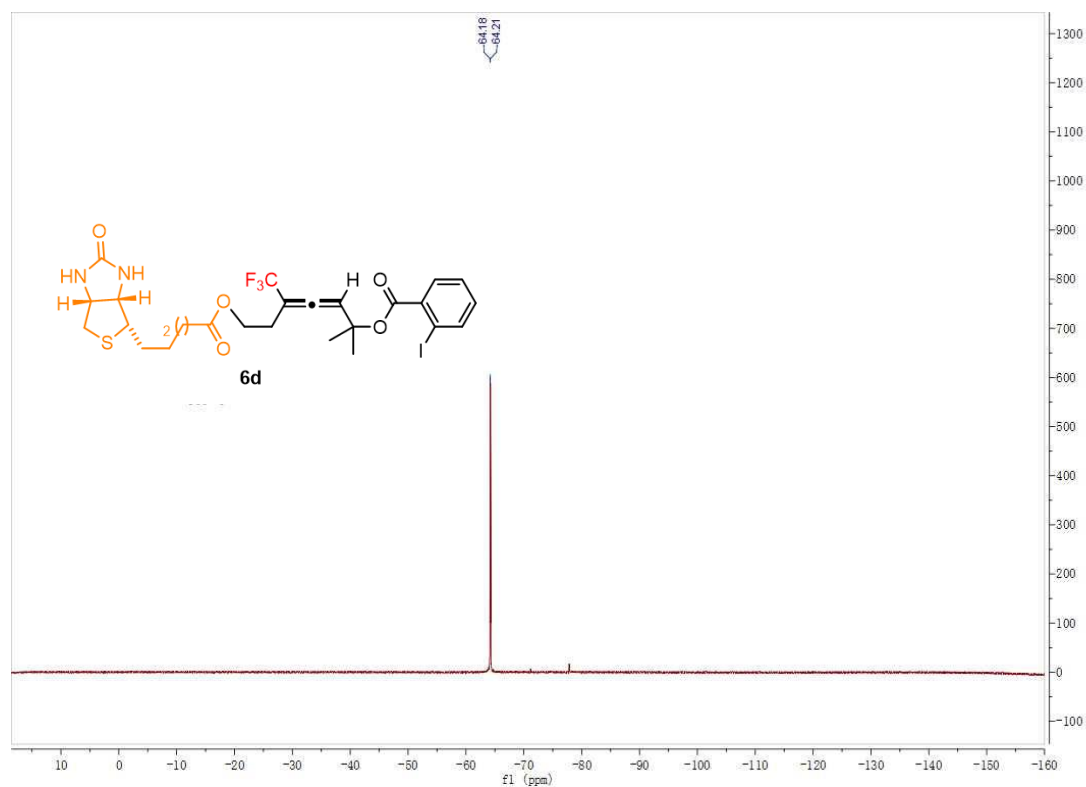

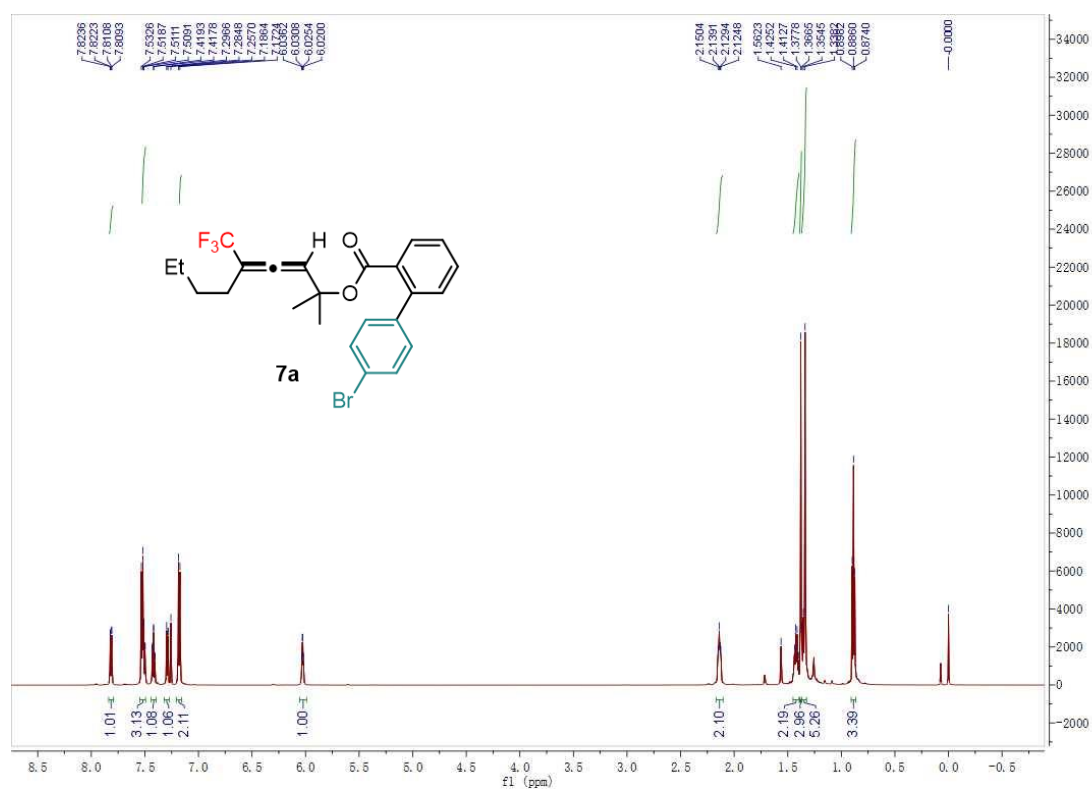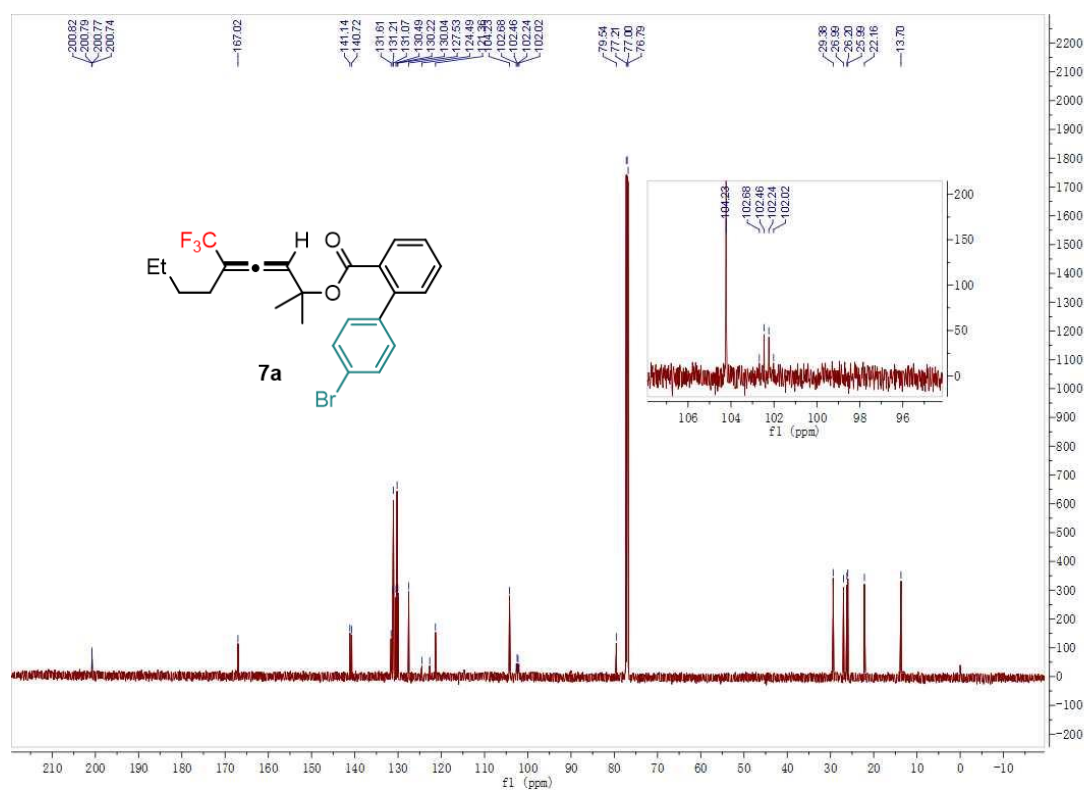

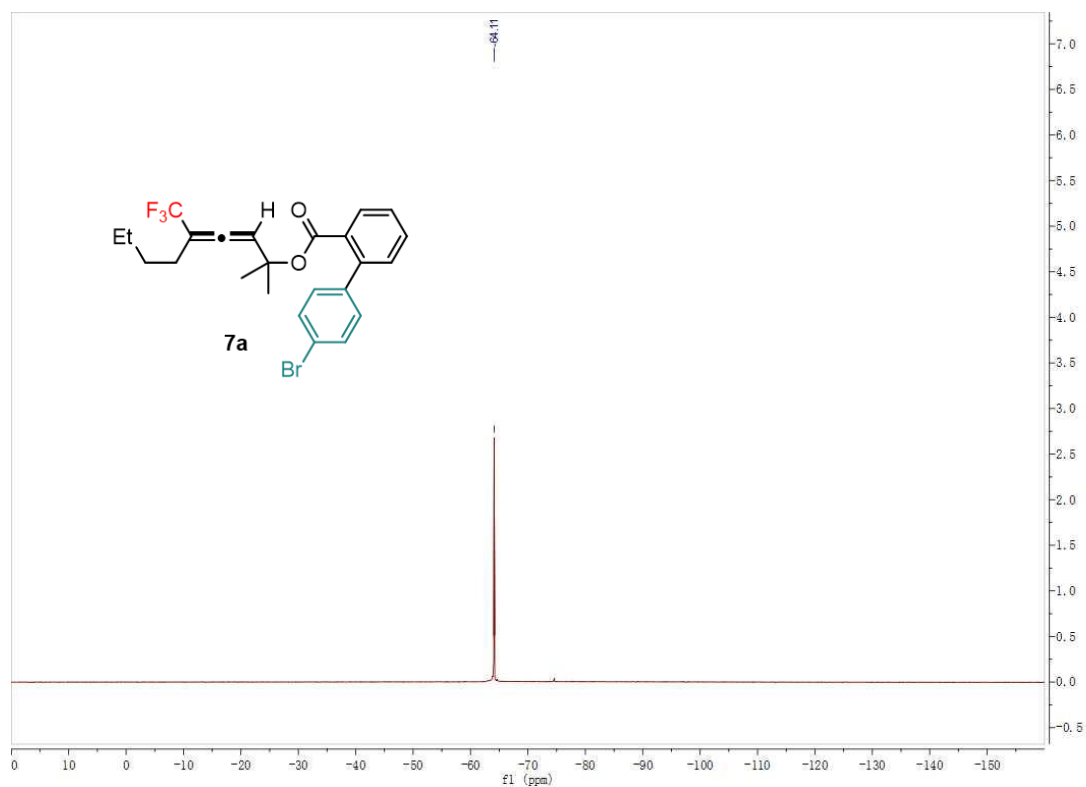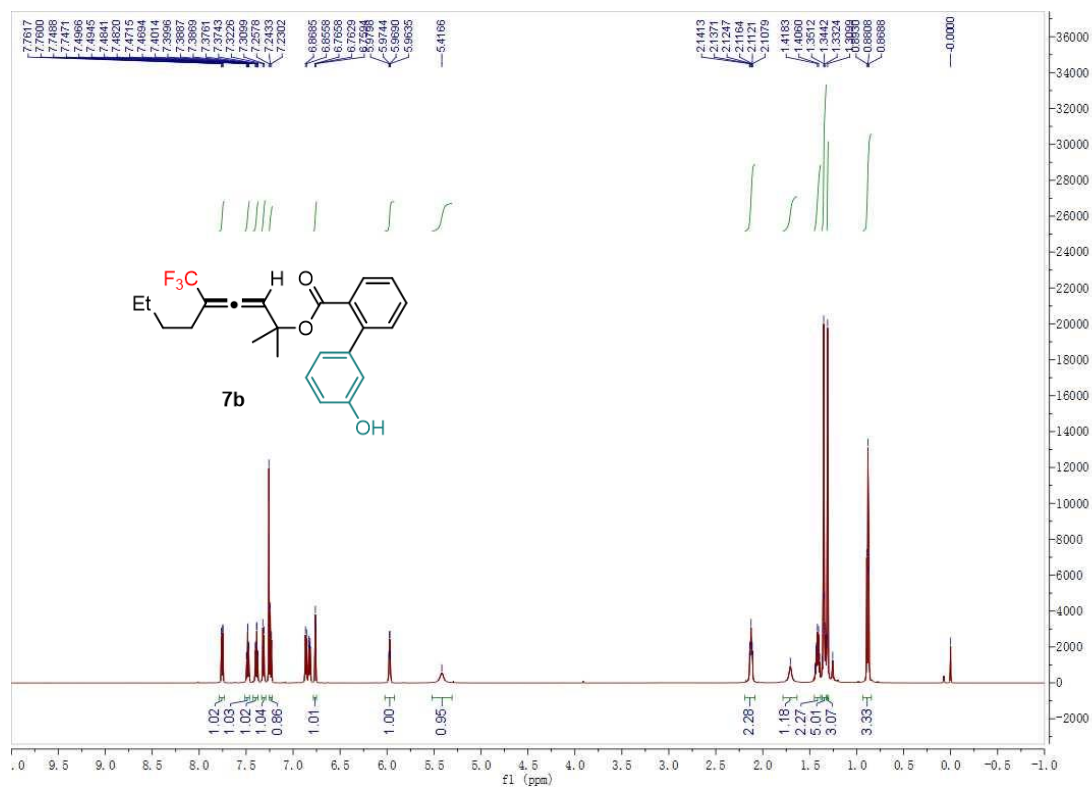

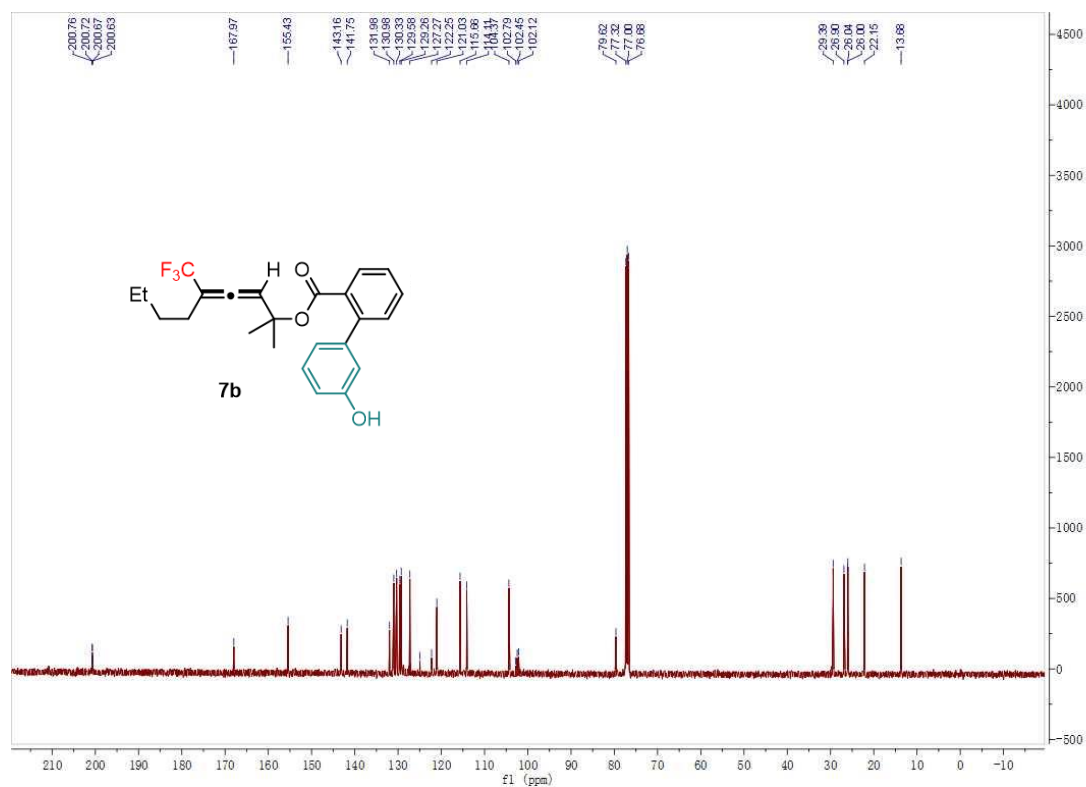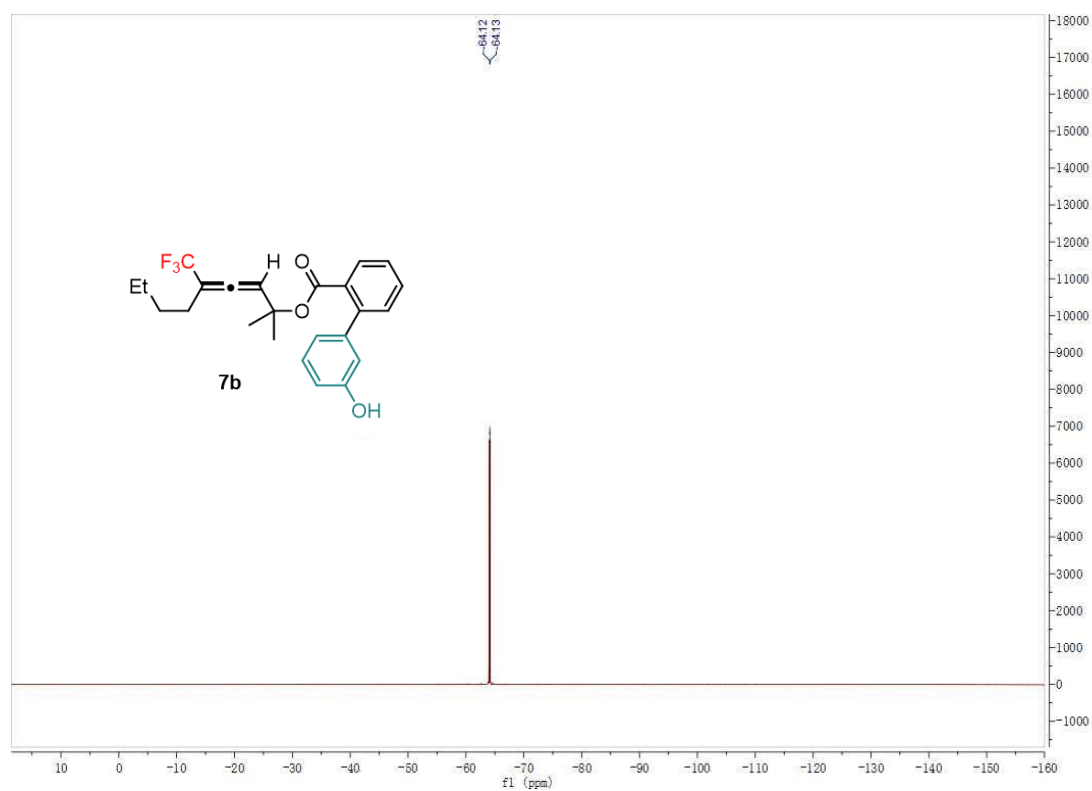

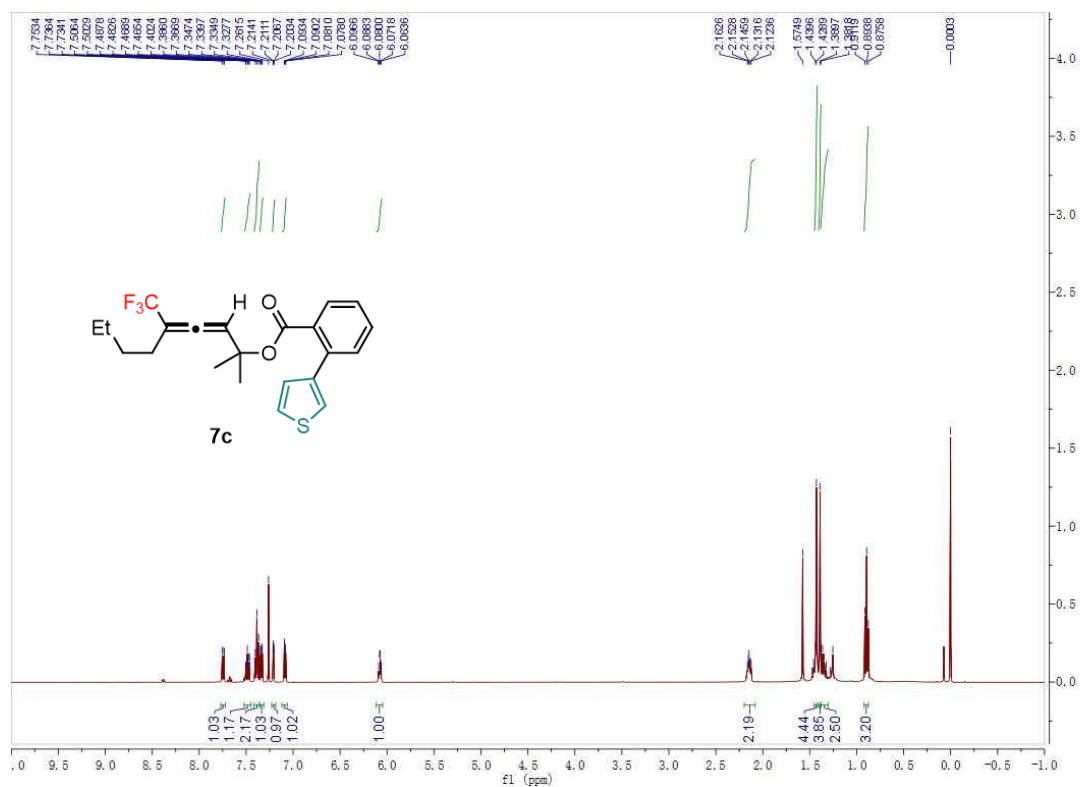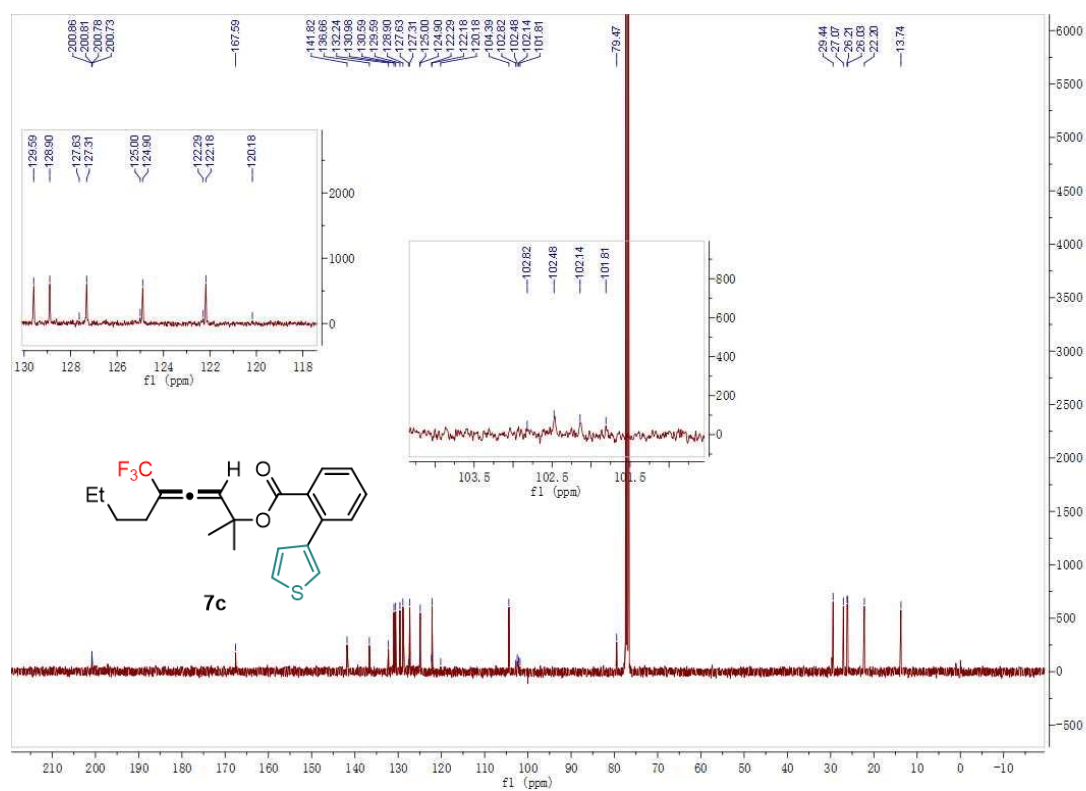

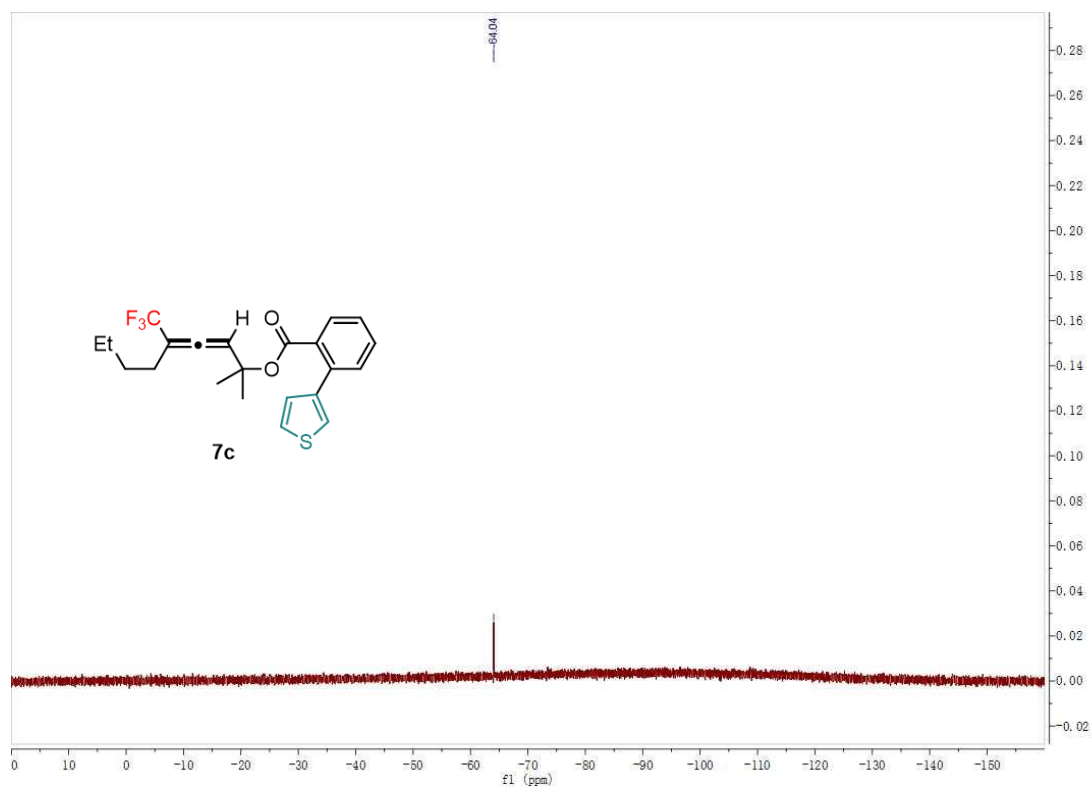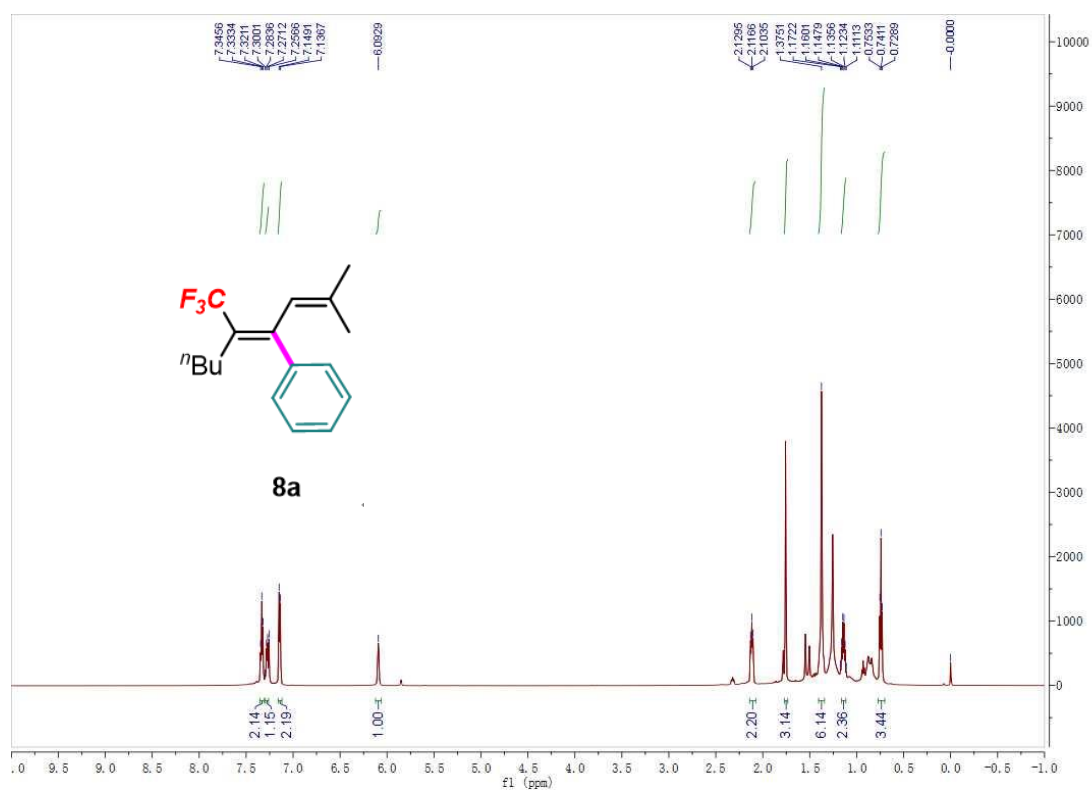

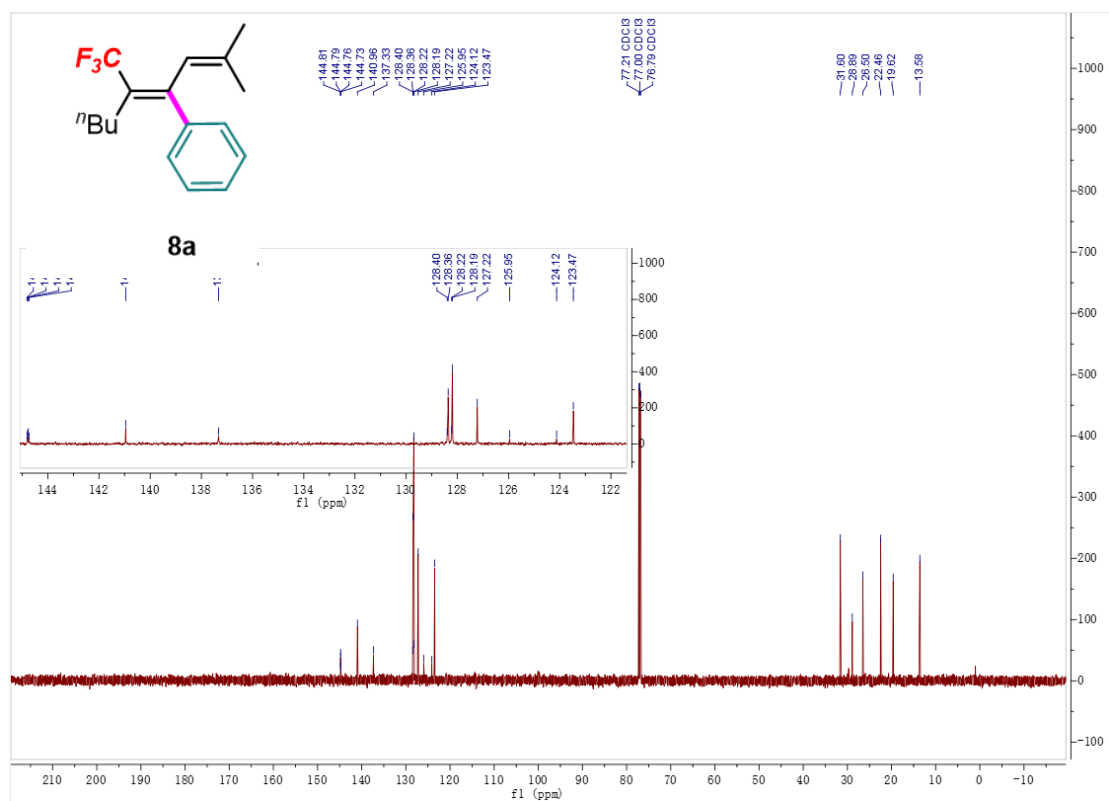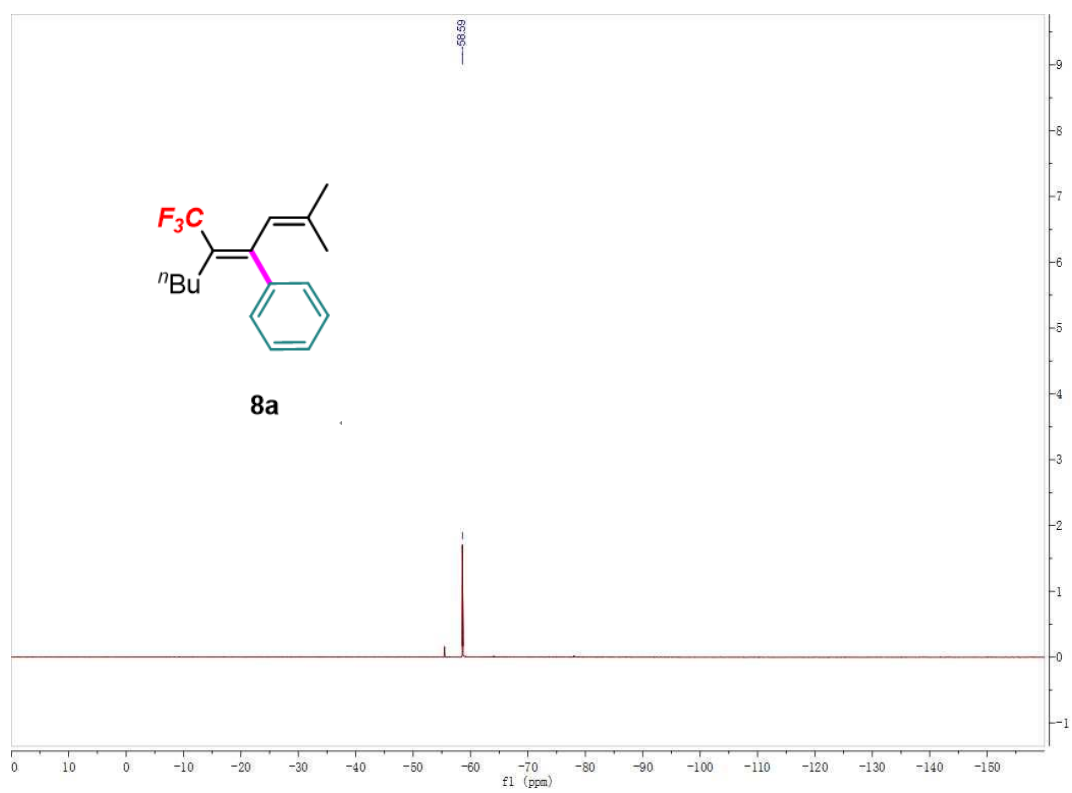

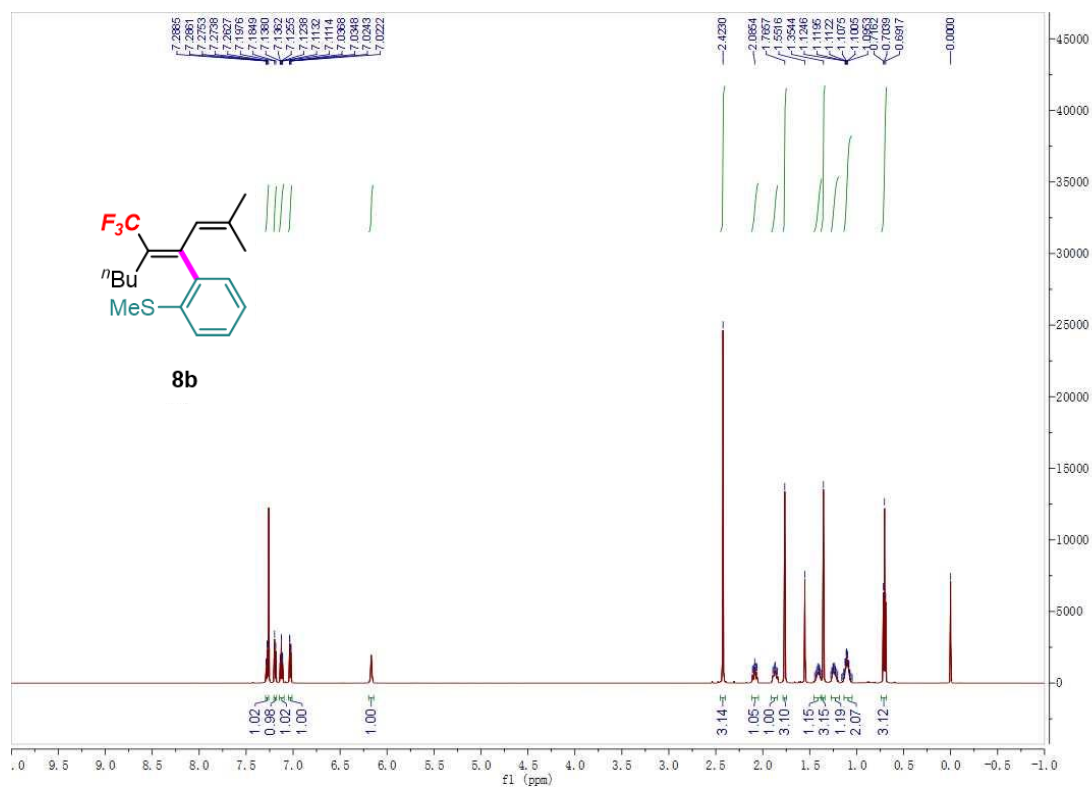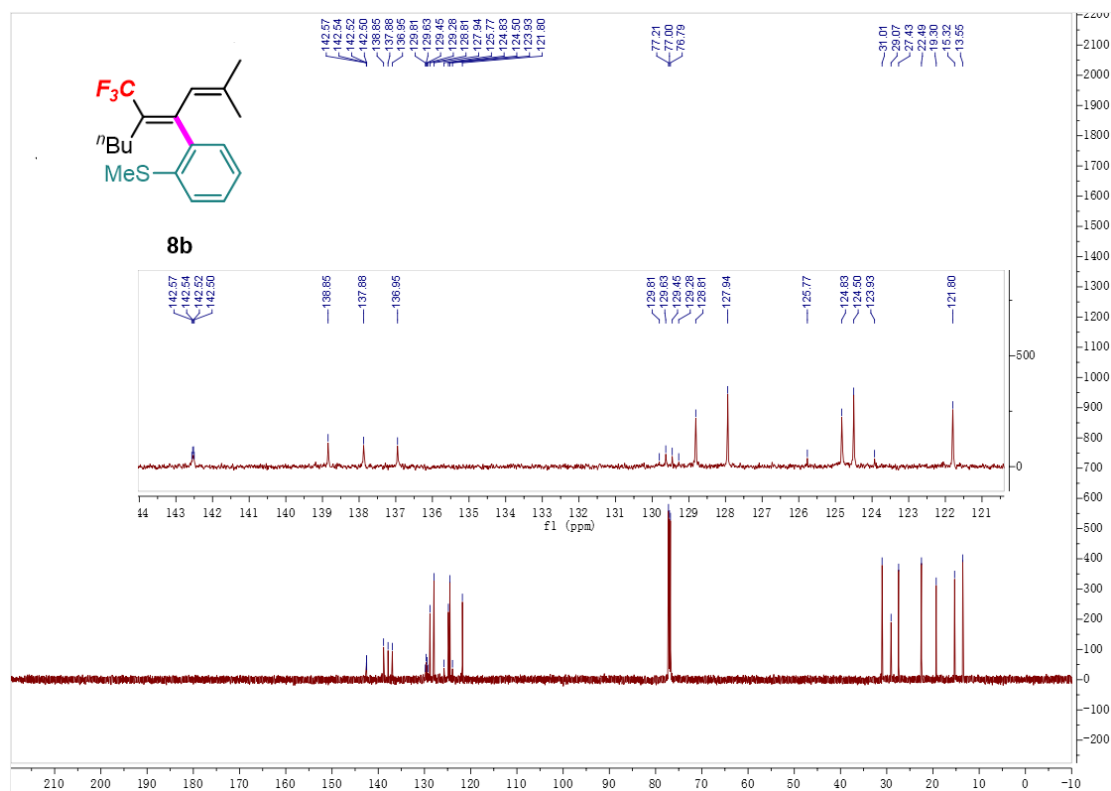



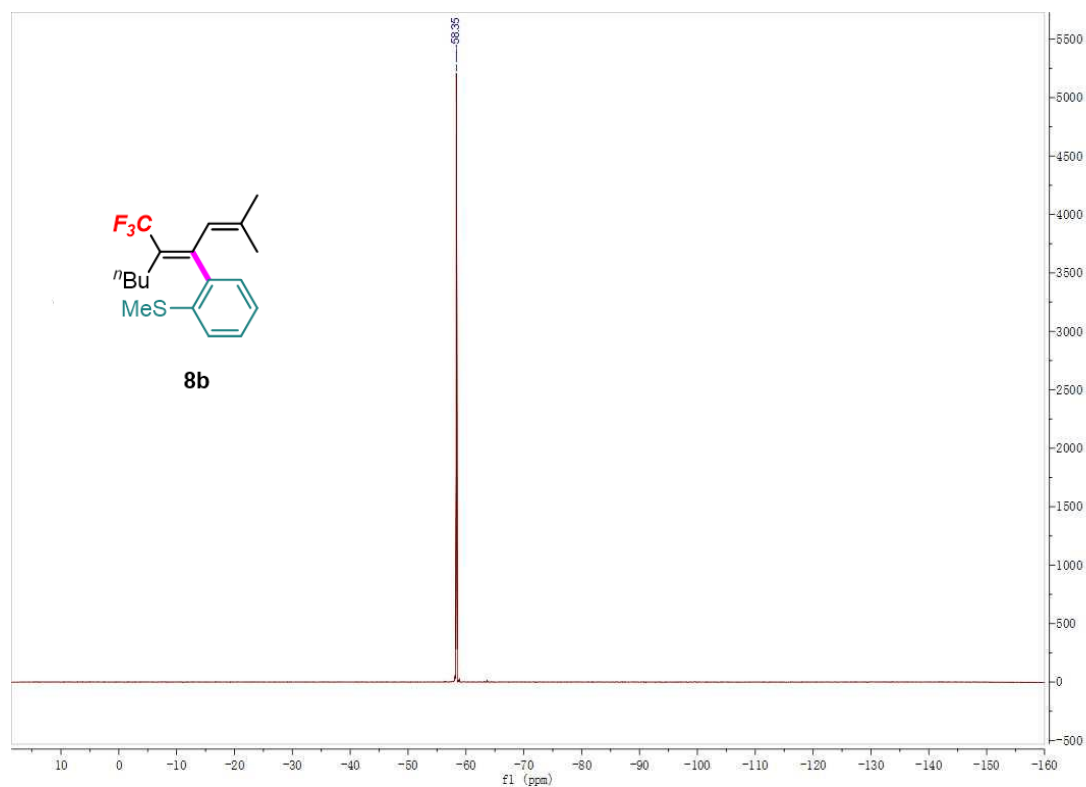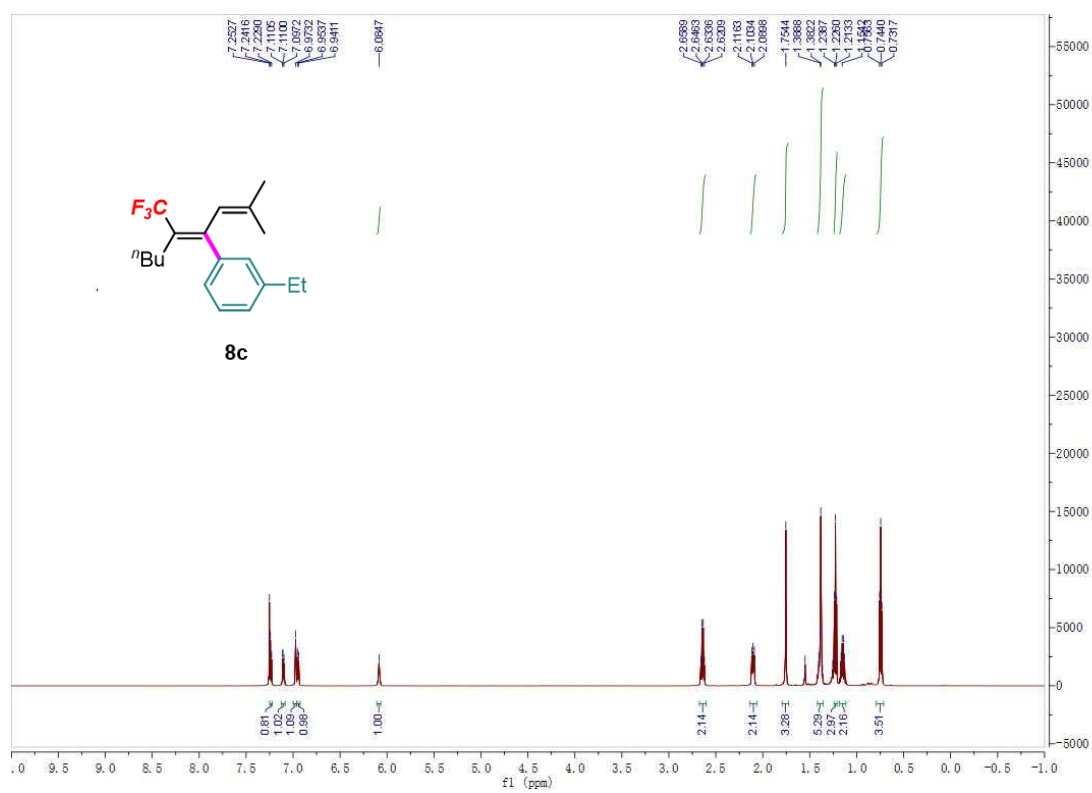

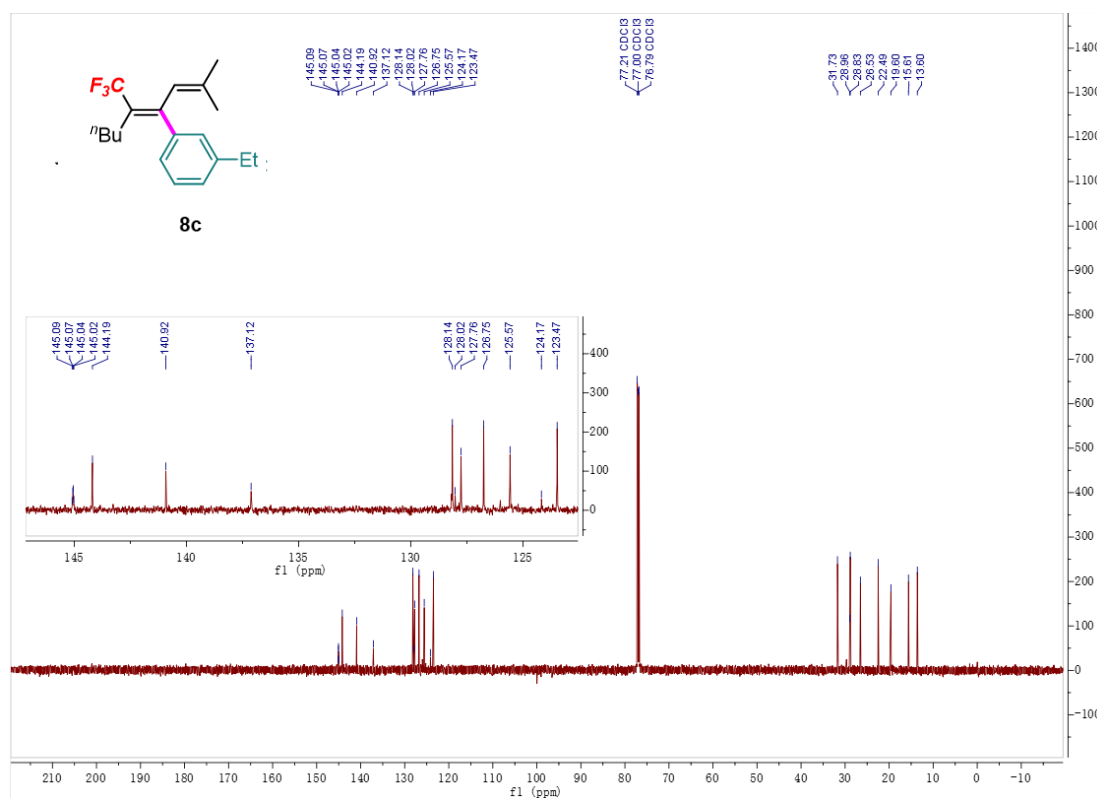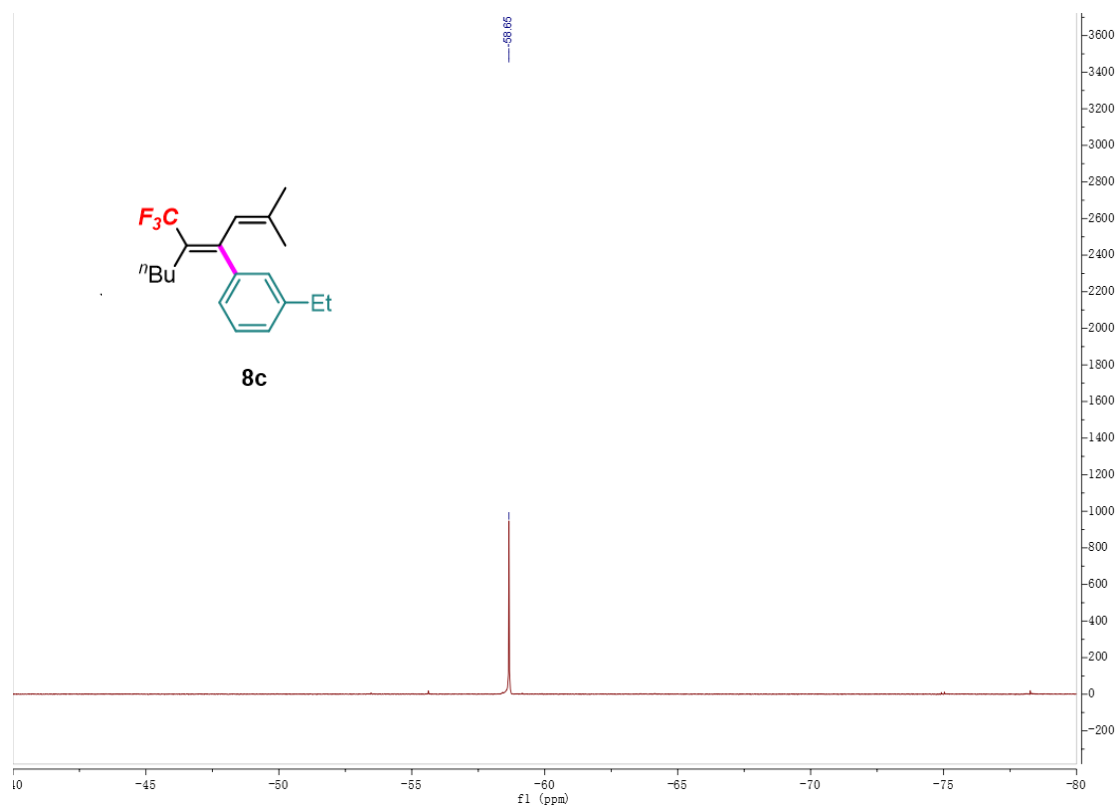

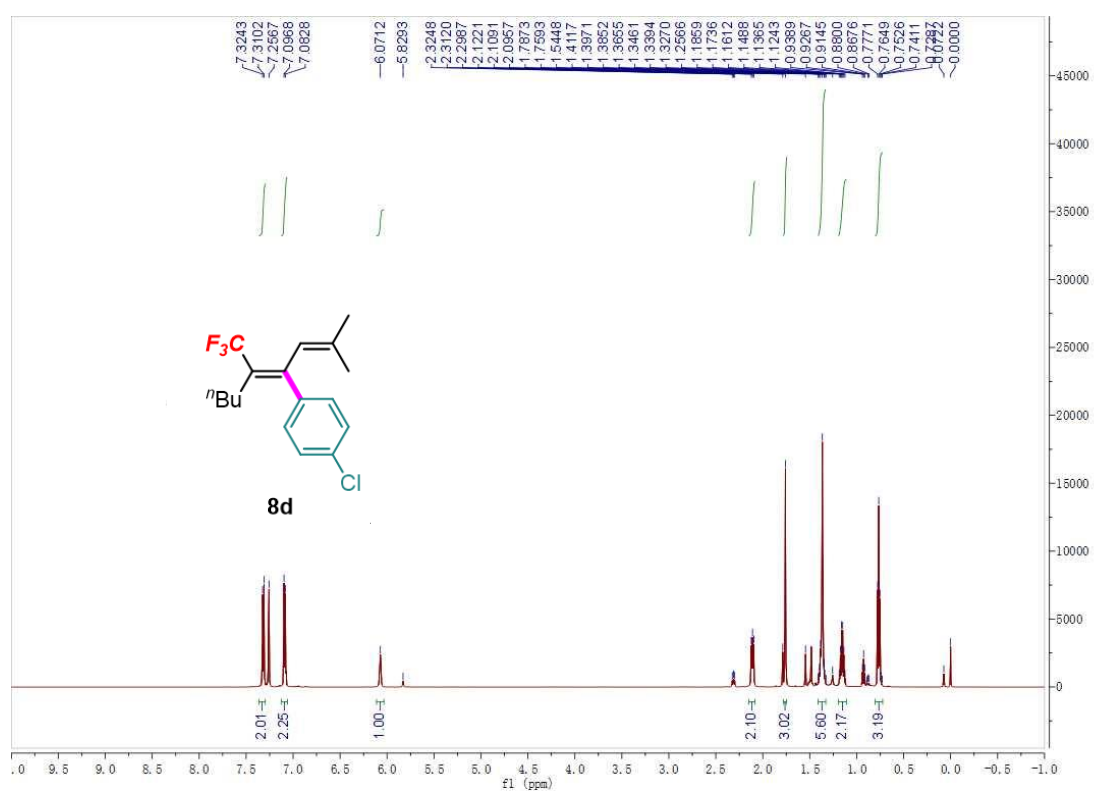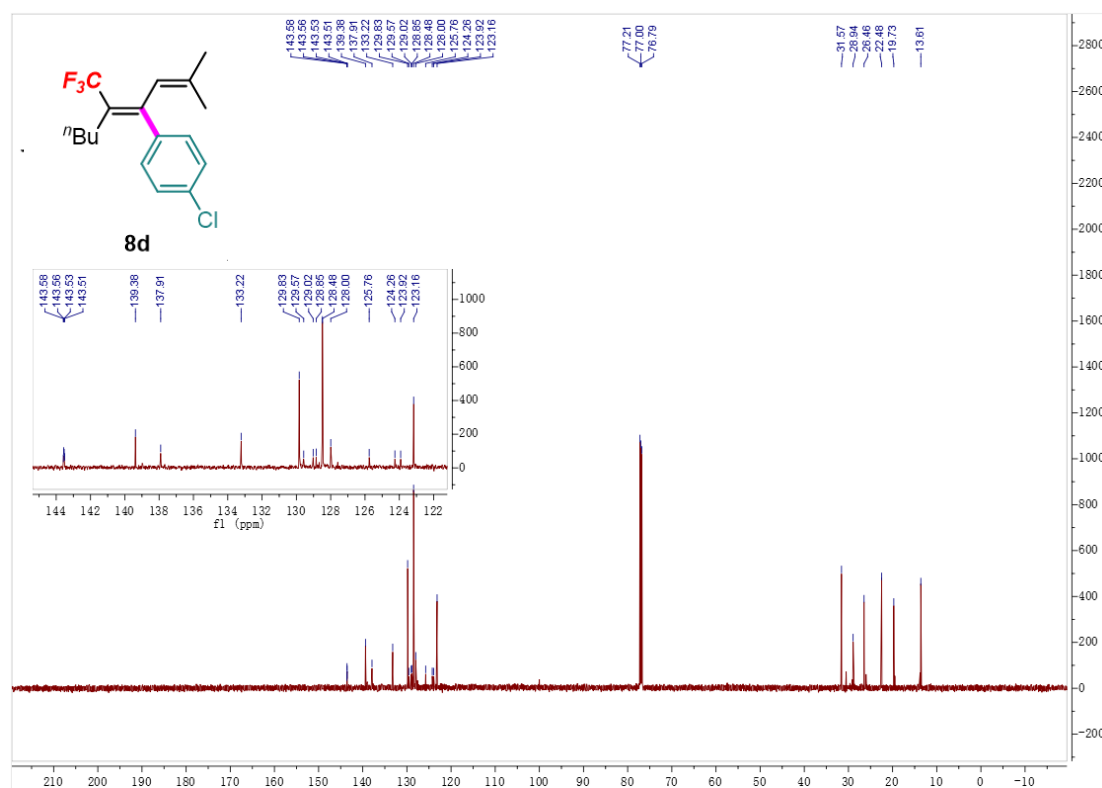

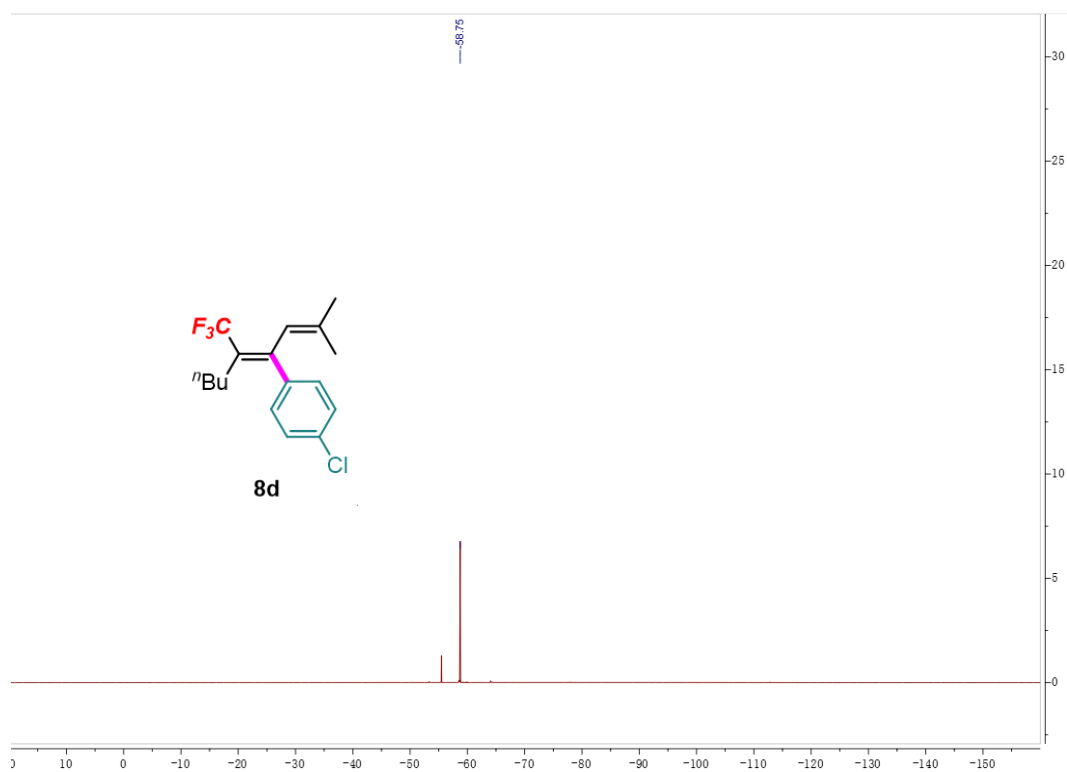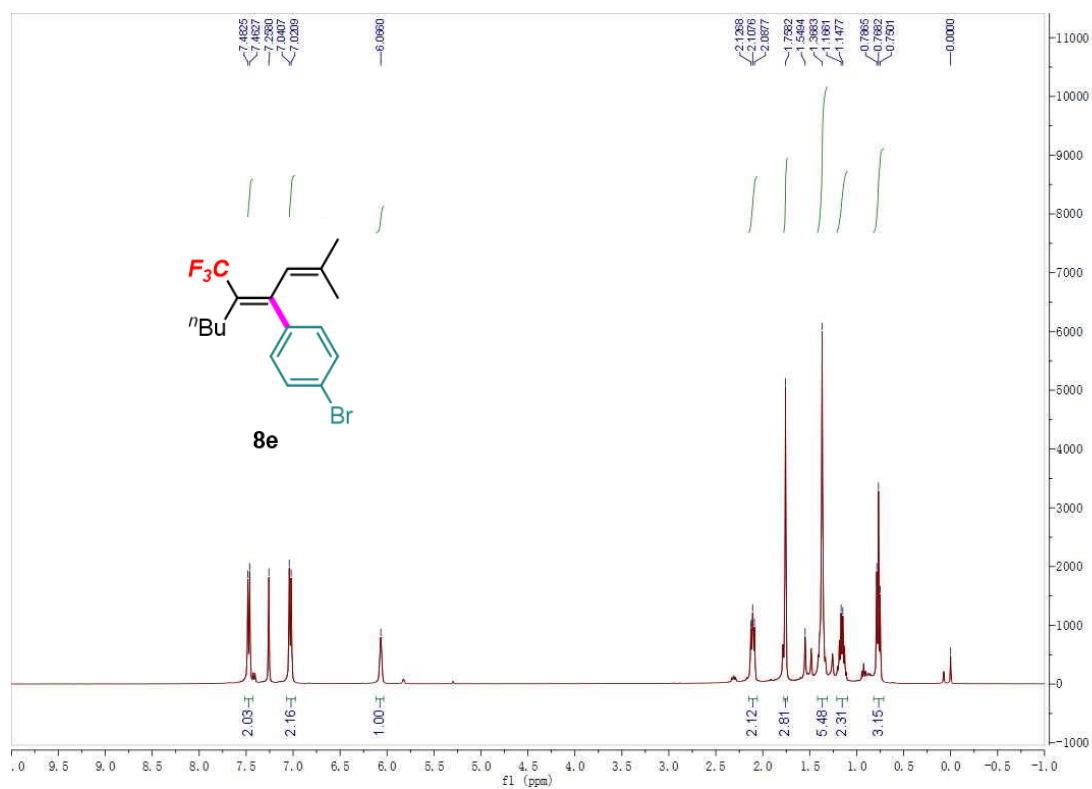

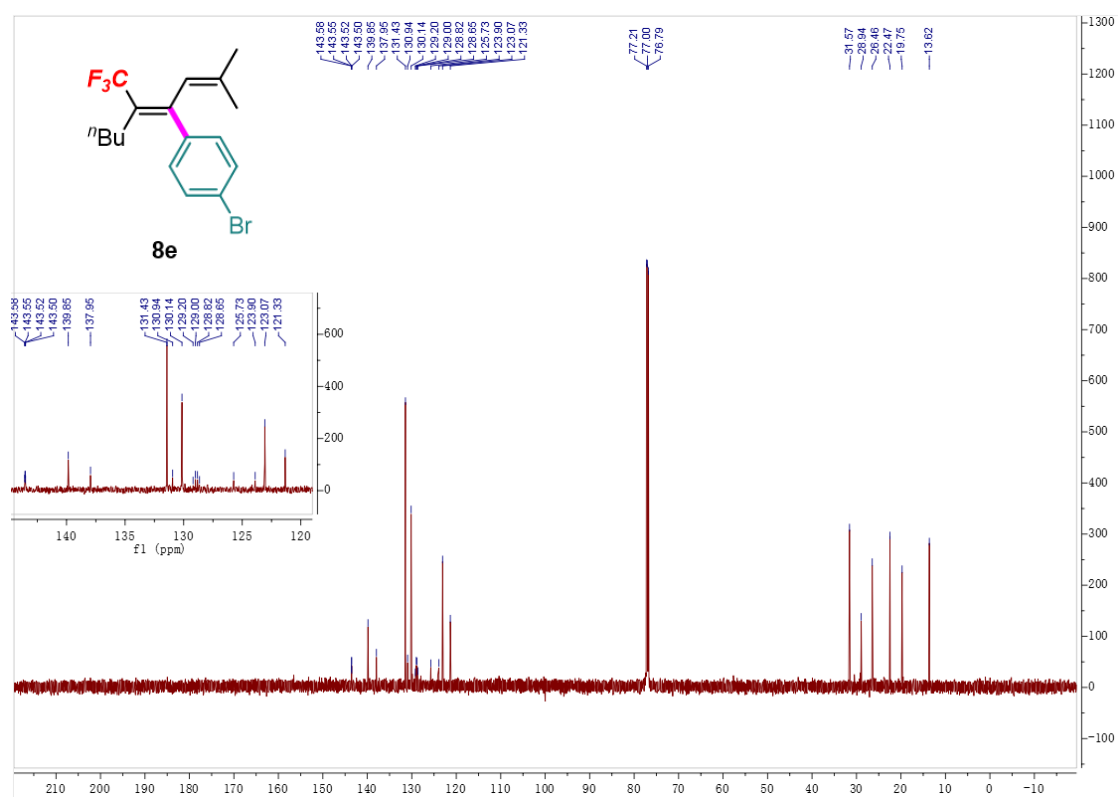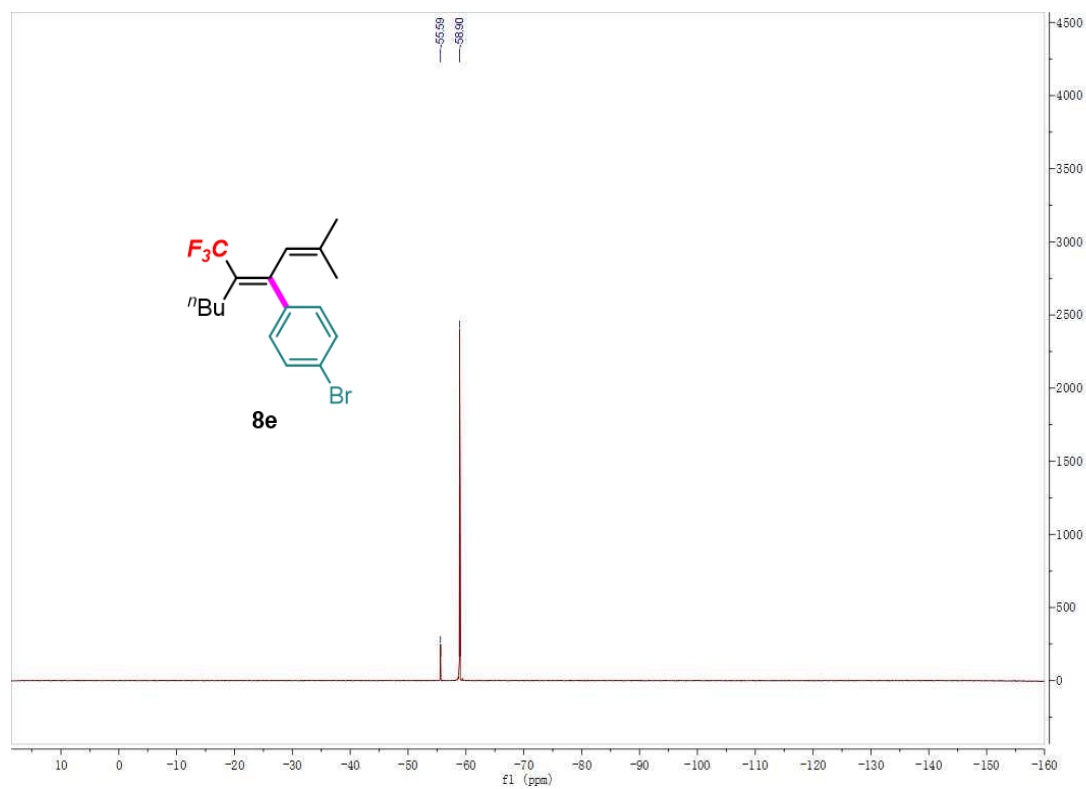

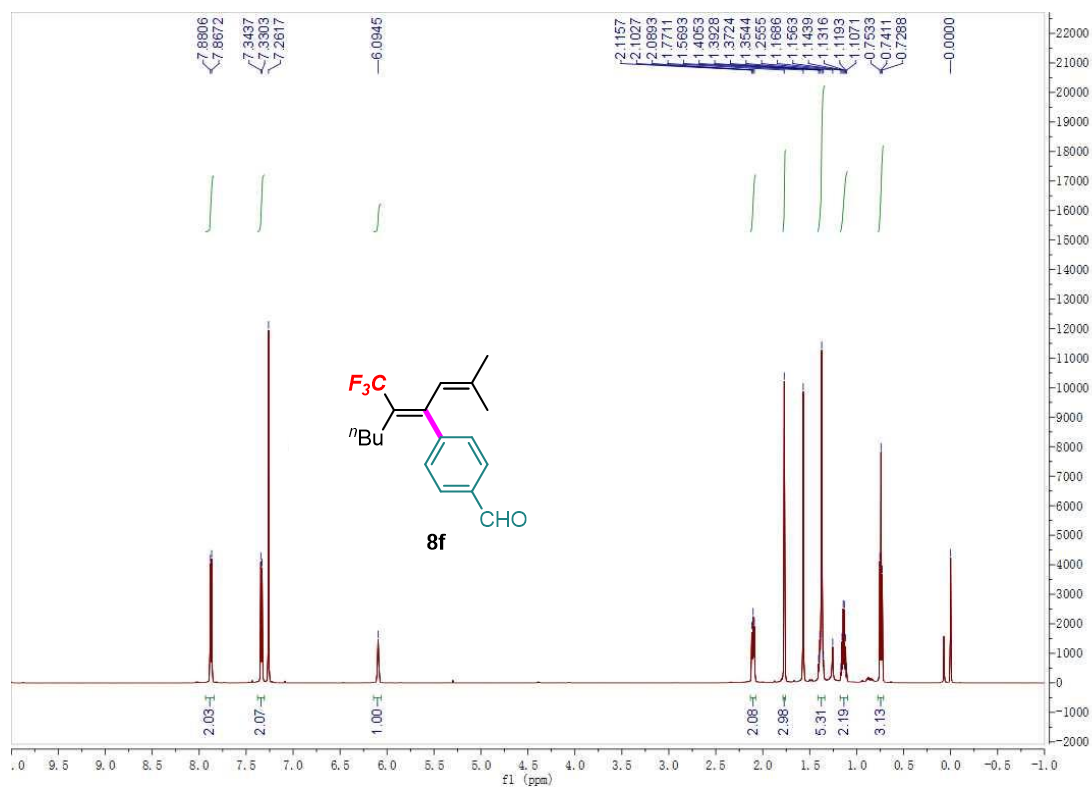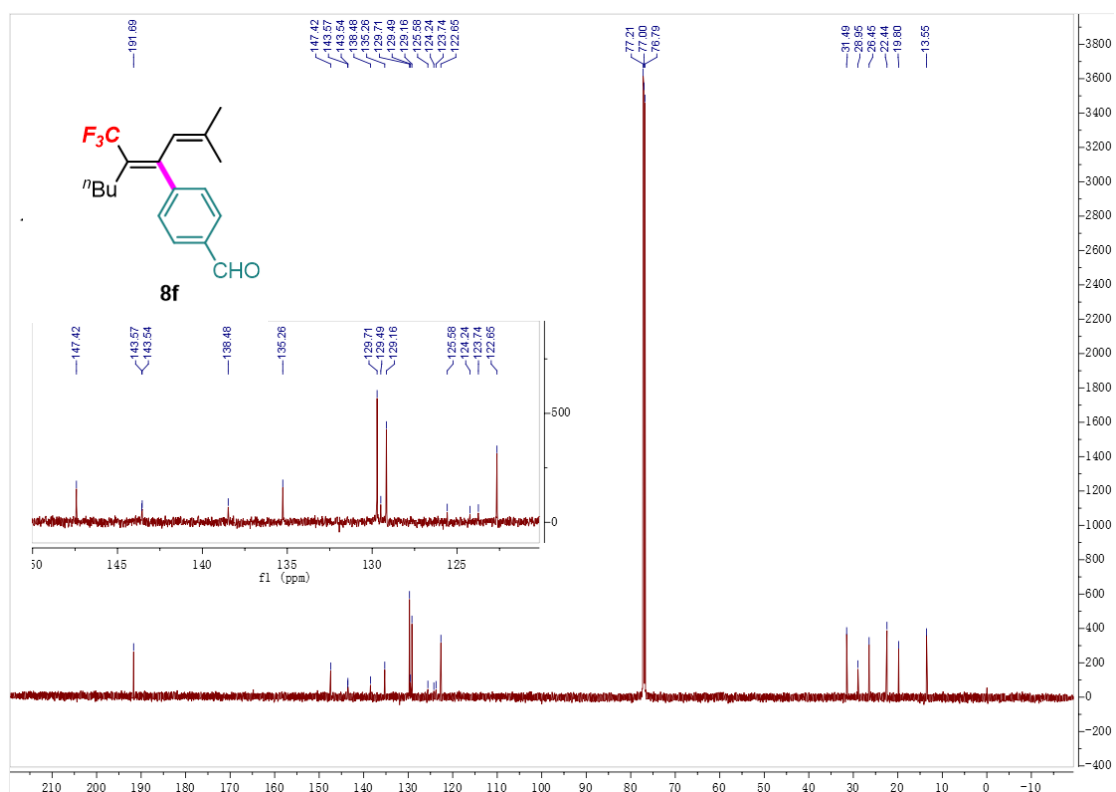

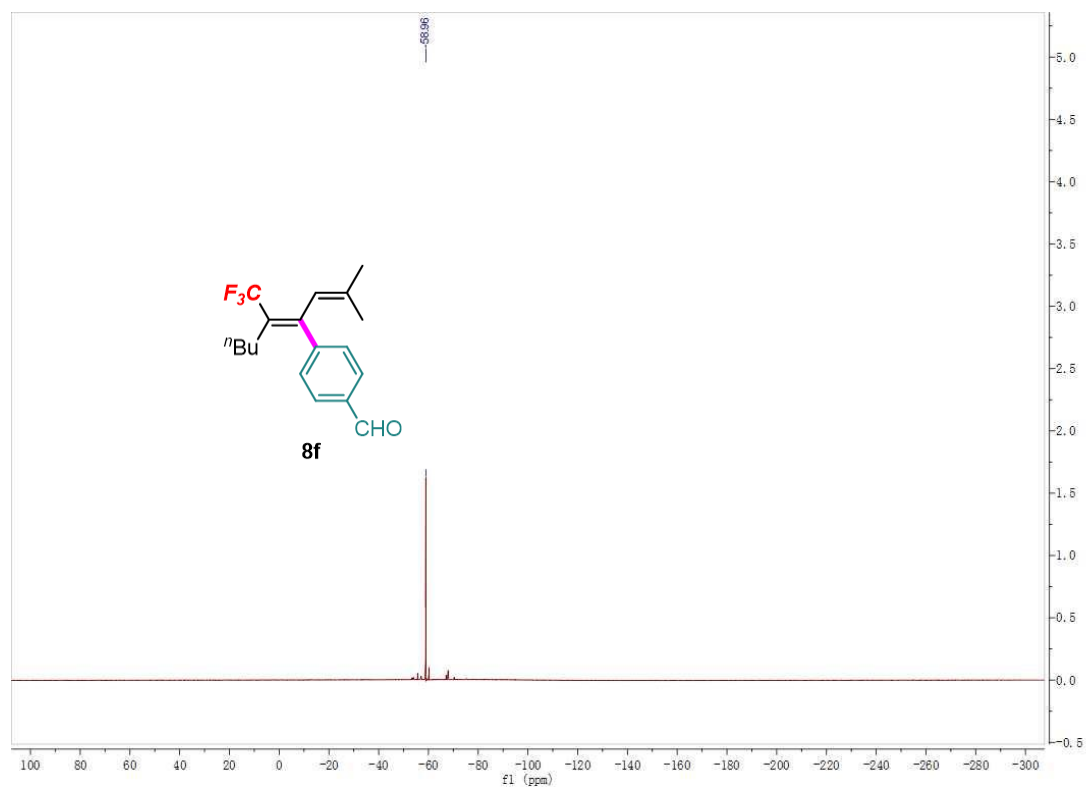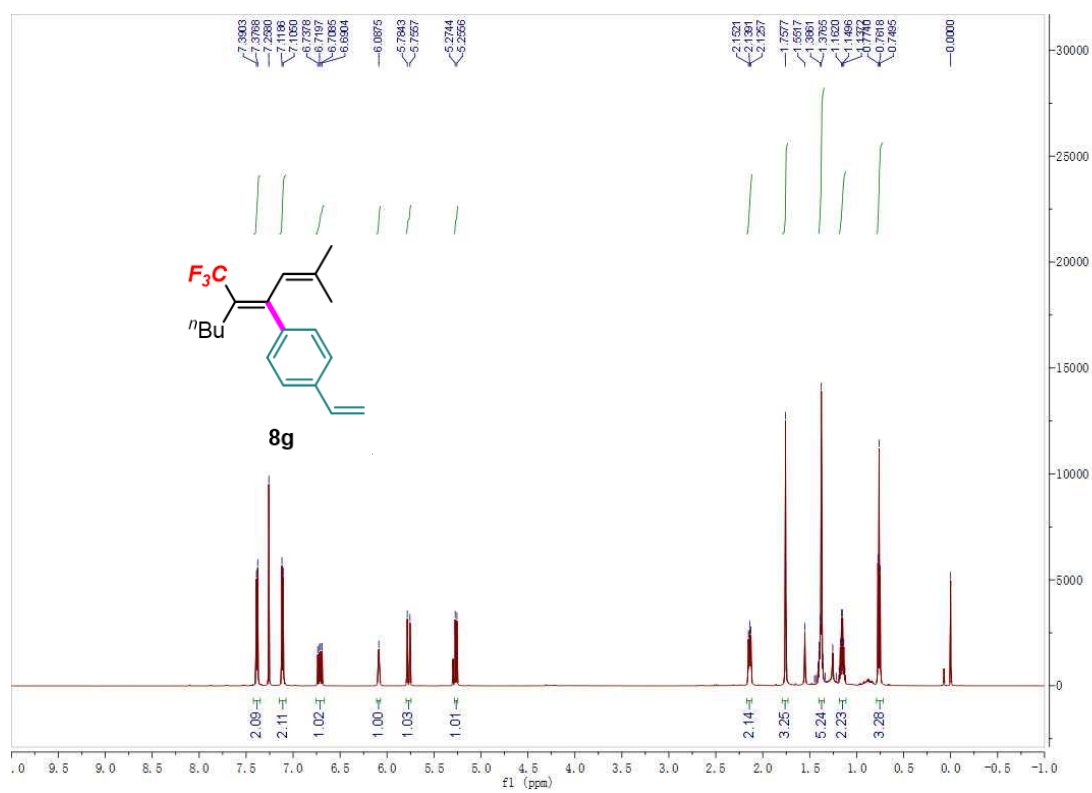

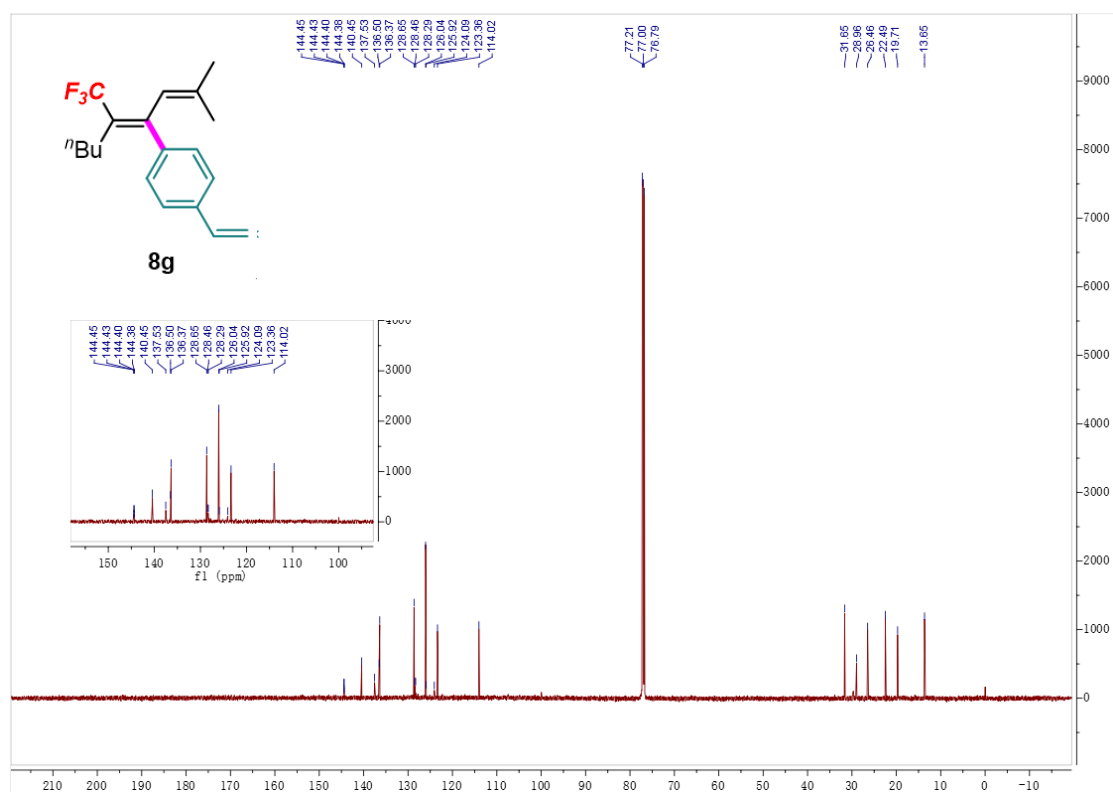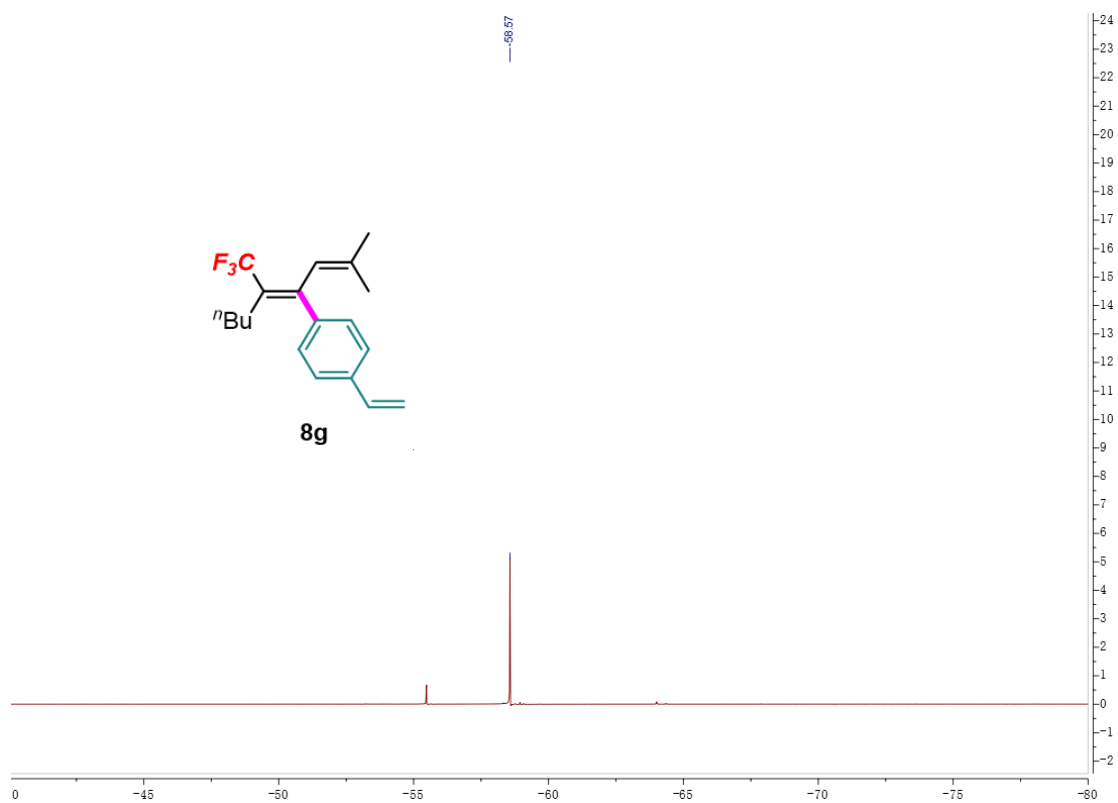



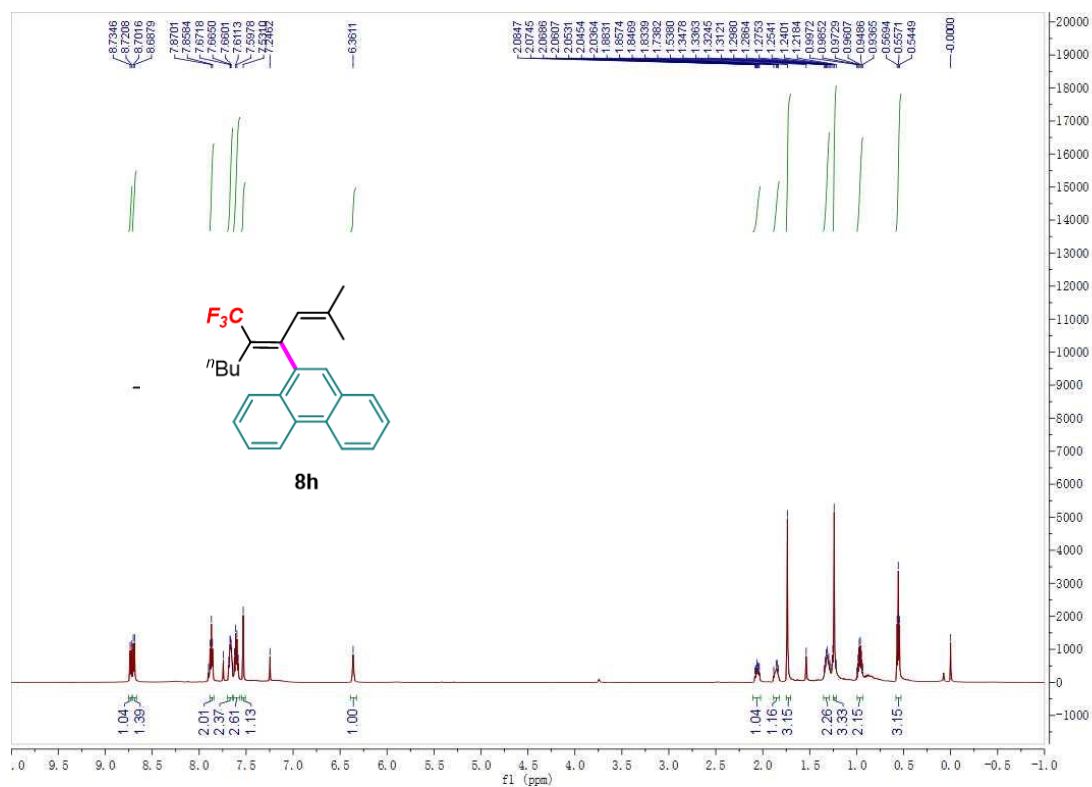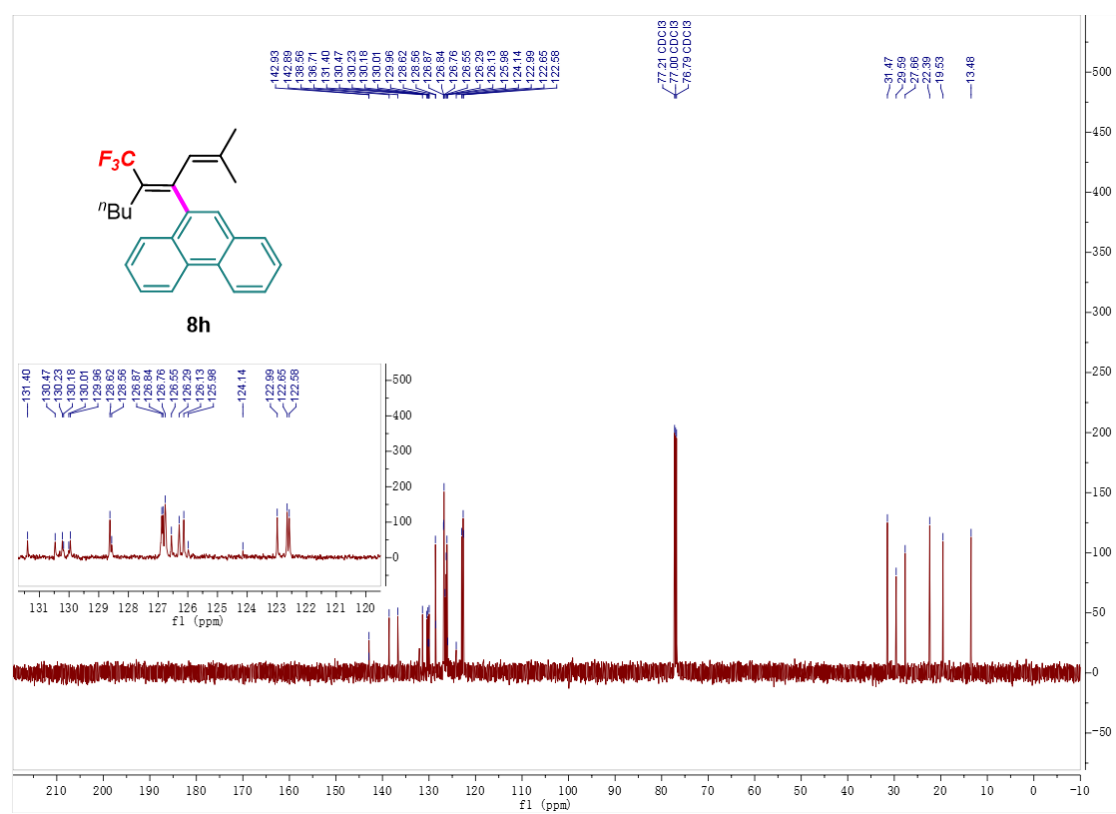

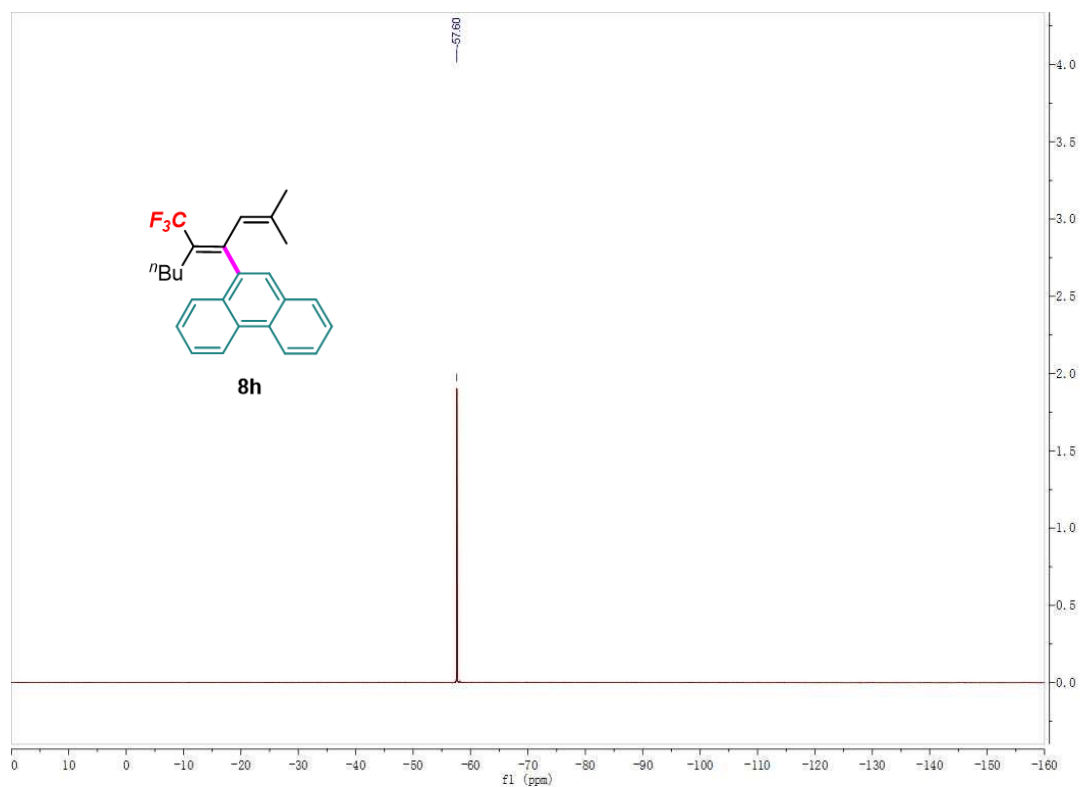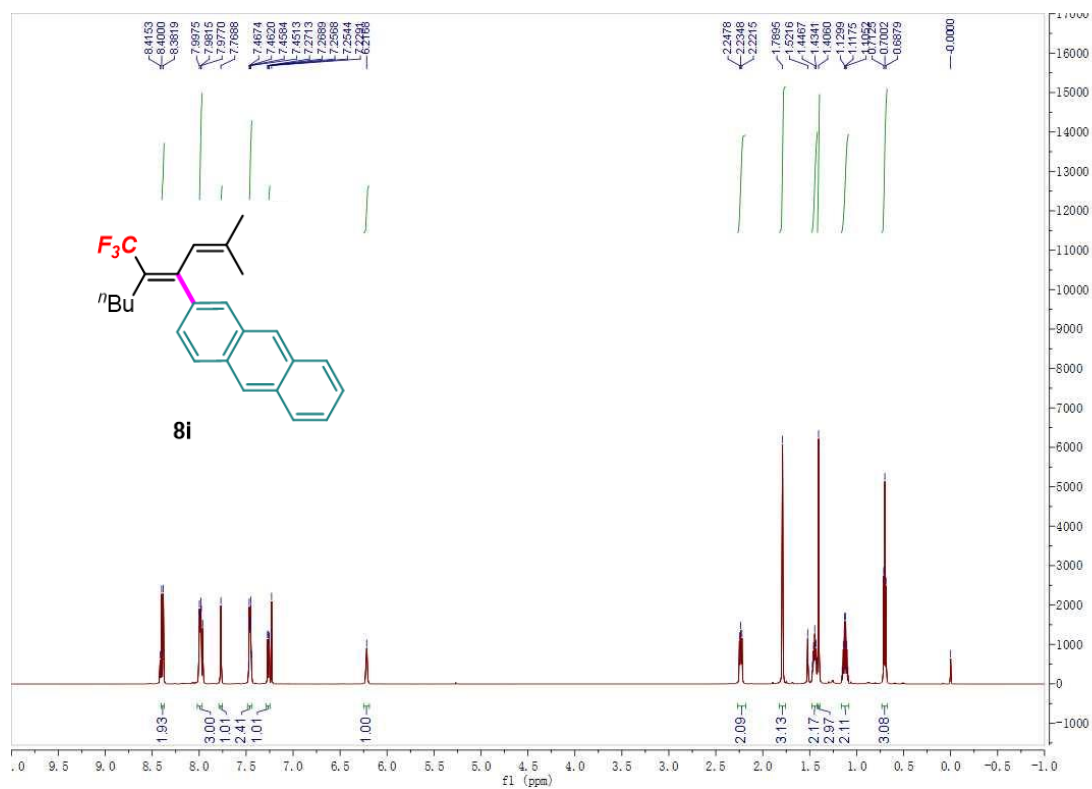

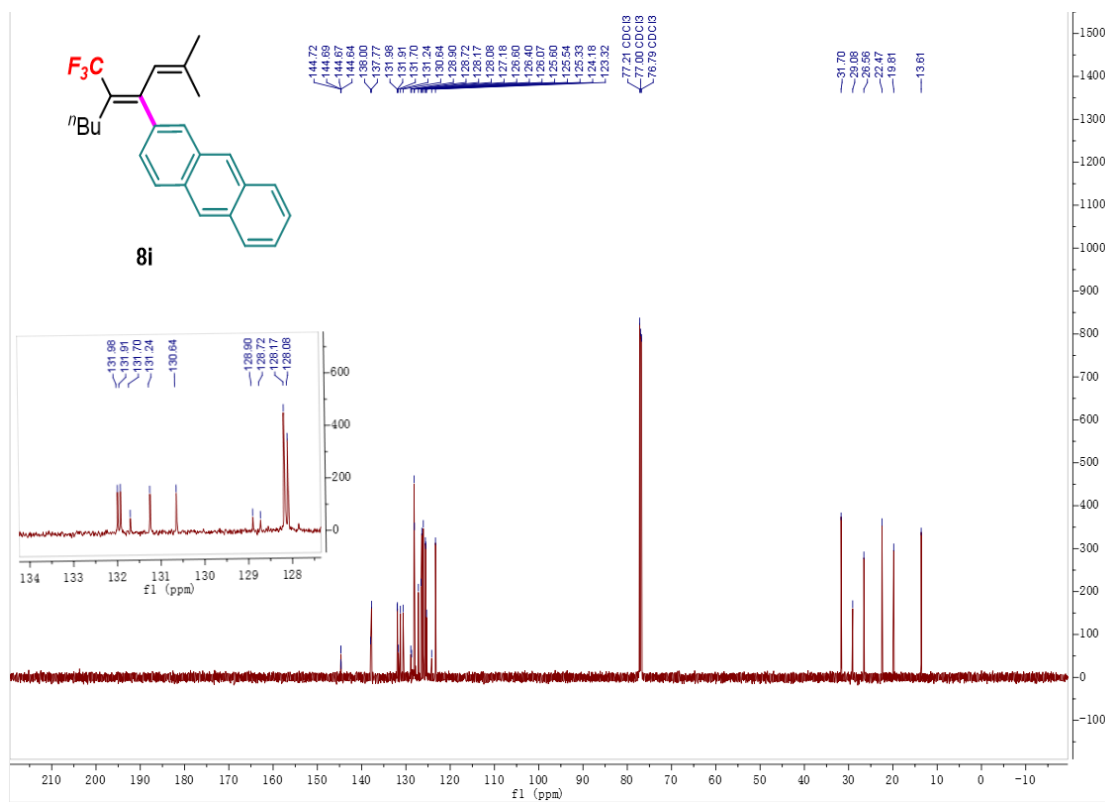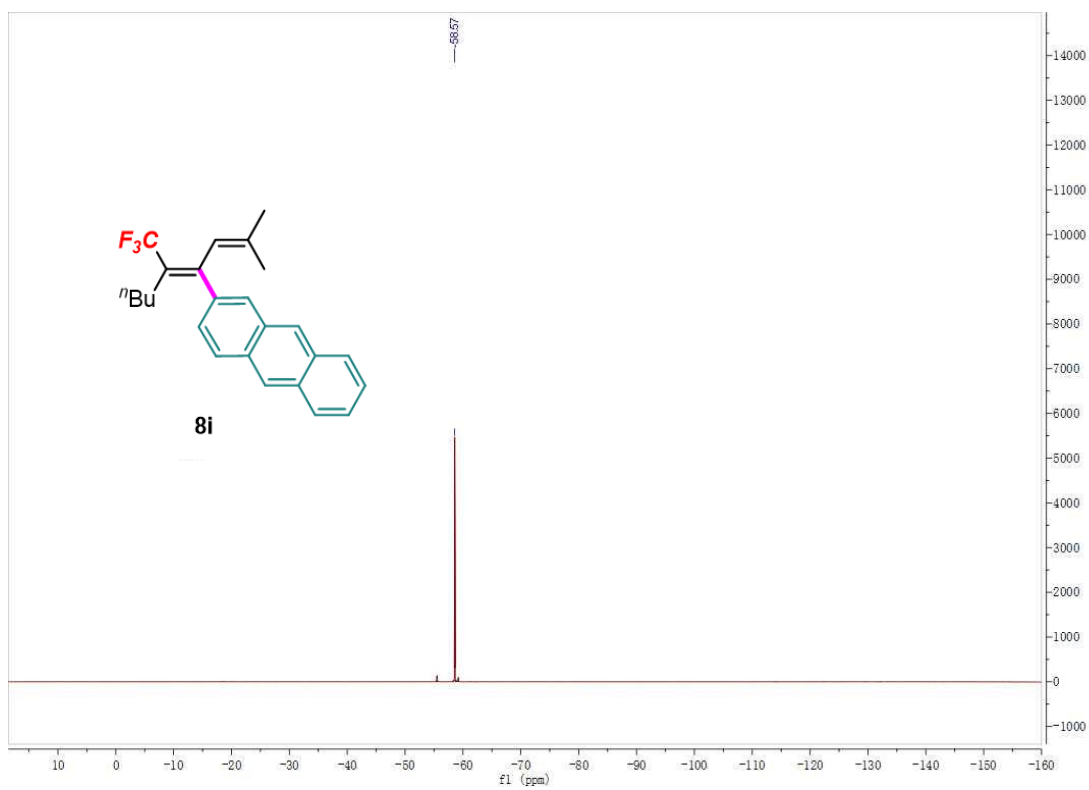

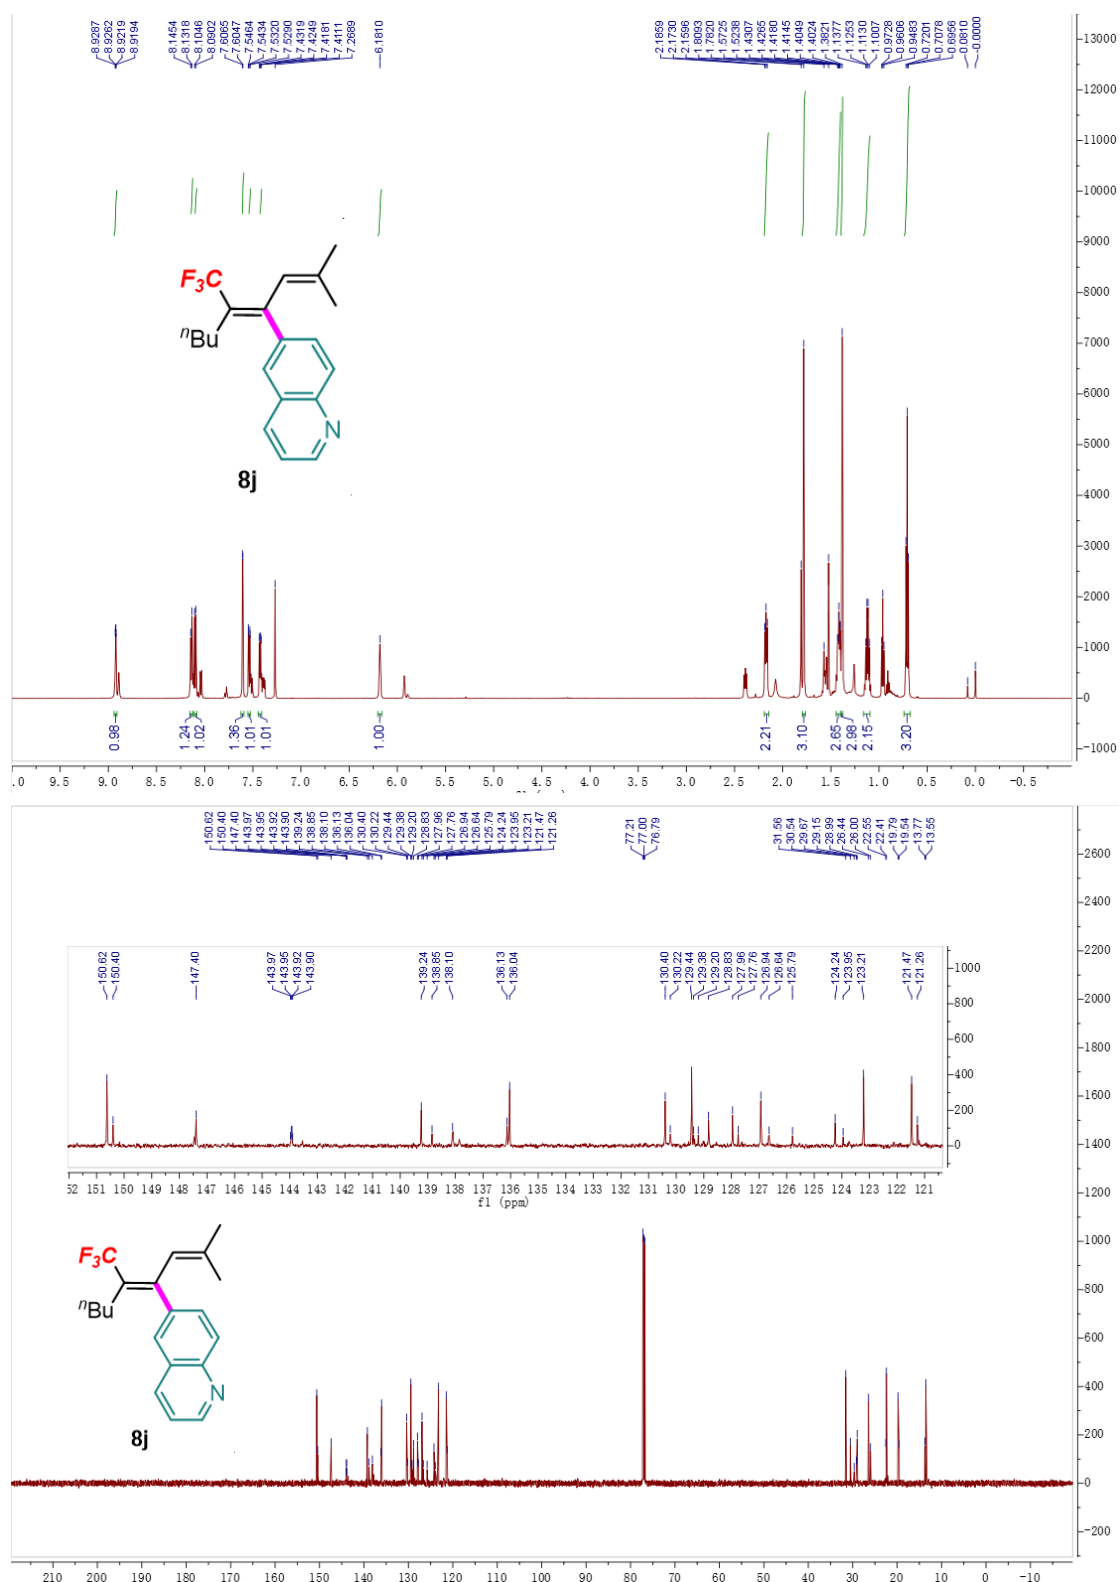

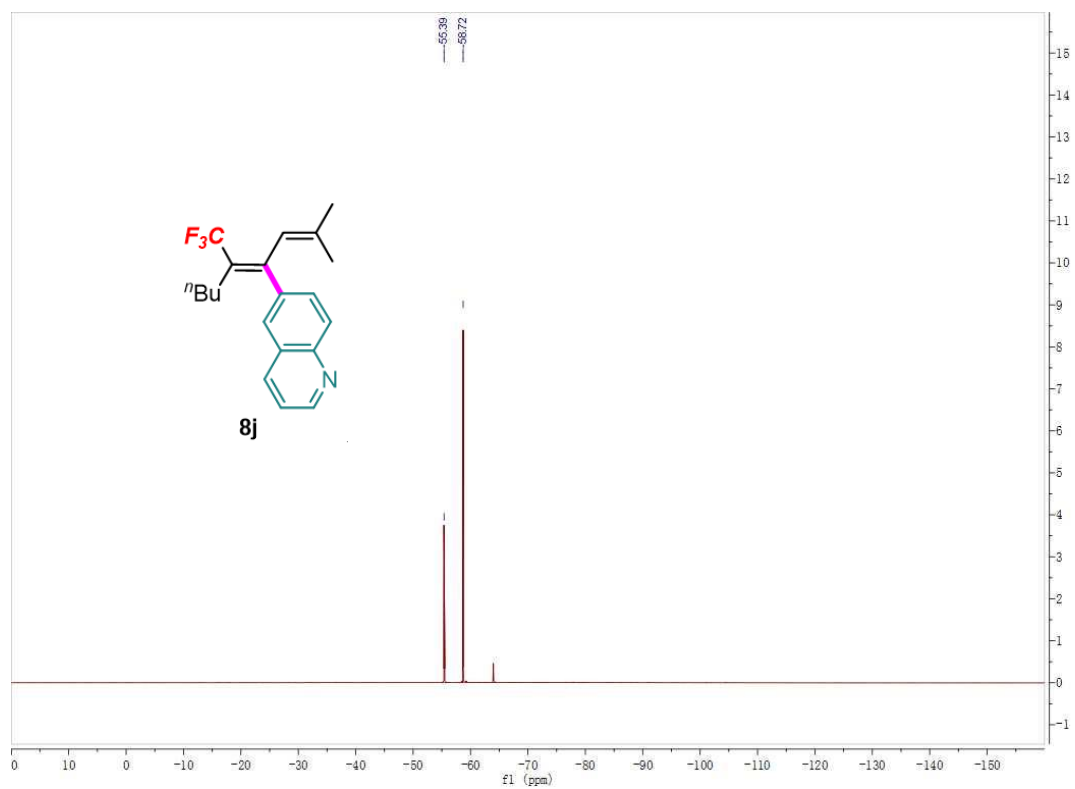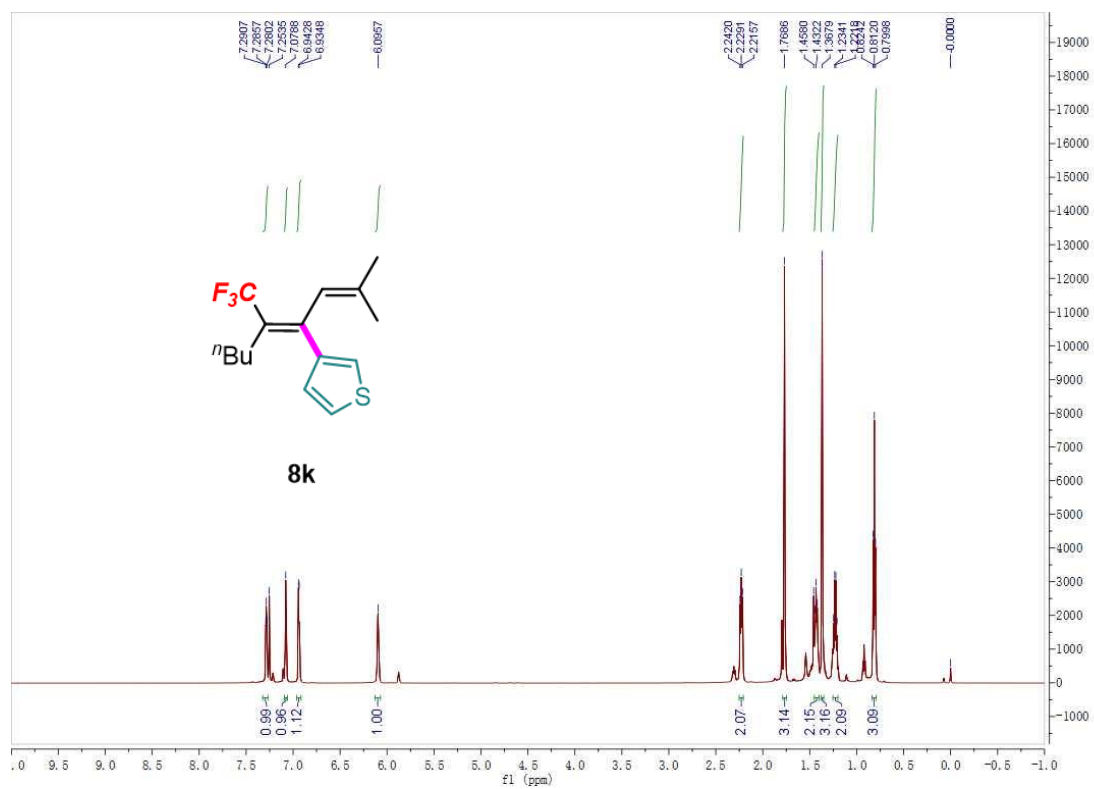

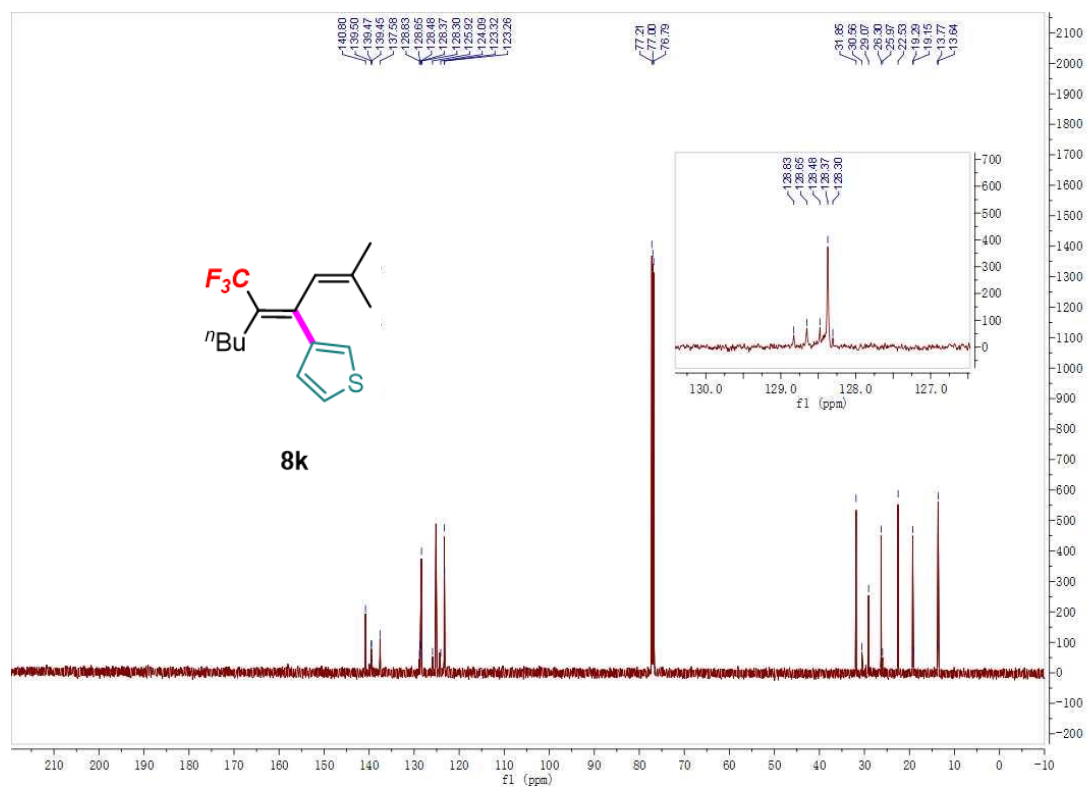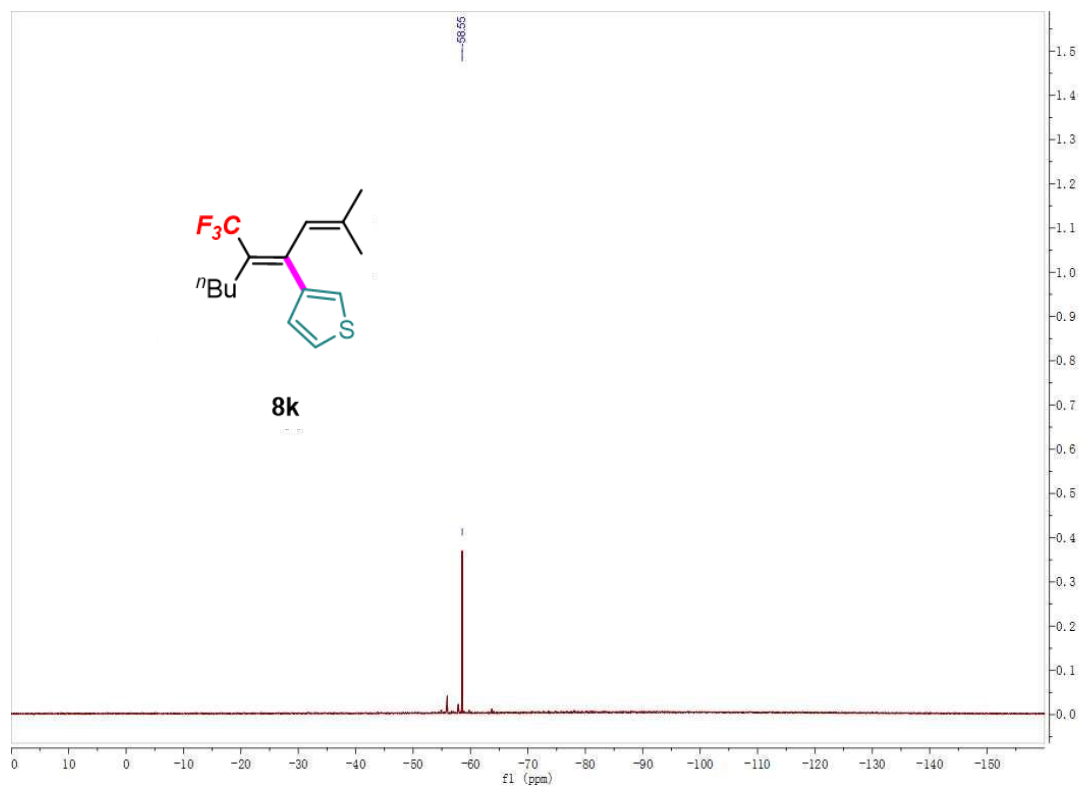

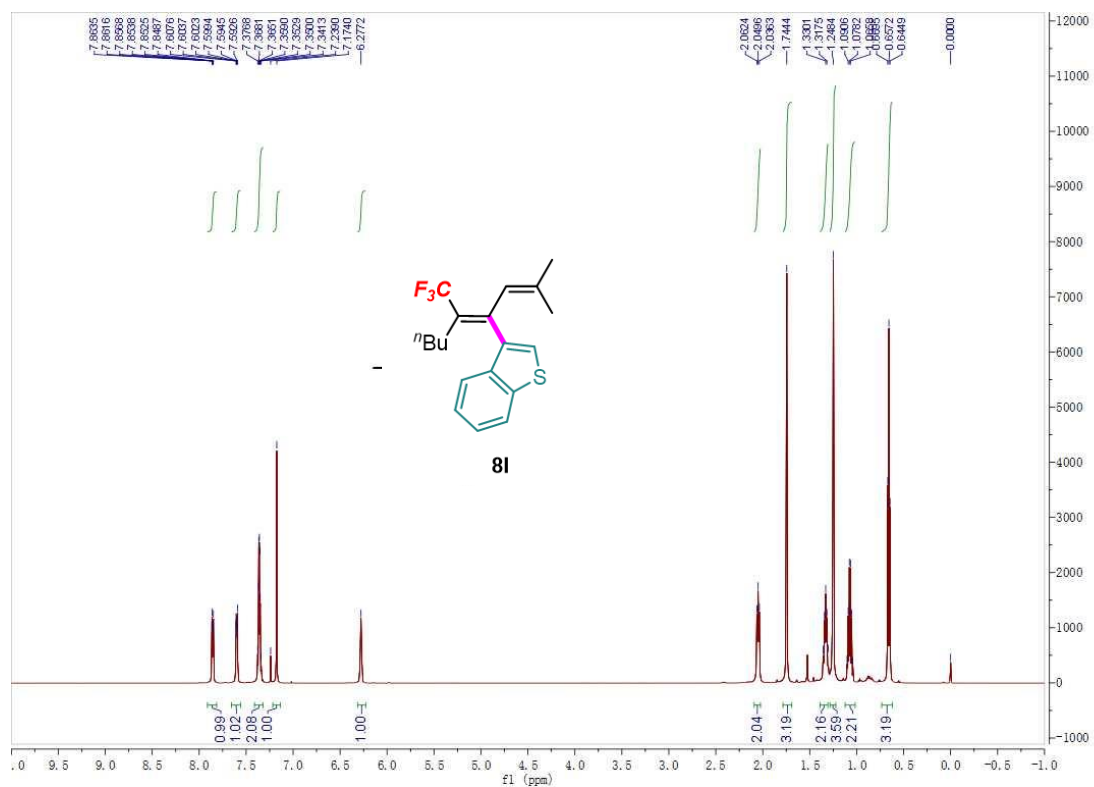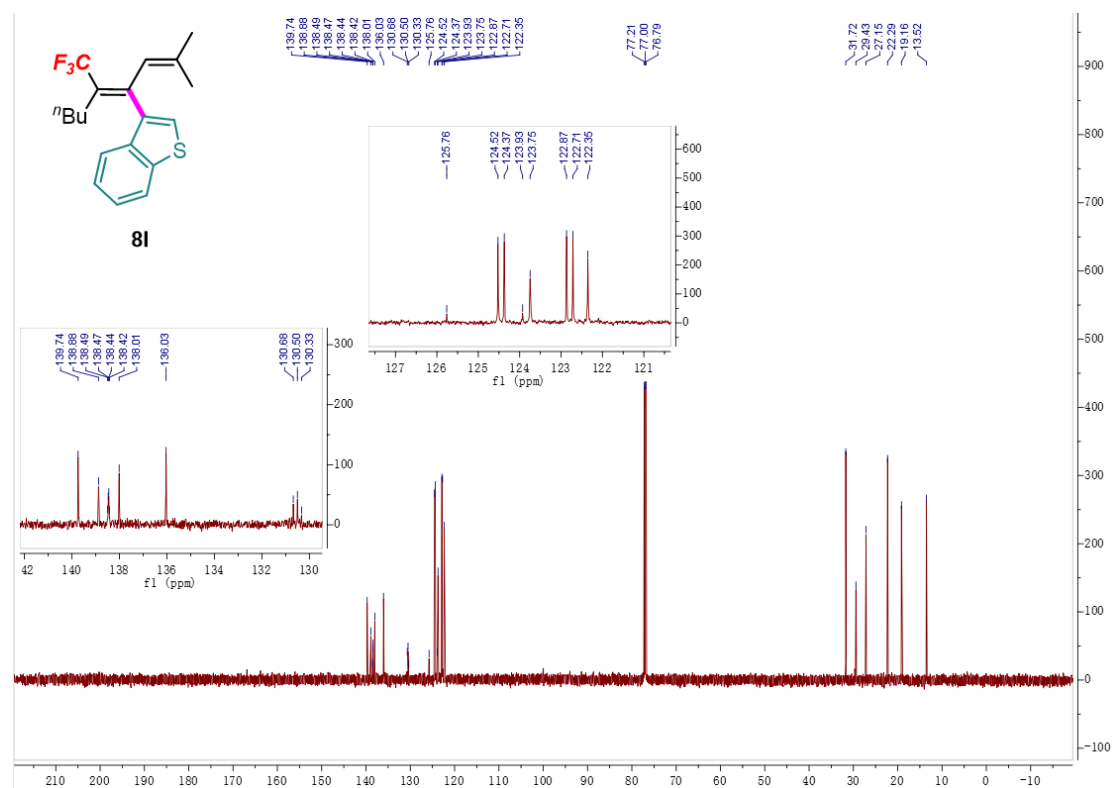

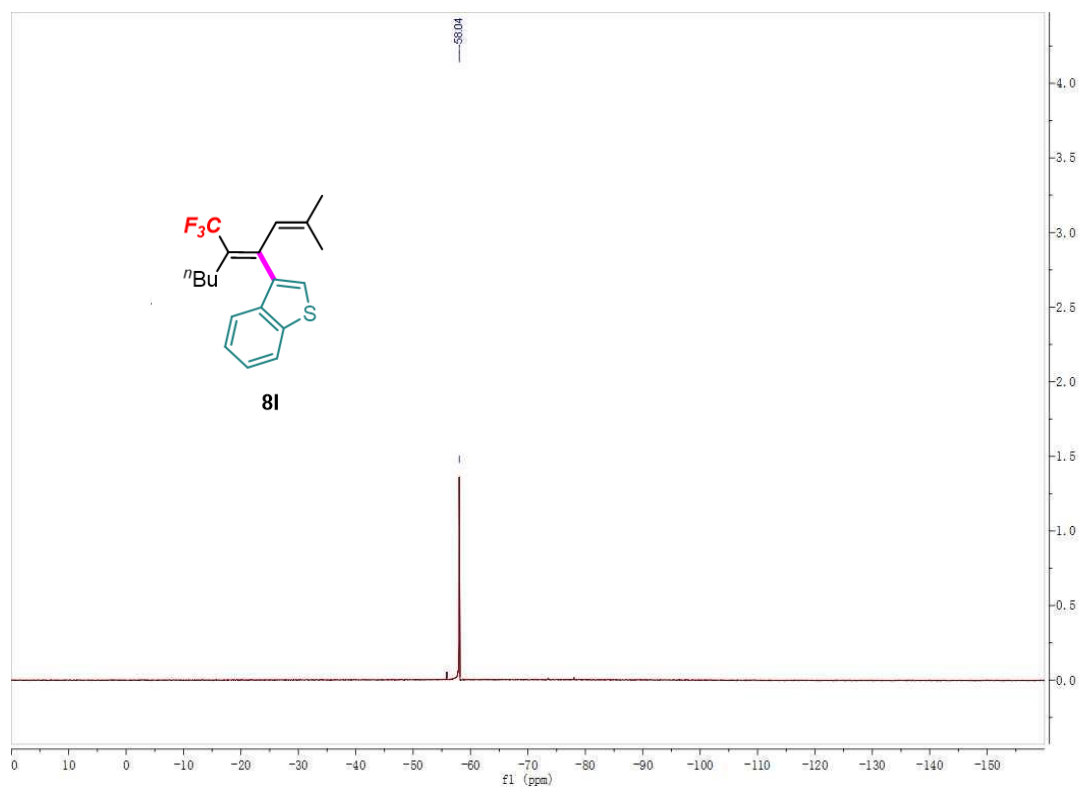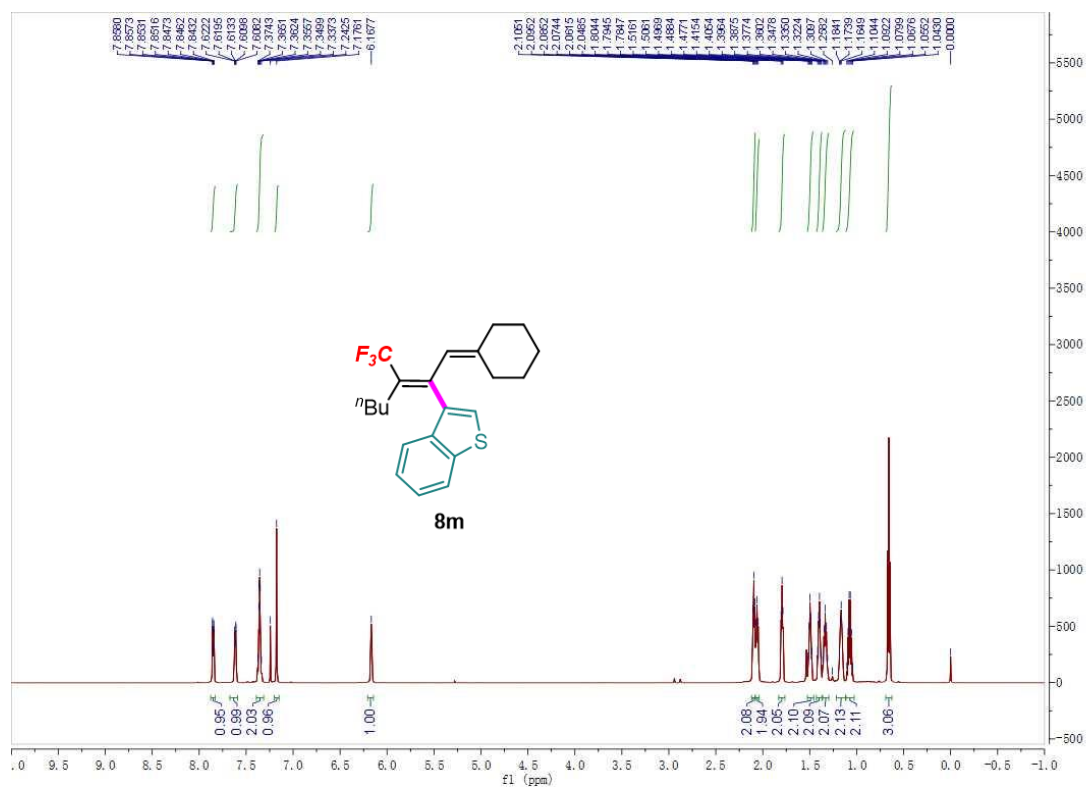





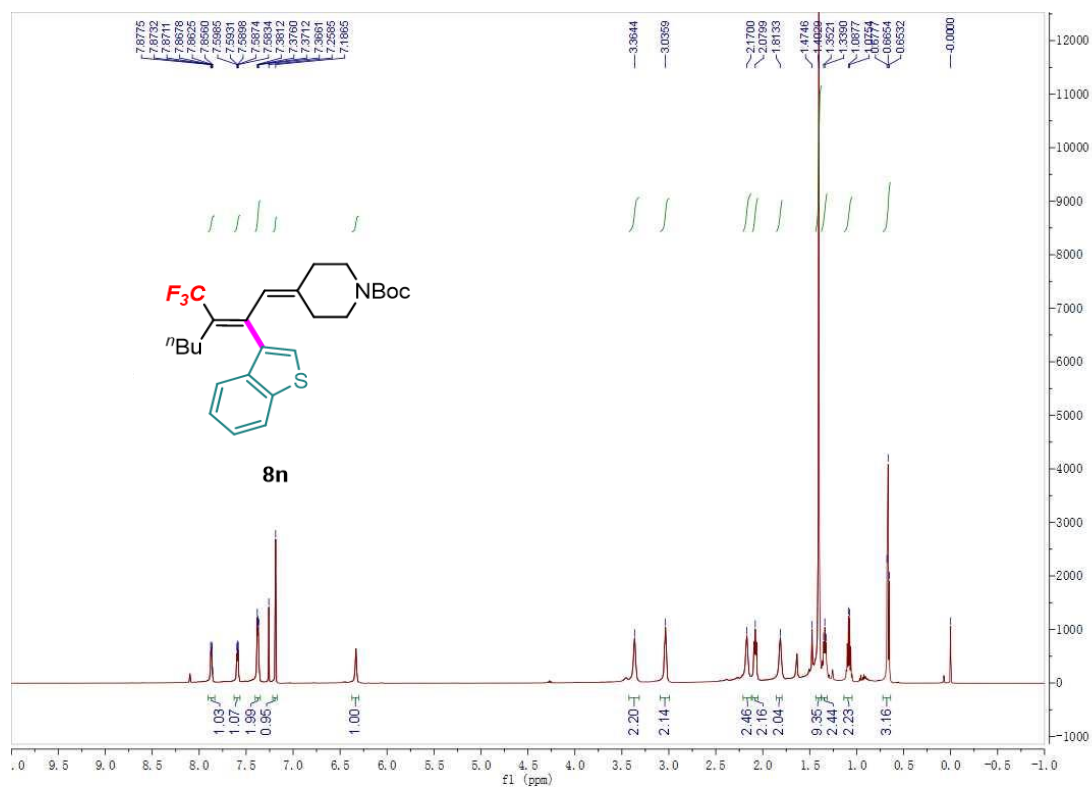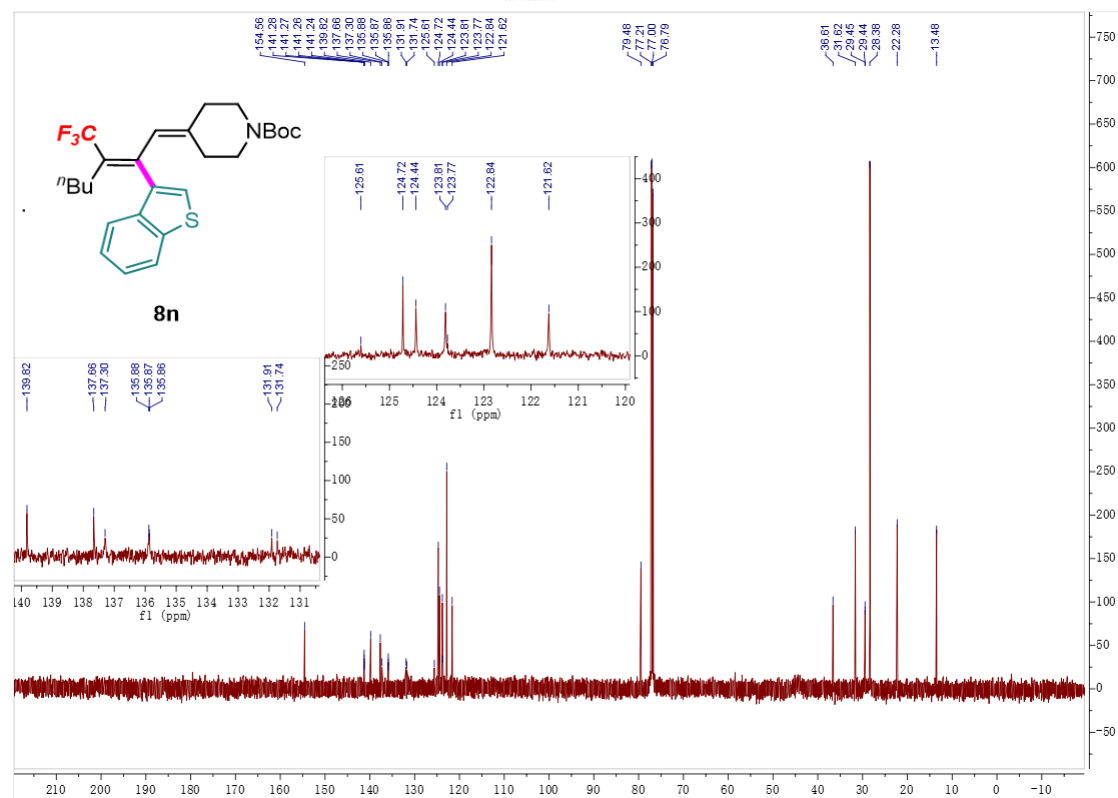

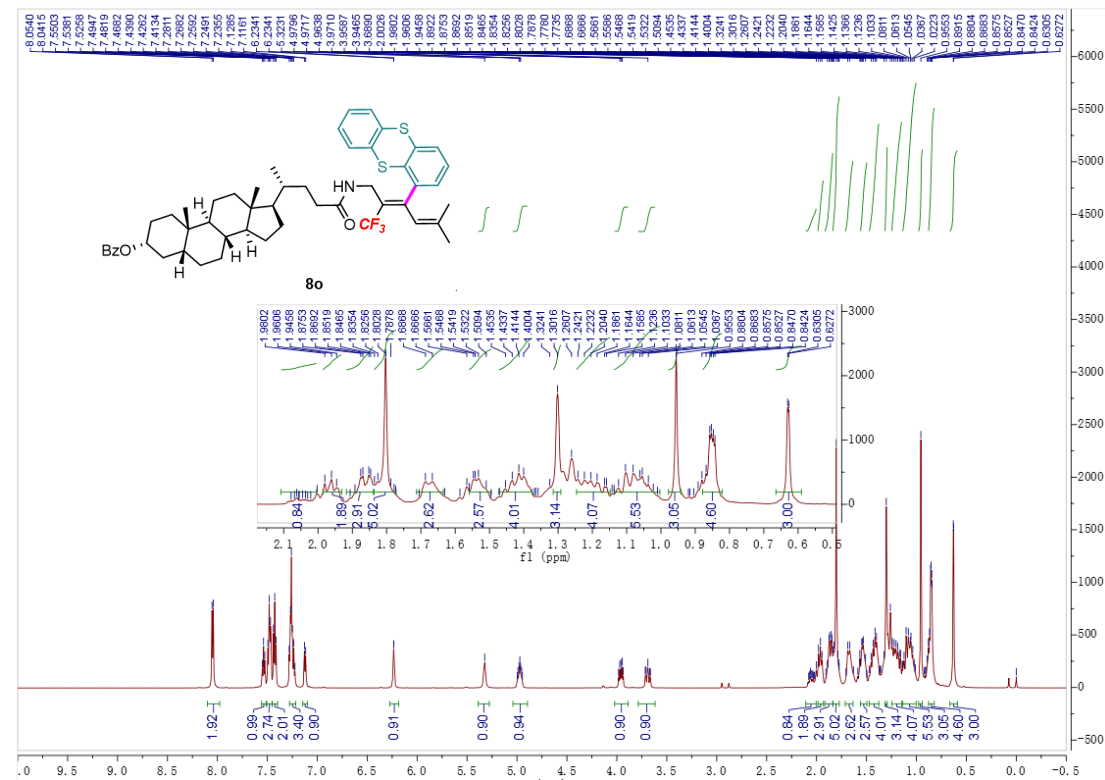

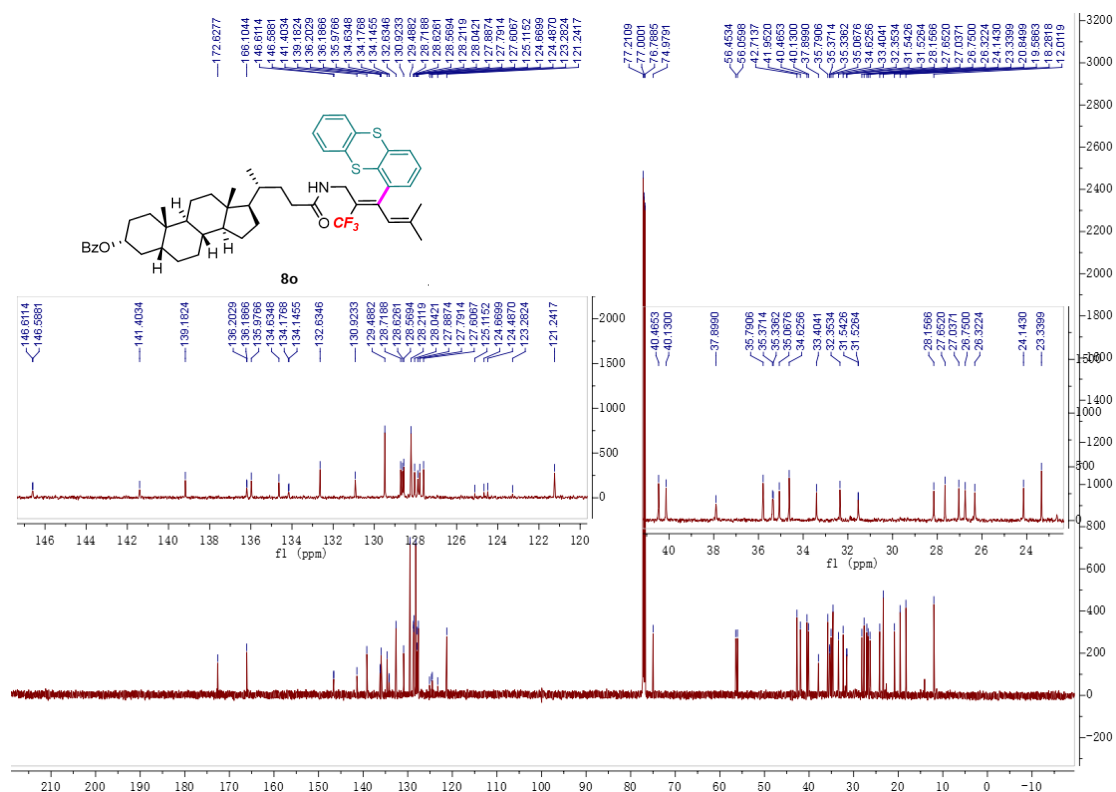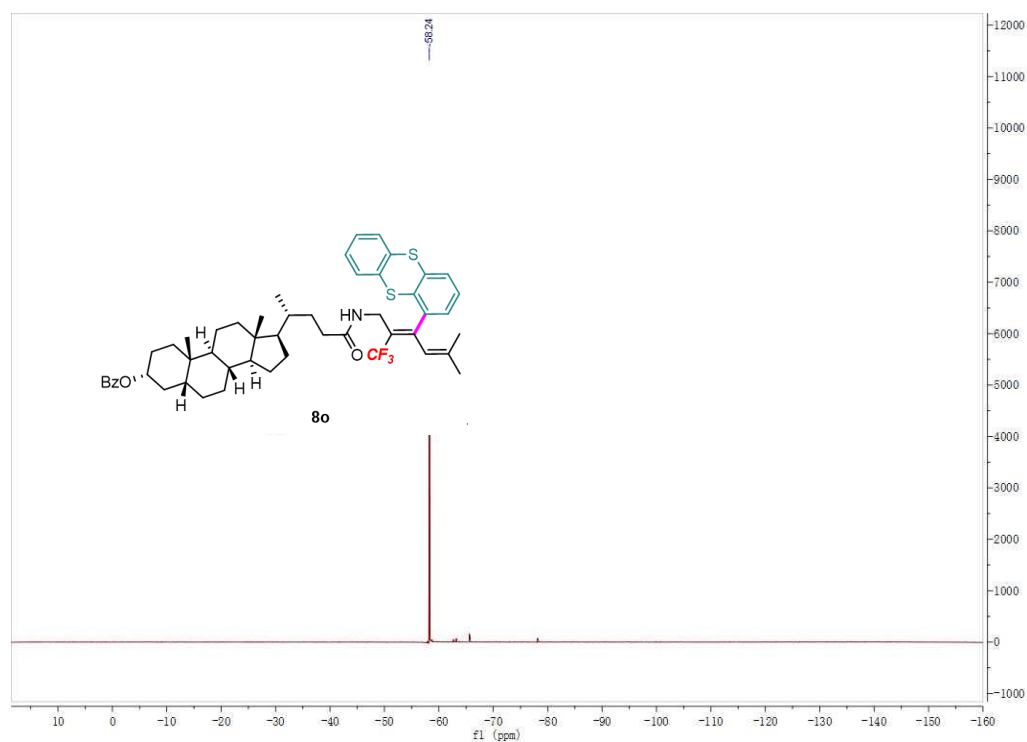

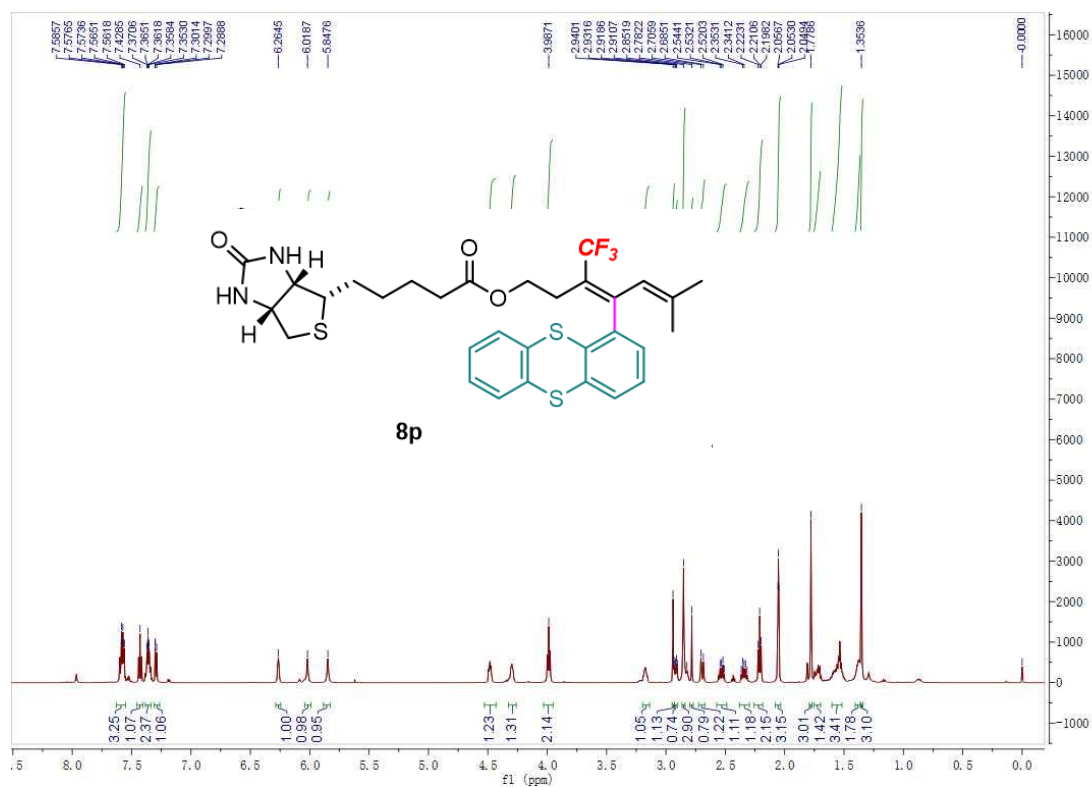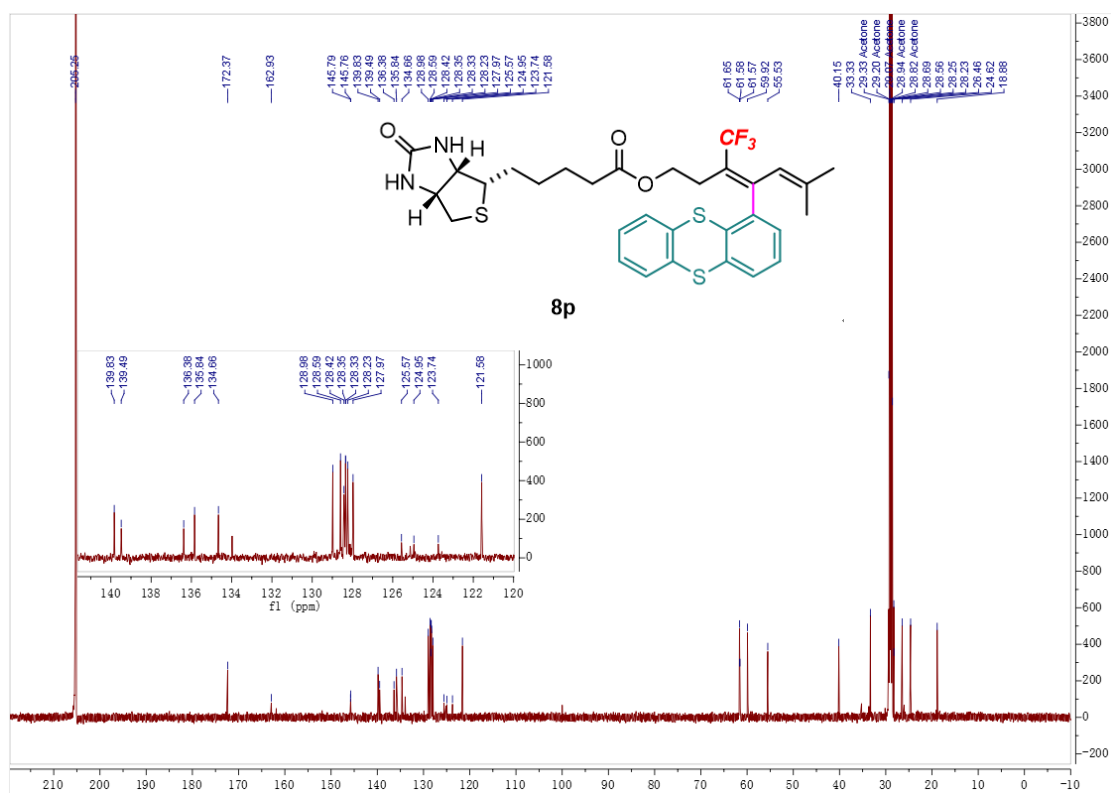

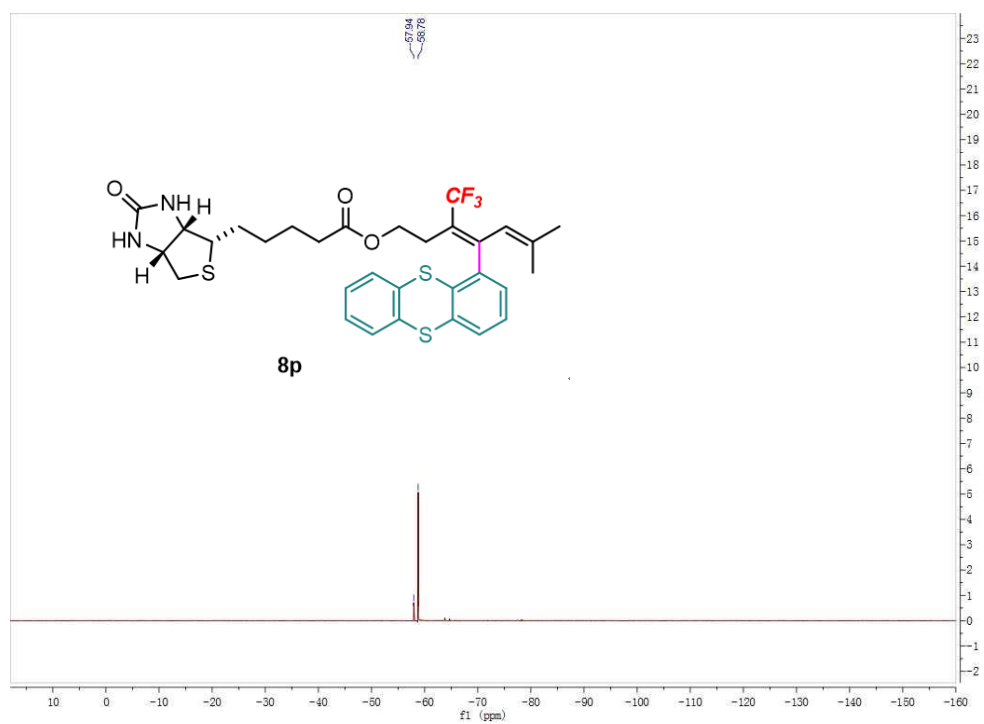

Supplement: Supplementary file 1 [file 38946407]
